# Supplementary material for: Composition, taxonomy and functional diversity of the oropharynx microbiome in individuals with schizophrenia and controls
Source: PeerJ. 2015 Aug 25;3:e1140. doi: 10.7717/peerj.1140 (PMC4556144; doi:10.7717/peerj.1140)
Supplement: File S2 — Spreadsheet with raw counts derived from PathoScope and taxonomy based on NCBI’s classification. [file peerj-03-1140-s004.xlsx]

## Sheet: sf2
OTUs	Superkingdom	Kingdom	Phylum	Class	Order	Family	Genus	Species	ES_001t	ES_007t	ES_010t	ES_014t	ES_017t	ES_019t	ES_024t	ES_043t	ES_046t	ES_048t	ES_069t	ES_080t	ES_088t	ES_089t	ES_095t	ES_099t	ES_104t	ES_106t	ES_107t	ES_108t	ES_110t	ES_114t	ES_116t	ES_132t	ES_137t	ES_147t	ES_158t	ES_207t	ES_208t	ES_209t	ES_210t	ES_211t
1	Bacteria	NA	Actinobacteria	Actinobacteria	Actinomycetales	Streptomycetaceae	Streptomyces	Streptomyces coelicolor	5	20	1	17	7	20	185	20	35	0	10	74	9	4	0	4	16	42	57	8	68	73	34	23	109	7	14	3	4	24	11	2
2	Bacteria	NA	Actinobacteria	Actinobacteria	Actinomycetales	Nocardiaceae	Rhodococcus	Rhodococcus jostii	2	4	2	15	0	6	57	11	6	0	13	5	8	2	0	6	16	82	91	14	56	144	183	1	129	9	8	5	4	7	35	0
3	Bacteria	NA	Proteobacteria	Gammaproteobacteria	Enterobacteriales	Enterobacteriaceae	Salmonella	Salmonella enterica	0	0	1	0	0	0	1	0	0	0	2	0	0	0	0	0	2	0	0	35	2	0	0	3	0	2	1	3	0	0	0	0
4	Viruses	NA	NA	NA	NA	Poxviridae	Parapoxvirus	Orf virus	0	0	0	0	0	0	0	0	0	0	0	0	0	0	0	0	0	0	0	0	1	0	0	0	0	0	0	0	0	0	0	0
5	Viruses	NA	NA	NA	NA	Poxviridae	Suipoxvirus	Swinepox virus	0	0	0	0	0	0	0	0	0	0	0	0	0	0	0	1	0	0	0	0	0	0	0	0	0	0	0	0	0	0	0	0
6	Bacteria	NA	Actinobacteria	Actinobacteria	Actinomycetales	Frankiaceae	Frankia	Frankia sp. EUN1f	0	4	3	4	2	8	41	5	4	0	1	6	0	2	0	2	6	16	10	4	13	22	19	2	17	0	7	2	4	8	2	0
7	Viruses	NA	NA	NA	Herpesvirales	Herpesviridae	Simplexvirus	Human herpesvirus 1	0	0	0	0	0	0	0	0	0	0	0	0	0	10	0	0	0	0	0	0	0	0	0	0	0	0	0	0	0	0	0	0
8	Bacteria	NA	Cyanobacteria	NA	Nostocales	Nostocaceae	Nostoc	Nostoc sp. PCC 7120	1	0	2	0	0	0	1	0	0	0	0	1	0	0	0	1	2	1	0	0	2	0	0	0	0	0	0	0	0	0	0	0
9	Viruses	NA	NA	NA	Herpesvirales	Herpesviridae	Roseolovirus	Human herpesvirus 7	27	13	19	60	21	51	36	37	11	7	4	18	11	3	15	11	11	0	98	14	11	2	0	18	31	115	4	42	19	2	112	3
10	Viruses	NA	NA	NA	Herpesvirales	Herpesviridae	Lymphocryptovirus	Human herpesvirus 4	0	0	0	0	0	0	0	2	106	0	0	0	0	0	0	0	0	0	32	0	5	0	0	0	0	0	0	7	0	0	0	0
11	Viruses	NA	NA	NA	Herpesvirales	Herpesviridae	Rhadinovirus	Bovine herpesvirus 4	0	0	0	0	0	0	0	0	0	0	0	0	0	0	0	0	0	0	0	0	0	0	0	0	0	1	0	0	0	0	0	0
12	Viruses	NA	NA	NA	Herpesvirales	Herpesviridae	Mardivirus	Gallid herpesvirus 2	0	0	0	0	2	1	2	0	0	0	0	0	0	1	0	0	0	0	0	0	0	0	0	0	0	0	0	0	0	0	0	0
13	Eukaryota	Fungi	Ascomycota	Dothideomycetes	Capnodiales	Mycosphaerellaceae	Zymoseptoria	Zymoseptoria tritici	0	0	0	1	0	0	0	0	0	0	3	0	0	0	0	0	0	0	0	0	0	0	0	0	0	0	0	0	0	0	0	0
14	Viruses	NA	NA	NA	NA	Iridoviridae	Ranavirus	Frog virus 3	0	0	0	0	0	0	0	0	0	0	0	0	0	0	0	0	0	0	0	0	1	0	0	0	0	0	0	0	0	0	0	0
15	Viruses	NA	NA	NA	NA	Adenoviridae	Mastadenovirus	Human adenovirus C	1	1	0	1	0	0	1	1	1	0	0	0	0	0	1	0	0	2	0	0	0	0	0	0	0	0	2	1	0	0	0	0
16	Viruses	NA	NA	NA	NA	Adenoviridae	Mastadenovirus	Human adenovirus C	0	0	0	0	0	0	0	1	0	0	0	0	0	0	0	0	0	0	0	0	0	0	0	0	0	0	0	1	0	1	0	0
17	Bacteria	NA	Proteobacteria	Gammaproteobacteria	Chromatiales	Chromatiaceae	Nitrosococcus	Nitrosococcus watsonii	1	0	0	1	0	2	1	2	0	0	0	1	0	0	0	1	0	0	5	0	1	0	0	0	0	0	1	0	0	0	1	0
18	Viruses	NA	NA	NA	NA	Polyomaviridae	Polyomavirus	Simian virus 40	0	0	0	0	0	0	0	0	0	0	0	0	0	0	0	0	0	0	0	0	0	0	0	0	0	0	1	0	0	0	0	0
19	Bacteria	NA	Actinobacteria	Actinobacteria	Actinomycetales	Frankiaceae	Frankia	Frankia sp. CcI3	0	4	0	0	1	12	37	4	5	0	1	2	0	1	0	0	3	7	9	3	4	21	3	2	3	0	3	0	1	3	0	0
20	Viruses	NA	NA	NA	NA	Caulimoviridae	Caulimovirus	Cauliflower mosaic virus	0	0	0	1	0	0	0	0	0	0	0	0	0	0	0	0	0	0	0	0	0	0	0	0	0	0	0	0	0	0	0	0
21	Viruses	NA	NA	NA	Caudovirales	Myoviridae	T4likevirus	Enterobacteria phage T4 sensu lato	0	0	1	1	0	0	0	0	0	0	0	0	0	0	1	0	0	0	0	0	0	0	0	0	0	0	1	0	0	0	0	0
22	Viruses	NA	NA	NA	Caudovirales	Myoviridae	Spounalikevirus	Bacillus phage SPO1	0	0	0	0	0	0	0	0	0	0	0	0	0	0	0	0	0	0	0	0	0	0	0	0	0	0	0	0	0	0	0	1
23	Viruses	NA	NA	NA	Caudovirales	Myoviridae	Hpunalikevirus	Haemophilus phage HP1	0	0	12	0	16	0	1	0	2	0	0	0	0	0	1	9	0	0	16	0	156	0	7	1	0	0	0	4	1642	0	3	4
24	Viruses	NA	NA	NA	Caudovirales	Siphoviridae	Lambdalikevirus	Enterobacteria phage lambda	2	3	0	8	1	2	5	14	1	1	8	1	4	7	2	5	1	9	0	2	0	1	10	1	1	0	17	11	4	2	2	4
25	Viruses	NA	NA	NA	NA	Caulimoviridae	Cavemovirus	Tobacco vein clearing virus	0	0	0	0	0	1	0	0	0	0	0	0	0	0	0	0	0	2	0	0	0	0	0	0	0	0	0	0	0	0	0	0
26	Viruses	NA	NA	NA	Caudovirales	Podoviridae	NA	Streptococcus phage Cp-1	0	0	0	12	0	0	0	0	1	0	44	0	0	0	0	0	0	0	21	0	0	28	15	0	0	0	22	0	0	20	98	0
27	Viruses	NA	NA	NA	Caudovirales	Podoviridae	T7likevirus	Enterobacteria phage T7	2	5	4	1	2	0	0	8	1	0	4	4	0	7	3	1	4	4	0	0	1	4	3	2	2	0	27	10	7	4	0	1
28	Viruses	NA	NA	NA	NA	Microviridae	Microvirus	Enterobacteria phage alpha3	0	0	0	0	0	0	0	0	0	0	0	1	0	0	0	0	0	0	0	1	0	0	0	0	0	0	0	0	0	0	0	0
29	Viruses	NA	NA	NA	NA	Inoviridae	Inovirus	Enterobacteria phage M13	0	3	2	4	0	2	4	12	2	2	5	5	5	6	1	0	1	8	1	0	1	4	3	1	1	1	33	6	11	5	1	7
30	Bacteria	NA	Cyanobacteria	NA	Chroococcales	NA	Synechococcus	Synechococcus sp. CC9605	0	1	0	0	0	0	0	0	1	0	1	0	0	0	0	0	0	1	4	1	1	1	1	0	1	0	6	0	0	1	2	0
31	Viruses	NA	NA	NA	NA	Flaviviridae	Pestivirus	Bovine viral diarrhea virus 1	0	0	0	0	0	0	0	0	0	0	0	0	0	0	0	0	0	0	0	0	0	0	0	0	0	0	0	0	1	0	0	0
32	Viruses	NA	NA	NA	Caudovirales	Siphoviridae	NA	Streptococcus phage 7201	1	1	5	0	4	13	1	0	16	0	0	21	0	0	0	0	0	0	0	5	5	4	8	28	21	0	296	0	0	1	1	0
33	Eukaryota	Fungi	Ascomycota	Dothideomycetes	Jahnulales	Aliquandostipitaceae	Aliquandostipite	Aliquandostipite khaoyaiensis	0	0	0	0	0	0	0	0	0	0	0	0	0	0	0	0	1	0	0	0	0	0	0	0	0	0	1	0	0	0	0	0
34	Viruses	NA	NA	NA	NA	Ascoviridae	Ascovirus	Spodoptera frugiperda ascovirus 1a	0	0	0	0	0	0	0	0	0	0	0	0	0	0	1	0	0	0	0	0	0	0	0	0	0	0	0	0	0	0	0	0
35	Viruses	NA	NA	NA	Caudovirales	Siphoviridae	NA	Lactococcus phage ul36	0	0	0	0	0	0	0	0	0	0	0	0	0	0	0	0	0	0	2	0	0	2	0	0	0	0	0	0	0	0	0	0
36	Bacteria	NA	Proteobacteria	Alphaproteobacteria	Rhizobiales	Bradyrhizobiaceae	Bradyrhizobium	Bradyrhizobium sp. ORS 278	8	1	6	2	0	4	8	7	0	1	3	5	3	2	1	0	5	3	11	4	3	5	2	1	4	2	11	9	2	0	0	1
37	Bacteria	NA	Cyanobacteria	NA	Chroococcales	NA	Synechocystis	Synechocystis sp. PCC 6803	0	0	0	0	0	0	0	0	0	0	0	1	0	0	0	0	0	0	1	0	0	1	3	0	0	0	0	0	0	0	0	0
38	Bacteria	NA	Chlamydiae	Chlamydiia	Chlamydiales	Chlamydiaceae	Chlamydia	Chlamydia pneumoniae	0	0	0	0	0	0	1	0	0	0	0	0	0	0	0	0	0	0	1	0	0	0	0	0	0	0	0	0	0	1	0	0
39	Eukaryota	Fungi	Ascomycota	Dothideomycetes	Botryosphaeriales	Phyllostictaceae	Guignardia	Guignardia bidwellii	14	11	5	16	12	14	25	11	8	4	5	5	4	5	4	9	1	2	0	5	2	1	1	6	6	0	5	2	1	5	1	5
40	Viruses	NA	NA	NA	NA	Retroviridae	Lentivirus	Human immunodeficiency virus 1	13	13	79	14	3	5	27	29	3	2	21	111	9	21	99	5	5	13	3	15	89	8	6	6	24	0	58	104	8	8	6	50
41	Bacteria	NA	Cyanobacteria	NA	Oscillatoriales	NA	Coleofasciculus	Coleofasciculus chthonoplastes	0	2	3	1	0	0	1	0	0	0	0	0	0	0	0	0	0	0	0	0	1	0	0	0	0	1	1	0	0	0	0	0
42	Viruses	NA	NA	NA	Caudovirales	Siphoviridae	NA	Streptococcus phage MM1	0	2	3	27	25	39	224	6	5	415	12	22	26	0	82	17	558	14	100	29	3088	39	10	3	495	26	171	3	106	530	138	5
43	Bacteria	NA	Proteobacteria	Gammaproteobacteria	Vibrionales	Vibrionaceae	Photobacterium	Photobacterium sp. SKA34	0	0	0	0	0	0	0	0	0	0	0	0	0	0	0	0	0	1	0	0	0	0	0	0	0	0	0	0	0	0	0	0
44	Bacteria	NA	Proteobacteria	Betaproteobacteria	Neisseriales	Neisseriaceae	Neisseria	Neisseria meningitidis	0	95	1276	11	33	11	519	11	5	193	0	241	256	225	310	3208	1843	9339	5479	7	108672	72	11	3	0	23	113066	117	35403	536	2	4549
45	Bacteria	NA	Aquificae	Aquificae	Aquificales	Hydrogenothermaceae	Persephonella	Persephonella marina	0	0	0	0	1	0	2	0	0	0	0	0	0	0	0	0	0	1	0	0	1	0	1	0	1	0	0	0	0	1	0	0
46	Viruses	NA	NA	NA	Caudovirales	Myoviridae	NA	Clostridium phage c-st	0	1	0	0	0	0	0	0	0	0	0	0	0	0	0	0	0	0	0	0	0	0	0	0	0	0	0	0	0	0	1	0
47	Viruses	NA	NA	NA	Caudovirales	Siphoviridae	NA	Staphylococcus phage 11	0	0	0	0	0	0	0	0	0	0	0	0	0	0	0	0	0	0	0	0	0	0	0	0	0	2	0	0	0	0	0	0
48	Viruses	NA	NA	NA	Caudovirales	Siphoviridae	NA	Lactococcus phage phiLC3	0	0	0	0	0	0	0	0	0	0	0	0	0	0	0	0	0	0	0	0	0	1	0	0	0	0	0	0	0	0	0	0
49	Viruses	NA	NA	NA	Caudovirales	Myoviridae	NA	Streptococcus phage EJ-1	0	51	41	538	173	790	6849	11	225	78	6	2	3	7	197	289	280	45	69	41	753	59	153	3	1	69	679	14	94	116	154	17
50	Viruses	NA	NA	NA	Caudovirales	Siphoviridae	NA	Lactobacillus phage phiadh	63	0	0	0	0	1	0	0	0	0	0	1	0	0	0	0	0	0	0	0	0	0	0	11	1	18	0	0	0	0	2	0
51	Eukaryota	NA	Apicomplexa	Aconoidasida	Haemosporida	NA	Plasmodium	Plasmodium vivax	1	3	2	4	1	0	2	2	1	0	0	9	0	1	0	0	8	9	6	1	9	10	9	1	1	0	8	0	8	1	2	0
52	Viruses	NA	NA	NA	NA	Poxviridae	Parapoxvirus	Pseudocowpox virus	0	0	0	0	0	0	0	0	0	0	0	0	0	0	0	0	0	0	0	0	1	0	0	0	0	0	0	0	0	0	0	0
53	Viruses	NA	NA	NA	NA	Adenoviridae	Mastadenovirus	Bovine adenovirus B	0	0	0	0	0	0	0	2	0	0	0	0	0	0	0	0	0	0	0	0	0	0	0	0	0	0	0	0	0	0	0	0
54	Viruses	NA	NA	NA	NA	Adenoviridae	Mastadenovirus	Human adenovirus C	1	1	0	1	0	0	1	1	1	0	0	0	0	0	1	0	0	2	0	0	0	0	0	0	0	0	2	1	0	0	0	0
55	Viruses	NA	NA	NA	NA	Baculoviridae	Alphabaculovirus	Maruca vitrata nucleopolyhedrovirus	0	0	0	0	0	0	0	0	0	0	0	0	0	0	0	0	0	0	0	0	0	0	0	1	0	0	0	0	0	0	0	0
56	Eukaryota	Fungi	Ascomycota	Saccharomycetes	Saccharomycetales	NA	Brettanomyces	Brettanomyces custersianus	0	0	0	0	0	0	0	0	0	0	0	0	0	0	0	0	0	0	0	0	0	0	0	0	0	0	1	0	0	0	0	0
57	Eukaryota	Fungi	Ascomycota	Dothideomycetes	Pleosporales	Sporormiaceae	Westerdykella	Westerdykella cylindrica	0	0	0	0	0	0	61	0	0	0	0	0	0	0	0	0	0	0	0	0	0	0	0	0	0	0	0	0	0	0	0	0
58	Bacteria	NA	Proteobacteria	Alphaproteobacteria	Rhodospirillales	Rhodospirillaceae	Azospirillum	Azospirillum lipoferum	2	5	21	5	2	4	14	7	2	1	39	14	4	14	2	0	2	34	11	32	18	2	7	9	15	1	12	8	12	5	5	0
59	Bacteria	NA	Firmicutes	Clostridia	Clostridiales	Peptococcaceae	Desulfitobacterium	Desulfitobacterium hafniense	1	0	0	1	1	10	6	2	1	0	0	2	0	0	1	1	9	8	8	4	10	6	3	3	2	0	10	1	4	6	1	0
60	Viruses	NA	NA	NA	Caudovirales	Siphoviridae	NA	Lactobacillus prophage Lj965	4	0	0	0	0	1	0	0	0	0	0	0	0	0	0	0	0	0	0	0	0	0	0	0	0	17	0	0	0	0	0	0
61	Bacteria	NA	Cyanobacteria	NA	Prochlorales	Prochlorococcaceae	Prochlorococcus	Prochlorococcus marinus	0	0	0	0	0	0	0	0	1	0	0	0	0	1	0	0	0	0	0	0	0	0	0	0	0	0	0	0	0	0	0	0
62	Eukaryota	Fungi	Ascomycota	Saccharomycetes	Saccharomycetales	NA	Candida	Candida neerlandica	0	0	0	0	0	0	0	2	0	0	0	2	0	0	0	0	0	0	0	0	0	0	0	0	0	0	0	0	0	0	0	0
63	Bacteria	NA	Proteobacteria	Gammaproteobacteria	Vibrionales	Vibrionaceae	Vibrio	Vibrio sp. Ex25	0	0	1	0	1	23	72	0	1	0	0	1	1	0	0	1	5	3	22	0	138	0	0	0	1	0	8	0	18	0	1	1
64	Viruses	NA	NA	NA	NA	Flaviviridae	Pestivirus	Pestivirus Giraffe-1	0	0	0	0	0	0	0	0	0	0	0	0	0	0	0	0	0	0	0	0	0	0	0	0	0	0	0	0	1	0	0	0
65	Bacteria	NA	Proteobacteria	Gammaproteobacteria	Xanthomonadales	Xanthomonadaceae	Xylella	Xylella fastidiosa	15	22	26	26	5	3	19	58	6	6	35	23	10	34	22	10	12	28	4	29	3	16	13	6	10	5	122	56	18	18	13	6
66	Bacteria	NA	Proteobacteria	Gammaproteobacteria	Alteromonadales	NA	NA	Alteromonadales bacterium TW-7	0	0	1	0	1	1	4	0	0	0	0	2	1	0	1	0	12	4	7	0	3	0	1	0	0	0	18	2	22	0	1	1
67	Bacteria	NA	Proteobacteria	Alphaproteobacteria	Magnetococcales	Magnetococcaceae	Magnetococcus	Magnetococcus marinus	0	0	0	0	0	0	1	0	0	0	1	2	1	0	0	0	2	6	12	2	18	4	1	0	2	0	7	0	9	0	2	0
68	Viruses	NA	NA	NA	Caudovirales	Myoviridae	Hpunalikevirus	Haemophilus phage HP2	0	0	0	0	31	0	0	0	5	0	0	0	1	0	2	32	1	0	89	0	26	2	0	1	0	0	5	2	266	3	11	0
69	Viruses	NA	NA	NA	Mononegavirales	Paramyxoviridae	Avulavirus	Avian paramyxovirus 6	0	0	0	0	0	1	0	0	0	0	0	0	0	0	0	0	0	0	0	0	0	0	0	0	0	0	0	0	0	0	0	0
70	Viruses	NA	NA	NA	Caudovirales	Siphoviridae	NA	Streptococcus phage SM1	0	7	54	64	352	510	354	117	96	175	11	3	8	2	47	22	356	97	203	79	1516	1131	1579	10	6	17	496	46	3203	606	1718	201
71	Bacteria	NA	Proteobacteria	Betaproteobacteria	Rhodocyclales	Rhodocyclaceae	Dechloromonas	Dechloromonas aromatica	0	2	10	11	2	0	12	3	0	0	2	1	0	3	1	1	4	2	3	3	4	1	1	2	2	0	10	15	2	9	1	0
72	Bacteria	NA	Chlamydiae	Chlamydiia	Chlamydiales	Parachlamydiaceae	Parachlamydia	Parachlamydia acanthamoebae	0	0	0	0	0	0	0	0	0	0	0	0	0	0	0	0	0	1	0	0	1	0	0	0	0	0	2	0	1	0	0	0
73	Eukaryota	Viridiplantae	Chlorophyta	Ulvophyceae	Ulvales	NA	Pseudendoclonium	Pseudendoclonium akinetum	0	0	0	0	0	0	0	0	0	0	0	0	0	0	0	0	0	0	3	0	4	1	0	0	0	0	0	0	1	1	0	0
521	Bacteria	NA	Proteobacteria	Gammaproteobacteria	Pseudomonadales	Pseudomonadaceae	Pseudomonas	Pseudomonas aeruginosa	1	0	0	4	1	0	2	5	1	1	8	1	0	5	2	0	0	2	0	11	0	1	1	0	1	0	4	1	2	2	1	1
75	Eukaryota	NA	NA	Dinophyceae	Peridiniales	Peridiniaceae	Kryptoperidinium	Kryptoperidinium foliaceum	0	0	0	0	0	0	0	0	0	0	1	0	0	0	0	0	0	0	0	0	0	0	0	0	0	0	0	0	0	0	0	0
76	Bacteria	NA	Proteobacteria	Alphaproteobacteria	Sphingomonadales	Erythrobacteraceae	Erythrobacter	Erythrobacter sp. SD-21	0	0	2	1	0	0	7	24	0	0	3	1	0	0	2	1	2	1	2	2	4	0	2	1	0	1	3	0	2	4	2	2
77	Bacteria	NA	Firmicutes	Bacilli	Bacillales	Bacillaceae	Bacillus	Bacillus sp. SG-1	2	0	0	1	1	3	8	11	0	0	1	21	0	0	1	0	5	11	22	2	15	12	13	1	1	0	13	0	4	3	4	0
78	Bacteria	NA	Proteobacteria	Alphaproteobacteria	Rickettsiales	Anaplasmataceae	Wolbachia	Wolbachia endosymbiont of Drosophila melanogaster	0	0	0	0	0	0	0	0	0	0	0	0	0	0	0	0	8	0	0	0	6	0	0	0	0	0	0	0	0	0	0	0
79	Bacteria	NA	Actinobacteria	Actinobacteria	Actinomycetales	Mycobacteriaceae	Mycobacterium	Mycobacterium tuberculosis	1	3	0	0	1	0	0	0	0	0	0	0	0	0	0	0	3	0	0	0	0	0	4	0	2	0	0	0	0	0	0	0
80	Bacteria	NA	Actinobacteria	Actinobacteria	Actinomycetales	Mycobacteriaceae	Mycobacterium	Mycobacterium sp. JLS	1	103	13	11	9	15	75	17	48	1	2	17	0	18	4	1	8	12	9	5	17	12	13	1	10	7	34	3	15	6	5	1
81	Bacteria	NA	Cyanobacteria	NA	Chroococcales	NA	Crocosphaera	Crocosphaera watsonii	0	0	0	0	0	0	2	2	0	0	0	0	0	0	0	0	3	6	28	0	19	17	17	0	0	0	5	0	0	5	1	1
82	Bacteria	NA	Cyanobacteria	NA	Prochlorales	Prochlorococcaceae	Prochlorococcus	Prochlorococcus marinus	0	0	0	0	0	0	0	0	0	0	0	0	0	0	0	0	0	0	0	0	1	0	0	0	0	0	0	0	0	0	0	0
83	Bacteria	NA	Cyanobacteria	NA	Prochlorales	Prochlorococcaceae	Prochlorococcus	Prochlorococcus marinus	0	0	0	0	0	0	0	0	0	0	1	1	0	0	0	0	0	0	0	0	1	0	1	0	0	0	0	0	0	0	0	0
84	Bacteria	NA	Cyanobacteria	NA	Prochlorales	Prochlorococcaceae	Prochlorococcus	Prochlorococcus marinus	0	0	0	0	0	1	0	0	0	0	0	0	0	0	0	0	0	0	0	0	0	0	0	0	0	0	0	0	0	0	0	0
85	Bacteria	NA	Cyanobacteria	NA	Prochlorales	Prochlorococcaceae	Prochlorococcus	Prochlorococcus marinus	0	0	0	0	0	1	0	0	0	0	0	0	0	0	0	0	0	0	0	0	0	0	0	0	0	0	0	0	0	0	0	0
86	Bacteria	NA	Proteobacteria	Gammaproteobacteria	Alteromonadales	Colwelliaceae	Colwellia	Colwellia psychrerythraea	0	0	4	1	3	1	9	1	0	0	1	4	3	0	1	3	11	10	10	3	17	0	5	0	1	0	52	1	51	13	8	1
87	Viruses	NA	NA	NA	NA	Retroviridae	Gammaretrovirus	Porcine type-C oncovirus	0	0	0	0	0	0	0	0	0	0	0	0	0	0	0	0	0	0	0	0	0	0	1	0	0	5	0	0	0	0	0	0
88	Eukaryota	Fungi	Basidiomycota	NA	Pucciniales	Phakopsoraceae	Phakopsora	Phakopsora pachyrhizi	0	0	0	0	0	0	1	0	0	0	0	0	0	0	0	0	0	0	0	0	0	0	0	0	0	0	1	0	0	0	0	0
89	Viruses	NA	NA	NA	Caudovirales	Siphoviridae	NA	Temperate phage phiNIH1.1	0	0	0	0	0	0	0	0	0	0	0	0	0	0	0	0	0	0	0	0	1	0	0	0	0	0	0	0	0	0	0	0
90	Viruses	NA	NA	NA	NA	Caulimoviridae	Soymovirus	Cestrum yellow leaf curling virus	0	0	0	0	1	0	0	0	0	0	0	0	0	0	0	0	0	0	0	0	0	0	0	0	0	0	0	0	0	0	0	0
91	Bacteria	NA	Firmicutes	Bacilli	Bacillales	Staphylococcaceae	Staphylococcus	Staphylococcus epidermidis	7	39	104	42	34	0	131	790	29	0	46	346	28	91	20	12	139	428	79	131	219	241	20	46	128	21	577	153	354	79	79	33
92	Bacteria	NA	Proteobacteria	Alphaproteobacteria	Rhizobiales	Rhizobiaceae	Agrobacterium	Agrobacterium fabrum	0	5	2	12	1	3	3	8	7	3	27	1	1	1	8	0	6	19	4	57	6	1	11	2	6	3	5	12	10	15	5	12
93	Bacteria	NA	Proteobacteria	Deltaproteobacteria	Desulfobacterales	Desulfobacteraceae	Desulfobacterium	Desulfobacterium autotrophicum	0	0	0	0	0	0	0	2	0	0	0	0	0	0	0	0	2	2	3	0	2	2	0	1	0	0	0	0	0	2	1	0
94	Bacteria	NA	Proteobacteria	Deltaproteobacteria	Desulfobacterales	Desulfobulbaceae	Desulfotalea	Desulfotalea psychrophila	2	0	0	0	1	1	0	1	1	0	0	0	0	0	0	0	0	0	7	0	3	1	2	0	2	0	1	0	1	2	0	1
95	Archaea	NA	Crenarchaeota	Thermoprotei	Thermoproteales	Thermoproteaceae	Pyrobaculum	Pyrobaculum aerophilum	0	0	0	0	0	0	1	0	0	0	0	1	0	0	0	0	1	0	0	0	0	2	0	0	0	0	0	1	0	0	0	0
96	Viruses	NA	NA	NA	Herpesvirales	Alloherpesviridae	Cyprinivirus	Cyprinid herpesvirus 3	0	0	0	0	1	0	0	1	0	0	0	0	0	0	0	0	0	0	0	0	0	0	0	0	0	0	0	1	0	1	1	0
97	Bacteria	NA	Cyanobacteria	NA	Chroococcales	NA	Cyanobium	Cyanobium sp. PCC 7001	0	0	0	1	0	0	3	1	0	0	0	1	1	0	0	0	2	0	3	1	2	1	3	0	1	0	1	1	3	3	0	0
98	Bacteria	NA	Proteobacteria	Gammaproteobacteria	Chromatiales	Ectothiorhodospiraceae	Alkalilimnicola	Alkalilimnicola ehrlichii	0	1	0	1	0	0	5	2	1	0	1	3	0	1	0	1	1	2	6	3	4	1	5	4	3	0	4	0	6	3	1	0
99	Archaea	NA	Euryarchaeota	Methanomicrobia	Methanosarcinales	Methanosarcinaceae	Methanosarcina	Methanosarcina acetivorans	0	0	0	0	0	0	0	0	0	0	0	0	0	0	0	0	0	0	2	0	0	0	0	0	0	0	0	0	0	0	0	0
100	Bacteria	NA	Fusobacteria	Fusobacteriia	Fusobacteriales	Fusobacteriaceae	Fusobacterium	Fusobacterium nucleatum	199	1361	33	288	9787	5852	2402	869	2896	413	346	729	662	33	29	1588	10767	19390	21114	3920	7897	14982	4167	3836	1985	23	11536	1487	8288	33432	8251	18813
101	Bacteria	NA	Proteobacteria	Gammaproteobacteria	Xanthomonadales	Xanthomonadaceae	Xanthomonas	Xanthomonas citri	34	2	1	1	0	3	3	3	0	1	7	3	0	3	0	0	3	11	0	13	0	2	0	1	4	1	4	2	1	1	4	1
102	Bacteria	NA	Proteobacteria	Epsilonproteobacteria	Campylobacterales	Campylobacteraceae	Campylobacter	Campylobacter jejuni	0	0	0	0	0	0	1	0	0	0	0	0	0	0	0	0	0	0	0	0	1	0	0	0	0	0	0	0	1	0	0	0
103	Archaea	NA	Euryarchaeota	Methanomicrobia	Methanosarcinales	Methanosarcinaceae	Methanosarcina	Methanosarcina mazei	0	0	0	0	0	0	0	0	0	0	0	1	0	0	0	0	1	0	0	0	0	0	0	0	0	0	0	0	1	1	0	0
104	Bacteria	NA	Chlorobi	Chlorobia	Chlorobiales	Chlorobiaceae	Chlorobaculum	Chlorobaculum tepidum	0	1	0	0	2	0	1	0	0	0	1	4	1	0	0	0	3	8	11	0	12	2	12	0	3	0	1	0	8	5	2	1
105	Bacteria	NA	Proteobacteria	Epsilonproteobacteria	Campylobacterales	Campylobacteraceae	Campylobacter	Campylobacter jejuni	0	0	0	0	0	1	0	0	0	1	0	0	0	0	0	0	0	0	0	0	2	0	0	0	0	0	0	1	0	1	0	0
106	Bacteria	NA	Firmicutes	Clostridia	Clostridiales	Clostridiaceae	Clostridium	Clostridium perfringens	0	0	0	3	1	3	0	0	0	0	0	8	0	0	0	1	17	32	0	1	39	0	4	2	3	0	24	0	5	14	1	0
107	Bacteria	NA	Firmicutes	Clostridia	Clostridiales	Clostridiaceae	Clostridium	Clostridium perfringens	0	0	0	0	0	0	2	0	0	2	0	1	0	0	0	0	0	1	21	1	4	21	0	0	0	1	1	0	1	8	0	5
108	Bacteria	NA	Actinobacteria	Actinobacteria	Actinomycetales	Nocardioidaceae	Nocardioides	Nocardioides sp. JS614	1	19	3	28	13	47	299	44	31	1	8	41	9	7	3	1	18	59	72	10	44	52	28	7	70	5	13	3	12	19	8	3
109	Bacteria	NA	Actinobacteria	Actinobacteria	Actinomycetales	Corynebacteriaceae	Corynebacterium	Corynebacterium efficiens	1	29	1	15	5	21	221	8	40	1	3	25	1	5	0	0	17	47	45	10	18	68	53	8	48	11	4	2	16	16	8	0
110	Bacteria	NA	Proteobacteria	Gammaproteobacteria	Vibrionales	Vibrionaceae	Vibrio	Vibrio vulnificus	0	0	4	0	2	1	8	1	0	0	0	3	2	2	1	0	18	17	2	0	27	2	2	1	3	0	62	8	53	1	1	4
111	Bacteria	NA	Cyanobacteria	NA	Chroococcales	NA	Thermosynechococcus	Thermosynechococcus elongatus	0	0	0	0	0	0	2	0	0	0	0	2	2	0	0	0	0	1	0	1	0	0	2	0	0	0	0	0	1	0	1	0
112	Viruses	NA	NA	NA	NA	NA	NA	Streptococcus pyogenes phage 315.1	0	0	0	0	0	0	0	0	0	0	0	0	0	0	0	0	5	0	0	2	5	2	2	0	0	0	2	0	12	0	0	0
113	Viruses	NA	NA	NA	NA	NA	NA	Streptococcus pyogenes phage 315.3	0	0	0	0	0	0	0	0	0	0	0	0	0	0	0	0	0	0	0	0	0	0	0	0	0	0	0	0	0	0	0	1
114	Viruses	NA	NA	NA	NA	NA	NA	Streptococcus pyogenes phage 315.4	0	0	0	0	0	0	0	0	0	0	0	0	0	0	0	0	0	0	0	0	1	0	0	0	0	0	0	0	0	0	0	0
115	Bacteria	NA	Proteobacteria	Gammaproteobacteria	Enterobacteriales	Enterobacteriaceae	Buchnera	Buchnera aphidicola	0	0	0	0	0	0	0	0	0	0	0	0	0	0	0	0	0	0	0	0	0	0	0	0	0	0	0	0	0	0	0	1
116	Bacteria	NA	Proteobacteria	Gammaproteobacteria	Alteromonadales	Alteromonadaceae	Saccharophagus	Saccharophagus degradans	0	0	0	0	1	2	4	0	0	0	0	1	0	0	0	0	2	2	4	0	10	1	0	0	0	0	7	0	2	1	1	1
117	Bacteria	NA	Cyanobacteria	NA	Oscillatoriales	NA	Trichodesmium	Trichodesmium erythraeum	0	0	0	0	0	0	1	0	0	0	0	0	0	0	0	0	0	1	3	0	2	0	0	0	0	0	0	0	0	0	0	0
118	Bacteria	NA	Actinobacteria	Actinobacteria	Actinomycetales	NA	Tropheryma	Tropheryma whipplei	0	0	0	0	1	6	4	0	1	0	0	0	0	0	0	0	1	1	5	0	0	0	2	0	0	0	0	0	0	0	0	0
119	Bacteria	NA	Proteobacteria	Gammaproteobacteria	Enterobacteriales	Enterobacteriaceae	Candidatus Blochmannia	Candidatus Blochmannia floridanus	0	0	1	0	0	0	0	0	0	0	0	1	0	0	0	0	0	0	1	0	0	1	2	0	0	0	0	0	0	1	0	0
120	Bacteria	NA	Aquificae	Aquificae	Aquificales	Hydrogenothermaceae	Sulfurihydrogenibium	Sulfurihydrogenibium azorense	0	0	0	0	0	0	0	0	0	0	0	0	0	0	0	0	1	0	1	0	0	0	0	0	0	0	0	0	0	1	0	0
121	Bacteria	NA	Acidobacteria	NA	NA	NA	Candidatus Koribacter	Candidatus Koribacter versatilis	1	0	0	0	0	0	4	1	0	0	0	1	0	0	0	1	0	10	4	0	7	1	2	0	1	0	0	1	2	1	3	0
122	Bacteria	NA	Proteobacteria	Betaproteobacteria	Burkholderiales	Oxalobacteraceae	Herminiimonas	Herminiimonas arsenicoxydans	0	0	5	4	0	0	1	3	1	0	4	0	0	5	0	0	2	8	2	5	4	1	2	1	1	1	0	2	1	2	7	1
123	Viruses	NA	NA	NA	Caudovirales	Siphoviridae	NA	Mycobacterium phage Rosebush	1	0	0	1	0	0	0	1	0	0	0	0	0	0	0	0	0	0	0	0	0	0	0	0	0	0	0	0	0	0	0	0
124	Viruses	NA	NA	NA	Caudovirales	Siphoviridae	NA	Mycobacterium phage Corndog	0	0	0	0	0	0	0	0	0	0	0	0	0	0	0	0	0	0	0	0	1	0	0	0	0	0	0	0	0	0	0	0
1173	Bacteria	NA	Proteobacteria	Gammaproteobacteria	Pseudomonadales	Pseudomonadaceae	Pseudomonas	Pseudomonas aeruginosa	2	22	2	18	4	10	12	31	3	6	179	10	3	17	2	0	14	31	33	134	20	27	12	11	3	14	21	15	3	14	9	2
126	Bacteria	NA	Proteobacteria	Alphaproteobacteria	Rickettsiales	Anaplasmataceae	Ehrlichia	Ehrlichia chaffeensis	0	0	0	0	0	0	0	0	0	0	0	0	0	0	1	0	0	0	0	0	0	0	0	0	0	0	0	0	0	0	0	0
614	Bacteria	NA	Proteobacteria	Gammaproteobacteria	Pseudomonadales	Pseudomonadaceae	Pseudomonas	Pseudomonas entomophila	1	3	8	3	2	2	8	7	1	0	119	3	5	5	0	0	6	7	9	150	5	14	1	8	4	7	6	9	1	10	1	5
128	Bacteria	NA	Proteobacteria	Deltaproteobacteria	Desulfovibrionales	Desulfovibrionaceae	Desulfovibrio	Desulfovibrio alaskensis	1	0	0	0	0	4	0	2	1	0	7	1	0	1	0	1	0	1	3	6	4	2	2	0	0	1	2	0	2	0	2	0
129	Viruses	NA	NA	NA	Caudovirales	Myoviridae	NA	Vibrio phage VHML	0	0	0	1	0	0	0	0	0	0	0	0	0	0	0	0	0	0	0	0	0	0	0	0	0	0	0	0	0	0	0	0
130	Bacteria	NA	Proteobacteria	Gammaproteobacteria	Oceanospirillales	Oceanospirillaceae	Bermanella	Bermanella marisrubri	0	0	0	0	0	0	1	0	0	0	0	0	0	0	0	0	0	0	26	0	8	0	0	0	1	0	2	0	0	0	0	0
131	Bacteria	NA	Fusobacteria	Fusobacteriia	Fusobacteriales	Fusobacteriaceae	Fusobacterium	Fusobacterium nucleatum	183	146	5	42	486	573	338	181	227	106	131	57	232	43	13	78	1899	4087	3125	497	1471	3636	686	451	290	163	1867	430	2268	2931	888	1357
132	Bacteria	NA	Tenericutes	Mollicutes	Mycoplasmatales	Mycoplasmataceae	Mycoplasma	Mycoplasma agalactiae	0	0	0	0	2	0	0	0	0	0	0	0	0	0	0	0	0	0	0	0	0	0	0	0	0	0	0	0	2	0	0	1
133	Bacteria	NA	Firmicutes	Bacilli	Lactobacillales	Streptococcaceae	Streptococcus	Streptococcus agalactiae	3	9	20	37	78	89	406	247	27	738	12	582	15	4	46	41	114	305	185	58	620	240	223	55	202	58	432	15	247	62	441	12
134	Bacteria	NA	Proteobacteria	Gammaproteobacteria	Alteromonadales	Shewanellaceae	Shewanella	Shewanella oneidensis	0	1	0	0	0	0	0	0	0	0	0	0	0	0	0	0	0	0	0	1	0	0	0	0	0	0	0	0	0	0	0	0
135	Bacteria	NA	Firmicutes	Clostridia	Clostridiales	Clostridiaceae	Clostridium	Clostridium tetani	0	0	0	0	0	1	2	0	2	0	0	5	0	0	0	1	6	5	15	2	13	5	13	1	6	0	10	0	4	12	1	0
136	Viruses	NA	NA	NA	Caudovirales	Siphoviridae	NA	Lactococcus phage 936 sensu lato	0	0	0	0	0	0	0	0	0	0	0	0	0	0	0	0	0	0	7	0	0	0	0	0	0	0	0	0	0	0	0	0
137	Viruses	NA	NA	NA	Caudovirales	Siphoviridae	NA	Lactococcus phage 936 sensu lato	0	0	0	0	0	0	0	0	0	0	0	0	0	0	0	0	0	0	2	0	0	0	0	0	0	0	0	0	0	0	0	0
138	Eukaryota	Fungi	Basidiomycota	Tremellomycetes	Tremellales	Tremellaceae	Filobasidiella	Cryptococcus neoformans	5	37	37	1	63	81	63	7	23	44	9	9	32	31	34	55	9	3	9	0	4	18	5	25	20	13	21	31	4	31	11	73
139	Bacteria	NA	Planctomycetes	Planctomycetia	Planctomycetales	Planctomycetaceae	Gemmata	Gemmata obscuriglobus	23	13	17	19	11	19	31	20	5	5	7	11	11	9	7	8	5	8	5	20	5	6	5	9	10	9	7	4	1	8	3	5
140	Viruses	NA	NA	NA	Caudovirales	Podoviridae	Epsilon15likevirus	Salmonella phage epsilon15	0	0	0	0	0	0	0	0	0	0	0	0	0	0	0	0	0	0	0	5	0	0	0	0	0	0	0	0	0	0	0	0
141	Bacteria	NA	Bacteroidetes	Flavobacteriia	Flavobacteriales	Flavobacteriaceae	Croceibacter	Croceibacter atlanticus	1	0	0	0	0	0	1	1	0	0	0	3	0	0	0	0	7	2	19	1	13	7	11	0	2	0	6	2	6	8	2	1
142	Bacteria	NA	Proteobacteria	Betaproteobacteria	Burkholderiales	Burkholderiaceae	Burkholderia	Burkholderia cenocepacia	0	7	1	4	0	1	4	1	0	0	2	1	0	7	0	0	1	2	8	16	2	3	13	2	1	3	2	0	13	2	2	2
143	Bacteria	NA	Proteobacteria	Gammaproteobacteria	Enterobacteriales	Enterobacteriaceae	Escherichia	Escherichia coli	37	5	1	0	4	1	0	1	4	14	195	0	26	84	2	5	11	4	2	15	25	0	2	6	71	3	40	18	4	11	0	7
144	Bacteria	NA	Actinobacteria	Actinobacteria	Actinomycetales	Mycobacteriaceae	Mycobacterium	Mycobacterium marinum	0	0	0	1	0	4	37	0	0	0	3	1	8	0	0	0	3	0	9	0	10	1	0	0	5	0	3	0	1	0	1	0
127	Bacteria	NA	Proteobacteria	Gammaproteobacteria	Pseudomonadales	Pseudomonadaceae	Pseudomonas	Pseudomonas fluorescens	82	15	3	10	0	10	5	9	0	0	41904	3	0	5	3	0	15	11	1	50416	2	1	7	3812	4	3582	17	28	10	7	9	0
146	Bacteria	NA	Proteobacteria	Alphaproteobacteria	Rhizobiales	Rhizobiaceae	Rhizobium	Rhizobium leguminosarum	0	0	6	3	1	3	6	0	0	0	6	0	1	2	2	1	2	7	4	12	3	3	3	0	0	3	1	2	7	4	0	2
147	Bacteria	NA	Proteobacteria	Gammaproteobacteria	Enterobacteriales	Enterobacteriaceae	Pectobacterium	Pectobacterium atrosepticum	0	0	3	0	1	0	4	0	2	0	9	7	0	0	1	0	21	9	7	24	9	3	1	3	0	3	15	4	20	0	2	1
148	Bacteria	NA	Firmicutes	Bacilli	Lactobacillales	Streptococcaceae	Streptococcus	Streptococcus uberis	2	2	10	12	20	34	92	106	22	6	5	416	1	0	13	6	147	193	47	28	116	175	103	10	129	17	187	1	184	32	61	7
149	Bacteria	NA	Chlamydiae	Chlamydiia	Chlamydiales	Chlamydiaceae	Chlamydophila	Chlamydophila abortus	0	0	0	0	0	0	0	0	0	0	0	1	0	0	0	0	0	0	0	0	1	0	0	0	0	0	0	0	0	0	1	0
150	Bacteria	NA	Actinobacteria	Actinobacteria	Actinomycetales	Micromonosporaceae	Micromonospora	Micromonospora sp. ATCC 39149	0	5	0	11	2	13	70	9	7	0	3	4	1	4	0	1	3	9	41	5	23	11	8	1	21	4	6	0	7	3	2	0
145	Bacteria	NA	Proteobacteria	Gammaproteobacteria	Pseudomonadales	Pseudomonadaceae	Pseudomonas	Pseudomonas fluorescens	5	68	29	17	5	4	22	2	3	3	672	7	1	33	3	1	20	4	13	770	7	18	8	45	1	34	12	11	10	11	3	13
152	Bacteria	NA	Firmicutes	Bacilli	Lactobacillales	Lactobacillaceae	Lactobacillus	Lactobacillus plantarum	202	0	2	0	0	0	2	22	0	0	0	25	0	0	0	0	0	0	0	0	0	0	0	1	0	1	0	0	0	0	0	0
153	Bacteria	NA	Firmicutes	Bacilli	Bacillales	Bacillaceae	Oceanobacillus	Oceanobacillus iheyensis	0	0	0	0	0	1	1	2	1	0	0	13	1	0	0	0	2	7	10	0	11	4	2	2	0	0	2	0	1	5	3	0
154	Viruses	NA	NA	NA	Caudovirales	Myoviridae	Twortlikevirus	Staphylococcus phage K	0	0	0	0	0	0	0	0	0	0	0	0	0	0	0	0	0	0	0	0	0	0	0	0	0	0	0	1	0	0	0	0
155	Bacteria	NA	Proteobacteria	Gammaproteobacteria	Pasteurellales	Pasteurellaceae	Basfia	Mannheimia succiniciproducens	0	0	57	26	57	64	267	1	15	1	3	679	34	7	66	79	705	501	157	31	600	131	81	1	9	10	1515	161	2518	145	233	160
156	Bacteria	NA	Firmicutes	Bacilli	Bacillales	Bacillaceae	Bacillus	Bacillus cereus	0	0	0	0	0	1	4	12	0	1	0	18	0	0	0	1	5	22	11	3	7	13	10	3	8	0	16	0	14	5	9	0
157	Eukaryota	Viridiplantae	Chlorophyta	Ulvophyceae	Bryopsidales	Bryopsidaceae	Bryopsis	Bryopsis hypnoides	0	0	0	0	0	0	0	0	0	0	0	0	0	0	0	0	0	0	0	0	0	0	0	0	0	0	1	0	0	0	0	0
158	Bacteria	NA	Proteobacteria	Alphaproteobacteria	Rickettsiales	Anaplasmataceae	Neorickettsia	Neorickettsia sennetsu	0	0	0	0	0	0	0	0	0	0	0	0	0	1	0	0	0	0	0	0	0	0	0	0	0	0	0	0	0	0	0	0
698	Bacteria	NA	Proteobacteria	Gammaproteobacteria	Pseudomonadales	Pseudomonadaceae	Pseudomonas	Pseudomonas mendocina	4	14	8	45	3	12	11	14	3	4	75	6	1	16	15	3	15	20	8	112	24	23	11	6	10	4	16	51	32	37	1	3
160	Bacteria	NA	Aquificae	Aquificae	Aquificales	Aquificaceae	Aquifex	Aquifex aeolicus	0	0	0	0	0	0	0	0	0	0	0	0	0	0	0	0	0	0	0	0	0	0	0	0	0	0	1	0	0	0	0	0
161	Archaea	NA	Euryarchaeota	Archaeoglobi	Archaeoglobales	Archaeoglobaceae	Archaeoglobus	Archaeoglobus fulgidus	0	0	0	0	0	0	0	0	0	0	0	0	0	0	0	0	0	0	0	0	1	0	0	0	0	0	0	0	0	0	0	0
162	Bacteria	NA	Proteobacteria	Alphaproteobacteria	Rhizobiales	Bradyrhizobiaceae	Bradyrhizobium	Bradyrhizobium diazoefficiens	7	8	41	10	1	6	16	23	7	1	25	10	11	12	5	6	3	19	12	30	7	52	13	5	12	3	55	30	5	11	17	4
163	Bacteria	NA	Proteobacteria	Gammaproteobacteria	Enterobacteriales	Enterobacteriaceae	Buchnera	Buchnera aphidicola	0	0	0	0	0	0	0	0	0	0	0	0	0	0	0	0	0	0	0	0	0	1	0	0	1	0	0	0	0	0	0	0
164	Bacteria	NA	Proteobacteria	Gammaproteobacteria	Alteromonadales	Shewanellaceae	Shewanella	Shewanella piezotolerans	0	0	0	0	0	2	1	0	0	0	0	6	0	0	0	0	0	7	10	0	3	5	3	0	1	0	5	0	11	1	2	0
165	Bacteria	NA	Firmicutes	Bacilli	Lactobacillales	Enterococcaceae	Enterococcus	Enterococcus faecalis	1	28	10	28	45	27	279	669	32	63	66	926	37	4	3	22	233	752	361	282	26	619	158	244	218	8	783	4	544	3	269	6
166	Bacteria	NA	Bacteroidetes	Bacteroidia	Bacteroidales	Bacteroidaceae	Bacteroides	Bacteroides thetaiotaomicron	7	5	0	38	10	8	44	31	22	3	0	125	8	1	0	8	162	113	2261	1	1845	703	220	39	39	20	178	9	117	759	297	12
167	Bacteria	NA	Firmicutes	Bacilli	Bacillales	Bacillaceae	Bacillus	Bacillus cereus	0	0	0	0	0	0	1	4	0	0	0	9	0	0	0	0	0	0	0	0	2	1	4	0	1	0	0	0	0	0	0	0
168	Eukaryota	NA	NA	NA	NA	NA	Bigelowiella	Bigelowiella natans	0	1	1	0	0	0	0	1	0	0	0	0	0	0	0	0	0	0	0	0	0	1	0	0	0	0	0	0	0	0	0	0
169	Eukaryota	Fungi	Ascomycota	Eurotiomycetes	Eurotiales	Aspergillaceae	Aspergillus	Aspergillus nidulans	12	7	6	11	14	16	14	8	3	2	1	1	3	4	1	3	2	3	1	5	2	3	1	9	8	8	4	5	0	1	2	1
170	Viruses	NA	NA	NA	Caudovirales	Podoviridae	T7likevirus	Yersinia phage phiA1122	0	0	0	0	0	0	0	0	1	0	0	0	0	0	0	0	0	0	0	0	0	0	0	0	0	0	0	0	0	0	0	0
171	Bacteria	NA	Actinobacteria	Actinobacteria	Actinomycetales	Streptomycetaceae	Streptomyces	Streptomyces avermitilis	7	19	1	13	10	73	87	16	16	1	3	28	0	1	0	2	12	179	48	10	113	24	52	3	211	31	9	3	11	19	8	2
172	Bacteria	NA	Proteobacteria	Gammaproteobacteria	Pasteurellales	Pasteurellaceae	Actinobacillus	Actinobacillus pleuropneumoniae	2166	1530	1642	1920	2063	1248	2611	1829	957	701	670	713	1275	1037	797	1277	628	375	273	1656	729	415	394	853	846	694	814	705	1556	1102	725	865
173	Bacteria	NA	Proteobacteria	Gammaproteobacteria	Pasteurellales	Pasteurellaceae	Histophilus	Histophilus somni	6	5	60	35	77	62	237	9	7	11	1	470	63	7	47	236	1259	848	529	58	1411	858	274	28	76	181	2851	150	3466	351	629	193
174	Bacteria	NA	Proteobacteria	Alphaproteobacteria	Rhodobacterales	Hyphomonadaceae	Hyphomonas	Hyphomonas neptunium	0	0	2	1	0	0	2	0	0	1	1	0	1	1	0	0	1	4	5	2	0	1	1	0	0	1	3	0	2	2	0	0
175	Bacteria	NA	Proteobacteria	Betaproteobacteria	Nitrosomonadales	Nitrosomonadaceae	Nitrosomonas	Nitrosomonas europaea	0	4	6	1	1	0	0	1	0	0	7	2	1	7	0	1	0	2	1	3	0	1	0	1	0	0	0	2	0	0	0	0
176	Bacteria	NA	Proteobacteria	Gammaproteobacteria	Enterobacteriales	Enterobacteriaceae	Yersinia	Yersinia pestis	0	0	0	0	0	0	0	0	0	0	1	0	0	0	0	0	0	0	0	0	6	0	0	0	0	0	0	0	0	0	0	4
177	Eukaryota	Fungi	Ascomycota	Sordariomycetes	Hypocreales	Nectriaceae	Fusarium	Fusarium graminearum	1	0	8	2	1	3	8	3	1	0	1	1	1	0	2	0	0	2	1	2	2	1	7	3	2	1	0	1	3	3	0	0
178	Viruses	NA	NA	NA	Caudovirales	Myoviridae	NA	Haemophilus phage Aaphi23	0	0	0	1	20	2	11	1	0	1	0	1	2	0	0	1	10	0	21	1	14	0	0	0	0	0	11	2	1	0	0	1
179	Bacteria	NA	Proteobacteria	Betaproteobacteria	Burkholderiales	Comamonadaceae	Acidovorax	Acidovorax sp. JS42	227	376	929	501	110	96	347	730	120	72	1380	271	285	891	267	127	254	651	72	1063	71	272	271	229	398	142	1396	817	304	313	114	137
180	Bacteria	NA	Proteobacteria	Gammaproteobacteria	Pasteurellales	Pasteurellaceae	Haemophilus	Haemophilus ducreyi	0	0	28	8	22	21	78	0	9	2	0	71	36	21	46	170	645	170	91	10	515	71	55	2	10	0	1170	222	1154	76	117	53
181	Viruses	NA	NA	NA	Caudovirales	Myoviridae	T4likevirus	Aeromonas phage 25	0	0	0	0	0	0	0	0	0	0	0	0	0	0	0	0	0	0	0	0	0	0	0	0	0	0	1	1	0	0	0	0
182	Bacteria	NA	Acidobacteria	Solibacteres	Solibacterales	Solibacteraceae	Candidatus Solibacter	Candidatus Solibacter usitatus	1	0	0	0	0	0	1	1	1	0	2	2	0	1	0	0	2	0	6	1	2	4	3	0	4	0	0	0	2	0	0	0
183	Bacteria	NA	Proteobacteria	Epsilonproteobacteria	Campylobacterales	Helicobacteraceae	Helicobacter	Helicobacter hepaticus	0	0	0	1	0	0	0	1	0	0	0	0	0	0	0	0	0	2	1	0	12	2	2	0	0	0	1	0	0	0	0	0
184	Bacteria	NA	Firmicutes	Bacilli	Bacillales	Bacillaceae	Geobacillus	Geobacillus kaustophilus	8	0	5	0	0	0	0	0	0	2	0	0	0	1	1	0	0	0	1	2	0	8	0	0	2	0	0	0	0	1	0	0
185	Bacteria	NA	Proteobacteria	Gammaproteobacteria	Oceanospirillales	Alcanivoracaceae	Alcanivorax	Alcanivorax sp. DG881	0	0	0	0	0	0	3	1	0	0	0	2	0	0	0	1	1	1	3	2	4	0	0	1	2	0	2	1	1	1	0	0
186	Eukaryota	Fungi	Ascomycota	Saccharomycetes	Saccharomycetales	NA	Candida	Candida albicans	5	0	13	0	0	0	42	41	0	0	0	374	0	0	0	0	0	0	1	0	0	0	0	0	26	0	0	2	0	0	0	0
187	Bacteria	NA	Acidobacteria	Acidobacteriia	Acidobacteriales	Acidobacteriaceae	Acidobacterium	Acidobacterium capsulatum	0	0	0	0	0	0	4	1	0	1	2	0	0	1	0	0	4	5	8	1	7	4	3	0	3	3	4	1	2	1	1	1
188	Bacteria	NA	Verrucomicrobia	Verrucomicrobiae	Verrucomicrobiales	Verrucomicrobiaceae	Verrucomicrobium	Verrucomicrobium spinosum	0	2	0	0	0	0	1	0	0	0	0	2	0	0	0	2	0	5	5	1	4	1	1	0	0	0	13	0	6	3	0	0
189	Bacteria	NA	Cyanobacteria	NA	Nostocales	Nostocaceae	Anabaena	Anabaena variabilis	0	0	1	0	0	1	0	1	0	0	0	0	0	0	0	0	0	0	2	0	0	0	0	1	0	0	1	0	1	2	0	0
190	Bacteria	NA	Planctomycetes	Planctomycetia	Planctomycetales	Planctomycetaceae	Rhodopirellula	Rhodopirellula baltica	0	0	0	0	0	0	0	0	0	0	0	0	0	0	0	0	1	0	1	0	4	0	1	0	1	0	0	0	1	0	1	0
191	Bacteria	NA	Proteobacteria	Gammaproteobacteria	Acidithiobacillales	Acidithiobacillaceae	Acidithiobacillus	Acidithiobacillus ferrooxidans	0	0	1	0	0	0	5	0	0	0	0	0	0	0	0	0	3	0	1	1	1	2	2	0	1	0	1	0	0	0	0	0
192	Bacteria	NA	Chlamydiae	Chlamydiia	Chlamydiales	Chlamydiaceae	Chlamydia	Chlamydia muridarum	0	0	0	0	0	0	0	0	0	0	0	0	0	0	0	0	0	0	1	0	0	0	0	0	0	0	0	0	0	0	0	0
193	Bacteria	NA	Chloroflexi	Dehalococcoidia	Dehalococcoidales	Dehalococcoidaceae	Dehalococcoides	Dehalococcoides mccartyi	0	1	0	3	2	8	8	4	0	0	0	21	0	0	0	0	5	1	11	1	2	120	105	0	3	1	0	0	3	8	17	0
194	Bacteria	NA	Deinococcus-Thermus	Deinococci	Deinococcales	Deinococcaceae	Deinococcus	Deinococcus radiodurans	0	1	5	0	0	1	4	5	0	1	3	5	0	0	3	0	0	3	6	1	3	3	1	0	1	0	3	0	3	2	1	0
195	Bacteria	NA	Proteobacteria	Gammaproteobacteria	Methylococcales	Methylococcaceae	Methylococcus	Methylococcus capsulatus	6	15	13	18	1	1	18	19	0	3	19	15	8	15	9	3	7	24	10	20	24	16	13	5	8	2	51	18	10	13	10	4
196	Bacteria	NA	Actinobacteria	Actinobacteria	Actinomycetales	Mycobacteriaceae	Mycobacterium	Mycobacterium avium	2	11	0	2	3	34	190	16	27	0	2	17	2	3	0	0	9	114	43	6	12	63	33	1	15	0	3	3	2	8	10	4
197	Bacteria	NA	Proteobacteria	Gammaproteobacteria	Enterobacteriales	Enterobacteriaceae	Photorhabdus	Photorhabdus luminescens	1	2	9	4	0	2	3	1	0	0	12	9	5	8	0	7	46	33	3	14	40	4	2	0	2	2	73	5	84	5	14	7
198	Bacteria	NA	Tenericutes	Mollicutes	Mycoplasmatales	Mycoplasmataceae	Mycoplasma	Mycoplasma arthritidis	0	7	0	1	13	14	0	9	0	2	0	3	0	0	0	1	1	13	1	3	2	2	0	0	4	1	8	1	2	0	13	10
199	Bacteria	NA	Spirochaetes	Spirochaetia	Spirochaetales	Spirochaetaceae	Treponema	Treponema denticola	1248	100	0	925	4922	66	2416	846	2547	469	2	49	1774	54	86	897	199	76	3286	3370	8015	907	195	2955	309	18487	4491	147	366	361	476	7617
200	Bacteria	NA	Proteobacteria	Betaproteobacteria	Neisseriales	Neisseriaceae	Chromobacterium	Chromobacterium violaceum	0	1	0	1	7	2	38	4	8	0	12	5	10	0	1	5	7	20	9	7	21	18	6	0	7	0	12	2	5	5	2	5
201	Bacteria	NA	Proteobacteria	Alphaproteobacteria	Rhodobacterales	Rhodobacteraceae	Labrenzia	Labrenzia alexandrii	0	1	0	0	0	1	5	2	0	0	0	2	0	0	0	0	0	2	2	1	0	0	0	0	0	0	1	0	1	0	0	0
202	Bacteria	NA	Firmicutes	Clostridia	Thermoanaerobacterales	Thermoanaerobacteraceae	Carboxydothermus	Carboxydothermus hydrogenoformans	0	0	0	0	0	0	1	0	0	0	0	1	0	0	0	0	0	0	4	0	0	0	0	0	0	0	1	0	0	0	0	1
203	Bacteria	NA	Proteobacteria	Gammaproteobacteria	Cardiobacteriales	Cardiobacteriaceae	Dichelobacter	Dichelobacter nodosus	0	1	0	0	3	0	4	0	0	0	0	1	0	0	0	0	3	3	0	0	6	1	3	1	0	0	7	0	5	0	2	0
204	Bacteria	NA	Actinobacteria	Actinobacteria	Actinomycetales	Mycobacteriaceae	Mycobacterium	Mycobacterium smegmatis	0	6	2	5	4	11	356	35	12	2	2	93	1	3	2	0	28	101	24	27	33	56	133	5	183	23	4	1	3	57	11	2
205	Bacteria	NA	Proteobacteria	Deltaproteobacteria	Myxococcales	Myxococcaceae	Myxococcus	Myxococcus xanthus	1	3	0	1	1	2	14	2	2	0	1	1	1	2	0	0	1	15	14	2	10	4	2	0	2	0	1	1	3	9	1	0
206	Bacteria	NA	Proteobacteria	Alphaproteobacteria	Rhodobacterales	Rhodobacteraceae	Ruegeria	Ruegeria pomeroyi	1	2	0	0	0	1	2	0	0	3	2	0	0	0	0	0	0	0	0	0	0	0	0	1	0	0	0	1	0	0	0	0
207	Bacteria	NA	Actinobacteria	Actinobacteria	Actinomycetales	Nocardiaceae	Nocardia	Nocardia farcinica	3	35	3	15	11	157	146	78	148	0	4	17	1	10	0	0	32	76	99	7	26	44	172	1	84	2	20	1	12	10	11	0
208	Bacteria	NA	Proteobacteria	Gammaproteobacteria	NA	NA	NA	marine gamma proteobacterium HTCC2143	0	0	0	0	0	1	1	0	0	0	1	1	0	0	0	0	1	0	0	0	2	2	1	0	35	0	0	0	1	1	0	0
209	Bacteria	NA	Proteobacteria	Gammaproteobacteria	NA	NA	NA	marine gamma proteobacterium HTCC2148	0	0	0	0	0	0	0	0	0	0	0	0	0	0	0	1	0	1	2	0	1	0	0	0	0	0	0	1	0	0	0	0
210	Bacteria	NA	Proteobacteria	Gammaproteobacteria	NA	NA	NA	marine gamma proteobacterium HTCC2080	0	0	0	0	0	0	0	0	0	0	0	0	0	0	0	0	0	1	0	1	1	0	0	0	0	0	0	0	0	0	0	0
211	Bacteria	NA	Cyanobacteria	Gloeobacteria	Gloeobacterales	NA	Gloeobacter	Gloeobacter violaceus	0	0	0	0	0	1	2	1	0	0	0	0	0	1	0	0	0	5	4	1	10	2	3	0	1	0	0	0	1	6	1	0
212	Bacteria	NA	Proteobacteria	Alphaproteobacteria	Rhodobacterales	Rhodobacteraceae	Oceanicola	Oceanicola batsensis	0	3	1	0	0	0	0	0	1	0	5	0	0	1	1	0	0	1	0	2	1	0	0	1	0	0	0	1	0	0	0	0
213	Bacteria	NA	Proteobacteria	Alphaproteobacteria	Rickettsiales	Anaplasmataceae	Ehrlichia	Ehrlichia ruminantium	0	0	0	0	0	0	0	0	0	0	0	1	0	0	0	0	4	9	1	0	4	0	0	0	35	0	0	0	1	0	0	0
214	Viruses	NA	NA	NA	Caudovirales	Siphoviridae	NA	Klebsiella phage phiKO2	0	0	0	0	0	0	0	0	1	0	0	0	0	0	0	0	0	0	0	0	0	0	0	0	0	0	0	0	0	0	0	0
215	Bacteria	NA	Chloroflexi	Dehalococcoidia	Dehalococcoidales	Dehalococcoidaceae	Dehalococcoides	Dehalococcoides mccartyi	0	0	0	0	0	0	0	0	0	0	1	0	0	0	0	0	0	0	0	0	0	0	0	0	0	0	0	0	0	0	0	0
216	Bacteria	NA	Actinobacteria	Actinobacteria	Actinomycetales	Corynebacteriaceae	Corynebacterium	Corynebacterium diphtheriae	0	139	1	11	30	43	617	65	202	2	5	5	0	179	4	4	88	8	2429	11	281	37	15	2	572	9	5	2	19	14	0	4
217	Bacteria	NA	Proteobacteria	Betaproteobacteria	Burkholderiales	Alcaligenaceae	Bordetella	Bordetella bronchiseptica	0	0	0	3	3	0	2	0	0	0	9	2	1	0	0	0	4	0	1	12	21	7	0	0	0	0	1	6	0	0	1	0
218	Bacteria	NA	Proteobacteria	Betaproteobacteria	Burkholderiales	Alcaligenaceae	Bordetella	Bordetella parapertussis	0	2	1	0	0	1	10	3	0	0	2	0	7	7	0	0	0	9	12	0	0	0	0	0	1	1	16	0	2	0	2	0
219	Bacteria	NA	Proteobacteria	Betaproteobacteria	Burkholderiales	Alcaligenaceae	Bordetella	Bordetella pertussis	5	0	0	0	0	0	28	0	3	0	0	0	0	0	0	0	0	1	0	1	2	0	3	0	2	0	0	1	5	7	0	0
220	Bacteria	NA	Proteobacteria	Alphaproteobacteria	Rickettsiales	Rickettsiaceae	Rickettsia	Rickettsia typhi	0	0	0	0	0	0	0	1	0	0	0	6	0	1	0	0	0	1	1	0	1	0	1	0	1	0	1	0	1	1	0	0
221	Bacteria	NA	Proteobacteria	Gammaproteobacteria	Pseudomonadales	Moraxellaceae	Psychrobacter	Psychrobacter arcticus	0	1	0	1	0	0	0	0	1	0	0	0	0	1	0	0	5	0	0	0	3	0	0	0	0	0	1	0	3	0	0	1
222	Viruses	NA	NA	NA	NA	Ascoviridae	Ascovirus	Heliothis virescens ascovirus 3a	0	0	0	1	0	0	0	0	0	0	0	0	0	0	0	0	0	0	0	0	0	0	0	0	0	0	0	0	0	0	0	0
223	Bacteria	NA	Proteobacteria	Deltaproteobacteria	NA	NA	NA	delta proteobacterium MLMS-1	0	2	0	2	1	0	4	0	0	0	1	0	2	1	0	0	0	2	3	4	1	18	4	0	0	2	0	0	6	2	1	0
224	Bacteria	NA	Firmicutes	Bacilli	Bacillales	NA	Exiguobacterium	Exiguobacterium sibiricum	0	1	0	0	0	0	3	1	1	0	0	6	0	2	0	0	0	3	5	2	5	2	4	0	1	0	6	1	1	4	0	0
225	Bacteria	NA	Proteobacteria	Alphaproteobacteria	Rhizobiales	Brucellaceae	Brucella	Brucella abortus	0	0	0	2	0	0	0	0	0	0	0	0	0	0	0	0	1	4	0	0	4	0	0	0	0	0	1	0	0	0	2	0
226	Bacteria	NA	Tenericutes	Mollicutes	Mycoplasmatales	Mycoplasmataceae	Mycoplasma	Mycoplasma hyopneumoniae	0	0	0	0	0	0	1	0	0	0	0	0	0	0	0	0	0	0	0	0	2	0	0	0	0	0	0	0	1	0	1	0
227	Bacteria	NA	Tenericutes	Mollicutes	Mycoplasmatales	Mycoplasmataceae	Mycoplasma	Mycoplasma synoviae	1	0	0	0	1	0	0	0	0	0	0	0	0	0	0	0	0	0	0	1	0	1	0	1	0	0	0	0	0	0	0	1
228	Bacteria	NA	Deinococcus-Thermus	Deinococci	Thermales	Thermaceae	Thermus	Thermus thermophilus	71	4	4	4	0	2	37	12	2	0	6	1	1	4	5	0	1	7	24	37	2	3	6	4	4	1	24	5	6	4	5	1
229	Archaea	NA	Euryarchaeota	Thermoplasmata	Thermoplasmatales	Picrophilaceae	Picrophilus	Picrophilus torridus	0	0	0	0	0	0	0	0	0	0	0	0	0	0	0	0	0	0	0	0	1	0	0	0	0	0	0	0	0	0	0	0
230	Bacteria	NA	Proteobacteria	Betaproteobacteria	Burkholderiales	Burkholderiaceae	Cupriavidus	Cupriavidus pinatubonensis	1	0	6	4	0	0	7	8	0	2	9	1	0	7	0	0	4	3	4	5	7	6	4	2	3	1	9	4	6	7	3	2
231	Bacteria	NA	Chlamydiae	Chlamydiia	Chlamydiales	Parachlamydiaceae	Candidatus Protochlamydia	Candidatus Protochlamydia amoebophila	0	0	0	2	1	0	0	0	0	0	0	0	0	0	0	0	0	0	0	0	0	1	0	0	0	0	0	0	0	0	0	0
232	Bacteria	NA	Chlamydiae	Chlamydiia	Chlamydiales	Chlamydiaceae	Chlamydophila	Chlamydophila felis	0	0	0	0	1	0	0	0	0	0	0	0	0	0	0	0	0	0	0	0	0	0	0	0	0	0	0	0	0	0	0	1
233	Bacteria	NA	Proteobacteria	Deltaproteobacteria	Bdellovibrionales	Bdellovibrionaceae	Bdellovibrio	Bdellovibrio bacteriovorus	0	0	0	0	0	0	1	0	0	0	0	0	0	0	0	0	1	3	1	0	3	2	1	0	0	0	4	0	1	0	4	0
151	Bacteria	NA	Proteobacteria	Gammaproteobacteria	Pseudomonadales	Pseudomonadaceae	Pseudomonas	Pseudomonas protegens	5	4	0	2	1	2	21	6	0	0	621	3	1	3	0	0	5	9	9	622	13	5	5	44	8	45	14	2	12	3	5	2
235	Bacteria	NA	Bacteroidetes	Bacteroidia	Bacteroidales	Prevotellaceae	Prevotella	Prevotella ruminicola	12	0	2	17	38	19	45	31	5	2	1	346	9	5	3	24	86	225	1062	8	695	274	287	18	37	38	345	9	216	317	184	36
236	Bacteria	NA	Firmicutes	Clostridia	Thermoanaerobacterales	Thermoanaerobacteraceae	Moorella	Moorella thermoacetica	0	1	0	1	0	0	6	0	0	0	0	1	0	1	0	0	1	0	5	1	12	10	13	1	0	2	2	0	0	6	2	0
237	Bacteria	NA	Proteobacteria	Betaproteobacteria	Methylophilales	Methylophilaceae	Methylobacillus	Methylobacillus flagellatus	0	0	1	2	0	0	1	1	0	0	5	0	2	0	1	1	4	1	1	10	0	5	1	1	0	1	6	1	0	0	0	1
238	Bacteria	NA	Tenericutes	Mollicutes	Entomoplasmatales	Entomoplasmataceae	Mesoplasma	Mesoplasma florum	0	0	0	0	1	0	0	3	0	0	0	0	0	0	0	0	1	4	5	0	4	1	1	0	0	0	9	0	1	0	0	0
239	Bacteria	NA	Actinobacteria	Actinobacteria	Rubrobacterales	Rubrobacteraceae	Rubrobacter	Rubrobacter xylanophilus	2	4	0	2	4	1	22	4	6	0	0	1	0	1	0	1	1	3	4	0	4	1	0	1	7	2	1	0	0	2	0	0
240	Bacteria	NA	Proteobacteria	Betaproteobacteria	Burkholderiales	Burkholderiaceae	Cupriavidus	Cupriavidus metallidurans	614	919	1595	1113	247	168	571	1703	93	184	2083	637	57	1534	595	5	576	1487	127	532	1	523	511	366	692	34	1969	2060	35	730	165	126
241	Bacteria	NA	Proteobacteria	Betaproteobacteria	Burkholderiales	Burkholderiaceae	Burkholderia	Burkholderia xenovorans	255	362	535	360	123	9	233	635	199	4	862	14	1962	642	239	1322	249	680	64	1618	226	201	213	135	232	174	5664	805	3734	252	310	570
242	Bacteria	NA	Proteobacteria	Alphaproteobacteria	Rhizobiales	Phyllobacteriaceae	Chelativorans	Chelativorans sp. BNC1	2	2	5	4	0	2	3	3	0	1	4	2	0	6	0	1	0	1	1	3	4	5	3	0	1	1	5	4	1	2	0	0
243	Bacteria	NA	Proteobacteria	Alphaproteobacteria	Rhizobiales	Rhizobiaceae	Sinorhizobium	Sinorhizobium meliloti	2	1	1	3	1	1	3	1	0	0	5	0	1	0	2	3	1	7	4	8	3	5	1	0	6	0	2	1	1	7	3	0
244	Bacteria	NA	Proteobacteria	Alphaproteobacteria	Rhizobiales	Phyllobacteriaceae	Mesorhizobium	Mesorhizobium loti	1	6	8	10	0	0	6	7	0	2	16	1	6	5	1	0	4	17	13	9	13	8	7	1	2	2	5	6	3	18	9	1
245	Bacteria	NA	Actinobacteria	Actinobacteria	Actinomycetales	Kineosporiaceae	Kineococcus	Kineococcus radiotolerans	2	123	6	54	32	164	1042	142	265	5	10	74	6	14	1	4	148	226	438	44	177	543	151	34	163	14	81	3	29	62	81	6
246	Archaea	NA	Euryarchaeota	Methanococci	Methanococcales	Methanococcaceae	Methanococcus	Methanococcus maripaludis	0	0	0	0	0	0	0	0	0	0	0	2	0	0	0	0	0	0	0	0	1	0	0	0	0	0	0	0	0	0	0	0
247	Bacteria	NA	Firmicutes	Bacilli	Bacillales	Listeriaceae	Listeria	Listeria monocytogenes	0	0	0	2	0	0	1	3	0	0	0	4	0	0	0	0	1	1	3	2	2	2	2	4	0	0	3	0	2	0	0	1
248	Bacteria	NA	Proteobacteria	Betaproteobacteria	Burkholderiales	Burkholderiaceae	Ralstonia	Ralstonia solanacearum	14	19	33	31	2	0	52	48	7	6	38	19	9	22	19	15	22	22	4	28	27	37	9	14	20	1	85	40	22	30	14	7
249	Bacteria	NA	Tenericutes	Mollicutes	Mycoplasmatales	Mycoplasmataceae	Mycoplasma	Mycoplasma mobile	0	0	0	0	2	0	0	1	0	0	0	0	0	0	0	0	0	0	0	0	4	0	0	0	0	0	0	0	0	0	0	0
250	Bacteria	NA	Cyanobacteria	NA	Chroococcales	NA	Synechococcus	Synechococcus elongatus	0	0	0	0	0	1	1	0	1	1	0	0	0	0	0	0	2	1	1	0	0	0	2	0	0	0	0	0	2	0	0	1
251	Bacteria	NA	Proteobacteria	Betaproteobacteria	Burkholderiales	Burkholderiaceae	Burkholderia	Burkholderia vietnamiensis	7	11	14	10	0	1	13	5	4	0	171	3	10	25	3	4	8	8	17	121	4	19	52	11	86	20	4	1	4	15	0	0
252	Bacteria	NA	Proteobacteria	Alphaproteobacteria	Rickettsiales	Anaplasmataceae	Ehrlichia	Ehrlichia canis	0	0	0	1	1	0	0	0	0	0	0	0	0	0	0	0	0	0	0	0	2	0	1	0	0	0	0	0	0	0	0	0
253	Bacteria	NA	Proteobacteria	Alphaproteobacteria	Rhodospirillales	Rhodospirillaceae	Rhodospirillum	Rhodospirillum rubrum	2	2	3	4	0	4	11	2	0	1	11	4	4	2	1	1	0	4	10	12	7	7	13	1	6	0	8	3	5	8	1	3
254	Archaea	NA	Euryarchaeota	Methanomicrobia	Methanosarcinales	Methanosarcinaceae	Methanosarcina	Methanosarcina barkeri	1	0	1	0	0	0	0	1	0	0	0	0	0	1	0	0	0	0	1	0	1	0	0	0	0	0	0	0	0	0	0	0
255	Bacteria	NA	Bacteroidetes	Cytophagia	Cytophagales	Cytophagaceae	Cytophaga	Cytophaga hutchinsonii	0	0	0	0	0	0	2	1	1	0	0	0	0	0	0	3	1	7	19	1	12	2	17	1	0	1	24	0	6	2	2	1
256	Bacteria	NA	Proteobacteria	Deltaproteobacteria	Desulfuromonadales	Geobacteraceae	Geobacter	Geobacter metallireducens	1	1	0	0	1	1	1	0	0	0	0	4	0	0	0	0	0	5	4	1	7	2	6	0	0	0	12	0	0	6	0	0
257	Bacteria	NA	Actinobacteria	Actinobacteria	Actinomycetales	Nocardiopsaceae	Thermobifida	Thermobifida fusca	0	9	1	3	1	17	58	9	13	0	1	17	0	2	0	0	3	33	20	8	13	12	32	2	24	1	9	1	2	4	4	1
258	Bacteria	NA	Firmicutes	Bacilli	Bacillales	Bacillaceae	Bacillus	Bacillus cereus	0	0	0	0	0	0	0	0	0	0	0	2	0	0	0	0	1	0	0	0	0	1	0	0	0	0	2	0	0	0	0	0
259	Bacteria	NA	Proteobacteria	Gammaproteobacteria	Alteromonadales	Alteromonadaceae	Marinobacter	Marinobacter sp. ELB17	0	0	1	1	0	0	2	0	0	0	0	0	0	0	0	0	0	0	1	1	0	0	1	1	0	3	1	0	4	2	0	0
260	Bacteria	NA	Cyanobacteria	NA	Oscillatoriales	NA	Oscillatoria	Oscillatoria sp. PCC 6506	0	0	0	0	1	0	2	0	1	0	0	2	0	0	0	0	1	0	1	0	2	2	0	0	0	0	2	0	1	0	0	0
261	Bacteria	NA	Firmicutes	Bacilli	Bacillales	Bacillaceae	Bacillus	Bacillus halodurans	0	0	0	1	0	0	0	0	0	0	0	3	0	0	0	0	0	6	6	1	2	2	2	0	6	0	3	0	0	2	2	1
262	Bacteria	NA	Firmicutes	Clostridia	Clostridiales	Clostridiaceae	Clostridium	Clostridium acetobutylicum	0	0	0	3	2	0	0	2	1	0	0	13	0	0	0	0	16	8	18	1	7	28	7	1	2	1	19	0	1	4	2	2
263	Bacteria	NA	Proteobacteria	Alphaproteobacteria	Rhodospirillales	Acetobacteraceae	Gluconacetobacter	Gluconacetobacter diazotrophicus	315	975	7115	1671	146	467	217	1093	526	339	15094	640	1327	7951	769	118	1696	6063	129	14617	13	430	1063	1794	3848	1438	342	3977	527	1441	676	459
264	Archaea	NA	Euryarchaeota	Halobacteria	Halobacteriales	Halobacteriaceae	Haloarcula	Haloarcula marismortui	0	0	0	0	0	0	3	0	0	0	0	0	0	0	0	0	0	0	2	3	0	0	0	0	0	0	0	0	0	0	0	0
265	Bacteria	NA	Firmicutes	Bacilli	Lactobacillales	Streptococcaceae	Lactococcus	Lactococcus lactis	16	0	0	30	0	14	15	9	20	1	27	29	0	20	2	0	7	3	591	15	163	974	4	206	32	1	226	5	161	0	45	8
266	Bacteria	NA	Firmicutes	Bacilli	Bacillales	Listeriaceae	Listeria	Listeria innocua	1	0	0	0	5	5	32	11	1	23	1	55	0	1	4	0	8	17	5	3	33	8	1	3	7	0	15	0	15	1	8	2
267	Bacteria	NA	Proteobacteria	Alphaproteobacteria	Rhizobiales	Methylobacteriaceae	Methylobacterium	Methylobacterium extorquens	1	23	20	20	4	4	1	12	0	0	9	2	1	3	0	1	2	2	28	7	22	2	11	0	1	1	42	15	6	16	0	8
268	Bacteria	NA	Actinobacteria	Actinobacteria	Actinomycetales	Mycobacteriaceae	Mycobacterium	Mycobacterium leprae	0	0	0	0	0	0	4	0	0	0	0	0	0	0	0	0	1	2	9	1	3	10	3	0	3	0	0	0	0	3	3	0
269	Bacteria	NA	Tenericutes	Mollicutes	Mycoplasmatales	Mycoplasmataceae	Mycoplasma	Mycoplasma mycoides	0	0	0	0	0	1	1	2	2	0	0	0	0	0	0	0	0	1	0	0	10	0	2	2	0	0	1	0	1	0	0	1
270	Bacteria	NA	Tenericutes	Mollicutes	Mycoplasmatales	Mycoplasmataceae	Mycoplasma	Mycoplasma penetrans	0	0	0	0	0	0	0	0	0	0	0	0	0	0	0	0	3	0	0	1	0	0	0	0	0	0	0	0	4	0	0	0
271	Bacteria	NA	Tenericutes	Mollicutes	Mycoplasmatales	Mycoplasmataceae	Mycoplasma	Mycoplasma pneumoniae	0	0	0	0	0	0	0	0	0	0	0	0	0	0	0	0	0	4	15	0	7	7	0	0	0	0	0	0	0	0	0	0
272	Bacteria	NA	Tenericutes	Mollicutes	Mycoplasmatales	Mycoplasmataceae	Mycoplasma	Mycoplasma pulmonis	0	1	0	0	0	1	0	0	0	0	0	0	0	0	0	0	0	0	1	0	6	0	0	0	0	0	3	0	0	1	0	0
273	Bacteria	NA	Proteobacteria	Gammaproteobacteria	Pasteurellales	Pasteurellaceae	Pasteurella	Pasteurella multocida	0	1	194	139	124	155	979	6	52	6	4	374	125	6	129	350	3507	1311	632	97	3527	155	275	2	43	4	16862	215	16281	467	1789	550
274	Bacteria	NA	Proteobacteria	Alphaproteobacteria	Rhodobacterales	Rhodobacteraceae	Rhodobacter	Rhodobacter capsulatus	16	27	5	78	2	5	4	11	3	11	59	2	1	2	2	0	5	5	1	37	4	5	6	3	3	4	12	4	6	8	0	1
275	Bacteria	NA	Proteobacteria	Alphaproteobacteria	Rhodobacterales	Rhodobacteraceae	Rhodobacter	Rhodobacter sphaeroides	0	0	0	0	0	0	0	2	0	0	0	0	0	0	0	0	0	0	0	1	0	0	0	0	0	0	0	0	0	0	0	0
276	Bacteria	NA	Proteobacteria	Alphaproteobacteria	Rickettsiales	Rickettsiaceae	Rickettsia	Rickettsia prowazekii	0	0	0	0	0	0	1	0	0	0	0	0	0	0	0	0	0	0	14	0	3	1	0	0	0	0	0	0	0	0	0	0
277	Archaea	NA	Crenarchaeota	Thermoprotei	Sulfolobales	Sulfolobaceae	Sulfolobus	Sulfolobus solfataricus	0	0	0	0	0	0	0	0	0	0	0	0	0	0	0	1	0	0	0	0	0	0	0	0	0	0	0	0	0	0	0	0
278	Archaea	NA	Crenarchaeota	Thermoprotei	Sulfolobales	Sulfolobaceae	Sulfolobus	Sulfolobus tokodaii	0	0	0	0	1	0	0	0	0	0	0	0	0	0	0	0	0	0	0	0	0	0	0	0	0	0	0	0	0	0	0	0
279	Bacteria	NA	Firmicutes	Clostridia	Thermoanaerobacterales	Thermoanaerobacteraceae	Caldanaerobacter	Caldanaerobacter subterraneus	1	0	0	0	0	1	0	0	0	0	0	2	1	0	0	0	0	1	1	0	2	0	1	3	0	0	0	0	1	0	0	0
280	Bacteria	NA	Proteobacteria	Epsilonproteobacteria	Campylobacterales	Helicobacteraceae	Wolinella	Wolinella succinogenes	1	0	0	0	2	0	0	1	0	0	0	0	0	0	0	2	0	1	16	0	16	0	2	0	0	0	4	0	5	4	3	4
281	Bacteria	NA	Proteobacteria	Gammaproteobacteria	Enterobacteriales	Enterobacteriaceae	Yersinia	Yersinia pseudotuberculosis	0	1	2	3	3	0	8	0	1	0	0	8	1	1	1	4	21	21	8	5	21	4	3	0	0	0	69	3	29	4	3	0
282	Eukaryota	Fungi	Ascomycota	Sordariomycetes	Glomerellales	Plectosphaerellaceae	Verticillium	Verticillium dahliae	0	0	0	0	0	0	0	0	0	0	1	0	0	0	0	0	0	0	0	0	0	0	0	0	0	0	0	0	0	0	0	0
283	Eukaryota	Fungi	Ascomycota	Saccharomycetes	Saccharomycetales	NA	Candida	Candida orthopsilosis	1	0	0	0	0	0	0	6	0	0	0	2	0	0	0	0	0	0	0	0	0	0	0	0	1	0	0	0	0	0	0	0
284	Eukaryota	Fungi	Ascomycota	Saccharomycetes	Saccharomycetales	NA	Candida	Candida metapsilosis	0	0	0	0	0	0	0	0	0	0	0	1	0	0	1	0	0	0	0	0	0	0	0	0	0	0	0	0	0	0	0	0
285	Eukaryota	NA	NA	Glaucocystophyceae	NA	Cyanophoraceae	Cyanophora	Cyanophora paradoxa	0	0	1	0	0	0	0	0	0	0	0	0	0	0	0	0	0	0	0	0	0	1	0	2	4	0	8	0	0	0	0	0
286	Bacteria	NA	Firmicutes	Bacilli	Lactobacillales	Lactobacillaceae	Pediococcus	Pediococcus pentosaceus	4	1	1	0	1	0	4	10	0	0	0	11	0	0	0	0	5	15	5	3	35	19	15	6	14	0	9	0	7	6	13	0
287	Eukaryota	NA	NA	Bangiophyceae	Bangiales	Bangiaceae	Porphyra	Porphyra purpurea	0	0	1	0	0	0	0	0	0	0	0	0	0	0	0	0	0	0	1	0	0	0	1	0	0	0	0	0	0	0	0	0
288	Eukaryota	NA	NA	Bangiophyceae	Bangiales	Bangiaceae	Pyropia	Pyropia yezoensis	0	0	0	0	0	0	0	0	0	0	0	0	0	0	0	0	0	0	0	1	1	0	0	0	0	0	0	0	0	0	0	0
289	Bacteria	NA	Firmicutes	Bacilli	Bacillales	Bacillaceae	Bacillus	Bacillus licheniformis	2	0	0	1	0	1	0	2	0	0	0	4	0	1	0	0	4	3	4	3	12	5	2	0	0	2	6	1	2	2	1	2
290	Bacteria	NA	Proteobacteria	Alphaproteobacteria	Sphingomonadales	Sphingomonadaceae	Novosphingobium	Novosphingobium aromaticivorans	1	4	4	10	2	6	26	524	0	1	12	5	1	14	2	1	1	8	9	1	8	15	3	1	2	1	3	14	11	33	8	2
291	Viruses	NA	NA	NA	Caudovirales	Podoviridae	Bppunalikevirus	Burkholderia phage BcepC6B	0	0	0	0	0	0	0	0	0	0	2	0	0	0	0	0	0	0	0	0	0	0	0	0	0	0	0	0	0	0	0	0
292	Viruses	NA	NA	NA	Caudovirales	Siphoviridae	NA	Lactobacillus phage Lc-Nu	1	0	0	0	0	0	0	0	0	0	0	0	0	0	0	0	0	0	0	0	0	0	0	0	1	0	0	0	0	0	0	0
293	Bacteria	NA	Proteobacteria	Betaproteobacteria	Neisseriales	Neisseriaceae	Pseudogulbenkiania	Pseudogulbenkiania ferrooxidans	3	6	5	7	3	1	20	19	6	1	13	6	6	11	5	6	15	24	12	6	12	19	18	3	5	0	31	13	7	13	3	4
294	Bacteria	NA	Firmicutes	Bacilli	Bacillales	Staphylococcaceae	Staphylococcus	Staphylococcus haemolyticus	1	5	7	4	1	1	14	14	1	1	1	118	1	1	1	2	36	87	11	5	56	13	14	2	16	2	46	23	59	20	28	5
295	Eukaryota	NA	NA	Bangiophyceae	Cyanidiales	Cyanidiaceae	Cyanidioschyzon	Cyanidioschyzon merolae	0	0	0	0	0	0	0	0	0	0	0	0	0	0	0	0	0	0	0	0	1	0	0	0	0	0	1	0	0	0	0	0
296	Viruses	NA	NA	NA	Caudovirales	Podoviridae	NA	Pseudomonas phage F116	0	0	0	1	0	0	0	0	0	0	0	0	0	0	0	0	0	0	0	0	0	0	0	0	0	0	0	0	0	0	0	0
297	Bacteria	NA	Actinobacteria	Actinobacteria	Actinomycetales	Microbacteriaceae	Leifsonia	Leifsonia xyli	0	23	1	12	4	19	127	21	25	0	2	26	1	2	0	2	8	38	41	10	41	27	32	2	45	5	8	0	1	5	6	0
298	Bacteria	NA	Proteobacteria	Deltaproteobacteria	Desulfuromonadales	Desulfuromonadaceae	Desulfuromonas	Desulfuromonas acetoxidans	0	0	0	0	1	0	0	1	0	0	0	0	0	0	0	0	0	1	7	1	1	0	12	0	11	0	1	0	2	1	0	0
299	Viruses	NA	NA	NA	NA	Adenoviridae	Mastadenovirus	Human adenovirus C	0	0	0	0	0	0	0	0	0	0	0	0	0	0	0	0	0	0	0	0	0	0	0	0	0	0	0	0	0	1	0	0
300	Eukaryota	NA	NA	Raphidophyceae	Chattonellales	Chattonellaceae	Heterosigma	Heterosigma akashiwo	0	0	0	0	0	0	0	0	0	0	0	0	0	0	0	0	0	1	2	1	1	1	0	0	0	0	1	0	0	1	0	0
301	Bacteria	NA	Proteobacteria	Alphaproteobacteria	Rhizobiales	Bartonellaceae	Bartonella	Bartonella quintana	0	0	0	0	0	0	0	2	0	0	0	0	0	0	0	0	0	0	0	0	0	0	0	0	0	0	0	0	0	2	0	0
302	Bacteria	NA	Proteobacteria	Alphaproteobacteria	Rhizobiales	Bartonellaceae	Bartonella	Bartonella henselae	1	0	0	0	0	0	0	0	0	0	0	0	0	0	0	0	0	1	0	0	0	0	0	1	0	0	0	0	1	0	0	0
303	Eukaryota	Fungi	Basidiomycota	Tremellomycetes	Tremellales	Tremellaceae	Filobasidiella	Cryptococcus neoformans	5	37	37	458	63	81	64	7	23	46	9	9	32	31	35	55	9	3	9	370	4	18	5	25	20	13	21	31	6	31	11	73
304	Eukaryota	NA	Bacillariophyta	Mediophyceae	Eupodiscales	Eupodiscaceae	Odontella	Odontella sinensis	0	0	0	0	0	0	0	1	3	1	0	0	0	0	0	0	0	0	0	0	6	0	0	0	0	0	3	1	0	1	0	0
305	Bacteria	NA	Proteobacteria	Gammaproteobacteria	Alteromonadales	Idiomarinaceae	Idiomarina	Idiomarina loihiensis	0	0	0	0	0	0	0	0	1	0	1	0	1	0	0	1	1	0	3	0	4	1	0	0	1	0	6	1	3	2	2	0
306	Eukaryota	Fungi	Ascomycota	Saccharomycetes	Saccharomycetales	Saccharomycetaceae	Kluyveromyces	Kluyveromyces lactis	1	1	0	0	0	0	0	1	0	0	0	1	0	0	0	0	2	0	0	1	0	0	0	1	0	0	1	0	0	3	0	0
307	Eukaryota	Fungi	Ascomycota	Saccharomycetes	Saccharomycetales	Dipodascaceae	Yarrowia	Yarrowia lipolytica	1	0	0	0	0	1	0	0	0	0	0	0	0	0	1	0	2	3	3	0	7	15	1	0	0	0	4	0	3	2	0	0
308	Eukaryota	Fungi	Ascomycota	Saccharomycetes	Saccharomycetales	Debaryomycetaceae	Debaryomyces	Debaryomyces hansenii	0	3	0	0	0	0	0	0	0	0	5	0	0	2	0	0	0	13	0	1	2	2	1	0	2	0	0	0	1	3	0	8
309	Eukaryota	Fungi	Ascomycota	Saccharomycetes	Saccharomycetales	Saccharomycetaceae	Nakaseomyces	Candida glabrata	6657	3	0	0	0	0	0	0	0	0	351	1	0	0	0	1	0	0	0	9	3	0	2	1	0	22	3	0	1	1	1	0
310	Eukaryota	Fungi	Ascomycota	Saccharomycetes	Saccharomycetales	Saccharomycetaceae	Eremothecium	Eremothecium gossypii	5	3	5	1	3	3	5	4	2	4	0	2	5	1	1	2	1	1	76	5	1	1	0	1	1	1	1	0	1	612	1	0
311	Eukaryota	Fungi	Ascomycota	Schizosaccharomycetes	Schizosaccharomycetales	Schizosaccharomycetaceae	Schizosaccharomyces	Schizosaccharomyces pombe	86	46	50	56	56	32	94	96	28	20	20	18	42	33	25	35	13	7	11	63	32	15	8	53	33	20	9	31	14	24	22	31
312	Eukaryota	NA	NA	Florideophyceae	Gracilariales	Gracilariaceae	Gracilaria	Gracilaria tenuistipitata	0	0	0	0	0	0	0	0	0	0	0	0	0	0	0	0	0	0	0	0	0	4	0	0	0	0	1	0	0	0	0	0
313	Eukaryota	NA	Phaeophyceae	NA	Ectocarpales	Ectocarpaceae	Ectocarpus	Ectocarpus siliculosus	0	0	0	0	0	0	0	0	0	0	0	0	0	0	0	0	0	0	0	1	1	1	0	0	0	0	0	0	0	0	0	0
314	Bacteria	NA	Proteobacteria	Alphaproteobacteria	Rhizobiales	Bradyrhizobiaceae	Bradyrhizobium	Bradyrhizobium sp. BTAi1	0	9	26	11	4	2	10	1	1	4	8	0	11	21	1	0	7	10	13	13	4	1	17	2	8	4	9	15	23	7	2	1
315	Bacteria	NA	Firmicutes	Bacilli	Bacillales	Bacillaceae	Bacillus	Bacillus cereus	1	0	0	0	0	0	1	6	0	0	0	6	0	1	0	0	5	7	1	1	14	7	1	1	5	0	19	0	6	0	4	0
316	Bacteria	NA	Actinobacteria	Actinobacteria	Actinomycetales	Micrococcaceae	Renibacterium	Renibacterium salmoninarum	0	0	0	3	0	1	7	3	6	0	0	2	0	1	0	1	4	21	9	2	7	22	31	0	22	3	1	0	3	6	2	0
317	Bacteria	NA	Nitrospirae	Nitrospira	Nitrospirales	Nitrospiraceae	Thermodesulfovibrio	Thermodesulfovibrio yellowstonii	0	1	0	0	0	0	0	0	0	1	0	0	0	1	0	0	0	0	0	0	0	0	0	1	0	0	0	0	1	1	0	1
318	Eukaryota	NA	NA	NA	Isochrysidales	Noelaerhabdaceae	Emiliania	Emiliania huxleyi	0	0	0	0	0	0	0	0	0	0	0	1	0	0	0	0	0	0	0	0	0	0	0	0	0	0	0	0	0	0	0	0
319	Bacteria	NA	Chlorobi	Chlorobia	Chlorobiales	Chlorobiaceae	Chlorobium	Chlorobium limicola	0	0	0	0	0	0	1	0	0	0	0	0	1	0	0	0	0	3	6	0	10	1	0	0	1	0	13	0	5	2	1	0
320	Bacteria	NA	Chlorobi	Chlorobia	Chlorobiales	Chlorobiaceae	Chlorobium	Chlorobium phaeobacteroides	0	0	0	0	0	0	0	0	0	0	1	0	0	0	0	0	0	1	0	0	2	0	4	0	0	0	9	0	1	0	3	0
321	Bacteria	NA	Chlorobi	Chlorobia	Chlorobiales	Chlorobiaceae	Chlorobium	Chlorobium phaeovibrioides	0	0	0	0	0	0	0	0	0	0	0	0	0	0	0	1	0	1	0	0	0	0	0	0	0	0	0	0	0	0	0	0
322	Bacteria	NA	Proteobacteria	Gammaproteobacteria	Enterobacteriales	Enterobacteriaceae	Citrobacter	Citrobacter koseri	0	4	1	2	1	0	0	6	0	0	188	0	0	4	1	0	5	9	3	251	12	4	0	39	2	77	14	3	22	4	1	119
323	Bacteria	NA	Proteobacteria	Gammaproteobacteria	Enterobacteriales	Enterobacteriaceae	Cronobacter	Cronobacter sakazakii	0	0	0	2	3	2	3	1	2	0	130	3	0	1	0	0	4	5	3	248	8	2	2	18	0	28	5	4	9	6	1	4
324	Bacteria	NA	Actinobacteria	Actinobacteria	Actinomycetales	Micrococcaceae	Arthrobacter	Arthrobacter aurescens	0	20	3	5	4	3	36	32	5	2	3	60	2	10	0	1	11	37	33	17	33	62	131	5	112	9	27	1	15	19	10	0
325	Bacteria	NA	Proteobacteria	Gammaproteobacteria	Oceanospirillales	Halomonadaceae	Chromohalobacter	Chromohalobacter salexigens	2	14	20	26	0	20	14	11	9	1	50	4	3	18	6	1	3	51	9	14	3	8	9	3	0	0	2	6	7	2	1	0
326	Bacteria	NA	Actinobacteria	Actinobacteria	Actinomycetales	Micrococcaceae	Arthrobacter	Arthrobacter sp. FB24	1	16	3	4	5	24	189	38	12	4	6	131	1	8	0	4	29	91	64	41	48	120	132	2	194	34	27	1	21	38	19	5
327	Bacteria	NA	Proteobacteria	Alphaproteobacteria	Rhodobacterales	Rhodobacteraceae	Jannaschia	Jannaschia sp. CCS1	1	4	0	5	2	1	1	1	1	0	5	2	0	0	1	1	3	1	3	5	9	0	5	0	1	1	1	1	2	0	1	1
328	Bacteria	NA	Firmicutes	Clostridia	Clostridiales	Clostridiaceae	Clostridium	Clostridium beijerinckii	0	2	0	2	0	0	3	1	1	2	0	11	1	0	1	4	16	44	25	1	40	21	20	1	7	0	12	0	7	3	10	4
329	Bacteria	NA	Spirochaetes	Spirochaetia	Spirochaetales	Spirochaetaceae	Borrelia	Borrelia bavariensis	0	0	0	0	0	0	0	0	0	0	0	0	0	0	0	0	1	0	0	0	0	0	0	0	0	0	0	0	0	2	0	0
330	Bacteria	NA	Chlorobi	Chlorobia	Chlorobiales	Chlorobiaceae	Prosthecochloris	Prosthecochloris aestuarii	0	0	0	0	0	0	2	0	0	0	0	0	0	0	1	0	3	0	2	0	8	0	1	0	0	0	4	0	1	1	3	0
331	Bacteria	NA	Proteobacteria	Alphaproteobacteria	Rhodospirillales	Acetobacteraceae	Gluconobacter	Gluconobacter oxydans	2	20	164	31	6	16	3	20	14	9	273	23	25	115	11	3	50	194	1	470	2	15	36	47	110	39	13	120	8	40	25	22
332	Bacteria	NA	Proteobacteria	Epsilonproteobacteria	Campylobacterales	Helicobacteraceae	Helicobacter	Helicobacter pylori	0	0	0	0	0	0	0	0	0	0	0	0	0	0	0	0	0	0	0	0	0	0	0	0	0	0	0	2	0	0	0	0
333	Bacteria	NA	Proteobacteria	Gammaproteobacteria	Enterobacteriales	Enterobacteriaceae	Photorhabdus	Photorhabdus asymbiotica	0	0	0	2	3	1	11	1	1	0	1	23	1	0	0	6	20	16	6	0	7	2	5	0	1	0	48	4	108	8	11	3
334	Bacteria	NA	Proteobacteria	Gammaproteobacteria	Enterobacteriales	Enterobacteriaceae	Candidatus Blochmannia	Candidatus Blochmannia pennsylvanicus	0	0	0	0	0	0	0	0	0	0	0	0	0	0	0	1	0	0	1	0	1	0	0	0	0	0	2	0	2	0	0	0
335	Eukaryota	Fungi	Ascomycota	Sordariomycetes	Hypocreales	Cordycipitaceae	Lecanicillium	Lecanicillium muscarium	0	0	0	0	0	0	0	0	0	0	0	0	0	0	0	0	0	0	0	0	0	1	0	0	0	0	0	2	0	0	0	0
336	Viruses	NA	NA	NA	Caudovirales	Myoviridae	Twortlikevirus	Staphylococcus phage G1	0	0	0	0	0	0	0	0	0	0	0	0	0	0	0	0	0	0	0	0	0	0	0	0	0	0	0	1	0	0	0	0
337	Bacteria	NA	Proteobacteria	Alphaproteobacteria	Rhodobacterales	Rhodobacteraceae	Ruegeria	Ruegeria sp. TM1040	0	0	0	0	0	0	0	1	0	0	0	0	0	0	0	0	0	0	0	0	0	0	0	0	1	0	0	0	0	0	0	0
338	Bacteria	NA	Proteobacteria	Betaproteobacteria	Hydrogenophilales	Hydrogenophilaceae	Thiobacillus	Thiobacillus denitrificans	0	0	0	1	0	0	7	2	1	1	2	0	0	0	0	1	0	11	2	3	7	6	13	1	3	0	0	0	2	2	3	0
339	Bacteria	NA	Firmicutes	Clostridia	Clostridiales	Clostridiales Family XVIII. Incertae Sedis	Symbiobacterium	Symbiobacterium thermophilum	1	1	1	0	0	5	10	4	1	0	1	2	0	0	0	0	9	9	22	1	19	5	14	2	7	0	4	0	1	12	4	0
340	Bacteria	NA	Proteobacteria	Alphaproteobacteria	Rickettsiales	Anaplasmataceae	Wolbachia	Wolbachia endosymbiont of Brugia malayi	0	0	0	0	0	0	0	0	0	0	0	0	0	0	0	0	1	0	0	0	1	0	0	0	0	0	3	0	0	0	0	0
341	Bacteria	NA	Proteobacteria	Alphaproteobacteria	Rickettsiales	Rickettsiaceae	Rickettsia	Rickettsia canadensis	0	0	0	0	0	0	0	0	0	0	0	1	0	0	1	0	0	0	0	0	0	0	0	0	0	0	0	0	0	0	0	0
342	Bacteria	NA	Firmicutes	Clostridia	Clostridiales	Clostridiaceae	Alkaliphilus	Alkaliphilus metalliredigens	4	1	3	4	2	5	3	17	0	0	0	34	0	1	1	1	11	28	10	3	61	34	20	2	11	0	52	0	17	9	19	0
343	Bacteria	NA	Proteobacteria	Gammaproteobacteria	Enterobacteriales	Enterobacteriaceae	Salmonella	Salmonella enterica	0	0	0	0	0	0	0	0	0	0	2	0	0	0	0	0	0	0	0	13	0	2	0	1	0	2	0	0	0	2	1	0
344	Bacteria	NA	Bacteroidetes	Bacteroidia	Bacteroidales	Bacteroidaceae	Bacteroides	Bacteroides fragilis	0	0	0	257	1	119	62	115	148	2	1	687	38	9	21	73	149	5096	2670	0	2062	528	697	20	144	8	2258	110	1700	371	2215	13
345	Eukaryota	NA	Bacillariophyta	Coscinodiscophyceae	NA	Thalassiosiraceae	Thalassiosira	Thalassiosira pseudonana	107	44	70	68	71	58	98	66	32	19	20	25	35	9	4	41	10	4	7	43	26	11	13	31	33	24	18	15	21	39	16	18
346	Eukaryota	Viridiplantae	Chlorophyta	Mamiellophyceae	Mamiellales	NA	Micromonas	Micromonas sp. RCC299	229	34	767	196	36	14	142	168	117	13	32	61	22	18	23	18	27	11	51	81	135	18	15	90	245	53	486	53	66	58	59	65
347	Bacteria	NA	Proteobacteria	Betaproteobacteria	Burkholderiales	Comamonadaceae	Polaromonas	Polaromonas sp. JS666	22	45	42	48	13	6	45	68	6	4	51	31	26	75	26	14	30	44	11	42	18	39	27	14	22	2	161	78	45	25	13	25
348	Bacteria	NA	Proteobacteria	Gammaproteobacteria	Vibrionales	Vibrionaceae	Photobacterium	Photobacterium profundum	0	0	4	1	3	1	9	1	0	0	0	12	2	1	1	5	27	21	25	2	38	28	7	2	3	1	62	0	60	5	6	4
349	Bacteria	NA	Actinobacteria	Actinobacteria	Actinomycetales	Frankiaceae	Frankia	Frankia sp. EAN1pec	2	8	0	7	3	15	88	12	21	0	2	7	0	2	1	2	11	22	18	6	5	13	7	1	9	0	5	0	0	9	6	1
350	Bacteria	NA	Proteobacteria	Gammaproteobacteria	Enterobacteriales	Enterobacteriaceae	Shigella	Shigella sonnei	140	25	156	104	38	41	85	323	10	36	267	95	127	273	60	57	3	164	1	365	3	95	122	1	3	3	564	183	148	182	27	137
351	Eukaryota	NA	Euglenida	NA	Euglenales	Euglenaceae	Euglena	Euglena gracilis	0	0	0	0	0	0	0	0	0	0	0	0	0	0	0	0	0	0	0	0	0	0	0	0	0	0	1	0	0	0	0	0
352	Archaea	NA	Euryarchaeota	Methanomicrobia	Methanocellales	Methanocellaceae	Methanocella	Methanocella paludicola	0	0	0	1	0	0	0	1	0	0	0	0	0	0	0	0	0	0	1	2	2	0	0	0	0	0	0	0	0	0	0	0
353	Eukaryota	Viridiplantae	Chlorophyta	Chlorophyceae	Chlamydomonadales	Chlamydomonadaceae	Chlamydomonas	Chlamydomonas reinhardtii	0	0	0	0	0	0	0	0	0	0	0	0	0	0	0	0	0	0	0	0	0	2	0	0	0	0	0	0	1	0	0	1
354	Bacteria	NA	Proteobacteria	Epsilonproteobacteria	Campylobacterales	Campylobacteraceae	Campylobacter	Campylobacter coli	0	0	0	2	0	0	0	4	0	0	0	6	0	0	0	1	17	11	60	0	24	3	67	1	9	1	15	0	10	3	11	4
355	Bacteria	NA	Proteobacteria	Epsilonproteobacteria	Campylobacterales	Campylobacteraceae	Campylobacter	Campylobacter lari	0	1	0	0	3	0	1	0	0	0	0	3	0	0	0	0	5	1	2	0	7	1	0	0	0	0	2	1	1	3	1	3
356	Bacteria	NA	Proteobacteria	Epsilonproteobacteria	Campylobacterales	Campylobacteraceae	Campylobacter	Campylobacter upsaliensis	0	0	0	0	6	0	0	0	0	1	0	0	0	0	0	0	0	0	0	0	6	2	0	0	0	0	0	0	0	1	0	0
357	Viruses	NA	NA	NA	Caudovirales	Siphoviridae	NA	Streptococcus phage 2972	0	0	0	0	0	1	0	1	0	1	0	64	0	0	0	0	0	0	1	0	0	0	1	0	0	1	23	0	0	8	0	0
358	Eukaryota	Fungi	Ascomycota	Sordariomycetes	Sordariales	Chaetomiaceae	Chaetomium	Chaetomium globosum	60	20	24	23	31	23	44	55	124	6	14	13	15	13	13	16	2	2	8	26	4	8	3	14	9	5	7	12	10	16	10	9
359	Eukaryota	Viridiplantae	Chlorophyta	Trebouxiophyceae	Chlorellales	NA	Parachlorella	Parachlorella kessleri	1	0	0	0	0	0	0	1	0	0	0	0	0	0	0	0	0	0	1	2	0	0	0	0	0	0	0	0	0	0	0	0
360	Bacteria	NA	Proteobacteria	Alphaproteobacteria	Rickettsiales	Anaplasmataceae	Wolbachia	Wolbachia endosymbiont of Drosophila ananassae	0	0	0	0	0	0	0	0	0	0	0	0	0	0	0	0	0	0	0	0	0	0	0	0	0	0	0	0	0	0	0	1
361	Eukaryota	Viridiplantae	Chlorophyta	Trebouxiophyceae	Chlorellales	Chlorellaceae	Chlorella	Chlorella vulgaris	0	0	5	0	0	0	0	1	0	0	0	1	1	1	0	0	0	0	10	1	3	8	2	0	0	0	1	0	0	3	0	1
362	Eukaryota	Viridiplantae	Chlorophyta	Chlorophyceae	Sphaeropleales	Scenedesmaceae	Acutodesmus	Acutodesmus obliquus	0	0	0	1	0	0	0	0	0	0	0	0	0	0	0	0	0	1	0	0	0	0	0	0	0	1	0	0	0	0	0	1
363	Bacteria	NA	Firmicutes	Clostridia	Thermoanaerobacterales	Thermodesulfobiaceae	Coprothermobacter	Coprothermobacter proteolyticus	0	0	0	0	0	0	0	0	0	1	0	1	0	0	0	0	5	0	0	0	5	2	0	0	0	0	1	0	1	1	0	2
364	Bacteria	NA	Dictyoglomi	Dictyoglomia	Dictyoglomales	Dictyoglomaceae	Dictyoglomus	Dictyoglomus thermophilum	0	0	0	0	0	0	0	0	0	0	0	0	0	0	0	0	0	0	0	0	1	0	0	0	0	0	2	0	1	1	0	0
365	Archaea	NA	Euryarchaeota	Halobacteria	Halobacteriales	Halobacteriaceae	Haloferax	Haloferax volcanii	0	0	0	0	0	0	2	0	0	0	0	0	0	0	0	0	1	0	5	1	0	1	1	1	0	0	1	0	0	0	0	0
366	Bacteria	NA	Chloroflexi	Thermomicrobia	Thermomicrobiales	Thermomicrobiaceae	Thermomicrobium	Thermomicrobium roseum	0	0	0	0	0	0	1	0	0	0	0	0	0	1	0	1	0	0	1	1	1	4	2	0	2	0	0	0	0	1	0	0
367	Bacteria	NA	Thermotogae	Thermotogae	Thermotogales	Thermotogaceae	Thermotoga	Thermotoga neapolitana	0	0	0	0	0	0	0	0	0	0	0	0	0	0	0	0	0	0	0	0	0	0	1	0	0	0	0	0	0	2	0	0
368	Bacteria	NA	Bacteroidetes	NA	Bacteroidetes Order II. Incertae sedis	Rhodothermaceae	Salinibacter	Salinibacter ruber	0	2	0	0	0	0	1	0	0	0	0	0	0	0	1	0	0	5	15	0	20	6	4	0	3	0	3	0	0	2	7	0
369	Bacteria	NA	Chloroflexi	Dehalococcoidia	Dehalococcoidales	Dehalococcoidaceae	Dehalococcoides	Dehalococcoides mccartyi	0	0	0	0	0	0	0	0	0	0	0	0	0	0	0	0	0	0	1	0	0	1	0	0	0	0	0	0	0	0	0	0
370	Bacteria	NA	Proteobacteria	Betaproteobacteria	Burkholderiales	Burkholderiaceae	Polynucleobacter	Polynucleobacter necessarius	0	0	1	1	0	0	1	0	1	0	0	5	1	2	0	0	13	4	1	0	8	1	1	0	0	0	3	5	17	20	0	0
371	Eukaryota	Viridiplantae	Chlorophyta	Nephroselmidophyceae	NA	NA	Nephroselmis	Nephroselmis olivacea	0	0	0	0	0	0	0	1	0	0	0	0	0	0	0	0	0	0	0	12	0	3	1	0	0	1	0	0	0	0	0	0
372	Bacteria	NA	Bacteroidetes	Flavobacteriia	Flavobacteriales	Flavobacteriaceae	Robiginitalea	Robiginitalea biformata	0	2	0	0	0	0	3	0	0	0	0	0	0	0	0	1	2	4	2	0	4	0	4	0	1	2	9	2	5	4	2	1
373	Bacteria	NA	Bacteroidetes	Cytophagia	Cytophagales	Cytophagaceae	Microscilla	Microscilla marina	0	0	0	1	1	0	1	1	0	0	0	1	1	0	0	4	8	8	17	0	4	1	2	1	1	0	11	0	10	4	3	0
374	Bacteria	NA	Cyanobacteria	NA	Oscillatoriales	NA	Lyngbya	Lyngbya sp. PCC 8106	0	0	0	0	0	0	0	0	0	0	0	0	0	0	0	0	0	0	0	0	0	0	1	0	0	0	0	0	0	0	0	0
375	Bacteria	NA	Cyanobacteria	NA	Nostocales	Nostocaceae	Nodularia	Nodularia spumigena	0	0	0	0	1	0	0	0	0	0	0	1	0	0	0	0	2	3	2	0	1	0	0	0	0	0	0	0	1	3	0	0
376	Bacteria	NA	Firmicutes	Bacilli	Bacillales	Bacillaceae	Bacillus	Bacillus sp. NRRL B-14911	0	0	0	0	0	0	0	5	0	2	0	6	1	0	0	9	2	7	0	1	1	4	0	1	1	0	4	0	4	1	5	0
377	Bacteria	NA	Lentisphaerae	Lentisphaeria	Lentisphaerales	Lentisphaeraceae	Lentisphaera	Lentisphaera araneosa	0	0	0	1	0	0	0	2	0	0	0	3	0	0	0	0	0	2	8	0	4	2	1	0	0	0	1	0	0	2	0	1
378	Bacteria	NA	Proteobacteria	Alphaproteobacteria	Sphingomonadales	Erythrobacteraceae	Erythrobacter	Erythrobacter litoralis	0	0	4	3	1	1	2	20	2	0	3	1	0	1	1	0	0	3	5	5	0	1	2	2	1	0	10	0	0	6	0	1
379	Bacteria	NA	Planctomycetes	Planctomycetia	Planctomycetales	Planctomycetaceae	Blastopirellula	Blastopirellula marina	0	0	0	0	0	0	0	0	0	0	0	0	0	0	0	0	0	0	0	1	0	0	0	0	0	0	1	0	0	0	0	0
380	Bacteria	NA	Proteobacteria	Alphaproteobacteria	Rhizobiales	Bradyrhizobiaceae	Nitrobacter	Nitrobacter sp. Nb-311A	0	0	0	0	0	0	1	0	0	0	1	0	0	1	0	0	0	1	0	0	0	0	0	0	0	0	0	0	0	0	1	0
381	Bacteria	NA	Proteobacteria	Alphaproteobacteria	Rhodobacterales	Hyphomonadaceae	Oceanicaulis	Oceanicaulis sp. HTCC2633	0	3	0	1	0	0	4	15	0	0	1	1	1	8	5	3	0	3	0	0	0	1	1	0	1	0	10	4	0	4	0	0
382	Bacteria	NA	Proteobacteria	Alphaproteobacteria	Rhodobacterales	Rhodobacteraceae	Roseobacter	Roseobacter sp. MED193	0	0	0	3	0	0	0	0	0	2	0	0	0	0	0	0	0	0	0	0	0	0	0	0	0	0	0	0	0	0	0	0
383	Bacteria	NA	Proteobacteria	Alphaproteobacteria	Sphingomonadales	Sphingomonadaceae	Sphingomonas	Sphingomonas sp. SKA58	0	0	0	0	0	0	0	8	0	0	0	0	0	0	0	0	0	0	0	0	0	0	0	0	0	0	0	0	0	0	0	0
384	Bacteria	NA	Proteobacteria	Alphaproteobacteria	Rhodobacterales	Rhodobacteraceae	Sulfitobacter	Sulfitobacter sp. NAS-14.1	0	0	2	1	0	0	0	0	0	1	0	0	0	0	0	0	0	0	1	1	0	0	0	0	0	0	0	0	0	0	0	0
385	Bacteria	NA	Proteobacteria	Alphaproteobacteria	Rhodobacterales	Rhodobacteraceae	NA	Rhodobacteraceae bacterium HTCC2083	0	0	0	0	0	0	0	1	0	0	0	0	0	0	0	0	0	0	2	0	8	1	0	0	0	0	0	0	0	3	1	0
386	Bacteria	NA	Proteobacteria	Alphaproteobacteria	Rhodobacterales	Rhodobacteraceae	Maritimibacter	Maritimibacter alkaliphilus	1	0	0	1	1	0	0	0	0	0	0	0	0	0	0	0	0	0	0	0	0	0	0	0	0	0	0	0	0	0	0	0
387	Bacteria	NA	Proteobacteria	Gammaproteobacteria	Alteromonadales	Idiomarinaceae	Idiomarina	Idiomarina baltica	0	0	0	0	0	0	2	0	0	0	0	0	0	0	0	0	0	0	0	0	0	0	0	0	0	0	0	0	0	0	0	0
388	Bacteria	NA	Proteobacteria	Gammaproteobacteria	Vibrionales	Vibrionaceae	Photobacterium	Photobacterium profundum	0	0	0	0	0	0	1	0	0	0	0	0	0	0	0	0	0	0	0	0	1	0	0	0	0	0	1	0	0	0	1	0
389	Bacteria	NA	Proteobacteria	Gammaproteobacteria	NA	NA	NA	gamma proteobacterium HTCC2207	0	0	0	0	0	0	2	0	0	0	0	4	0	0	0	2	2	3	8	1	5	3	2	0	1	0	0	0	3	2	2	0
390	Bacteria	NA	Proteobacteria	Gammaproteobacteria	Vibrionales	Vibrionaceae	Vibrio	Vibrio alginolyticus	0	0	0	0	1	0	0	0	0	0	0	0	0	0	0	0	0	0	0	0	0	0	0	0	0	0	0	0	0	0	0	0
391	Bacteria	NA	Proteobacteria	Gammaproteobacteria	Vibrionales	Vibrionaceae	Vibrio	Vibrio sp. AND4	0	0	7	0	0	1	0	0	0	0	0	0	2	0	0	1	9	4	0	1	6	2	0	0	0	0	19	0	24	1	0	0
392	Bacteria	NA	Proteobacteria	Gammaproteobacteria	Vibrionales	Vibrionaceae	Vibrio	Vibrio splendidus	0	0	0	0	0	0	0	0	0	0	0	0	0	0	0	0	0	0	0	0	1	0	0	0	0	0	0	0	0	0	0	0
393	Bacteria	NA	Proteobacteria	Gammaproteobacteria	Vibrionales	Vibrionaceae	Photobacterium	Photobacterium angustum	0	0	5	2	5	2	9	0	2	0	0	9	0	0	4	5	43	23	7	0	34	9	6	0	1	0	115	2	88	2	7	9
394	Bacteria	NA	Firmicutes	Bacilli	Lactobacillales	Lactobacillaceae	Lactobacillus	Lactobacillus sakei	5	20	1	10	8	7	368	524	41	6	2	816	2	20	5	66	202	483	14	3	741	255	113	12	141	0	739	2	547	15	296	4
395	Bacteria	NA	Proteobacteria	Gammaproteobacteria	Xanthomonadales	Xanthomonadaceae	Xanthomonas	Xanthomonas campestris	3565	27	43	24	8	28	47	35	10	14	24	8	4	11	10	26	87	22	21	9	4	38	11	9	17	1	31	12	15	19	6	0
396	Bacteria	NA	Proteobacteria	Betaproteobacteria	NA	NA	NA	beta proteobacterium KB13	0	0	0	0	0	0	0	0	0	0	0	0	0	0	0	0	0	0	1	0	1	0	0	0	0	0	1	0	0	2	0	2
397	Bacteria	NA	Proteobacteria	Gammaproteobacteria	Alteromonadales	Shewanellaceae	Shewanella	Shewanella benthica	0	0	0	0	0	0	2	0	0	0	0	0	0	0	0	0	1	2	0	0	1	0	0	1	0	0	2	1	1	0	0	0
398	Viruses	NA	NA	NA	Caudovirales	Siphoviridae	C2likevirus	Lactococcus phage c2	0	0	0	0	0	0	0	0	0	0	1	0	0	0	0	0	0	0	4	0	0	1	0	0	0	0	0	0	0	0	0	0
399	Bacteria	NA	Proteobacteria	Alphaproteobacteria	Rickettsiales	Rickettsiaceae	Rickettsia	Rickettsia felis	0	0	0	0	0	0	0	0	0	0	0	0	0	0	0	0	0	0	1	0	0	0	0	0	0	0	0	0	0	0	0	0
400	Bacteria	NA	Firmicutes	Bacilli	Bacillales	Bacillaceae	Bacillus	Bacillus weihenstephanensis	0	1	0	3	2	2	9	17	0	2	1	35	2	0	0	0	11	17	29	2	29	13	29	1	12	0	86	0	53	9	24	3
401	Bacteria	NA	Firmicutes	Bacilli	Bacillales	Bacillaceae	Bacillus	Bacillus cytotoxicus	0	0	1	1	1	1	7	23	2	1	1	37	0	2	2	0	9	21	24	4	27	16	11	3	6	0	21	1	10	4	7	3
402	Bacteria	NA	Proteobacteria	Alphaproteobacteria	Rhizobiales	Bradyrhizobiaceae	Rhodopseudomonas	Rhodopseudomonas palustris	0	0	6	6	1	0	8	2	0	3	4	0	0	1	2	0	2	3	7	7	3	6	3	1	3	1	0	2	3	2	3	0
403	Bacteria	NA	Proteobacteria	Alphaproteobacteria	Rhizobiales	Bradyrhizobiaceae	Rhodopseudomonas	Rhodopseudomonas palustris	3	1	2	2	0	1	1	4	2	0	12	0	1	7	1	1	0	6	0	2	2	4	5	0	1	0	10	0	2	1	1	0
404	Bacteria	NA	Proteobacteria	Alphaproteobacteria	Rhizobiales	Bradyrhizobiaceae	Rhodopseudomonas	Rhodopseudomonas palustris	2	1	4	2	0	2	2	1	4	1	2	1	1	5	0	2	0	2	1	2	1	2	4	1	1	0	4	4	1	3	0	0
405	Bacteria	NA	Proteobacteria	Alphaproteobacteria	Rhizobiales	Bradyrhizobiaceae	Rhodopseudomonas	Rhodopseudomonas palustris	4	9	6	11	2	1	4	18	4	1	31	4	6	7	1	4	9	14	1	21	6	9	6	2	5	2	31	9	2	5	4	3
406	Bacteria	NA	Proteobacteria	Deltaproteobacteria	Desulfuromonadales	Geobacteraceae	Geobacter	Geobacter daltonii	0	0	0	0	0	1	0	0	0	0	0	0	1	0	0	0	1	1	2	0	3	2	1	0	0	0	0	0	0	1	0	0
407	Bacteria	NA	Proteobacteria	Gammaproteobacteria	Xanthomonadales	Xanthomonadaceae	Xanthomonas	Xanthomonas euvesicatoria	14	1	12	2	1	0	6	5	1	1	35	7	0	9	4	0	6	31	3	33	13	24	7	2	2	2	4	7	3	3	2	4
408	Bacteria	NA	Chloroflexi	Chloroflexi	Herpetosiphonales	Herpetosiphonaceae	Herpetosiphon	Herpetosiphon aurantiacus	0	0	1	0	0	0	0	0	1	0	0	0	0	0	0	0	0	3	5	1	3	1	0	0	0	0	7	6	4	4	1	0
409	Bacteria	NA	Cyanobacteria	NA	Chroococcales	NA	Synechococcus	Synechococcus sp. RCC307	0	0	0	0	0	0	0	0	0	0	0	0	0	0	0	0	0	1	1	0	1	1	0	0	0	0	0	0	0	1	0	0
410	Bacteria	NA	Cyanobacteria	NA	Chroococcales	NA	Synechococcus	Synechococcus sp. CC9902	0	0	0	0	0	0	0	0	0	0	0	0	0	0	0	0	0	1	0	0	0	0	0	0	0	0	0	0	0	0	0	0
411	Bacteria	NA	Proteobacteria	Gammaproteobacteria	Thiotrichales	Piscirickettsiaceae	Thiomicrospira	Thiomicrospira crunogena	0	0	0	0	0	1	0	0	0	0	0	1	0	0	0	0	1	2	2	0	1	0	0	0	0	0	2	0	15	1	1	0
412	Viruses	NA	NA	NA	Caudovirales	Siphoviridae	NA	Lactococcus phage BK5-T	0	0	0	0	0	0	0	0	0	0	0	0	0	0	0	0	0	0	1	0	0	0	0	0	0	0	0	0	0	0	0	0
413	Bacteria	NA	Proteobacteria	Alphaproteobacteria	Sphingomonadales	Sphingomonadaceae	Sphingopyxis	Sphingopyxis alaskensis	4	7	6	15	2	1	51	56	2	0	14	4	6	13	1	0	4	40	7	21	3	5	6	3	3	0	9	9	3	4	1	1
414	Bacteria	NA	Proteobacteria	Gammaproteobacteria	Alteromonadales	Shewanellaceae	Shewanella	Shewanella denitrificans	0	1	1	0	0	0	3	0	0	0	11	6	0	0	3	0	18	3	0	12	27	2	0	2	0	1	46	4	15	2	6	2
415	Bacteria	NA	Proteobacteria	Gammaproteobacteria	Alteromonadales	Shewanellaceae	Shewanella	Shewanella frigidimarina	0	0	3	1	0	0	9	0	0	1	0	9	1	0	2	3	26	19	4	3	11	4	8	4	6	1	59	5	113	5	11	3
416	Eukaryota	Fungi	Ascomycota	Dothideomycetes	Pleosporales	Didymellaceae	Leptosphaerulina	Leptosphaerulina australis	0	0	0	0	0	0	0	0	0	0	0	0	0	0	0	0	0	0	0	0	0	0	0	0	0	0	0	0	0	9	0	0
417	Bacteria	NA	Chlorobi	Chlorobia	Chlorobiales	Chlorobiaceae	Pelodictyon	Pelodictyon luteolum	1	1	0	0	0	0	0	0	1	0	0	1	0	0	0	0	1	11	4	0	1	1	2	0	0	0	1	0	2	5	0	0
418	Bacteria	NA	Deinococcus-Thermus	Deinococci	Deinococcales	Deinococcaceae	Deinococcus	Deinococcus geothermalis	0	0	3	1	1	0	3	0	0	0	1	0	0	1	1	0	1	1	4	6	4	3	3	0	2	0	1	1	2	2	4	0
419	Bacteria	NA	Proteobacteria	Betaproteobacteria	Burkholderiales	Burkholderiaceae	Burkholderia	Burkholderia pseudomallei	0	0	0	0	0	0	1	0	0	0	3	1	0	1	1	0	0	1	0	1	0	0	0	0	1	0	0	0	0	1	0	1
420	Bacteria	NA	Proteobacteria	Alphaproteobacteria	Rickettsiales	Anaplasmataceae	Anaplasma	Anaplasma marginale	0	0	0	0	0	0	0	0	0	0	0	0	0	0	0	0	0	0	0	0	0	0	0	0	0	0	0	0	0	0	0	1
421	Bacteria	NA	Cyanobacteria	NA	Chroococcales	NA	Synechococcus	Synechococcus sp. PCC 7002	0	0	0	0	0	1	1	0	0	0	0	1	0	0	0	0	0	0	0	0	2	0	0	0	0	0	0	0	0	0	0	0
422	Bacteria	NA	Cyanobacteria	NA	Chroococcales	NA	Synechococcus	Synechococcus sp. WH 7803	0	0	0	0	0	0	1	1	0	0	0	1	0	0	0	0	0	0	0	0	2	0	1	0	1	0	2	0	0	1	0	0
423	Bacteria	NA	Verrucomicrobia	Verrucomicrobiae	Verrucomicrobiales	Verrucomicrobia subdivision 3	Pedosphaera	Pedosphaera parvula	0	0	0	0	0	0	1	0	1	0	0	0	1	0	0	0	0	0	2	0	0	0	1	0	0	0	0	0	0	0	0	0
424	Viruses	NA	NA	NA	Caudovirales	Siphoviridae	NA	Staphylococcus phage 53 sensu lato	0	0	0	0	0	0	0	0	0	0	0	0	0	0	0	0	0	0	0	0	0	0	0	4	0	0	0	0	0	0	0	0
425	Bacteria	NA	Proteobacteria	Gammaproteobacteria	Enterobacteriales	Enterobacteriaceae	Salmonella	Salmonella enterica	6	0	5	1	0	0	1	0	1	1	43	0	0	0	1	0	0	3	0	98	1	0	0	5	0	11	4	0	4	6	1	4
426	Bacteria	NA	Cyanobacteria	NA	Chroococcales	NA	Synechococcus	Synechococcus sp. JA-3-3Ab	0	0	0	0	0	1	1	0	0	0	0	1	0	1	1	1	1	0	1	0	5	0	1	0	0	0	0	0	1	1	0	0
427	Bacteria	NA	Cyanobacteria	NA	Chroococcales	NA	Synechococcus	Synechococcus sp. JA-2-3B'a(2-13)	0	0	0	1	0	0	0	0	0	0	0	0	0	2	0	0	0	1	3	0	0	1	2	1	2	0	2	0	1	3	1	0
428	Eukaryota	Fungi	Ascomycota	Dothideomycetes	Pleosporales	Phaeosphaeriaceae	Parastagonospora	Parastagonospora nodorum	0	0	0	0	0	0	0	0	0	0	0	1	0	0	0	1	2	0	0	0	0	0	0	0	0	1	0	0	0	1	0	1
429	Bacteria	NA	Actinobacteria	Actinobacteria	Actinomycetales	Brevibacteriaceae	Brevibacterium	Brevibacterium linens	2	25	6	4	1	15	74	30	14	0	10	21	4	10	2	1	26	32	36	18	19	41	34	4	46	3	10	1	4	10	7	1
430	Viruses	NA	NA	NA	NA	Phycodnaviridae	Chlorovirus	Acanthocystis turfacea Chlorella virus 1	74	36	65	24	10	14	2	16	7	5	18	5	5	25	3	0	0	1	0	0	0	1	2	1	5	0	7	13	6	5	0	0
431	Bacteria	NA	Tenericutes	Mollicutes	Acholeplasmatales	Acholeplasmataceae	Candidatus Phytoplasma	Aster yellows witches'-broom phytoplasma	0	1	0	0	0	0	0	0	0	0	0	0	0	0	0	0	0	0	2	0	6	0	0	0	0	0	0	0	0	0	0	0
432	Eukaryota	Fungi	Ascomycota	Saccharomycetes	Saccharomycetales	Debaryomycetaceae	Scheffersomyces	Scheffersomyces stipitis	2	93	0	82	130	88	1	4	37	19	11	1	44	33	42	72	9	12	0	64	55	0	19	10	0	0	1	4	12	36	9	13
433	Bacteria	NA	Firmicutes	Bacilli	Lactobacillales	Streptococcaceae	Streptococcus	Streptococcus thermophilus	2348	871	3856	3573	7146	59651	14205	187446	12397	6536	567	290304	297	248	777	544	19994	13972	15861	6253	13980	50532	11884	26037	36361	28766	41211	151	17533	7790	7311	715
434	Bacteria	NA	Proteobacteria	Gammaproteobacteria	Pseudomonadales	Pseudomonadaceae	Azotobacter	Azotobacter vinelandii	8	16	9	5	3	4	20	7	2	2	39	3	1	2	1	3	4	12	6	30	4	3	1	4	15	3	10	6	15	2	2	1
435	Bacteria	NA	Proteobacteria	Alphaproteobacteria	Rhizobiales	Bradyrhizobiaceae	Nitrobacter	Nitrobacter hamburgensis	0	2	3	3	2	1	0	4	0	0	3	3	2	3	1	0	5	3	2	6	0	3	0	2	7	0	2	1	0	3	0	0
436	Bacteria	NA	Proteobacteria	Alphaproteobacteria	Rhizobiales	Bradyrhizobiaceae	Nitrobacter	Nitrobacter winogradskyi	0	2	0	2	0	0	1	1	1	0	2	0	1	1	1	0	0	0	2	1	0	0	0	1	1	2	5	0	1	0	0	0
437	Bacteria	NA	Proteobacteria	Betaproteobacteria	Nitrosomonadales	Nitrosomonadaceae	Nitrosospira	Nitrosospira multiformis	1	0	1	1	0	0	1	3	1	0	1	8	0	1	0	0	1	0	0	0	2	1	2	1	0	0	3	1	0	1	1	1
438	Bacteria	NA	Proteobacteria	Gammaproteobacteria	Alteromonadales	Shewanellaceae	Shewanella	Shewanella loihica	0	1	8	7	8	0	0	0	2	1	0	35	58	0	8	102	214	135	3	1	7	10	37	0	5	0	396	0	499	31	66	18
439	Bacteria	NA	Chloroflexi	Chloroflexi	Chloroflexales	Chloroflexaceae	Chloroflexus	Chloroflexus aurantiacus	0	0	1	0	0	0	0	0	0	0	0	0	0	0	0	0	0	0	0	0	0	0	0	0	0	0	0	0	0	1	0	0
440	Bacteria	NA	Chlorobi	Chlorobia	Chlorobiales	Chlorobiaceae	Pelodictyon	Pelodictyon phaeoclathratiforme	0	2	0	0	0	0	0	0	0	0	0	0	1	0	0	0	0	0	2	0	3	0	0	0	1	0	0	0	0	0	1	0
441	Viruses	NA	NA	NA	Herpesvirales	Herpesviridae	Roseolovirus	Human herpesvirus 6A	2	0	0	0	1	2	1	1	1	0	0	0	0	0	0	0	1	0	0	1	0	0	0	2	0	0	0	0	0	0	1	0
442	Viruses	NA	NA	NA	Herpesvirales	Herpesviridae	Roseolovirus	Human herpesvirus 6B	17	3	5	6	13	19	15	15	8	0	2	1	2	4	1	4	2	2	3	10	2	2	0	7	4	14	9	2	1	7	7	1
443	Bacteria	NA	Proteobacteria	Gammaproteobacteria	Alteromonadales	Shewanellaceae	Shewanella	Shewanella amazonensis	0	1	0	0	0	0	0	1	0	0	3	2	1	1	0	0	3	1	3	3	3	0	1	0	1	0	2	1	7	1	0	0
444	Bacteria	NA	Proteobacteria	Epsilonproteobacteria	Campylobacterales	Helicobacteraceae	Sulfurimonas	Sulfurimonas denitrificans	0	1	0	0	0	1	0	0	0	0	0	0	0	0	0	0	1	0	0	0	3	0	1	0	0	0	0	0	1	2	1	0
445	Bacteria	NA	Firmicutes	Bacilli	Bacillales	Bacillaceae	Bacillus	Bacillus amyloliquefaciens	0	1	1	0	0	0	3	1	97	33	0	5	0	0	0	0	3	3	6	1	4	2	4	1	0	0	1	0	0	6	2	0
446	Bacteria	NA	Actinobacteria	Actinobacteria	Actinomycetales	Frankiaceae	Frankia	Frankia alni	1	21	2	7	2	5	186	6	6	0	1	8	1	7	0	0	9	73	56	3	25	16	41	0	50	1	12	1	1	7	11	1
447	Bacteria	NA	Chloroflexi	Chloroflexi	Chloroflexales	Chloroflexaceae	Chloroflexus	Chloroflexus aggregans	0	0	0	0	0	0	1	0	0	0	1	0	0	1	0	0	0	1	2	0	0	1	0	0	2	0	3	1	1	1	0	0
448	Viruses	NA	NA	NA	NA	NA	NA	Haloarcula phage SH1	0	0	0	0	0	0	1	0	0	0	0	0	0	0	0	0	0	0	0	0	0	0	0	0	0	0	0	0	0	0	0	0
449	Bacteria	NA	Cyanobacteria	NA	Chroococcales	NA	Acaryochloris	Acaryochloris marina	0	0	0	0	0	1	0	0	0	0	1	1	0	0	0	0	0	0	1	0	0	0	0	0	0	0	0	0	1	1	1	0
450	Eukaryota	Fungi	Ascomycota	Dothideomycetes	Capnodiales	Teratosphaeriaceae	Friedmanniomyces	Friedmanniomyces simplex	0	2	0	1	0	0	0	0	0	0	0	0	0	0	0	0	0	0	0	0	0	0	0	0	0	0	0	0	0	0	0	0
451	Bacteria	NA	Nitrospirae	Nitrospira	Nitrospirales	Nitrospiraceae	Nitrospira	Candidatus Nitrospira defluvii	0	2	0	0	0	1	0	0	0	0	0	0	2	0	146	0	2	0	16	0	2	0	0	0	0	0	1	1	0	3	0	0
452	Archaea	NA	Crenarchaeota	Thermoprotei	Sulfolobales	Sulfolobaceae	Sulfolobus	Sulfolobus acidocaldarius	0	0	0	0	0	0	0	0	0	0	0	0	0	0	0	0	0	0	0	0	0	0	0	0	0	0	1	0	0	0	0	0
453	Eukaryota	Fungi	Ascomycota	Eurotiomycetes	Eurotiales	Aspergillaceae	Aspergillus	Aspergillus fumigatus	12	15	11	8	2	17	20	3	3	3	75	3	4	5	9	1	3	2	2	0	3	1	67	1	4	4	2	0	2	2	2	0
454	Bacteria	NA	Chlorobi	Chlorobia	Chlorobiales	Chlorobiaceae	Chlorobium	Chlorobium phaeobacteroides	0	0	0	0	0	0	1	0	0	0	0	0	0	0	0	0	0	4	4	0	5	1	0	0	0	1	0	0	1	1	2	0
455	Bacteria	NA	Proteobacteria	Alphaproteobacteria	NA	NA	NA	alpha proteobacterium BAL199	0	0	2	3	0	2	2	3	0	0	9	1	0	9	0	1	1	6	6	5	4	1	2	1	3	1	3	2	2	6	0	0
456	Bacteria	NA	Proteobacteria	Alphaproteobacteria	Rickettsiales	Anaplasmataceae	Ehrlichia	Ehrlichia chaffeensis	0	0	0	0	0	1	0	0	0	0	0	0	0	0	0	0	0	0	0	0	0	0	0	0	0	0	1	0	0	0	0	0
457	Eukaryota	NA	Apicomplexa	Aconoidasida	NA	Theileriidae	Theileria	Theileria parva	0	0	1	0	0	0	0	0	0	0	0	0	0	0	0	0	0	0	0	0	0	0	0	0	0	0	0	0	0	1	1	1
458	Viruses	NA	NA	NA	NA	Papillomaviridae	Alphapapillomavirus	Alphapapillomavirus 1	0	0	0	0	0	0	0	0	0	0	0	0	0	0	0	0	0	0	0	0	3	0	0	0	0	0	0	0	0	0	0	0
459	Bacteria	NA	Firmicutes	Bacilli	Lactobacillales	Enterococcaceae	Enterococcus	Enterococcus faecium	0	0	39	0	32	7	24	22	3	2	1	41	30	3	2	3	16	24	8	4	36	13	3	3	7	1	45	0	24	1	12	0
460	Bacteria	NA	Firmicutes	Bacilli	Lactobacillales	Carnobacteriaceae	Carnobacterium	Carnobacterium sp. AT7	0	7	13	43	10	16	576	636	14	12	30	1618	100	8	15	54	429	988	243	36	1535	549	146	20	390	2	1693	11	1050	29	607	2
461	Bacteria	NA	Proteobacteria	Alphaproteobacteria	Rickettsiales	Rickettsiaceae	Orientia	Orientia tsutsugamushi	0	0	0	0	0	0	0	0	0	0	0	0	0	0	0	0	0	0	0	0	0	0	0	0	0	0	0	0	0	0	1	0
462	Bacteria	NA	Firmicutes	Bacilli	Lactobacillales	Lactobacillaceae	Lactobacillus	Lactobacillus fermentum	6207	0	0	0	0	0	0	1	33	4	8	353	2	0	0	0	0	0	130	147	212	37	209	495	0	52	207	0	0	0	0	3
463	Bacteria	NA	Firmicutes	Clostridia	Clostridiales	Clostridiales Family XI. Incertae Sedis	Finegoldia	Finegoldia magna	3	8	0	2	33	8	48	30	13	3	8	17	3	0	5	4	101	223	59	77	219	551	100	30	24	83	84	6	236	138	43	22
464	Bacteria	NA	Proteobacteria	Betaproteobacteria	Nitrosomonadales	Nitrosomonadaceae	Nitrosomonas	Nitrosomonas eutropha	3	11	4	8	1	1	9	16	3	1	5	4	2	15	11	3	3	7	1	4	1	3	4	2	6	0	24	15	1	3	0	4
465	Bacteria	NA	Proteobacteria	Gammaproteobacteria	Pseudomonadales	Moraxellaceae	Psychrobacter	Psychrobacter cryohalolentis	0	0	0	0	1	0	4	2	1	0	1	1	0	0	0	0	3	2	6	1	1	1	0	0	0	0	4	2	8	2	1	0
466	Bacteria	NA	Firmicutes	Clostridia	Clostridiales	Syntrophomonadaceae	Syntrophomonas	Syntrophomonas wolfei	0	0	0	0	2	0	1	0	0	0	0	1	0	0	0	0	2	0	7	0	2	0	1	0	0	0	2	0	7	3	2	0
467	Bacteria	NA	Proteobacteria	Deltaproteobacteria	Syntrophobacterales	Syntrophobacteraceae	Syntrophobacter	Syntrophobacter fumaroxidans	5	0	0	0	0	0	3	1	0	0	0	0	0	0	0	0	0	0	2	1	8	0	1	3	1	0	1	0	0	0	0	1
468	Bacteria	NA	Proteobacteria	Gammaproteobacteria	Vibrionales	Vibrionaceae	Vibrio	Vibrio campbellii	0	0	4	1	4	2	5	0	1	0	0	9	1	0	0	0	23	10	11	0	28	3	1	0	1	0	61	11	67	4	1	4
469	Viruses	NA	NA	NA	Caudovirales	Podoviridae	NA	Actinomyces phage Av-1	0	0	0	0	9	5508	0	0	5	0	0	0	0	0	0	2	0	4	22	1	0	0	0	5	4	0	0	1	29	92	93	0
470	Bacteria	NA	Proteobacteria	Deltaproteobacteria	Desulfuromonadales	Pelobacteraceae	Pelobacter	Pelobacter carbinolicus	0	1	0	0	1	1	0	1	0	0	0	0	0	0	0	1	1	0	3	1	1	1	0	1	0	0	1	0	2	1	0	1
471	Bacteria	NA	Proteobacteria	Deltaproteobacteria	Desulfuromonadales	Pelobacteraceae	Pelobacter	Pelobacter propionicus	0	0	0	0	0	0	5	2	1	0	1	0	1	0	0	0	2	11	6	2	2	5	5	0	2	0	1	0	2	2	1	0
472	Bacteria	NA	Proteobacteria	Betaproteobacteria	Burkholderiales	Comamonadaceae	Rhodoferax	Rhodoferax ferrireducens	0	1	1	0	2	0	4	2	1	0	1	1	0	0	1	1	2	5	4	1	7	2	1	0	5	1	6	0	5	2	0	0
473	Bacteria	NA	Proteobacteria	Gammaproteobacteria	Pasteurellales	Pasteurellaceae	Actinobacillus	Actinobacillus succinogenes	0	1	67	35	36	27	103	2	12	2	0	84	18	8	53	135	575	413	74	13	440	25	39	1	7	1	1498	127	1640	96	102	76
474	Bacteria	NA	Firmicutes	Bacilli	Bacillales	Bacillaceae	Bacillus	Bacillus thuringiensis	0	0	0	0	0	0	0	0	0	0	0	1	0	0	0	0	0	0	0	1	0	0	0	0	0	0	0	0	2	0	1	0
475	Archaea	NA	Euryarchaeota	Methanobacteria	Methanobacteriales	Methanobacteriaceae	Methanosphaera	Methanosphaera stadtmanae	0	0	0	0	0	0	0	0	0	0	0	0	0	0	0	0	0	0	0	0	0	0	0	2	0	0	0	0	0	0	0	0
476	Bacteria	NA	Tenericutes	Mollicutes	Mycoplasmatales	Mycoplasmataceae	Mycoplasma	Mycoplasma capricolum	0	0	0	0	0	0	1	0	1	0	0	0	0	0	0	0	0	0	4	0	1	0	0	1	0	1	1	0	2	1	1	0
477	Bacteria	NA	Firmicutes	Clostridia	Thermoanaerobacterales	Thermoanaerobacteraceae	Thermoanaerobacter	Thermoanaerobacter pseudethanolicus	0	0	0	2	0	0	0	0	0	0	0	0	0	0	0	2	3	4	15	0	6	1	1	0	0	0	5	0	4	2	0	0
478	Bacteria	NA	Proteobacteria	Betaproteobacteria	Burkholderiales	Alcaligenaceae	Bordetella	Bordetella petrii	295	510	479	514	137	99	519	876	125	104	696	384	230	697	326	178	257	603	100	391	124	312	277	149	262	48	1999	904	373	350	155	168
479	Archaea	NA	Crenarchaeota	Thermoprotei	Thermoproteales	Thermoproteaceae	Pyrobaculum	Pyrobaculum arsenaticum	0	0	0	0	0	0	0	0	0	0	0	0	0	0	0	0	0	0	0	0	0	0	0	0	0	0	0	0	0	1	0	0
480	Bacteria	NA	Chlorobi	Chlorobia	Chlorobiales	Chlorobiaceae	Chlorobium	Chlorobium chlorochromatii	0	0	0	0	0	0	1	1	0	0	0	10	0	0	0	1	0	1	0	0	3	0	1	0	2	1	5	1	6	1	0	0
481	Bacteria	NA	Actinobacteria	Actinobacteria	Actinomycetales	Corynebacteriaceae	Corynebacterium	Corynebacterium glutamicum	0	9	0	2	5	6	74	10	29	1	7	0	2	0	2	2	2	12	15	3	9	3	28	0	23	2	14	5	5	7	0	0
482	Eukaryota	Viridiplantae	Chlorophyta	Trebouxiophyceae	Ctenocladales	Ctenocladaceae	Leptosira	Leptosira terrestris	0	0	0	0	0	0	0	0	0	0	0	0	0	0	0	0	0	0	0	1	0	0	0	0	0	0	0	0	0	0	0	0
483	Eukaryota	Fungi	Ascomycota	Eurotiomycetes	Eurotiales	Aspergillaceae	Aspergillus	Aspergillus terreus	0	3	0	1	71	11	4	1	1	0	0	1	0	0	0	1	0	3	2	0	2	2	4	0	2	0	0	1	18	2	1	0
484	Bacteria	NA	Proteobacteria	Alphaproteobacteria	Rhodospirillales	Rhodospirillaceae	Magnetospirillum	Magnetospirillum magneticum	5	3	3	1	0	5	13	3	0	3	19	1	1	4	0	0	9	17	24	11	11	1	9	0	1	1	9	2	6	17	8	0
485	Bacteria	NA	Proteobacteria	Betaproteobacteria	Burkholderiales	Burkholderiaceae	Ralstonia	Ralstonia solanacearum	0	4	0	0	3	0	8	2	4	0	2	1	0	1	0	1	4	1	1	5	1	2	5	1	2	0	1	0	0	5	1	2
486	Bacteria	NA	Firmicutes	Bacilli	Bacillales	Staphylococcaceae	Staphylococcus	Staphylococcus saprophyticus	0	2	2	3	4	2	8	29	5	1	4	35	0	2	0	1	17	57	11	8	35	6	18	5	4	1	45	3	27	7	19	1
487	Viruses	NA	NA	NA	Caudovirales	Myoviridae	Hpunalikevirus	Pasteurella phage F108	0	0	0	0	1	0	0	0	0	0	0	0	0	0	0	0	0	0	0	0	0	0	0	0	0	0	0	0	2	0	0	0
488	Bacteria	NA	Proteobacteria	Gammaproteobacteria	Alteromonadales	Pseudoalteromonadaceae	Pseudoalteromonas	Pseudoalteromonas atlantica	0	0	1	0	0	0	2	1	0	0	0	1	0	0	0	0	4	2	3	1	5	0	1	0	0	0	14	1	21	0	0	0
489	Bacteria	NA	Firmicutes	Bacilli	Lactobacillales	Streptococcaceae	Streptococcus	Streptococcus agalactiae	2	13	11	31	27	451	178	77	6	66	74	2956	37	1	12	5	149	625	124	58	303	339	76	28	236	197	480	7	1319	40	301	10
490	Bacteria	NA	Firmicutes	Bacilli	Lactobacillales	Streptococcaceae	Streptococcus	Streptococcus agalactiae	1	1	0	0	9	2	3	17	1	1	2	12	0	1	1	2	0	3	4	0	7	1	2	0	0	148	2	0	12	2	20	0
491	Bacteria	NA	Firmicutes	Bacilli	Lactobacillales	Streptococcaceae	Streptococcus	Streptococcus agalactiae	1	28	27	24	31	37	455	585	27	53	55	1131	17	4	76	25	351	650	139	125	819	543	157	74	229	7	971	2	717	104	360	12
492	Bacteria	NA	Firmicutes	Bacilli	Lactobacillales	Streptococcaceae	Streptococcus	Streptococcus agalactiae	0	2	8	6	16	4	30	6	13	1	0	39	0	0	5	4	18	125	148	10	43	20	64	0	6	1	276	0	14	54	8	11
493	Bacteria	NA	Firmicutes	Bacilli	Lactobacillales	Streptococcaceae	Streptococcus	Streptococcus agalactiae	0	2	1	1	8	23	964	19	9	1	1	4	0	0	1	5	8	17	38	2	26	59	5	1	6	1	36	0	177	15	31	7
494	Bacteria	NA	Proteobacteria	Gammaproteobacteria	Enterobacteriales	Enterobacteriaceae	Sodalis	Sodalis glossinidius	0	0	0	0	1	0	1	1	0	0	6	2	0	1	0	1	2	0	2	20	2	2	2	0	2	3	1	0	2	1	0	0
495	Bacteria	NA	Proteobacteria	Gammaproteobacteria	Enterobacteriales	Enterobacteriaceae	Shigella	Shigella boydii	0	19	4	26	0	0	0	2	0	5	22	2	2	11	2	6	0	1	1	33	0	6	5	46	2	1	41	0	19	0	0	0
496	Bacteria	NA	Planctomycetes	Planctomycetia	Planctomycetales	Planctomycetaceae	Planctomyces	Planctomyces maris	0	0	0	2	0	0	0	0	0	0	0	0	0	0	0	0	3	0	3	0	5	1	1	0	0	0	6	0	0	1	0	0
497	Bacteria	NA	Proteobacteria	Gammaproteobacteria	Vibrionales	Vibrionaceae	Vibrio	Vibrio cholerae	0	0	0	2	0	2	0	0	0	0	0	0	2	0	0	0	17	1	0	0	1	1	0	0	0	0	43	2	72	0	9	0
498	Bacteria	NA	Proteobacteria	Gammaproteobacteria	Vibrionales	Vibrionaceae	Vibrio	Vibrio cholerae	1	2	3	3	4	1	2	3	0	0	2	2	0	1	2	0	7	2	1	0	2	1	0	0	0	0	11	2	12	3	0	0
499	Bacteria	NA	Tenericutes	Mollicutes	Mycoplasmatales	Mycoplasmataceae	Mycoplasma	Mycoplasma hominis	0	0	0	0	26	1	1	6	0	0	0	2	0	0	0	0	4	1	6	0	18	1	1	3	0	4	4	1	3	0	2	4
500	Bacteria	NA	Tenericutes	Mollicutes	Mycoplasmatales	Mycoplasmataceae	Mycoplasma	Mycoplasma agalactiae	0	0	0	0	0	0	0	0	0	0	0	0	0	0	0	0	0	2	0	0	0	0	0	0	0	0	0	0	0	0	0	0
501	Viruses	NA	NA	NA	Caudovirales	Siphoviridae	Yualikevirus	Pseudomonas phage M6	0	0	0	0	0	0	0	0	1	0	0	0	0	0	0	0	0	0	0	0	0	0	0	0	0	0	0	0	0	0	0	0
502	Eukaryota	NA	Chromerida	NA	NA	NA	NA	Chromerida sp. RM11	0	0	0	0	0	0	0	0	0	0	0	0	0	0	0	0	0	0	0	0	0	0	1	0	0	0	0	0	0	0	0	0
503	Archaea	NA	Euryarchaeota	Halobacteria	Halobacteriales	Halobacteriaceae	Natronomonas	Natronomonas pharaonis	0	0	0	1	0	1	1	0	0	0	1	1	0	0	0	0	0	0	0	1	1	0	0	0	0	0	0	0	1	1	0	0
504	Bacteria	NA	Proteobacteria	Gammaproteobacteria	Pseudomonadales	Moraxellaceae	Psychrobacter	Psychrobacter sp. PRwf-1	0	0	1	0	0	0	2	1	0	0	0	2	0	0	1	1	4	3	3	2	7	1	5	0	0	1	16	0	15	5	0	0
505	Bacteria	NA	Firmicutes	Bacilli	Lactobacillales	Lactobacillaceae	Lactobacillus	Lactobacillus reuteri	83	0	0	0	0	0	5	30	0	0	0	10	0	0	1	0	0	1	4	0	1	168	0	2	0	1	0	0	0	0	3	3
506	Bacteria	NA	Proteobacteria	Gammaproteobacteria	Chromatiales	Ectothiorhodospiraceae	Halorhodospira	Halorhodospira halophila	0	0	0	0	1	0	7	1	0	0	1	0	0	1	0	0	0	5	5	6	6	2	3	1	0	1	2	2	2	1	2	0
507	Bacteria	NA	Firmicutes	Clostridia	Clostridiales	Peptococcaceae	Desulfotomaculum	Desulfotomaculum reducens	0	0	0	0	0	3	1	3	1	0	0	13	0	0	0	1	6	10	24	0	15	7	4	0	0	1	12	0	5	9	11	0
508	Bacteria	NA	Proteobacteria	Alphaproteobacteria	Rhodospirillales	Acetobacteraceae	Acidiphilium	Acidiphilium cryptum	4	12	35	8	0	2	7	3	5	2	62	7	8	29	3	1	10	33	3	46	5	4	11	7	23	10	1	11	8	6	10	2
509	Archaea	NA	Euryarchaeota	Methanomicrobia	Methanosarcinales	Methanosaetaceae	Methanosaeta	Methanosaeta thermophila	0	0	0	0	0	0	0	0	0	0	0	0	0	0	0	0	0	0	0	0	1	0	0	0	0	0	0	0	0	0	0	0
510	Bacteria	NA	Firmicutes	Bacilli	Lactobacillales	Leuconostocaceae	Leuconostoc	Leuconostoc citreum	46	2	1	2	0	0	20	3	5	0	396	8	3	7	0	2	11	37	8	556	9	27	0	5	16	33	5	5	6	1	12	5
511	Bacteria	NA	Proteobacteria	Gammaproteobacteria	Oceanospirillales	Hahellaceae	Hahella	Hahella chejuensis	0	1	1	0	0	0	0	0	0	0	2	1	1	0	0	1	0	2	0	2	1	1	1	0	1	1	1	0	1	0	0	0
512	Bacteria	NA	Verrucomicrobia	Verrucomicrobiae	Verrucomicrobiales	Verrucomicrobiaceae	Akkermansia	Akkermansia muciniphila	0	0	0	0	0	0	13	0	0	2	1	0	0	0	0	1	3	7	3	0	17	3	4	0	1	1	22	0	0	5	0	0
513	Bacteria	NA	Proteobacteria	Gammaproteobacteria	Enterobacteriales	Enterobacteriaceae	Yersinia	Yersinia intermedia	0	0	0	0	0	0	1	2	0	0	2	0	1	0	1	0	7	3	2	8	4	0	1	0	0	0	20	4	15	1	1	0
514	Bacteria	NA	Proteobacteria	Gammaproteobacteria	Enterobacteriales	Enterobacteriaceae	Yersinia	Yersinia frederiksenii	0	0	2	1	4	0	2	1	1	0	1	6	0	0	0	1	23	22	1	6	21	0	6	1	0	0	32	0	42	3	12	4
515	Bacteria	NA	Proteobacteria	Gammaproteobacteria	Enterobacteriales	Enterobacteriaceae	Yersinia	Yersinia mollaretii	0	0	3	0	0	0	0	0	0	0	4	3	1	0	0	0	19	4	4	9	7	1	1	1	0	1	12	1	9	1	2	1
516	Bacteria	NA	Proteobacteria	Gammaproteobacteria	Enterobacteriales	Enterobacteriaceae	Yersinia	Yersinia bercovieri	0	0	0	0	0	0	0	1	0	0	2	1	1	1	0	0	4	2	0	13	1	0	2	1	1	1	8	0	3	1	2	1
517	Bacteria	NA	Actinobacteria	Actinobacteria	Actinomycetales	Mycobacteriaceae	Mycobacterium	Mycobacterium gilvum	1	16	3	21	1	37	261	12	11	0	4	3	1	3	1	1	7	40	14	6	19	102	8	2	13	0	6	1	7	5	6	1
518	Bacteria	NA	Actinobacteria	Actinobacteria	Actinomycetales	Mycobacteriaceae	Mycobacterium	Mycobacterium vanbaalenii	1	5	1	2	2	0	49	10	10	1	8	30	6	3	4	0	17	77	28	4	13	42	50	3	20	3	8	1	1	13	38	0
519	Bacteria	NA	Firmicutes	Clostridia	Clostridiales	Clostridiaceae	Alkaliphilus	Alkaliphilus oremlandii	0	4	0	0	1	4	6	0	0	0	0	9	1	0	0	4	21	22	29	2	57	32	25	9	5	9	13	0	20	32	9	15
520	Bacteria	NA	Proteobacteria	Betaproteobacteria	Burkholderiales	Burkholderiaceae	Burkholderia	Burkholderia dolosa	0	0	0	0	0	0	2	2	1	0	3	0	0	0	0	0	2	1	2	9	5	2	0	1	1	1	0	0	1	7	0	0
74	Bacteria	NA	Proteobacteria	Gammaproteobacteria	Pseudomonadales	Pseudomonadaceae	Pseudomonas	Pseudomonas putida	6	2	2	44	1	1	42	2	1	2	144	22	1	1	22	6	1	0	14	20	1	0	1	6	9	14	37	14	5	0	3	3
522	Bacteria	NA	Proteobacteria	Alphaproteobacteria	Rhodobacterales	Rhodobacteraceae	Roseobacter	Roseobacter sp. AzwK-3b	3	8	3	4	1	1	1	1	1	1	3	0	0	0	1	1	1	2	2	15	2	1	1	0	2	0	1	1	0	2	1	2
523	Archaea	NA	Euryarchaeota	Methanomicrobia	Methanocellales	Methanocellaceae	Methanocella	Methanocella arvoryzae	0	0	0	0	0	0	2	0	0	0	0	0	0	0	0	0	0	1	0	0	0	0	1	0	0	0	0	0	0	0	0	0
524	Bacteria	NA	Proteobacteria	Gammaproteobacteria	Alteromonadales	Alteromonadaceae	Marinobacter	Marinobacter hydrocarbonoclasticus	1	8	15	33	2	10	4	5	9	1	9	1	6	4	4	2	2	7	0	1	1	1	3	1	5	0	11	9	14	19	0	2
525	Bacteria	NA	Proteobacteria	Deltaproteobacteria	Desulfuromonadales	Geobacteraceae	Geobacter	Geobacter uraniireducens	1	1	0	0	0	1	3	1	1	1	1	2	1	0	0	0	1	3	7	3	14	0	5	1	2	0	2	0	1	3	6	0
526	Bacteria	NA	Actinobacteria	Actinobacteria	Actinomycetales	Acidothermaceae	Acidothermus	Acidothermus cellulolyticus	0	2	0	0	0	0	14	1	2	0	1	2	0	1	0	0	2	14	9	0	5	4	5	0	6	0	5	0	0	3	5	0
527	Bacteria	NA	Firmicutes	Clostridia	Thermoanaerobacterales	Thermoanaerobacterales Family III. Incertae Sedis	Caldicellulosiruptor	Caldicellulosiruptor saccharolyticus	0	0	1	0	0	0	1	0	0	0	0	0	1	0	0	0	1	0	2	0	2	4	0	0	2	0	2	1	2	1	0	0
528	Bacteria	NA	Proteobacteria	Gammaproteobacteria	Alteromonadales	Shewanellaceae	Shewanella	Shewanella sp. W3-18-1	0	1	1	0	1	3	0	2	8	0	3	5	2	1	2	4	28	17	5	7	28	4	2	1	21	0	22	2	56	7	12	9
529	Bacteria	NA	Proteobacteria	Gammaproteobacteria	Pseudomonadales	Pseudomonadaceae	Pseudomonas	Pseudomonas putida	0	26	0	1	4	12	2	35	1	0	12	0	0	16	1	1	2	23	3	83	15	3	15	1	0	4	0	0	1	24	7	16
530	Bacteria	NA	Synergistetes	Synergistia	Synergistales	Synergistaceae	Pyramidobacter	Pyramidobacter piscolens	1	4	1	2	12	10	7	7	5	1	0	4	1	2	3	12	91	40	25	2	51	11	18	6	4	18	92	1	94	47	27	12
531	Viruses	NA	NA	NA	Caudovirales	Siphoviridae	NA	Lactococcus phage Tuc2009	0	0	0	0	0	0	0	0	0	0	0	0	0	0	0	0	0	0	1	0	0	0	0	0	0	0	0	0	0	0	0	0
532	Eukaryota	NA	NA	NA	Dictyosteliida	NA	Dictyostelium	Dictyostelium discoideum	1	2	0	4	2	2	4	3	1	0	0	5	3	2	1	1	0	1	6	0	6	0	2	3	1	2	0	2	10	4	1	3
533	Viruses	NA	NA	NA	Herpesvirales	Herpesviridae	Mardivirus	Gallid herpesvirus 3	21	3	6	4	6	13	3	5	2	0	1	2	0	0	0	4	1	0	0	3	0	2	0	2	8	5	0	3	0	1	2	0
534	Eukaryota	NA	Apicomplexa	Coccidia	Eucoccidiorida	Cryptosporidiidae	Cryptosporidium	Cryptosporidium parvum	68	299	61	62	295	190	94	57	149	132	19	23	175	42	143	189	13	11	16	59	35	20	24	32	28	18	25	57	23	40	27	24
535	Eukaryota	NA	Apicomplexa	Aconoidasida	NA	Theileriidae	Theileria	Theileria annulata	0	0	0	0	0	1	0	1	0	0	0	0	1	2	0	0	0	0	1	0	0	0	0	0	0	0	1	0	0	1	0	0
536	Viruses	NA	NA	NA	Caudovirales	Myoviridae	P2likevirus	Pseudomonas phage phiCTX	0	0	0	0	0	0	0	0	0	0	0	0	0	0	0	0	0	0	0	1	0	0	0	0	0	0	0	0	0	0	0	0
537	Viruses	NA	NA	NA	Caudovirales	Siphoviridae	NA	Lactococcus phage TP901-1	0	0	0	1	0	0	0	0	0	0	0	0	0	0	0	0	0	0	2	0	0	0	0	1	0	0	0	1	0	0	0	0
538	Viruses	NA	NA	NA	Caudovirales	Siphoviridae	NA	Lactococcus phage P335 sensu lato	0	0	0	0	0	0	0	0	0	0	0	0	0	0	0	0	0	0	3	0	0	0	0	0	0	0	0	0	0	0	0	0
539	Viruses	NA	NA	NA	Caudovirales	Siphoviridae	Tunalikevirus	Enterobacteria phage RTP	0	0	0	0	0	0	0	0	0	0	0	0	0	0	0	0	1	0	0	0	0	0	0	0	0	0	0	0	0	0	0	0
540	Bacteria	NA	Spirochaetes	Spirochaetia	Spirochaetales	Leptospiraceae	Leptospira	Leptospira borgpetersenii	0	0	0	0	0	0	0	1	0	0	0	0	0	0	0	0	1	0	1	1	2	1	0	0	0	0	0	0	1	1	1	0
541	Bacteria	NA	Spirochaetes	Spirochaetia	Spirochaetales	Leptospiraceae	Leptospira	Leptospira biflexa	0	0	0	0	0	0	2	1	0	0	0	0	0	0	0	0	0	0	0	0	0	0	0	0	0	0	0	0	0	0	0	0
542	Bacteria	NA	Proteobacteria	Gammaproteobacteria	Alteromonadales	Psychromonadaceae	Psychromonas	Psychromonas ingrahamii	0	0	1	0	3	0	2	0	1	0	0	1	0	0	1	0	3	3	2	0	3	0	1	0	1	0	18	0	2	3	3	0
543	Bacteria	NA	Chloroflexi	Chloroflexi	Chloroflexales	Chloroflexaceae	Roseiflexus	Roseiflexus sp. RS-1	0	0	1	0	0	0	2	0	0	0	1	0	0	0	0	2	2	0	3	0	1	0	0	0	1	0	0	0	0	1	1	0
544	Bacteria	NA	Firmicutes	Clostridia	Clostridiales	Clostridiaceae	Clostridium	Clostridium phytofermentans	0	1	5	5	2	16	4	4	0	2	0	81	1	2	1	19	39	29	90	7	65	121	78	2	15	1	258	2	71	48	12	33
545	Bacteria	NA	Firmicutes	Bacilli	Bacillales	Paenibacillaceae	Brevibacillus	Brevibacillus brevis	0	0	0	1	2	0	0	2	1	0	0	4	0	0	0	0	2	18	8	1	6	7	4	2	1	0	7	0	2	5	2	0
546	Bacteria	NA	Proteobacteria	Gammaproteobacteria	Xanthomonadales	Xanthomonadaceae	Xanthomonas	Xanthomonas oryzae	4	0	0	0	0	1	1	3	0	0	1	0	0	1	0	0	2	4	5	2	3	2	2	1	1	0	1	0	3	2	0	0
547	Bacteria	NA	Proteobacteria	Alphaproteobacteria	Rhizobiales	Bartonellaceae	Bartonella	Bartonella bacilliformis	1	0	0	0	0	0	0	0	0	0	0	0	0	0	0	0	0	1	1	0	1	0	0	0	0	0	0	0	0	1	0	0
548	Bacteria	NA	Proteobacteria	Epsilonproteobacteria	Campylobacterales	Campylobacteraceae	Campylobacter	Campylobacter concisus	8	1246	380	6938	486	877	1744	15216	2239	306	2730	239483	664	1741	1636	227	131495	99124	59083	23301	359408	244100	53990	3376	50658	15	115421	907	94781	291265	27307	7083
549	Bacteria	NA	Proteobacteria	Epsilonproteobacteria	Campylobacterales	Campylobacteraceae	Campylobacter	Campylobacter curvus	156	6	0	2	14	16	556	10	119	0	10	102	1	2	2	4	121	399	134	51	175	123	96	15	129	3	71	6	59	516	14	47
550	Bacteria	NA	Proteobacteria	Epsilonproteobacteria	Campylobacterales	Campylobacteraceae	Campylobacter	Campylobacter hominis	0	2	0	7	56	1	20	2	2	4	2	1225	0	0	0	7	41	24	31	4	185	8	6	21	7	1	94	22	229	34	35	45
551	Bacteria	NA	Proteobacteria	Epsilonproteobacteria	Campylobacterales	Campylobacteraceae	Campylobacter	Campylobacter jejuni	0	0	0	0	4	0	1	0	0	0	0	0	0	0	0	0	12	3	1	11	1	0	2	0	0	0	14	0	6	109	3	1
552	Bacteria	NA	Proteobacteria	Epsilonproteobacteria	Campylobacterales	Campylobacteraceae	Campylobacter	Campylobacter jejuni	0	0	0	1	0	0	0	0	0	0	0	0	0	0	0	0	0	0	0	0	0	0	0	0	0	0	0	0	0	0	0	0
553	Bacteria	NA	Proteobacteria	Betaproteobacteria	Burkholderiales	Alcaligenaceae	Bordetella	Bordetella avium	2	1	0	0	0	1	5	1	1	0	3	4	3	1	0	0	0	2	7	3	3	3	2	1	1	0	4	1	0	1	2	0
554	Bacteria	NA	Firmicutes	Bacilli	Bacillales	NA	Exiguobacterium	Exiguobacterium sp. AT1b	0	0	0	4	0	0	3	15	1	0	0	31	0	1	4	0	1	6	28	2	17	5	6	0	6	1	4	0	9	1	4	1
555	Bacteria	NA	Firmicutes	Bacilli	Bacillales	Bacillaceae	Bacillus	Bacillus cereus	0	0	0	0	0	0	2	0	0	0	3	0	0	0	0	0	3	1	0	0	5	9	0	1	0	0	0	0	2	0	0	0
556	Bacteria	NA	Actinobacteria	Actinobacteria	Actinomycetales	Mycobacteriaceae	Mycobacterium	Mycobacterium ulcerans	0	2	0	0	0	0	2	6	4	1	1	0	0	0	0	3	0	11	2	3	0	9	3	0	12	1	0	0	4	2	0	0
557	Bacteria	NA	Proteobacteria	Deltaproteobacteria	Desulfovibrionales	Desulfovibrionaceae	Lawsonia	Lawsonia intracellularis	0	0	0	0	0	0	0	0	0	0	0	0	0	0	0	0	1	1	0	0	0	0	1	0	0	0	1	0	5	0	0	0
558	Eukaryota	NA	Apicomplexa	Aconoidasida	Haemosporida	NA	Plasmodium	Plasmodium falciparum	1	3	4	1	0	1	3	5	0	0	0	1	0	1	0	1	1	0	2	0	0	1	0	0	0	2	4	0	0	4	1	1
559	Viruses	NA	NA	NA	Caudovirales	Siphoviridae	C2likevirus	Lactococcus phage bIL67	0	0	0	0	0	0	0	0	0	0	0	0	0	0	0	0	0	0	1	1	0	0	0	0	0	0	0	0	0	0	0	0
560	Viruses	NA	NA	NA	Caudovirales	Myoviridae	NA	Lactobacillus phage KC5a	76	0	0	0	0	0	0	0	0	0	0	1	0	0	0	0	0	0	0	0	0	0	0	1	0	11	0	0	0	0	0	0
561	Viruses	NA	NA	NA	NA	Iridoviridae	Lymphocystivirus	Lymphocystis disease virus 1	0	0	0	0	0	0	0	0	0	0	0	0	0	0	0	0	0	0	0	0	1	0	0	0	0	0	0	0	0	0	0	0
562	Bacteria	NA	Proteobacteria	Betaproteobacteria	Burkholderiales	Comamonadaceae	Polaromonas	Polaromonas naphthalenivorans	7	22	10	7	5	3	18	22	3	3	22	10	4	23	4	2	8	13	12	11	15	23	14	4	5	4	59	17	13	14	8	10
563	Bacteria	NA	Firmicutes	Bacilli	Lactobacillales	Streptococcaceae	Streptococcus	Streptococcus mitis	107	18560	175937	243072	385713	450675	1891337	77494	197511	840731	24873	63951	23921	8580	113180	68012	72664	196932	211567	15540	587459	40139	306508	10305	20259	11045	329087	9810	319130	97037	158628	23196
564	Bacteria	NA	Proteobacteria	Alphaproteobacteria	Rhizobiales	Rhizobiaceae	Sinorhizobium	Sinorhizobium medicae	0	0	3	0	1	1	3	1	1	0	0	0	0	0	0	0	0	2	9	4	3	1	0	0	2	0	0	5	3	1	1	1
565	Bacteria	NA	Proteobacteria	Alphaproteobacteria	Caulobacterales	Caulobacteraceae	Caulobacter	Caulobacter sp. K31	4	4	7	6	1	6	13	7	3	0	18	0	1	6	6	4	1	9	2	14	5	4	1	3	12	0	10	6	6	3	1	5
566	Bacteria	NA	Proteobacteria	Epsilonproteobacteria	Campylobacterales	Campylobacteraceae	Arcobacter	Arcobacter butzleri	0	0	0	0	0	0	0	1	0	0	0	6	0	0	0	2	5	0	4	0	17	4	1	0	3	0	0	0	4	2	2	0
567	Eukaryota	Metazoa	Cnidaria	Anthozoa	Scleractinia	Agariciidae	Agaricia	Agaricia humilis	0	0	0	0	0	0	0	0	0	0	0	0	0	1	0	0	0	0	0	0	0	0	0	0	0	0	0	0	0	0	0	0
568	Bacteria	NA	Actinobacteria	Actinobacteria	Actinomycetales	Mycobacteriaceae	Mycobacterium	Mycobacterium abscessus	1	6	1	2	2	7	25	10	6	2	2	10	0	1	1	0	16	11	22	5	15	6	35	0	26	0	4	0	5	3	1	0
569	Archaea	NA	Euryarchaeota	Methanomicrobia	Methanomicrobiales	Methanomicrobiaceae	Methanoculleus	Methanoculleus marisnigri	0	2	0	0	0	1	1	1	0	0	0	0	0	0	0	0	0	1	0	0	1	0	3	1	1	1	0	1	0	1	0	0
570	Bacteria	NA	Proteobacteria	Gammaproteobacteria	Enterobacteriales	Enterobacteriaceae	Wigglesworthia	Wigglesworthia glossinidia	0	0	0	0	0	0	1	0	0	0	0	0	0	0	0	0	0	0	1	0	0	0	0	0	0	0	2	1	1	0	0	0
571	Eukaryota	Viridiplantae	Chlorophyta	Prasinophyceae	Pyramimonadales	NA	Pyramimonas	Pyramimonas parkeae	0	0	0	0	0	0	4	0	0	0	0	0	0	0	0	0	0	0	0	7	0	45	0	0	5	0	3	0	0	5	0	2
572	Bacteria	NA	Actinobacteria	Actinobacteria	Actinomycetales	Micromonosporaceae	Salinispora	Salinispora tropica	1	1	0	0	1	8	28	6	3	0	1	6	0	1	0	0	3	13	5	4	1	10	11	1	23	2	2	0	1	1	5	0
573	Bacteria	NA	Firmicutes	Clostridia	Clostridiales	Peptococcaceae	Pelotomaculum	Pelotomaculum thermopropionicum	0	1	0	0	1	1	4	0	1	0	0	1	0	0	0	0	0	3	10	0	2	1	3	0	2	0	1	0	0	3	0	0
574	Bacteria	NA	Firmicutes	Bacilli	Lactobacillales	Streptococcaceae	Streptococcus	Streptococcus pyogenes	1	8	18	12	0	6	23	45	8	6	4	552	9	3	21	30	29	287	16	89	77	231	156	529	296	84	92	1	247	26	22	3
575	Viruses	NA	NA	NA	Caudovirales	Siphoviridae	NA	Streptomyces phage mu1/6	0	0	0	0	0	0	0	0	0	0	0	0	0	0	0	0	0	1	0	0	0	0	0	0	0	0	0	0	0	0	0	0
576	Viruses	NA	NA	NA	Herpesvirales	Herpesviridae	Mardivirus	Meleagrid herpesvirus 1	0	0	0	0	1	0	1	0	0	0	0	0	0	0	0	0	0	0	0	1	0	0	0	0	0	0	0	1	0	0	0	0
577	Viruses	NA	NA	NA	NA	Virgaviridae	Pomovirus	Potato mop-top virus	0	0	0	0	0	0	0	0	0	0	0	0	0	0	0	0	0	0	0	0	0	0	1	0	0	0	0	0	0	0	0	0
578	Bacteria	NA	Proteobacteria	Alphaproteobacteria	Rhodobacterales	Rhodobacteraceae	Rhodobacter	Rhodobacter sp. SW2	2	11	3	35	2	1	3	4	2	5	25	3	1	3	1	0	0	4	1	28	2	2	1	2	1	0	1	1	0	0	0	0
579	Viruses	NA	NA	NA	Caudovirales	Siphoviridae	NA	Streptococcus phage M102	0	0	0	0	0	0	19	0	0	0	0	0	0	0	0	0	0	0	0	0	0	0	0	0	0	0	0	0	0	0	0	0
580	Bacteria	NA	Proteobacteria	Gammaproteobacteria	Enterobacteriales	Enterobacteriaceae	Buchnera	Buchnera aphidicola	0	0	0	0	0	0	0	0	0	0	0	0	0	0	0	0	0	0	4	0	3	0	0	0	0	0	1	0	0	5	0	0
581	Viruses	NA	NA	NA	Caudovirales	Siphoviridae	NA	Mycobacterium phage Qyrzula	1	0	0	1	0	0	0	1	0	0	0	0	0	0	0	0	0	0	0	0	0	0	0	0	0	0	0	0	0	0	0	0
582	Bacteria	NA	Proteobacteria	Gammaproteobacteria	Enterobacteriales	Enterobacteriaceae	Yersinia	Yersinia pestis	23	8	416	9	16	2	156	3	3	7	13	21	4	20	4	6	9	15	18	32	2	8	34	33	12	3	386	11	7	15	1	1
583	Bacteria	NA	Firmicutes	Clostridia	Halanaerobiales	Halanaerobiaceae	Halothermothrix	Halothermothrix orenii	0	0	0	1	0	1	0	0	0	0	0	1	0	0	0	1	2	3	1	1	6	2	0	1	0	0	1	0	1	5	0	0
584	Bacteria	NA	Proteobacteria	Gammaproteobacteria	NA	NA	NA	Candidatus Baumannia cicadellinicola	0	0	0	0	0	0	2	0	0	0	0	0	0	0	1	2	0	0	0	0	1	0	0	0	0	0	2	0	1	0	1	0
585	Viruses	NA	NA	NA	NA	Microviridae	Microvirus	Enterobacteria phage phiX174 sensu lato	18	23	0	0	0	0	0	0	0	0	11	22	5	0	0	0	0	0	0	12	0	0	0	0	0	0	4	5	0	0	0	0
586	Viruses	NA	NA	NA	NA	Microviridae	Microvirus	Enterobacteria phage G4 sensu lato	0	0	0	0	0	0	0	0	0	0	1	0	0	0	0	0	0	0	0	0	0	0	0	0	0	0	0	0	0	0	0	0
587	Bacteria	NA	Proteobacteria	Gammaproteobacteria	Pasteurellales	Pasteurellaceae	Haemophilus	Haemophilus influenzae	0	129	1681	1325	3605	2644	4905	48	806	1804	27	3890	1014	327	2025	5951	21966	10495	17011	872	20685	1107	3543	278	380	200	48563	4540	68453	4791	6858	4773
588	Bacteria	NA	Proteobacteria	Betaproteobacteria	Burkholderiales	Oxalobacteraceae	Janthinobacterium	Janthinobacterium sp. Marseille	0	0	0	0	0	0	3	0	1	1	2	3	3	0	0	0	2	2	3	0	6	1	3	0	0	0	4	3	1	2	0	2
589	Bacteria	NA	Proteobacteria	Alphaproteobacteria	Rhodobacterales	Rhodobacteraceae	Roseobacter	Roseobacter denitrificans	0	0	0	1	0	0	1	1	0	0	5	0	0	0	0	0	0	0	5	2	2	2	1	0	1	0	0	0	3	1	1	0
590	Bacteria	NA	Bacteroidetes	Flavobacteriia	Flavobacteriales	Flavobacteriaceae	Flavobacterium	Flavobacterium johnsoniae	0	1	1	1	3	2	1	2	0	0	5	2	0	0	0	3	24	28	151	18	52	12	16	0	0	0	36	6	9	16	10	13
591	Viruses	NA	NA	NA	Caudovirales	Siphoviridae	NA	Propionibacterium phage PA6	0	0	2	5	0	3	0	9	2	0	1	0	0	2	1	1	0	4	2	9	0	2	1	1	0	0	3	4	1	1	5	1
592	Bacteria	NA	Tenericutes	Mollicutes	Acholeplasmatales	Acholeplasmataceae	Candidatus Phytoplasma	Candidatus Phytoplasma mali	0	0	0	0	0	0	1	0	0	0	0	1	0	0	0	0	0	0	0	0	0	1	0	0	0	0	0	0	0	0	0	0
593	Eukaryota	Fungi	Ascomycota	Eurotiomycetes	Eurotiales	Trichocomaceae	Talaromyces	Talaromyces marneffei	0	0	0	0	0	0	0	0	0	0	0	0	0	0	0	0	0	0	0	0	0	0	0	0	0	0	0	0	0	0	1	0
594	Bacteria	NA	Chlorobi	Chlorobia	Chlorobiales	Chlorobiaceae	Chlorobium	Chlorobium ferrooxidans	0	0	0	0	0	1	0	0	1	0	0	0	0	1	0	0	0	0	3	0	1	0	0	1	0	0	2	0	0	1	0	1
595	Bacteria	NA	Proteobacteria	Gammaproteobacteria	Alteromonadales	NA	Teredinibacter	Teredinibacter turnerae	0	1	0	0	0	0	3	1	0	0	0	0	0	0	0	2	1	4	1	1	6	1	1	0	0	0	1	0	1	0	0	0
596	Bacteria	NA	Actinobacteria	Actinobacteria	Actinomycetales	Micrococcaceae	Kocuria	Kocuria rhizophila	9	97	15	48	11	193	1109	242	55	10	25	716	10	58	2	3	92	129	96	114	58	299	195	18	705	66	73	13	31	138	41	9
597	Bacteria	NA	Proteobacteria	Deltaproteobacteria	Myxococcales	Cystobacteraceae	Stigmatella	Stigmatella aurantiaca	0	3	0	0	1	1	10	2	2	0	0	7	0	1	0	0	0	7	10	2	1	5	0	1	4	2	4	0	3	3	5	0
598	Bacteria	NA	Gemmatimonadetes	Gemmatimonadetes	Gemmatimonadales	Gemmatimonadaceae	Gemmatimonas	Gemmatimonas aurantiaca	0	1	0	0	0	1	3	0	0	0	0	0	0	0	0	0	1	6	5	0	6	6	4	1	3	0	2	0	2	2	0	0
629	Bacteria	NA	Proteobacteria	Gammaproteobacteria	Pseudomonadales	Pseudomonadaceae	Pseudomonas	Pseudomonas putida	1	7	18	20	1	15	8	20	7	0	214	23	139	8	2	100	16	38	3	243	63	3	4	14	3	43	27	23	206	8	11	3
600	Viruses	NA	NA	NA	NA	Baculoviridae	Alphabaculovirus	Plutella xylostella multiple nucleopolyhedrovirus	1	0	0	0	0	0	0	0	0	0	0	0	0	1	0	0	0	0	0	0	0	0	0	0	0	0	0	0	1	0	0	0
601	Bacteria	NA	Proteobacteria	Gammaproteobacteria	Xanthomonadales	Xanthomonadaceae	Xanthomonas	Xanthomonas albilineans	0	2	0	0	0	1	4	4	0	1	3	2	2	0	2	1	1	1	5	2	5	0	4	6	4	1	2	2	0	3	3	0
602	Viruses	NA	NA	NA	NA	Phycodnaviridae	Chlorovirus	Paramecium bursaria Chlorella virus AR158	0	0	1	0	0	0	0	1	0	0	0	0	0	3	0	0	0	0	0	1	1	0	0	1	0	0	0	0	0	0	0	0
603	Bacteria	NA	Proteobacteria	Gammaproteobacteria	Aeromonadales	Aeromonadaceae	Aeromonas	Aeromonas hydrophila	9	15	10	20	3	15	36	6	5	2	6117	1	2	13	6	0	52	25	10	8420	4	6	7	801	14	995	30	23	65	11	14	4
604	Bacteria	NA	Aquificae	Aquificae	Aquificales	Aquificaceae	Hydrogenobaculum	Hydrogenobaculum sp. Y04AAS1	0	0	0	0	0	1	0	0	0	0	0	0	0	0	0	0	0	0	1	0	0	0	0	0	0	0	0	0	0	0	0	0
605	Bacteria	NA	Proteobacteria	Betaproteobacteria	Burkholderiales	Burkholderiaceae	Cupriavidus	Cupriavidus necator	1	2	2	1	1	4	55	10	0	1	11	4	8	9	1	6	20	15	20	18	27	20	5	3	3	1	15	3	11	2	4	2
606	Bacteria	NA	Thermotogae	Thermotogae	Thermotogales	Thermotogaceae	Fervidobacterium	Fervidobacterium nodosum	0	0	0	0	0	0	0	0	0	0	0	0	0	1	0	0	0	1	0	0	0	1	0	0	0	0	2	0	0	0	0	0
607	Bacteria	NA	Proteobacteria	Gammaproteobacteria	Aeromonadales	Aeromonadaceae	Aeromonas	Aeromonas salmonicida	14	9	61	4	3	4	8	1	1	1	1445	4	2	53	1	0	3	27	1	1323	8	3	0	89	19	134	6	37	2	5	0	0
608	Bacteria	NA	Verrucomicrobia	Verrucomicrobiae	Verrucomicrobiales	NA	NA	Verrucomicrobiae bacterium DG1235	0	1	1	0	1	2	7	0	0	0	0	0	0	1	0	0	1	6	8	0	8	1	1	0	0	0	10	0	9	1	3	0
609	Bacteria	NA	Proteobacteria	Epsilonproteobacteria	Campylobacterales	Helicobacteraceae	Helicobacter	Helicobacter acinonychis	0	0	0	0	0	0	0	0	0	1	0	0	0	0	0	0	0	0	2	0	3	0	0	0	0	0	0	0	0	3	0	0
610	Bacteria	NA	Proteobacteria	Alphaproteobacteria	Rhizobiales	Bartonellaceae	Bartonella	Bartonella tribocorum	0	0	0	1	0	0	1	0	0	0	0	0	0	0	0	0	0	0	2	0	1	0	0	0	0	0	3	0	0	0	0	0
611	Bacteria	NA	Chloroflexi	Chloroflexi	Chloroflexales	Chloroflexaceae	Roseiflexus	Roseiflexus castenholzii	0	1	0	1	1	0	0	1	2	0	0	1	0	0	0	0	0	0	3	1	3	0	0	0	1	0	2	0	1	0	0	0
612	Bacteria	NA	Proteobacteria	Betaproteobacteria	Methylophilales	NA	NA	Methylophilales bacterium HTCC2181	0	0	0	0	0	0	0	0	0	0	0	0	0	0	0	0	0	0	0	0	0	0	0	0	0	0	1	0	0	0	0	0
613	Archaea	NA	Crenarchaeota	Thermoprotei	Thermoproteales	Thermoproteaceae	Pyrobaculum	Pyrobaculum islandicum	0	0	0	0	0	0	0	1	0	0	0	0	0	0	0	0	0	0	0	0	0	0	0	0	0	0	0	0	0	0	0	0
1539	Bacteria	NA	Proteobacteria	Gammaproteobacteria	Pseudomonadales	Pseudomonadaceae	Pseudomonas	Pseudomonas putida	16	10	12	15	8	8	8	10	11	13	107	4	6	15	4	3	22	86	2	61	1	11	1	7	31	3	11	3	2	6	28	0
615	Bacteria	NA	Proteobacteria	Alphaproteobacteria	Rhodobacterales	Rhodobacteraceae	Labrenzia	Labrenzia aggregata	0	0	1	1	0	1	2	11	2	0	6	0	0	0	0	1	1	3	5	5	3	5	0	0	1	0	0	1	1	3	3	0
616	Bacteria	NA	Firmicutes	Bacilli	Bacillales	Listeriaceae	Listeria	Listeria welshimeri	0	0	1	4	0	2	5	6	0	0	0	15	0	0	1	0	34	9	8	23	118	17	6	1	5	1	19	1	96	4	16	0
617	Bacteria	NA	Firmicutes	Clostridia	Clostridiales	Clostridiaceae	Clostridium	Clostridium novyi	0	1	0	2	5	0	0	0	1	0	0	3	0	1	1	1	12	9	18	4	11	18	6	0	1	0	25	0	5	5	3	3
618	Viruses	NA	NA	NA	Caudovirales	Podoviridae	Phikmvlikevirus	Pseudomonas phage LKA1	0	0	0	0	0	0	0	0	0	0	0	0	0	0	0	0	0	1	0	0	0	0	0	0	0	0	0	1	0	0	0	0
619	Bacteria	NA	Proteobacteria	Epsilonproteobacteria	NA	NA	Nitratiruptor	Nitratiruptor sp. SB155-2	0	0	0	0	1	0	0	0	0	1	0	1	0	0	0	0	1	4	3	0	0	0	0	0	0	0	5	0	1	5	0	0
620	Bacteria	NA	Proteobacteria	Epsilonproteobacteria	NA	NA	Sulfurovum	Sulfurovum sp. NBC37-1	0	0	0	0	0	0	0	0	0	0	0	2	0	0	0	0	0	0	0	0	1	1	0	0	0	0	1	0	0	0	1	0
621	Viruses	NA	NA	NA	NA	Poxviridae	Yatapoxvirus	Yaba monkey tumor virus	0	0	0	0	0	0	0	0	0	0	0	0	0	0	0	0	0	0	0	0	0	0	0	0	0	0	0	0	1	0	0	0
622	Bacteria	NA	Proteobacteria	Gammaproteobacteria	Vibrionales	Vibrionaceae	Aliivibrio	Aliivibrio fischeri	0	0	5	2	3	3	12	0	0	0	0	15	3	0	1	15	75	50	12	1	61	1	6	0	2	1	159	6	172	7	21	14
623	Bacteria	NA	Proteobacteria	Alphaproteobacteria	Rhodobacterales	Rhodobacteraceae	Sagittula	Sagittula stellata	3	9	1	13	0	2	8	1	1	2	11	0	0	1	1	2	4	2	2	7	3	5	2	2	0	0	4	3	1	3	1	0
624	Bacteria	NA	Firmicutes	Bacilli	Bacillales	Bacillaceae	Bacillus	Bacillus sp. B14905	0	0	1	0	0	1	7	3	1	0	0	9	0	0	2	2	2	11	8	1	19	1	13	1	2	0	12	0	10	2	4	0
625	Bacteria	NA	Proteobacteria	Alphaproteobacteria	Rhodobacterales	Rhodobacteraceae	NA	Rhodobacteraceae bacterium HTCC2150	0	1	0	0	0	0	1	0	0	0	0	1	0	0	0	0	1	2	8	1	2	1	0	0	1	0	3	0	5	1	1	0
626	Bacteria	NA	Proteobacteria	Alphaproteobacteria	Rhodobacterales	Rhodobacteraceae	Roseobacter	Roseobacter sp. SK209-2-6	0	0	0	2	0	0	2	2	2	0	2	1	0	0	1	0	0	3	0	0	2	2	1	1	1	0	3	0	0	1	0	0
627	Bacteria	NA	Firmicutes	Bacilli	Lactobacillales	Streptococcaceae	Streptococcus	Streptococcus sanguinis	34	1216	1268	16722	23042	63142	75924	9866	4090	3016	12004	41446	2744	971	1191	1613	11240	29890	7249	6002	10370	23570	15246	2392	25434	2374	20415	2590	28837	7964	16892	1160
628	Viruses	NA	NA	NA	Herpesvirales	Alloherpesviridae	Batrachovirus	Ranid herpesvirus 2	0	0	0	0	0	0	0	0	0	0	0	0	0	0	0	0	0	0	0	0	0	0	0	0	1	0	0	0	0	0	0	0
234	Bacteria	NA	Proteobacteria	Gammaproteobacteria	Pseudomonadales	Pseudomonadaceae	Pseudomonas	Pseudomonas savastanoi	1	3	0	4	0	0	1	0	0	0	31	1	1	0	0	1	0	3	1	29	3	0	0	3	1	3	1	1	0	3	1	1
630	Bacteria	NA	Firmicutes	Bacilli	Lactobacillales	Lactobacillaceae	Lactobacillus	Lactobacillus delbrueckii	42	1	0	0	2	11	4	4	0	0	2	20	0	0	0	4	48	12	17	0	3	6	0	27	12	25	5	0	9	6	3	3
631	Viruses	NA	NA	NA	Caudovirales	Myoviridae	P2likevirus	Mannheimia phage phiMHaA1	0	0	0	0	0	0	0	0	0	0	0	0	0	0	0	1	0	0	0	0	0	0	0	0	0	0	0	0	0	0	0	0
632	Bacteria	NA	Thermotogae	Thermotogae	Thermotogales	Thermotogaceae	Thermosipho	Thermosipho melanesiensis	0	0	0	1	1	0	0	0	0	0	0	0	0	0	0	0	1	0	0	0	1	1	0	0	0	0	0	0	0	0	2	0
633	Viruses	NA	NA	NA	NA	Retroviridae	Deltaretrovirus	Primate T-lymphotropic virus 3	0	0	0	0	0	0	0	0	0	0	0	0	0	0	0	0	0	0	0	1	0	0	0	0	0	0	0	0	0	0	0	0
634	Bacteria	NA	Actinobacteria	Actinobacteria	Actinomycetales	Micromonosporaceae	Salinispora	Salinispora arenicola	1	6	0	1	3	7	63	0	7	0	5	5	0	1	1	0	25	4	47	1	60	22	33	0	4	0	5	1	7	20	13	1
635	Bacteria	NA	Proteobacteria	Alphaproteobacteria	Rhodospirillales	Acetobacteraceae	Granulibacter	Granulibacter bethesdensis	0	2	7	3	0	1	2	5	0	0	25	2	5	13	2	1	2	7	0	21	0	2	5	1	2	3	0	12	0	3	0	1
636	Bacteria	NA	Proteobacteria	Gammaproteobacteria	Vibrionales	NA	NA	Vibrionales bacterium SWAT-3	0	0	1	0	0	1	2	0	0	0	0	1	1	0	3	0	9	3	2	0	8	0	1	0	0	0	30	1	14	1	1	1
637	Bacteria	NA	Proteobacteria	Alphaproteobacteria	Rhodobacterales	Rhodobacteraceae	Roseobacter	Roseobacter sp. GAI101	0	3	1	6	0	0	0	0	0	0	0	0	0	0	0	0	0	3	0	5	0	0	0	1	1	0	0	0	0	1	1	0
638	Bacteria	NA	Proteobacteria	Gammaproteobacteria	Vibrionales	Vibrionaceae	Vibrio	Vibrio shilonii	0	0	1	0	1	1	3	0	1	0	0	2	0	0	0	2	13	9	2	0	17	1	2	0	0	0	70	0	58	3	9	4
639	Bacteria	NA	Proteobacteria	Epsilonproteobacteria	Nautiliales	Nautiliaceae	Caminibacter	Caminibacter mediatlanticus	0	0	0	0	0	0	0	0	0	0	0	0	0	0	0	1	1	0	1	0	1	1	0	0	0	0	2	0	0	1	1	1
640	Bacteria	NA	Proteobacteria	Alphaproteobacteria	Rhodobacterales	Rhodobacteraceae	Roseobacter	Roseobacter sp. CCS2	0	0	0	0	0	0	0	0	0	0	2	0	0	0	0	1	0	0	0	1	0	0	0	0	0	0	0	0	0	1	0	0
641	Bacteria	NA	Bacteroidetes	Sphingobacteriia	Sphingobacteriales	Sphingobacteriaceae	Pedobacter	Pedobacter sp. BAL39	2	0	0	0	0	0	2	0	0	0	0	0	1	0	0	8	1	0	10	0	14	0	5	0	0	3	45	1	38	4	0	0
642	Bacteria	NA	Proteobacteria	Betaproteobacteria	Burkholderiales	Burkholderiaceae	Limnobacter	Limnobacter sp. MED105	1	1	0	0	0	2	1	3	1	0	6	3	0	0	0	1	0	2	7	1	0	0	2	0	0	0	1	0	9	0	1	0
643	Bacteria	NA	Bacteroidetes	Flavobacteriia	Flavobacteriales	NA	NA	Flavobacteria bacterium BAL38	0	0	0	2	0	0	0	2	0	1	0	0	0	0	1	2	9	30	22	1	41	24	21	0	0	0	4	7	19	4	6	5
644	Bacteria	NA	Proteobacteria	Alphaproteobacteria	Caulobacterales	Caulobacteraceae	Brevundimonas	Brevundimonas sp. BAL3	0	6	4	7	2	4	16	6	10	0	11	3	0	10	1	0	4	13	4	9	5	4	2	2	2	3	1	5	2	6	5	5
645	Bacteria	NA	Proteobacteria	Gammaproteobacteria	Xanthomonadales	Xanthomonadaceae	Stenotrophomonas	Stenotrophomonas sp. SKA14	7	26	8	47	1	11	15	29	7	15	32	8	5	9	16	5	27	103	10	20	7	7	2	2	7	1	39	23	10	38	41	17
646	Bacteria	NA	Bacteroidetes	Flavobacteriia	Flavobacteriales	NA	NA	Flavobacteriales bacterium ALC-1	0	0	0	1	0	0	2	0	1	1	0	1	0	0	0	1	7	6	12	1	20	1	0	0	0	0	23	0	5	3	2	0
647	Bacteria	NA	Firmicutes	Clostridia	Thermoanaerobacterales	Thermoanaerobacteraceae	Caldanaerobacter	Caldanaerobacter subterraneus	0	0	0	0	0	0	0	0	0	0	0	2	0	0	0	0	0	0	0	1	1	0	1	0	0	0	1	0	1	0	0	0
648	Bacteria	NA	Cyanobacteria	NA	Chroococcales	NA	Cyanothece	Cyanothece sp. CCY0110	1554	2045	2009	2982	2707	3038	2847	2113	1430	1887	601	1127	1353	1171	645	1165	1119	290	573	2459	1279	828	676	2071	2361	2402	846	1356	1277	1942	1490	1376
649	Bacteria	NA	Proteobacteria	Alphaproteobacteria	Rhodobacterales	Rhodobacteraceae	Roseovarius	Roseovarius sp. TM1035	0	3	1	6	1	0	2	1	1	4	11	1	0	1	2	0	0	4	0	6	2	4	2	0	2	0	1	1	0	1	1	0
650	Bacteria	NA	Proteobacteria	Gammaproteobacteria	NA	NA	NA	gamma proteobacterium HTCC5015	0	0	0	0	0	1	0	0	0	0	0	0	0	0	0	0	0	0	0	1	4	2	1	0	0	0	2	1	0	5	0	0
651	Bacteria	NA	Proteobacteria	Alphaproteobacteria	Rhodobacterales	Rhodobacteraceae	Oceanibulbus	Oceanibulbus indolifex	1	3	0	9	0	0	4	0	1	1	7	0	1	0	0	0	0	2	3	1	2	3	0	0	1	0	2	2	1	2	0	0
652	Bacteria	NA	Proteobacteria	Deltaproteobacteria	Myxococcales	Nannocystaceae	Plesiocystis	Plesiocystis pacifica	0	4	2	4	5	5	13	4	1	0	1	3	2	3	0	1	5	11	28	2	7	8	17	1	3	1	3	0	7	2	6	0
653	Bacteria	NA	Proteobacteria	Betaproteobacteria	Burkholderiales	Comamonadaceae	Verminephrobacter	Verminephrobacter eiseniae	50	62	65	68	18	3	73	107	10	13	80	37	19	86	41	22	29	70	18	49	61	33	30	15	41	9	249	118	53	33	24	27
654	Bacteria	NA	Proteobacteria	Deltaproteobacteria	Desulfovibrionales	Desulfovibrionaceae	Desulfovibrio	Desulfovibrio vulgaris	2	2	0	0	0	1	1	1	0	0	0	0	0	0	0	1	0	3	17	0	13	3	1	0	0	0	0	0	0	1	3	0
655	Bacteria	NA	Proteobacteria	Alphaproteobacteria	Rickettsiales	Rickettsiaceae	Rickettsia	Rickettsia bellii	0	0	0	1	0	0	0	0	0	0	0	0	0	0	0	0	0	2	1	0	1	0	0	0	0	0	1	0	0	1	0	0
656	Bacteria	NA	Actinobacteria	Actinobacteria	Bifidobacteriales	Bifidobacteriaceae	Bifidobacterium	Bifidobacterium longum	1	31	0	87	2	6	842	78	7	14	2	2	0	0	0	0	5	18	23	11	4466	11	9	0	6	0	3	2	9	28	5	7
657	Bacteria	NA	Aquificae	Aquificae	Aquificales	Aquificaceae	Hydrogenivirga	Hydrogenivirga sp. 128-5-R1-1	0	0	0	0	0	0	0	0	0	0	0	0	0	0	0	0	0	0	1	0	0	0	0	0	0	0	1	0	0	1	0	0
658	Bacteria	NA	Proteobacteria	Alphaproteobacteria	Sphingomonadales	Sphingomonadaceae	Sphingomonas	Sphingomonas wittichii	7	17	28	24	6	8	82	105	7	5	86	5	12	42	24	1	12	34	16	51	9	5	15	9	17	6	19	17	6	21	5	5
659	Bacteria	NA	Proteobacteria	Gammaproteobacteria	Alteromonadales	Shewanellaceae	Shewanella	Shewanella woodyi	0	0	0	0	0	0	1	1	0	0	0	0	1	0	1	0	4	0	0	0	9	1	3	0	0	2	14	0	12	0	1	1
660	Bacteria	NA	Firmicutes	Bacilli	Bacillales	Listeriaceae	Listeria	Listeria monocytogenes	0	0	0	0	0	0	0	1	0	0	0	0	0	0	0	0	2	0	0	0	6	1	0	0	1	0	6	0	2	0	0	0
661	Bacteria	NA	Firmicutes	Bacilli	Bacillales	Listeriaceae	Listeria	Listeria monocytogenes	0	0	0	0	0	0	0	0	0	0	0	6	0	0	0	0	0	1	0	0	0	0	0	0	1	0	0	0	0	0	0	0
662	Bacteria	NA	Firmicutes	Bacilli	Bacillales	Listeriaceae	Listeria	Listeria monocytogenes	0	1	0	0	0	0	1	1	0	0	0	10	0	0	0	0	1	0	0	1	1	0	0	0	2	0	4	0	0	1	1	1
663	Bacteria	NA	Firmicutes	Bacilli	Bacillales	Listeriaceae	Listeria	Listeria monocytogenes	0	0	0	0	0	0	0	0	0	0	0	1	0	0	0	0	0	0	0	0	0	0	0	0	0	0	0	0	0	0	0	0
664	Bacteria	NA	Firmicutes	Bacilli	Bacillales	Listeriaceae	Listeria	Listeria monocytogenes	0	0	0	0	0	0	0	0	0	1	0	2	0	0	0	0	0	0	0	0	1	0	0	0	0	0	0	0	0	0	0	1
665	Bacteria	NA	Proteobacteria	Gammaproteobacteria	Enterobacteriales	Enterobacteriaceae	Yersinia	Yersinia enterocolitica	0	0	0	0	0	2	6	0	2	1	7	10	0	0	0	3	16	13	5	5	20	1	3	0	1	1	39	1	35	10	4	2
666	Bacteria	NA	Fusobacteria	Fusobacteriia	Fusobacteriales	Fusobacteriaceae	Fusobacterium	Fusobacterium nucleatum	18	1377	42	105	3410	7837	766	248	1438	77	34	130	102	62	14	731	38315	57034	16805	607	14448	16235	9573	463	688	8	17359	894	13196	20907	5740	16525
667	Bacteria	NA	Proteobacteria	Gammaproteobacteria	Oceanospirillales	Alcanivoracaceae	Alcanivorax	Alcanivorax borkumensis	0	0	1	1	0	0	1	0	0	1	0	0	0	0	0	1	1	2	1	0	1	0	0	0	0	1	2	0	2	0	0	0
668	Viruses	NA	NA	NA	Caudovirales	Myoviridae	Hpunalikevirus	Aeromonas phage phiO18P	0	0	0	0	0	0	0	0	0	0	1	0	0	0	0	0	0	0	0	2	0	0	0	0	0	0	0	0	0	0	0	0
669	Bacteria	NA	Proteobacteria	Alphaproteobacteria	Rhizobiales	Rhizobiaceae	Sinorhizobium	Sinorhizobium fredii	1	1	2	2	1	2	8	4	1	0	10	0	0	1	0	0	0	10	2	2	6	0	5	2	2	1	5	3	1	6	3	3
670	Bacteria	NA	Proteobacteria	Alphaproteobacteria	Rhodobacterales	Hyphomonadaceae	Maricaulis	Maricaulis maris	0	0	1	1	1	1	0	0	0	0	7	0	0	0	0	0	6	6	5	0	4	1	2	0	3	0	2	0	1	0	0	0
671	Bacteria	NA	Firmicutes	Clostridia	Clostridiales	Clostridiaceae	Clostridium	Clostridium cellulolyticum	2	0	0	3	0	0	4	4	0	0	0	25	0	0	2	1	23	37	116	3	70	64	50	1	6	2	30	0	26	59	21	7
672	Eukaryota	Fungi	Ascomycota	Dothideomycetes	Capnodiales	Mycosphaerellaceae	Zasmidium	Zasmidium cellare	0	0	0	0	0	0	0	9	0	0	0	0	0	0	0	0	0	0	0	0	0	0	32	0	0	0	0	0	9	0	0	0
673	Bacteria	NA	Proteobacteria	Betaproteobacteria	Burkholderiales	Burkholderiaceae	Burkholderia	Burkholderia multivorans	19	16	20	42	2	3	47	21	6	2	35	13	6	18	16	4	17	14	13	30	22	35	7	0	10	0	49	22	16	17	9	6
674	Bacteria	NA	Proteobacteria	Alphaproteobacteria	Rhizobiales	Rhizobiaceae	Rhizobium	Rhizobium leguminosarum	1	0	1	3	1	1	4	3	1	0	7	0	1	2	0	0	3	2	5	3	3	3	1	0	0	0	1	5	2	3	2	1
675	Bacteria	NA	Proteobacteria	Betaproteobacteria	Burkholderiales	NA	Leptothrix	Leptothrix cholodnii	0	3	1	5	1	1	27	7	1	0	9	0	2	9	1	0	13	6	17	7	30	32	12	0	7	2	15	1	6	15	6	1
676	Bacteria	NA	Proteobacteria	Alphaproteobacteria	Rhizobiales	Bradyrhizobiaceae	Rhodopseudomonas	Rhodopseudomonas palustris	8	3	31	1	0	2	10	29	0	4	32	6	0	23	7	0	2	42	2	27	39	2	13	1	12	3	44	10	7	10	0	2
677	Bacteria	NA	Cyanobacteria	NA	Chroococcales	NA	Cyanothece	Cyanothece sp. PCC 7425	0	0	0	0	0	0	1	0	0	0	0	0	0	0	0	0	0	0	1	0	0	1	0	0	0	0	0	0	1	0	0	0
678	Bacteria	NA	Cyanobacteria	NA	Chroococcales	NA	Cyanothece	Cyanothece sp. PCC 8802	0	0	0	0	0	0	0	0	0	0	0	4	0	1	0	0	0	6	6	0	0	0	8	1	3	0	0	0	0	0	2	0
679	Bacteria	NA	Proteobacteria	Alphaproteobacteria	Rhizobiales	Beijerinckiaceae	Beijerinckia	Beijerinckia indica	0	0	2	0	0	1	0	2	0	0	10	4	2	5	0	0	0	8	0	7	3	0	1	3	0	1	0	1	0	0	2	0
680	Bacteria	NA	Proteobacteria	Alphaproteobacteria	Rhizobiales	Beijerinckiaceae	Methylocella	Methylocella silvestris	0	1	3	3	0	0	4	1	0	0	6	1	1	3	1	0	3	9	6	4	10	7	2	3	0	3	1	2	2	2	2	1
681	Bacteria	NA	Firmicutes	Bacilli	Bacillales	Staphylococcaceae	Staphylococcus	Staphylococcus carnosus	0	1	2	0	3	3	6	17	2	3	0	35	1	1	3	2	25	29	16	7	35	11	9	6	7	1	42	1	14	3	6	0
682	Bacteria	NA	Proteobacteria	Gammaproteobacteria	Chromatiales	Ectothiorhodospiraceae	Thioalkalivibrio	Thioalkalivibrio sp. K90mix	0	0	0	1	0	1	10	2	0	0	3	1	0	1	0	0	0	0	3	2	4	1	1	0	1	0	5	1	2	3	0	0
683	Bacteria	NA	Proteobacteria	Betaproteobacteria	Burkholderiales	Burkholderiaceae	Burkholderia	Burkholderia ambifaria	0	0	0	0	0	0	0	0	2	0	2	0	0	0	1	0	0	0	0	2	2	0	1	0	1	2	0	0	1	2	0	0
684	Bacteria	NA	Proteobacteria	Betaproteobacteria	Burkholderiales	Burkholderiaceae	Burkholderia	Burkholderia ambifaria	0	0	1	0	0	0	2	1	0	0	1	0	0	1	0	0	1	4	4	0	0	0	1	0	0	0	0	1	0	0	2	0
685	Bacteria	NA	Proteobacteria	Betaproteobacteria	Burkholderiales	Burkholderiaceae	Burkholderia	Burkholderia graminis	0	0	0	0	0	1	0	0	1	2	6	2	2	3	0	0	1	2	3	2	2	1	2	1	5	0	5	3	0	2	0	0
686	Eukaryota	NA	NA	NA	Euglyphida	Paulinellidae	Paulinella	Paulinella chromatophora	0	0	0	0	0	0	1	0	0	0	0	0	0	1	0	0	0	3	0	0	0	2	0	0	1	0	2	1	0	1	3	0
687	Bacteria	NA	Proteobacteria	Betaproteobacteria	Burkholderiales	Comamonadaceae	Acidovorax	Acidovorax citrulli	8	4	16	7	2	4	24	17	2	0	13	6	6	8	2	1	9	17	21	8	14	27	14	3	5	1	15	19	15	11	3	3
688	Archaea	NA	Crenarchaeota	Thermoprotei	Thermoproteales	Thermoproteaceae	Caldivirga	Caldivirga maquilingensis	0	1	1	0	0	0	0	0	0	0	0	0	0	0	0	0	0	0	0	0	0	0	0	0	0	0	0	0	0	0	0	0
689	Bacteria	NA	Firmicutes	Bacilli	Bacillales	Bacillaceae	Bacillus	Bacillus pseudofirmus	0	0	0	0	1	0	0	0	0	0	0	0	0	0	0	0	0	0	1	0	0	0	0	0	0	0	0	1	0	0	0	0
690	Bacteria	NA	Proteobacteria	Betaproteobacteria	Burkholderiales	Burkholderiaceae	Burkholderia	Burkholderia ambifaria	1	2	5	0	0	1	12	2	1	0	5	0	5	2	2	1	5	6	0	11	6	3	4	1	5	0	16	3	1	5	3	1
691	Bacteria	NA	Proteobacteria	Betaproteobacteria	Burkholderiales	Comamonadaceae	Delftia	Delftia acidovorans	216536	341649	350325	354159	94419	56797	205859	626464	69050	61742	443076	230971	148047	426916	217053	114490	170769	384119	44862	266797	39082	177437	158810	96032	170709	29870	1383818	643447	258507	235862	98498	115437
692	Bacteria	NA	Proteobacteria	Gammaproteobacteria	Alteromonadales	Shewanellaceae	Shewanella	Shewanella pealeana	0	0	2	0	1	0	0	1	0	1	1	1	0	0	0	2	4	9	7	0	6	1	0	0	2	0	16	0	9	1	4	1
693	Bacteria	NA	Proteobacteria	Alphaproteobacteria	Rhodobacterales	Rhodobacteraceae	Dinoroseobacter	Dinoroseobacter shibae	4	11	2	28	2	1	11	9	4	14	31	1	1	2	3	0	0	3	7	17	5	1	0	3	0	0	1	3	2	2	1	0
694	Bacteria	NA	Proteobacteria	Deltaproteobacteria	Desulfuromonadales	Geobacteraceae	Geobacter	Geobacter lovleyi	0	0	0	1	0	0	2	0	1	0	0	0	0	0	0	0	2	1	5	1	2	1	7	0	2	0	0	0	0	2	1	0
695	Viruses	NA	NA	NA	Caudovirales	Siphoviridae	NA	Staphylococcus phage PH15	0	0	0	0	0	0	0	0	0	0	0	0	0	0	0	0	0	0	0	0	0	0	0	0	0	0	0	0	0	0	1	0
696	Bacteria	NA	Proteobacteria	Gammaproteobacteria	Alteromonadales	Shewanellaceae	Shewanella	Shewanella baltica	0	0	1	1	0	3	1	0	0	0	1	0	0	0	0	4	10	2	0	1	5	1	0	0	3	0	25	1	6	1	3	1
697	Bacteria	NA	Firmicutes	Clostridia	Thermoanaerobacterales	Thermoanaerobacteraceae	Thermoanaerobacter	Thermoanaerobacter sp. X514	0	0	0	0	0	0	0	2	0	0	0	0	0	0	0	0	0	0	0	0	0	0	0	0	0	2	0	0	0	0	1	3
599	Bacteria	NA	Proteobacteria	Gammaproteobacteria	Pseudomonadales	Pseudomonadaceae	Pseudomonas	Pseudomonas stutzeri	349	571	10	5087	650	697	376	625	242	324	1043	206	10	12	293	47	236	18	6	1687	12	17	15	148	20	60	70	71	24	46	13	11
699	Bacteria	NA	Proteobacteria	Gammaproteobacteria	Enterobacteriales	Enterobacteriaceae	Serratia	Serratia proteamaculans	0	1	0	0	0	0	8	2	2	0	35	2	1	0	0	2	14	16	2	53	22	5	4	3	0	2	32	2	45	94	3	4
700	Bacteria	NA	Proteobacteria	Gammaproteobacteria	Enterobacteriales	Enterobacteriaceae	Enterobacter	Enterobacter sp. 638	0	1	3	0	1	1	4	0	0	0	272	3	1	0	1	1	17	8	4	553	22	1	0	35	0	51	14	8	4	4	3	5
701	Viruses	NA	NA	NA	NA	Phycodnaviridae	Chlorovirus	Paramecium bursaria Chlorella virus A1	1	5	8	3	0	0	0	1	0	0	1	0	0	0	2	0	0	1	0	0	0	0	0	0	1	0	0	0	0	4	0	0
702	Bacteria	NA	Proteobacteria	Betaproteobacteria	Burkholderiales	Comamonadaceae	Comamonas	Comamonas testosteroni	50	105	143	181	27	72	90	132	41	29	236	57	58	213	127	27	70	280	28	28	17	19	13	7	9	2	146	64	25	35	3	10
703	Bacteria	NA	Firmicutes	Bacilli	Lactobacillales	Streptococcaceae	Streptococcus	Streptococcus equi	11	20	41	106	215	326	388	565	260	610	70	3859	54	6	29	85	953	784	1958	136	2868	2946	1124	196	467	751	1566	51	2666	1258	320	315
704	Bacteria	NA	Proteobacteria	Gammaproteobacteria	Pseudomonadales	Moraxellaceae	Acinetobacter	Acinetobacter baumannii	0	1	1	1	0	0	2	3	34	45	22	0	1	3	15	3	9	131	1	132	5	25	0	13	0	24	17	2	30	25	1	6
705	Eukaryota	NA	NA	Dinophyceae	Peridiniales	Peridiniaceae	Durinskia	Durinskia baltica	0	0	0	0	0	0	0	0	0	0	0	0	0	0	0	0	0	1	1	0	0	1	0	1	0	0	1	0	0	0	0	0
706	Bacteria	NA	Actinobacteria	Actinobacteria	Bifidobacteriales	Bifidobacteriaceae	Bifidobacterium	Bifidobacterium dentium	940	0	0	0	0	0	0	0	0	0	0	0	0	0	0	0	0	0	0	0	0	0	0	0	171	0	0	0	0	398	0	0
707	Bacteria	NA	Firmicutes	Negativicutes	Selenomonadales	Veillonellaceae	Thermosinus	Thermosinus carboxydivorans	4	0	0	3	1	3	6	9	0	0	1	34	0	5	0	2	3	24	190	2	50	33	82	2	9	4	1	0	3	44	18	2
708	Bacteria	NA	Proteobacteria	Gammaproteobacteria	Thiotrichales	Francisellaceae	Francisella	Francisella tularensis	0	0	0	0	0	0	0	0	0	0	1	2	0	0	0	0	0	0	0	0	1	0	0	0	0	0	5	0	0	0	0	0
709	Bacteria	NA	Firmicutes	Bacilli	Bacillales	Listeriaceae	Listeria	Listeria monocytogenes	0	0	0	0	0	0	0	0	0	0	0	0	0	0	0	0	0	4	2	0	0	0	0	0	0	0	0	0	0	0	2	0
710	Bacteria	NA	Proteobacteria	Betaproteobacteria	Burkholderiales	Burkholderiaceae	Ralstonia	Ralstonia pickettii	947	1544	1614	1468	403	286	1006	2604	288	281	2009	1098	767	1964	1025	587	750	1713	245	1451	293	886	751	436	758	147	6264	2966	1405	1063	428	633
711	Archaea	NA	Euryarchaeota	Methanococci	Methanococcales	Methanococcaceae	Methanococcus	Methanococcus maripaludis	0	0	0	0	0	0	0	0	0	0	0	0	0	0	0	0	0	1	0	0	0	0	0	0	0	0	0	0	0	0	0	0
712	Bacteria	NA	Proteobacteria	Alphaproteobacteria	Rhizobiales	Rhodobiaceae	Parvibaculum	Parvibaculum lavamentivorans	2	2	4	5	0	0	1	1	1	1	4	7	3	4	0	1	0	3	21	7	10	1	3	6	5	0	4	1	0	5	1	0
713	Bacteria	NA	Thermotogae	Thermotogae	Thermotogales	Thermotogaceae	Petrotoga	Petrotoga mobilis	0	0	0	1	0	0	0	0	0	0	0	0	0	0	0	0	0	3	0	0	1	0	2	0	0	0	5	0	0	0	1	1
714	Viruses	NA	NA	NA	Caudovirales	Siphoviridae	NA	Streptococcus phage P9	0	0	0	0	0	0	0	0	0	0	0	0	0	0	0	0	2	2	0	0	3	1	0	0	0	0	0	0	0	0	0	1
715	Bacteria	NA	Proteobacteria	Deltaproteobacteria	Desulfuromonadales	Geobacteraceae	Geobacter	Geobacter bemidjiensis	0	0	1	1	0	4	6	0	1	0	0	1	0	1	0	0	0	2	9	1	8	3	3	1	1	0	11	0	16	2	21	1
716	Bacteria	NA	Proteobacteria	Deltaproteobacteria	Myxococcales	Myxococcaceae	Anaeromyxobacter	Anaeromyxobacter sp. Fw109-5	1	1	1	1	0	1	35	3	2	0	0	2	0	1	0	2	1	4	10	3	30	1	3	1	6	0	4	2	4	6	21	1
717	Viruses	NA	NA	NA	NA	Papillomaviridae	Gammapapillomavirus	Gammapapillomavirus 3	0	0	0	0	0	0	0	0	0	0	0	0	0	0	0	1	0	0	0	0	0	0	0	0	0	0	0	0	0	0	0	0
718	Bacteria	NA	Firmicutes	Bacilli	Bacillales	Bacillaceae	Bacillus	Bacillus cereus	0	0	0	0	0	0	0	0	0	1	0	12	0	0	1	0	2	3	0	0	3	0	0	1	3	0	2	0	9	0	0	0
719	Bacteria	NA	Firmicutes	Bacilli	Bacillales	Bacillaceae	Bacillus	Bacillus cereus	0	0	0	0	0	0	0	0	0	0	0	0	0	0	0	2	1	7	3	0	0	8	0	0	0	0	7	0	0	0	1	0
720	Bacteria	NA	Firmicutes	Bacilli	Bacillales	Bacillaceae	Bacillus	Bacillus cereus	0	0	0	0	0	0	1	0	0	0	0	1	0	0	0	0	2	3	3	1	3	0	0	0	0	0	7	0	2	0	4	0
721	Bacteria	NA	Firmicutes	Bacilli	Bacillales	Bacillaceae	Bacillus	Bacillus cereus	0	0	0	0	1	0	0	10	0	0	0	31	0	0	0	1	4	2	8	5	29	0	4	0	2	0	3	0	12	0	5	0
722	Bacteria	NA	Firmicutes	Bacilli	Bacillales	Bacillaceae	Bacillus	Bacillus cereus	0	0	0	0	0	0	0	0	0	0	0	0	0	0	0	0	0	0	1	0	0	1	0	0	0	0	0	0	0	0	0	0
723	Bacteria	NA	Firmicutes	Bacilli	Bacillales	Bacillaceae	Bacillus	Bacillus anthracis	0	0	0	0	0	0	0	0	0	0	0	0	0	0	0	0	1	0	0	0	0	1	0	0	0	0	2	0	0	0	0	0
724	Bacteria	NA	Firmicutes	Bacilli	Bacillales	Bacillaceae	Bacillus	Bacillus cereus	0	0	0	0	0	0	0	0	0	0	0	6	0	0	0	0	1	3	1	0	0	12	1	0	0	0	1	0	1	1	1	3
725	Bacteria	NA	Actinobacteria	Actinobacteria	Actinomycetales	Pseudonocardiaceae	Saccharopolyspora	Saccharopolyspora erythraea	0	42	1	7	10	26	192	19	28	3	3	30	1	3	1	0	21	33	32	6	47	136	53	3	34	5	10	9	2	39	8	3
726	Archaea	NA	Euryarchaeota	Methanococci	Methanococcales	Methanococcaceae	Methanococcus	Methanococcus vannielii	0	0	0	0	0	0	0	0	0	0	0	0	0	0	0	0	0	0	1	0	2	0	1	0	0	0	0	0	0	0	0	0
727	Bacteria	NA	Proteobacteria	Betaproteobacteria	Burkholderiales	Burkholderiaceae	Burkholderia	Burkholderia cenocepacia	0	0	2	0	0	0	4	11	1	0	1	0	4	1	1	6	3	0	2	4	33	1	0	0	4	0	3	1	1	1	0	0
728	Bacteria	NA	Proteobacteria	Gammaproteobacteria	Enterobacteriales	Enterobacteriaceae	Xenorhabdus	Xenorhabdus nematophila	0	1	1	1	0	0	1	1	0	0	1	4	1	0	1	2	14	8	6	3	8	5	3	1	2	0	18	2	46	3	4	3
729	Bacteria	NA	Proteobacteria	Gammaproteobacteria	Enterobacteriales	Enterobacteriaceae	Xenorhabdus	Xenorhabdus bovienii	0	0	1	0	1	1	10	0	2	0	2	10	0	1	0	1	18	10	7	0	29	1	13	2	1	0	70	0	43	6	6	2
730	Viruses	NA	NA	NA	Caudovirales	Myoviridae	NA	Thermus phage phiYS40	0	0	0	0	0	0	0	0	0	0	0	0	0	0	0	0	0	0	0	1	0	0	0	0	0	0	0	0	0	0	0	0
731	Bacteria	NA	Proteobacteria	Gammaproteobacteria	Enterobacteriales	Enterobacteriaceae	Escherichia	Escherichia coli	3088	122	3545	4	1261	836	2687	7067	17	822	6562	3500	2785	7309	3168	5	3112	5587	8	5416	1	3038	2707	0	1992	538	18537	5728	4450	3962	1445	3588
732	Bacteria	NA	Actinobacteria	Actinobacteria	Actinomycetales	Mycobacteriaceae	Mycobacterium	Mycobacterium bovis	0	0	0	0	0	0	0	0	1	0	0	6	0	0	0	0	0	10	0	4	12	1	0	0	13	0	3	0	0	0	5	0
733	Archaea	NA	Euryarchaeota	Methanomicrobia	Methanomicrobiales	Methanocorpusculaceae	Methanocorpusculum	Methanocorpusculum labreanum	0	0	0	0	0	0	0	0	0	0	0	0	0	0	0	0	0	0	1	1	1	0	0	0	0	0	0	0	0	2	0	0
734	Archaea	NA	Crenarchaeota	Thermoprotei	Thermoproteales	Thermoproteaceae	Pyrobaculum	Pyrobaculum calidifontis	1	0	0	0	0	0	1	0	0	0	0	0	0	0	0	0	0	0	0	0	1	0	0	0	0	0	0	0	0	0	0	0
735	Bacteria	NA	Bacteroidetes	Flavobacteriia	Flavobacteriales	Flavobacteriaceae	Gramella	Gramella forsetii	0	0	0	0	0	3	2	0	0	0	0	0	0	1	0	0	12	2	6	0	109	0	0	0	0	0	6	1	2	1	0	0
736	Bacteria	NA	Firmicutes	Clostridia	Clostridiales	Lachnospiraceae	Dorea	Dorea formicigenerans	1	42	2	55	7	8	86	373	128	85	12	390	2	2	1	1	115	112	602	163	339	409	872	316	43	22	753	1	178	1441	60	30
737	Bacteria	NA	Firmicutes	Clostridia	Clostridiales	NA	Pseudoflavonifractor	Pseudoflavonifractor capillosus	1	5	3	19	11	6	21	60	14	4	11	205	5	17	1	1	555	180	466	21	109	628	1275	31	40	0	105	1	218	228	26	3
738	Bacteria	NA	Firmicutes	Clostridia	Clostridiales	Eubacteriaceae	Eubacterium	Eubacterium hallii	35	1135	38	89	17	45	11	14	21	141	0	188	1	3	2	0	69	124	187	173	117	130	120	8	16	2697	234	6	55	111	39	20
739	Bacteria	NA	Firmicutes	Clostridia	Clostridiales	Lachnospiraceae	Blautia	[Ruminococcus] gnavus	0	5	260	72	52	241	414	23	14	2	273	136	310	2	3	62	185	34	833	2	1070	2284	930	48	76	61	1742	1	1411	344	79	32
740	Bacteria	NA	Bacteroidetes	Bacteroidia	Bacteroidales	Bacteroidaceae	Bacteroides	Bacteroides uniformis	1	3	0	1	18	10	24	19	0	2	0	24	4	1	2	10	629	41	35	56	85	44	102	1	3	2378	60	2	26	72	36	12
741	Bacteria	NA	Actinobacteria	Actinobacteria	Bifidobacteriales	Bifidobacteriaceae	Bifidobacterium	Bifidobacterium adolescentis	6	2	3	5	3	8	29	5	5	0	1	15	2	1	0	1	17	35	54	6	52	34	26	3	24	2	7	1	2	13	6	0
742	Bacteria	NA	Firmicutes	Clostridia	Clostridiales	Clostridiaceae	Clostridium	Clostridium sp. M62/1	0	16	2	32	7	6	20	72	21	2	45	567	2	10	24	29	1459	1088	1955	161	1440	8118	5095	113	246	36	913	40	422	626	52	41
743	Bacteria	NA	Bacteroidetes	Bacteroidia	Bacteroidales	Bacteroidaceae	Bacteroides	Bacteroides caccae	1	1	0	1	3	8	6	23	2	0	0	25	4	0	1	0	125	128	206	0	226	29	214	27	5	3	68	2	59	70	53	59
744	Bacteria	NA	Actinobacteria	Actinobacteria	Coriobacteriales	Coriobacteriaceae	Collinsella	Collinsella aerofaciens	13	12	7	70	3	15	46	15	4	19	7	99	0	3	0	1	13	99	186	117	1851	272	169	15	258	50	163	4	7	43	16	2
745	Bacteria	NA	Proteobacteria	Betaproteobacteria	Burkholderiales	Burkholderiaceae	Burkholderia	Burkholderia mallei	0	0	1	3	0	0	0	1	0	0	2	1	0	0	0	0	0	1	1	3	2	1	1	0	3	0	0	0	0	0	0	0
746	Eukaryota	NA	NA	Oligohymenophorea	Peniculida	Parameciidae	Paramecium	Paramecium tetraurelia	0	0	0	0	0	0	0	0	0	0	0	0	0	0	0	0	0	0	0	0	0	1	0	0	0	0	0	0	0	0	0	0
747	Bacteria	NA	Spirochaetes	Spirochaetia	Spirochaetales	Spirochaetaceae	Borrelia	Borrelia recurrentis	0	0	0	0	0	0	0	0	1	0	0	0	0	0	0	0	0	0	0	0	0	0	0	0	0	0	0	0	0	0	0	0
748	Bacteria	NA	Spirochaetes	Spirochaetia	Spirochaetales	Spirochaetaceae	Borrelia	Borrelia duttonii	0	0	0	1	0	0	0	0	0	0	0	0	0	0	0	0	0	0	0	0	0	0	0	0	0	0	0	0	0	0	0	0
749	Bacteria	NA	Firmicutes	Bacilli	Bacillales	Bacillaceae	Bacillus	Bacillus thuringiensis	0	0	0	1	0	0	0	7	0	2	0	19	0	0	0	0	2	0	1	3	4	1	2	1	2	0	10	0	2	0	1	0
750	Eukaryota	Fungi	Ascomycota	Dothideomycetes	NA	NA	Catinella	Catinella olivacea	0	0	0	1	0	0	0	0	0	0	0	0	0	0	0	0	0	0	0	0	0	1	0	0	0	0	0	0	0	0	0	0
751	Bacteria	NA	Proteobacteria	Gammaproteobacteria	Vibrionales	Vibrionaceae	Vibrio	Vibrio cholerae	0	0	0	0	0	0	0	1	0	0	0	1	0	0	0	0	3	3	0	0	0	0	0	0	1	0	2	0	2	0	0	0
752	Bacteria	NA	Proteobacteria	Gammaproteobacteria	NA	NA	NA	Calyptogena okutanii thioautotrophic gill symbiont	0	0	0	0	0	0	0	0	0	0	0	1	0	0	0	0	1	0	0	0	2	0	0	0	0	0	1	0	0	0	1	0
753	Bacteria	NA	Proteobacteria	Gammaproteobacteria	Vibrionales	Vibrionaceae	Vibrio	Vibrio cholerae	0	0	0	1	0	0	0	0	0	0	0	0	0	0	0	1	2	3	0	0	2	0	0	0	0	0	2	0	9	1	3	0
754	Bacteria	NA	Proteobacteria	Gammaproteobacteria	NA	NA	NA	Candidatus Ruthia magnifica	0	0	0	0	0	0	0	0	0	0	0	0	0	0	0	0	0	1	0	0	2	0	0	0	0	0	3	0	1	0	0	0
755	Eukaryota	NA	Apicomplexa	Coccidia	Eucoccidiorida	Eimeriidae	Eimeria	Eimeria tenella	0	0	0	0	0	0	0	0	0	0	0	0	0	0	0	0	0	0	0	0	0	0	0	0	0	0	1	0	0	0	0	0
756	Bacteria	NA	Cyanobacteria	NA	Chroococcales	NA	Cyanothece	Cyanothece sp. PCC 8801	0	0	0	1	0	0	1	0	0	0	0	0	0	0	0	0	0	0	0	0	0	7	0	0	0	0	0	0	0	5	0	0
757	Bacteria	NA	Proteobacteria	Alphaproteobacteria	Rhodospirillales	Rhodospirillaceae	Rhodospirillum	Rhodospirillum centenum	3	5	9	6	0	7	63	5	4	1	10	4	2	10	1	3	8	24	14	26	2	20	6	2	9	5	7	5	4	3	2	3
758	Archaea	NA	Crenarchaeota	Thermoprotei	Desulfurococcales	Pyrodictiaceae	Hyperthermus	Hyperthermus butylicus	0	0	0	0	0	0	0	0	0	0	0	0	0	0	0	0	0	0	1	0	0	0	0	0	0	0	0	0	1	0	0	0
759	Bacteria	NA	Proteobacteria	Alphaproteobacteria	Rickettsiales	Rickettsiaceae	Rickettsia	Rickettsia massiliae	0	0	0	0	0	0	3	1	0	0	0	0	0	0	0	0	0	0	0	0	0	0	0	0	0	0	0	0	1	0	0	0
760	Archaea	NA	Euryarchaeota	Halobacteria	Halobacteriales	Halobacteriaceae	Halorubrum	Halorubrum lacusprofundi	0	0	0	0	0	1	3	0	1	0	0	0	0	0	0	0	1	1	1	1	1	0	0	0	1	0	0	0	0	0	0	0
761	Bacteria	NA	Thermotogae	Thermotogae	Thermotogales	Thermotogaceae	Thermotoga	Thermotoga lettingae	0	0	0	0	0	0	0	0	0	0	0	0	0	0	0	0	0	0	0	0	0	0	1	0	0	0	0	0	0	0	0	0
762	Bacteria	NA	Firmicutes	Bacilli	Lactobacillales	Streptococcaceae	Lactococcus	Lactococcus lactis	9	2	11	8	5	4	37	153	9	204	8	726	1	1	10	4	219	229	202	53	80	139	71	21	96	9	81	8	80	25	18	4
763	Bacteria	NA	Proteobacteria	Gammaproteobacteria	Vibrionales	Vibrionaceae	Vibrio	Vibrio cholerae	1	2	4	1	1	0	2	0	0	0	1	0	2	1	0	0	1	0	0	7	1	21	0	0	4	0	6	0	1	1	0	0
764	Eukaryota	Viridiplantae	Chlorophyta	Prasinophyceae	Pseudoscourfieldiales	Pycnococcaceae	Pycnococcus	Pycnococcus provasolii	0	0	0	0	0	0	0	0	0	0	0	0	0	0	0	0	0	0	1	0	1	1	0	0	0	0	0	0	0	0	0	0
765	Bacteria	NA	Firmicutes	Bacilli	Bacillales	Bacillaceae	Geobacillus	Geobacillus thermodenitrificans	0	0	1	0	0	3	2	0	1	0	0	4	0	0	0	0	0	2	4	1	2	0	3	1	0	1	2	0	3	1	2	0
766	Archaea	NA	Euryarchaeota	Methanobacteria	Methanobacteriales	Methanobacteriaceae	Methanobrevibacter	Methanobrevibacter smithii	0	0	0	0	0	0	0	0	0	0	0	0	0	0	0	0	0	0	0	0	0	0	0	0	0	0	1	0	0	0	0	0
767	Bacteria	NA	Firmicutes	Clostridia	Clostridiales	NA	Epulopiscium	Epulopiscium sp. 'N.t. morphotype B'	0	0	0	0	0	0	0	0	0	0	0	0	0	0	0	0	0	0	0	0	0	0	0	0	0	0	0	0	0	1	0	0
768	Bacteria	NA	Proteobacteria	Betaproteobacteria	Burkholderiales	NA	Methylibium	Methylibium petroleiphilum	3	2	5	1	0	15	39	7	7	0	7	4	4	6	8	1	15	16	7	13	29	19	8	4	8	1	22	5	10	11	1	3
769	Bacteria	NA	Proteobacteria	Gammaproteobacteria	Legionellales	Legionellaceae	Legionella	Legionella pneumophila	0	0	0	1	0	0	1	0	0	0	0	0	1	0	0	0	0	0	0	0	1	1	0	0	2	0	0	0	1	1	0	0
770	Viruses	NA	NA	NA	Caudovirales	Siphoviridae	NA	Streptococcus phage phi3396	0	0	0	0	0	11	13	3	0	32	0	0	0	0	1	0	0	0	0	0	3	0	3	0	0	0	1	0	0	0	0	0
771	Eukaryota	Fungi	Ascomycota	Eurotiomycetes	Eurotiales	Aspergillaceae	Aspergillus	Aspergillus niger	43	95	0	1	1	1	3	0	2	1	4	23	1	0	3	4	1	93	1	7	1	50	1	3	3	4	4	1	3	2	36	6
772	Bacteria	NA	Proteobacteria	Betaproteobacteria	Burkholderiales	Burkholderiaceae	Burkholderia	Burkholderia pseudomallei	1	0	3	0	0	1	5	1	0	0	5	1	1	1	0	0	5	4	5	3	11	1	3	0	2	0	1	2	1	4	2	0
773	Bacteria	NA	Proteobacteria	Gammaproteobacteria	Alteromonadales	Shewanellaceae	Shewanella	Shewanella sediminis	0	0	0	0	0	0	1	0	0	0	0	1	2	0	0	0	7	3	0	2	5	1	2	0	0	0	8	3	13	0	1	0
774	Bacteria	NA	Proteobacteria	Alphaproteobacteria	Rhizobiales	Methylobacteriaceae	Methylobacterium	Methylobacterium sp. 4-46	1	0	5	5	2	9	25	9	4	1	11	1	1	5	2	0	2	8	8	8	4	16	8	1	8	1	7	0	2	7	8	1
775	Bacteria	NA	Proteobacteria	Alphaproteobacteria	Rhizobiales	Methylobacteriaceae	Methylobacterium	Methylobacterium radiotolerans	2	14	13	6	4	7	54	11	7	2	19	16	6	44	5	1	15	40	35	37	36	171	33	4	56	3	23	3	39	13	1	6
776	Archaea	NA	Euryarchaeota	Methanococci	Methanococcales	Methanococcaceae	Methanococcus	Methanococcus maripaludis	0	0	0	0	0	0	0	0	0	0	0	0	0	0	0	0	0	0	0	0	0	0	0	1	0	0	0	0	0	0	0	0
777	Bacteria	NA	Proteobacteria	Gammaproteobacteria	Xanthomonadales	Xanthomonadaceae	Xanthomonas	Xanthomonas fuscans	6	11	8	13	5	4	9	23	1	0	13	2	3	24	4	4	5	16	5	2	0	4	2	1	2	1	35	25	4	4	4	2
778	Bacteria	NA	Proteobacteria	Gammaproteobacteria	Xanthomonadales	Xanthomonadaceae	Xanthomonas	Xanthomonas fuscans	0	1	0	2	0	0	1	2	1	0	2	0	2	1	0	0	2	1	1	1	2	1	1	0	0	0	6	2	1	0	1	0
779	Eukaryota	NA	NA	NA	Slopalinida	Proteromonadidae	Proteromonas	Proteromonas lacertae	0	0	0	0	0	0	0	0	0	0	0	0	0	0	0	0	0	1	0	0	0	0	0	0	0	0	0	0	0	0	0	0
780	Bacteria	NA	Firmicutes	Clostridia	Thermoanaerobacterales	Thermoanaerobacteraceae	Ammonifex	Ammonifex degensii	1	1	0	0	0	1	2	0	0	2	1	0	1	0	0	0	0	1	1	1	0	0	1	0	0	0	1	0	1	1	0	0
781	Viruses	NA	NA	NA	NA	Potyviridae	Potyvirus	Onion yellow dwarf virus	0	0	0	0	1	0	0	0	0	0	0	0	0	0	0	0	0	0	0	0	0	0	0	0	0	0	0	0	0	0	0	0
782	Viruses	NA	NA	NA	Caudovirales	Myoviridae	Bcepmulikevirus	Burkholderia phage phiE255	0	0	0	0	0	0	0	0	0	0	0	0	0	0	0	0	0	0	0	0	0	0	0	0	0	0	1	0	0	0	0	0
783	Bacteria	NA	Firmicutes	Clostridia	Clostridiales	Clostridiaceae	Clostridium	Clostridium kluyveri	0	1	0	1	1	2	1	1	0	0	0	5	1	0	2	0	8	28	12	3	11	39	7	0	1	1	7	0	4	5	4	2
784	Bacteria	NA	Proteobacteria	Gammaproteobacteria	Enterobacteriales	Enterobacteriaceae	Escherichia	Escherichia coli	40	74	69	50	15	9	13	99	0	1	91	0	44	5	0	0	4	59	43	121	27	35	7	41	0	6	132	68	98	48	10	2
785	Bacteria	NA	Bacteroidetes	Bacteroidia	Bacteroidales	Porphyromonadaceae	Porphyromonas	Porphyromonas gingivalis	213	253	26	66	20016	689	27812	87	119	1172	40	24	166	44	88	11651	865	2374	1065	3792	2661	99	596	166	63	1128	4371	1091	2468	902	515	1823
786	Bacteria	NA	Aquificae	Aquificae	Aquificales	Hydrogenothermaceae	Sulfurihydrogenibium	Sulfurihydrogenibium yellowstonense	0	0	0	0	0	0	0	0	0	0	0	0	0	0	0	0	0	0	0	0	0	1	0	0	0	0	0	0	0	0	0	0
787	Bacteria	NA	Proteobacteria	Alphaproteobacteria	Rickettsiales	Anaplasmataceae	Neorickettsia	Neorickettsia risticii	0	0	1	0	0	0	0	0	0	0	0	0	0	0	0	0	0	0	0	0	0	0	0	0	0	0	0	0	0	0	0	0
788	Bacteria	NA	Proteobacteria	Gammaproteobacteria	Legionellales	Coxiellaceae	Coxiella	Coxiella burnetii	0	0	0	0	0	0	0	0	0	0	0	0	0	0	0	0	1	1	0	0	3	0	1	0	0	0	0	0	0	0	0	0
789	Bacteria	NA	Bacteroidetes	Bacteroidia	Bacteroidales	Bacteroidaceae	Bacteroides	Bacteroides vulgatus	1	2	2	11	11	7	24	19	2	2	0	92	1	2	6	15	12	121	368	15	522	130	227	17	3	9	181	5	167	117	131	5
790	Bacteria	NA	Bacteroidetes	Bacteroidia	Bacteroidales	Porphyromonadaceae	Parabacteroides	Parabacteroides distasonis	0	9	1	0	14	17	14	7	4	3	0	15	18	0	4	9	87	300	470	4	269	48	112	6	2	54	389	4	263	97	19	37
791	Eukaryota	Viridiplantae	Chlorophyta	Mamiellophyceae	Mamiellales	NA	Ostreococcus	Ostreococcus 'lucimarinus'	16	199	16	12	230	124	35	10	12	64	4	6	133	93	104	148	9	22	6	12	6	274	57	10	4	6	4	4	2	6	0	6
792	Bacteria	NA	Aquificae	Aquificae	Aquificales	Hydrogenothermaceae	Sulfurihydrogenibium	Sulfurihydrogenibium sp. YO3AOP1	0	0	0	1	0	0	0	0	0	0	0	1	0	0	0	0	0	0	0	0	2	1	0	0	0	0	0	1	0	0	0	0
793	Archaea	NA	Thaumarchaeota	NA	Nitrosopumilales	Nitrosopumilaceae	Nitrosopumilus	Nitrosopumilus maritimus	0	0	0	0	0	0	0	0	0	0	0	1	0	0	0	0	0	0	0	0	0	0	0	0	0	0	0	0	0	0	0	0
794	Bacteria	NA	Proteobacteria	Gammaproteobacteria	Pseudomonadales	Moraxellaceae	Acinetobacter	Acinetobacter oleivorans	0	3	0	0	1	2	1	2	6	3	159	1	3	1	1	1	6	6	1	345	8	8	2	6	6	31	23	2	29	2	3	4
795	Viruses	NA	NA	NA	Caudovirales	Siphoviridae	NA	Lactococcus phage r1t	0	0	0	0	0	0	0	0	0	0	0	0	0	0	0	0	0	0	2	0	0	3	0	0	0	0	0	0	0	0	0	0
796	Bacteria	NA	Proteobacteria	Alphaproteobacteria	Rhizobiales	Xanthobacteraceae	Azorhizobium	Azorhizobium caulinodans	3	5	20	10	2	3	12	5	6	1	38	1	4	15	3	1	5	10	7	43	8	6	6	6	21	2	20	11	6	6	4	0
797	Bacteria	NA	Proteobacteria	Deltaproteobacteria	Desulfobacterales	Desulfobacteraceae	Desulfatibacillum	Desulfatibacillum alkenivorans	0	0	0	1	1	0	1	0	0	0	0	2	0	0	0	0	0	0	3	0	0	1	0	0	1	0	1	0	1	0	0	0
798	Bacteria	NA	Firmicutes	Bacilli	Bacillales	Bacillaceae	Bacillus	Bacillus selenitireducens	0	0	0	0	0	0	4	1	1	0	0	11	0	0	0	0	0	5	5	0	7	0	5	1	0	1	3	0	3	4	1	0
799	Bacteria	NA	Proteobacteria	Alphaproteobacteria	NA	NA	Candidatus Pelagibacter	Candidatus Pelagibacter sp. HTCC7211	0	0	0	0	0	0	1	0	0	0	0	0	0	0	0	0	1	1	0	0	0	1	0	0	0	0	0	0	0	0	0	0
800	Bacteria	NA	Proteobacteria	Alphaproteobacteria	Rhodobacterales	Rhodobacteraceae	Pseudovibrio	Pseudovibrio sp. JE062	0	1	0	0	0	1	0	0	0	0	0	1	0	0	0	0	5	2	3	0	4	0	3	0	1	0	2	0	0	2	0	0
801	Bacteria	NA	Proteobacteria	Alphaproteobacteria	Rhodobacterales	NA	NA	Rhodobacterales bacterium Y4I	2	6	2	8	1	4	1	4	3	3	10	0	0	0	0	0	0	1	5	7	3	0	6	2	1	1	1	0	1	1	1	0
802	Bacteria	NA	Proteobacteria	Alphaproteobacteria	Rhodobacterales	Rhodobacteraceae	Ruegeria	Ruegeria sp. R11	0	3	0	5	2	1	2	3	0	1	1	0	0	0	0	0	0	0	1	6	0	0	0	0	0	0	1	1	1	1	1	0
803	Bacteria	NA	Proteobacteria	Gammaproteobacteria	Enterobacteriales	Enterobacteriaceae	Salmonella	Salmonella enterica	0	0	0	0	1	0	1	0	0	0	4	1	0	0	0	0	6	0	0	11	1	0	0	0	0	0	2	0	1	0	0	4
804	Bacteria	NA	Proteobacteria	Gammaproteobacteria	Enterobacteriales	Enterobacteriaceae	Salmonella	Salmonella enterica	0	0	0	0	0	0	4	1	0	0	7	9	1	2	0	0	2	2	0	314	11	5	4	4	1	0	1	0	0	0	0	0
805	Bacteria	NA	Cyanobacteria	NA	Chroococcales	NA	Cyanothece	Cyanothece sp. ATCC 51142	0	0	0	0	0	0	0	0	0	0	0	0	0	0	0	0	0	0	0	1	2	0	1	0	1	0	0	0	0	0	0	0
806	Bacteria	NA	Proteobacteria	Alphaproteobacteria	Rhizobiales	Methylobacteriaceae	Methylobacterium	Methylobacterium extorquens	7	4	4	2	0	0	9	2	0	2	6	1	0	0	1	0	10	4	0	0	2	1	0	0	0	0	2	4	4	0	4	0
807	Bacteria	NA	Proteobacteria	Gammaproteobacteria	Enterobacteriales	Enterobacteriaceae	Salmonella	Salmonella enterica	0	0	0	0	0	0	0	0	0	0	2	0	0	0	0	0	0	0	0	0	0	0	1	0	0	0	0	0	0	0	0	0
808	Eukaryota	NA	NA	Pelagophyceae	NA	NA	Aureococcus	Aureococcus anophagefferens	0	0	0	0	0	3	0	0	0	0	0	0	0	0	0	0	0	2	0	0	0	1	0	0	0	0	0	0	0	2	1	0
809	Bacteria	NA	Proteobacteria	Betaproteobacteria	Burkholderiales	Burkholderiaceae	Burkholderia	Burkholderia thailandensis	0	0	0	0	0	1	3	0	0	0	0	0	0	0	0	0	1	2	3	0	5	1	1	1	3	0	0	0	0	2	0	0
810	Bacteria	NA	Proteobacteria	Betaproteobacteria	Burkholderiales	Burkholderiaceae	Burkholderia	Burkholderia oklahomensis	0	0	1	0	0	1	1	1	0	0	0	2	1	0	0	1	7	3	4	0	11	2	2	0	1	0	3	0	2	4	0	1
811	Bacteria	NA	Proteobacteria	Betaproteobacteria	Burkholderiales	Burkholderiaceae	Burkholderia	Burkholderia thailandensis	1	1	2	3	1	0	1	4	0	1	4	2	0	3	0	0	3	4	6	3	2	1	1	0	3	0	6	3	2	4	1	0
812	Bacteria	NA	Proteobacteria	Betaproteobacteria	Burkholderiales	Burkholderiaceae	Burkholderia	Burkholderia ubonensis	0	0	0	1	0	0	2	0	0	0	3	0	0	0	0	0	3	1	4	8	3	5	2	0	5	1	1	1	1	2	1	0
813	Bacteria	NA	Proteobacteria	Alphaproteobacteria	Rhizobiales	Methylobacteriaceae	Methylobacterium	Methylobacterium populi	20	47	461	87	6	30	24	266	23	25	715	53	103	323	44	8	80	297	14	690	6	58	68	80	184	60	36	185	118	92	37	27
814	Bacteria	NA	Tenericutes	Mollicutes	Acholeplasmatales	Acholeplasmataceae	Acholeplasma	Acholeplasma laidlawii	0	0	0	0	1	1	4	1	0	1	0	2	0	0	0	1	0	1	0	1	9	3	2	0	1	0	0	0	3	2	2	1
815	Bacteria	NA	Firmicutes	Bacilli	Bacillales	Bacillaceae	Bacillus	Bacillus coahuilensis	0	1	0	4	0	1	0	5	0	0	0	6	0	0	0	0	1	4	5	0	2	4	1	0	0	5	4	0	0	2	6	0
816	Bacteria	NA	Firmicutes	Clostridia	Clostridiales	Clostridiaceae	Clostridium	Clostridium botulinum	0	0	0	0	0	0	0	0	2	0	0	0	0	0	0	0	0	1	1	0	0	3	6	0	0	0	0	0	0	0	18	0
817	Bacteria	NA	Proteobacteria	Deltaproteobacteria	Desulfuromonadales	Geobacteraceae	Geobacter	Geobacter sp. M21	2	0	0	1	0	2	5	0	1	0	1	3	1	0	2	0	11	5	31	1	26	10	19	0	3	0	3	0	0	21	2	0
818	Bacteria	NA	Proteobacteria	Gammaproteobacteria	Alteromonadales	Alteromonadaceae	Marinobacter	Marinobacter algicola	1	2	6	8	0	2	3	1	1	0	0	1	1	1	1	0	0	0	0	1	3	1	0	0	0	0	3	4	2	3	0	0
819	Bacteria	NA	Actinobacteria	Actinobacteria	Actinomycetales	Streptomycetaceae	Streptomyces	Streptomyces clavuligerus	1	7	2	17	1	19	110	18	21	1	4	35	0	2	0	0	19	18	26	12	17	50	40	1	43	5	59	0	22	25	16	1
820	Bacteria	NA	Candidatus Saccharibacteria	NA	NA	NA	NA	candidate division TM7 genomosp. GTL1	15	13	0	61	17	55	294	9	26	4	33	5	1	3	8	15	287	430	882	13	1538	420	25	3	133	2	1123	2	422	1367	160	27
821	Bacteria	NA	Actinobacteria	Actinobacteria	Actinomycetales	Microbacteriaceae	Clavibacter	Clavibacter michiganensis	1	30	0	59	14	131	145	29	35	3	3	44	4	7	0	2	16	46	71	7	39	45	54	7	72	3	27	3	7	20	15	1
822	Archaea	NA	Crenarchaeota	Thermoprotei	Thermoproteales	Thermoproteaceae	Pyrobaculum	Pyrobaculum neutrophilum	0	0	0	0	0	0	1	0	0	0	0	0	0	0	0	0	0	0	0	0	0	0	1	0	0	0	0	0	0	0	0	0
823	Archaea	NA	Euryarchaeota	Methanococci	Methanococcales	Methanococcaceae	Methanococcus	Methanococcus maripaludis	0	0	0	0	0	0	1	0	0	0	0	0	0	0	0	0	0	0	0	0	0	0	0	0	0	0	0	0	0	0	0	0
824	Bacteria	NA	Firmicutes	Bacilli	Bacillales	Bacillaceae	Lysinibacillus	Lysinibacillus sphaericus	0	1	0	4	1	3	17	17	0	2	1	51	0	2	2	0	16	24	25	9	58	18	27	8	10	1	41	3	22	10	24	1
825	Bacteria	NA	Firmicutes	Clostridia	Clostridiales	Clostridiaceae	Clostridium	Clostridium perfringens	0	0	0	0	0	0	0	0	0	0	0	0	0	0	0	0	0	6	1	0	1	0	0	0	0	0	0	0	1	0	0	0
826	Bacteria	NA	Firmicutes	Clostridia	Clostridiales	Clostridiaceae	Clostridium	Clostridium botulinum	0	0	0	0	0	0	0	0	0	0	0	0	0	0	0	0	0	0	0	0	2	0	0	1	0	0	0	0	0	0	0	0
827	Bacteria	NA	Firmicutes	Clostridia	Clostridiales	Clostridiaceae	Clostridium	Clostridium botulinum	0	0	0	0	0	0	0	0	0	0	0	0	0	0	0	0	0	0	1	0	0	0	0	0	0	0	0	0	0	0	0	0
828	Bacteria	NA	Firmicutes	Clostridia	Clostridiales	Clostridiaceae	Clostridium	Clostridium botulinum	7	8	2	1	2	4	5	0	0	1	0	1	3	0	0	5	10	16	11	0	18	14	25	0	1	2	22	1	21	24	11	4
829	Viruses	NA	NA	NA	NA	Retroviridae	Gammaretrovirus	Murine leukemia virus	0	0	0	0	0	0	0	0	0	0	0	0	0	0	0	0	0	0	0	0	0	0	0	0	0	0	0	0	0	0	0	1
830	Bacteria	NA	Elusimicrobia	Elusimicrobia	Elusimicrobiales	Elusimicrobiaceae	Elusimicrobium	Elusimicrobium minutum	0	0	0	0	0	2	0	0	0	0	0	0	0	0	0	0	0	0	7	0	14	4	0	0	1	0	10	0	6	18	1	1
831	Bacteria	NA	Spirochaetes	Spirochaetia	Spirochaetales	Spirochaetaceae	Borrelia	Borrelia valaisiana	0	0	0	0	0	0	0	0	0	0	0	0	0	0	0	0	0	0	0	0	1	0	0	0	0	0	0	0	0	0	0	0
832	Bacteria	NA	Actinobacteria	Actinobacteria	Actinomycetales	Pseudonocardiaceae	Actinosynnema	Actinosynnema mirum	9	17	3	13	7	15	183	28	26	3	8	26	0	3	1	1	9	46	62	7	36	99	99	11	69	6	6	1	16	17	32	1
833	Bacteria	NA	Actinobacteria	Actinobacteria	Actinomycetales	Dermabacteraceae	Brachybacterium	Brachybacterium faecium	6	74	6	61	17	222	879	80	256	2	12	68	9	22	5	1	145	274	229	127	150	427	273	16	349	22	92	5	28	48	109	4
834	Bacteria	NA	Actinobacteria	Actinobacteria	Actinomycetales	Cellulomonadaceae	Cellulomonas	Cellulomonas flavigena	6	194	1	49	13	172	2533	205	331	1	18	35	16	13	1	7	174	291	211	41	141	303	474	37	209	21	88	2	30	206	136	11
835	Bacteria	NA	Actinobacteria	Actinobacteria	Actinomycetales	Nocardiopsaceae	Nocardiopsis	Nocardiopsis dassonvillei	1	43	4	23	2	60	428	46	54	1	8	58	5	9	0	1	37	73	68	13	47	87	72	17	105	4	22	2	8	24	19	3
836	Bacteria	NA	Actinobacteria	Actinobacteria	Actinomycetales	Sanguibacteraceae	Sanguibacter	Sanguibacter keddieii	1	201	5	58	42	245	1801	275	280	0	22	92	7	31	2	7	173	202	280	53	267	344	466	38	431	70	86	0	47	129	93	7
837	Bacteria	NA	Actinobacteria	Actinobacteria	Actinomycetales	Glycomycetaceae	Stackebrandtia	Stackebrandtia nassauensis	0	8	0	8	3	18	139	12	22	1	3	32	0	2	1	1	32	51	42	9	32	65	27	2	44	6	4	0	16	13	11	3
838	Bacteria	NA	Actinobacteria	Actinobacteria	Actinomycetales	Promicromonosporaceae	Xylanimonas	Xylanimonas cellulosilytica	2	116	4	112	62	325	1182	103	183	3	24	136	4	29	3	11	102	455	363	77	378	506	253	20	439	54	91	5	26	85	82	18
839	Bacteria	NA	Proteobacteria	Deltaproteobacteria	Myxococcales	Myxococcaceae	Anaeromyxobacter	Anaeromyxobacter sp. K	2	2	0	0	0	6	29	3	1	0	0	7	0	0	0	0	1	10	12	2	10	13	10	2	8	1	2	0	7	5	0	0
840	Bacteria	NA	Candidatus Saccharibacteria	NA	NA	NA	NA	candidate division TM7 single-cell isolate TM7c	102	756	14	416	919	489	879	64	465	10	94	12	28	17	46	49	1581	1733	5311	129	12004	3042	295	133	920	20	5015	48	3195	8844	1173	244
841	Bacteria	NA	Proteobacteria	Deltaproteobacteria	Myxococcales	Polyangiaceae	Sorangium	Sorangium cellulosum	2	1	2	1	0	3	23	6	0	0	4	2	2	2	1	3	8	18	12	7	15	9	5	0	16	2	8	1	3	7	1	0
842	Bacteria	NA	Cyanobacteria	NA	Chroococcales	NA	Microcystis	Microcystis aeruginosa	0	0	0	0	0	0	0	2	0	0	0	1	0	1	0	0	0	1	4	1	2	1	0	0	0	0	0	0	1	0	1	0
843	Bacteria	NA	Firmicutes	Bacilli	Bacillales	Staphylococcaceae	Staphylococcus	Staphylococcus aureus	0	0	0	0	0	0	0	0	0	0	0	0	0	0	0	0	0	1	4	0	0	0	0	0	0	1	0	1	0	0	1	0
844	Bacteria	NA	Firmicutes	Negativicutes	Selenomonadales	Veillonellaceae	Veillonella	Veillonella sp. 6_1_27	396	2719	3829	16973	4294	74037	41761	47117	21973	792	1692	370967	155	389	867	656	19881	115783	53796	9787	62142	147286	80782	12635	51870	46483	115155	291	73554	57173	59837	3970
845	Bacteria	NA	Proteobacteria	Alphaproteobacteria	Caulobacterales	Caulobacteraceae	Phenylobacterium	Phenylobacterium zucineum	3	1	5	6	0	4	7	2	4	0	4	7	1	4	1	0	2	5	12	5	10	7	3	2	3	1	4	5	3	3	4	2
846	Eukaryota	Fungi	Ascomycota	Dothideomycetes	Dothideales	Dothideaceae	Dothidea	Dothidea insculpta	0	0	0	0	0	0	0	0	0	0	0	2	0	0	0	0	0	0	0	0	0	0	0	0	0	0	0	0	0	0	0	0
847	Bacteria	NA	Firmicutes	Bacilli	Bacillales	Staphylococcaceae	Staphylococcus	Staphylococcus aureus	0	0	2	0	0	7	1	96	0	0	0	14	0	1	0	88	0	0	0	0	0	11	2	1	92	159	0	146	0	0	150	0
848	Bacteria	NA	Firmicutes	Erysipelotrichia	Erysipelotrichales	Erysipelotrichaceae	Catenibacterium	Catenibacterium mitsuokai	155	6446	22	718	77	286	49	104	100	7	22	84	3	6	18	8	29	42	350	421	72	30	110	8	10	5391	139	12	31	39	23	4
849	Bacteria	NA	Firmicutes	Bacilli	Bacillales	Bacillaceae	Bacillus	Bacillus cereus	0	0	0	0	0	0	2	0	0	0	0	4	0	0	0	0	2	3	0	0	2	1	1	0	0	0	5	1	1	13	4	0
850	Bacteria	NA	Firmicutes	Clostridia	Clostridiales	Clostridiaceae	Clostridium	Clostridium perfringens	0	0	0	0	0	0	0	0	0	0	0	0	0	0	0	0	5	2	5	0	4	2	6	0	0	0	2	0	0	0	2	0
851	Bacteria	NA	Firmicutes	Clostridia	Clostridiales	Clostridiaceae	Clostridium	Clostridium perfringens	0	0	0	0	0	0	0	0	0	0	0	0	0	0	0	0	0	0	2	0	4	0	2	0	0	0	6	0	0	3	2	0
852	Bacteria	NA	Firmicutes	Clostridia	Clostridiales	Clostridiaceae	Clostridium	Clostridium perfringens	0	0	0	0	0	0	0	0	0	0	0	1	0	0	0	0	2	0	2	0	0	0	0	0	0	0	0	0	0	0	1	0
853	Bacteria	NA	Bacteroidetes	NA	NA	NA	Candidatus Amoebophilus	Candidatus Amoebophilus asiaticus	1	0	0	0	0	0	0	1	0	0	0	0	0	0	0	0	1	1	7	0	8	1	0	0	0	0	0	0	0	0	0	0
854	Bacteria	NA	Verrucomicrobia	Opitutae	NA	Opitutaceae	Opitutus	Opitutus terrae	1	1	1	1	2	2	5	1	1	0	0	3	1	0	0	0	2	10	8	0	8	5	5	0	3	0	7	0	3	5	1	0
855	Bacteria	NA	Proteobacteria	Alphaproteobacteria	Sphingomonadales	Sphingomonadaceae	Sphingobium	Sphingobium japonicum	10	21	87	23	6	11	77	758	6	10	207	34	11	95	13	5	27	87	14	205	1	15	19	18	54	26	11	46	20	29	23	33
856	Bacteria	NA	Actinobacteria	Actinobacteria	Actinomycetales	Micrococcaceae	Arthrobacter	Arthrobacter chlorophenolicus	0	35	9	23	9	27	170	51	25	0	8	217	2	17	0	2	44	48	62	32	65	209	147	12	148	16	13	7	19	40	12	2
857	Archaea	NA	Crenarchaeota	Thermoprotei	Desulfurococcales	Desulfurococcaceae	Ignicoccus	Ignicoccus hospitalis	0	0	0	0	0	0	0	0	0	0	0	0	0	0	0	0	0	0	1	0	0	0	0	0	0	0	0	0	0	0	0	0
858	Viruses	NA	NA	NA	Caudovirales	Myoviridae	T4likevirus	Enterobacteria phage RB32	0	0	1	0	0	0	0	0	0	0	0	0	0	0	0	0	0	0	0	0	0	0	0	0	0	0	0	0	0	0	0	0
859	Bacteria	NA	Proteobacteria	Gammaproteobacteria	Enterobacteriales	Enterobacteriaceae	Salmonella	Salmonella enterica	1	10	0	4	1	2	0	2	0	0	179	0	0	0	2	0	3	2	0	14	0	0	0	17	0	33	23	1	9	1	0	0
860	Bacteria	NA	Proteobacteria	Gammaproteobacteria	Enterobacteriales	Enterobacteriaceae	Salmonella	Salmonella enterica	0	0	0	0	0	0	1	0	0	0	11	0	0	0	0	2	0	0	0	15	1	0	1	5	0	2	0	1	0	0	0	0
861	Bacteria	NA	Spirochaetes	Spirochaetia	Spirochaetales	Spirochaetaceae	Treponema	Treponema pallidum	0	0	0	0	3	0	3	0	1	1	0	0	1	0	0	1	0	0	0	0	1	0	0	0	0	0	0	0	0	1	0	2
862	Bacteria	NA	Proteobacteria	Gammaproteobacteria	Alteromonadales	Alteromonadaceae	Glaciecola	Glaciecola sp. HTCC2999	0	0	0	2	0	0	0	0	0	0	0	0	0	0	0	0	0	0	0	0	0	0	0	0	0	0	0	0	0	0	0	0
863	Bacteria	NA	Proteobacteria	Deltaproteobacteria	Myxococcales	Myxococcaceae	Anaeromyxobacter	Anaeromyxobacter dehalogenans	0	0	1	2	0	0	0	1	1	0	0	0	1	3	0	0	0	0	1	1	1	2	1	0	1	0	6	1	0	2	4	0
864	Bacteria	NA	Actinobacteria	Actinobacteria	Actinomycetales	Streptomycetaceae	Streptomyces	Streptomyces griseus	0	28	0	9	3	31	499	37	18	1	3	21	1	4	0	1	18	96	64	13	19	84	366	3	55	10	19	1	9	76	24	16
865	Archaea	NA	Euryarchaeota	Methanococci	Methanococcales	Methanococcaceae	Methanococcus	Methanococcus voltae	0	0	0	0	0	0	0	0	0	0	0	0	0	0	0	0	0	1	1	0	1	0	0	1	0	0	0	0	1	1	0	0
866	Archaea	NA	Euryarchaeota	Methanomicrobia	Methanomicrobiales	Methanoregulaceae	Methanoregula	Methanoregula boonei	0	0	0	0	0	0	0	0	0	0	0	0	0	0	0	0	1	0	0	0	2	0	1	0	1	0	0	0	0	2	0	0
867	Bacteria	NA	Bacteroidetes	Bacteroidia	Bacteroidales	Bacteroidaceae	Bacteroides	Bacteroides sp. 3_1_23	0	2	1	3	3	38	3	7	13	0	3	7	3	0	4	13	21	67	137	22	171	17	49	2	2	12	31	1	23	26	27	7
868	Bacteria	NA	Bacteroidetes	Bacteroidia	Bacteroidales	Bacteroidaceae	Bacteroides	Bacteroides sp. 3_1_33FAA	4	43	4	208	53	92	150	3879	129	8	123	120	17	22	7	67	462	412	3298	71	3031	3700	2764	242	76	456	1103	106	332	927	879	184
869	Bacteria	NA	Bacteroidetes	Bacteroidia	Bacteroidales	Bacteroidaceae	Bacteroides	Bacteroides sp. 9_1_42FAA	1	2	1	1	9	1	5	6	3	1	0	6	1	3	0	0	22	23	111	1	51	20	30	2	4	32	40	2	78	90	20	5
870	Bacteria	NA	Proteobacteria	Deltaproteobacteria	Desulfovibrionales	Desulfovibrionaceae	Desulfovibrio	Desulfovibrio sp. 3_1_syn3	4	1	0	0	11	0	24	0	11	0	1	2	0	1	0	0	6	4	8	0	5	0	0	0	0	0	0	0	1	0	0	0
871	Bacteria	NA	Firmicutes	Negativicutes	Selenomonadales	Veillonellaceae	Veillonella	Veillonella sp. 3_1_44	469	3424	3197	7489	8618	84939	112004	107741	31687	822	2604	162674	410	1234	434	348	45114	121221	135967	9618	78234	267484	247155	33456	86281	53447	86282	554	73112	56698	126492	3414
872	Bacteria	NA	Firmicutes	Clostridia	Clostridiales	NA	NA	Clostridiales bacterium 1_7_47FAA	2	13	3	13	12	6	10	39	14	1	10	79	2	6	17	7	79	143	332	12	196	1091	635	9	36	15	61	1	718	321	77	74
873	Bacteria	NA	Bacteroidetes	Bacteroidia	Bacteroidales	Bacteroidaceae	Bacteroides	Bacteroides fragilis	2	0	0	2	2	5	15	57	2	1	2	29	1	3	5	4	9	54	103	0	124	519	56	3	1	16	36	2	606	41	35	5
874	Bacteria	NA	Firmicutes	Clostridia	Natranaerobiales	Natranaerobiaceae	Natranaerobius	Natranaerobius thermophilus	0	0	0	0	0	0	1	1	0	0	0	1	0	0	0	0	1	1	14	2	0	6	1	0	1	0	0	0	1	3	1	1
875	Bacteria	NA	Firmicutes	Bacilli	Bacillales	Staphylococcaceae	Macrococcus	Macrococcus caseolyticus	0	1	1	0	3	6	24	62	7	8	5	114	0	0	6	2	26	48	28	12	114	61	43	9	28	0	101	1	67	13	32	1
876	Bacteria	NA	Proteobacteria	Gammaproteobacteria	Alteromonadales	Shewanellaceae	Shewanella	Shewanella halifaxensis	0	0	2	0	0	0	0	1	0	0	0	6	0	0	0	0	9	15	8	1	2	4	1	0	1	0	25	1	33	4	2	1
877	Viruses	NA	NA	NA	Caudovirales	Siphoviridae	NA	Streptococcus phage 858	0	1	0	13	0	1	17	1	21	1	0	0	0	0	1	0	0	541	0	2	25	1	1	34	9	1	0	4	0	0	5	0
878	Viruses	NA	NA	NA	NA	Baculoviridae	Alphabaculovirus	Autographa californica multiple nucleopolyhedrovirus	1	3	0	0	0	0	0	0	0	0	0	0	0	1	0	0	0	0	0	4	0	0	0	0	0	0	0	2	1	0	0	0
879	Bacteria	NA	Proteobacteria	Alphaproteobacteria	Rhizobiales	Methylobacteriaceae	Methylobacterium	Methylobacterium nodulans	1	1	6	8	0	4	9	3	3	0	11	5	2	5	0	3	3	8	20	9	13	1	8	1	8	0	24	1	5	8	3	0
880	Eukaryota	NA	NA	Cryptophyta	Cryptomonadales	Hemiselmidaceae	Hemiselmis	Hemiselmis andersenii	476	284	74	366	328	238	134	238	302	136	82	100	252	184	138	202	40	8	68	106	78	22	58	196	40	104	86	102	82	114	114	134
881	Bacteria	NA	Actinobacteria	Actinobacteria	Actinomycetales	Micrococcaceae	Micrococcus	Micrococcus luteus	53	396	34	245	95	645	2434	464	422	36	222	538	20	81	16	19	272	445	260	291	295	582	647	106	557	146	162	49	84	227	109	35
882	Bacteria	NA	Proteobacteria	Gammaproteobacteria	Enterobacteriales	Enterobacteriaceae	Salmonella	Salmonella enterica	0	0	0	0	0	0	0	0	0	0	3	0	0	0	0	0	0	0	0	4	0	0	0	0	0	0	1	1	0	0	0	0
883	Bacteria	NA	Proteobacteria	Gammaproteobacteria	Enterobacteriales	Enterobacteriaceae	Salmonella	Salmonella enterica	0	0	0	0	0	0	0	0	0	0	16	0	0	1	0	0	0	0	0	35	0	0	0	0	0	2	3	0	0	0	0	0
884	Bacteria	NA	Actinobacteria	Actinobacteria	Actinomycetales	Streptomycetaceae	Streptomyces	Streptomyces sp. Mg1	1	13	0	5	4	25	104	14	13	0	3	33	0	5	0	6	38	28	26	11	19	58	30	1	32	3	5	2	9	15	11	3
885	Bacteria	NA	Actinobacteria	Actinobacteria	Actinomycetales	Streptomycetaceae	Streptomyces	Streptomyces sp. SPB74	0	5	0	19	3	19	146	13	50	1	3	31	2	15	1	0	127	32	80	23	46	87	24	7	44	2	17	0	3	20	13	2
886	Bacteria	NA	Proteobacteria	Gammaproteobacteria	Enterobacteriales	Enterobacteriaceae	Erwinia	Erwinia tasmaniensis	0	0	0	1	0	1	3	2	0	0	17	1	0	0	0	4	5	1	0	33	5	0	0	2	1	7	4	1	10	0	2	2
887	Bacteria	NA	Proteobacteria	Alphaproteobacteria	Rhodobacterales	Rhodobacteraceae	NA	Rhodobacteraceae bacterium KLH11	1	1	0	3	0	0	4	0	0	1	6	0	0	0	0	2	0	1	3	3	4	0	1	0	1	0	0	0	3	1	0	0
888	Bacteria	NA	Firmicutes	Bacilli	Lactobacillales	Streptococcaceae	Streptococcus	Streptococcus gordonii	119	11297	6294	5166	53226	216937	592259	22678	26698	4063	8541	48006	1326	329	1275	1372	9581	48891	11736	7874	10746	23961	17568	4051	19959	2525	26172	435	20025	7499	12005	1129
889	Bacteria	NA	Actinobacteria	Actinobacteria	Actinomycetales	Pseudonocardiaceae	Thermobispora	Thermobispora bispora	0	15	1	1	2	11	152	13	8	1	2	22	0	7	0	0	3	24	29	3	10	16	10	6	40	6	13	0	2	10	4	0
890	Bacteria	NA	Actinobacteria	Actinobacteria	Coriobacteriales	Coriobacteriaceae	Cryptobacterium	Cryptobacterium curtum	715	166	1	602	13	179	6749	1852	190	13	2	296	48	115	0	12	13	150	9056	8	239	46	181	55	779	28	21	1	92	1694	228	19
891	Bacteria	NA	Synergistetes	Synergistia	Synergistales	Synergistaceae	Dethiosulfovibrio	Dethiosulfovibrio peptidovorans	0	0	0	0	1	5	0	1	0	0	0	0	0	0	0	0	0	1	1	3	2	0	0	3	0	6	1	0	1	1	2	1
892	Bacteria	NA	Actinobacteria	Actinobacteria	Solirubrobacterales	Conexibacteraceae	Conexibacter	Conexibacter woesei	3	5	2	4	1	7	32	6	7	1	2	3	1	1	1	0	10	11	10	3	12	6	1	3	10	2	8	2	7	17	4	0
893	Bacteria	NA	Bacteroidetes	Bacteroidia	Bacteroidales	Bacteroidaceae	Bacteroides	Bacteroides sp. 1_1_14	0	0	0	1	1	19	9	3	5	0	0	7	0	12	0	1	25	9	27	3	515	9	10	0	0	234	25	0	5	38	33	0
894	Bacteria	NA	Bacteroidetes	Bacteroidia	Bacteroidales	Bacteroidaceae	Bacteroides	Bacteroides sp. 2_1_16	0	1	2	1	4	0	6	2	2	0	0	1	2	0	0	2	2	4	20	0	8	212	3	0	1	7	11	1	0	34	4	1
895	Bacteria	NA	Bacteroidetes	Bacteroidia	Bacteroidales	Bacteroidaceae	Bacteroides	Bacteroides sp. 2_1_22	0	3	0	1	7	2	1	0	0	1	0	7	1	0	1	1	3	3	25	0	15	3	6	3	2	28	16	0	10	3	1	0
896	Bacteria	NA	Bacteroidetes	Bacteroidia	Bacteroidales	Bacteroidaceae	Bacteroides	Bacteroides sp. 2_1_33B	0	0	0	0	1	1	0	0	0	0	0	1	0	0	0	0	3	11	3	1	16	1	0	0	0	6	10	0	7	1	0	1
897	Bacteria	NA	Bacteroidetes	Bacteroidia	Bacteroidales	Bacteroidaceae	Bacteroides	Bacteroides sp. 2_2_4	2	10	0	3	157	34	11	2	4	15	0	8	1	0	0	1	4	3	94	20	32	13	4	8	7	4	19	0	2	38	12	4
898	Bacteria	NA	Bacteroidetes	Bacteroidia	Bacteroidales	Porphyromonadaceae	Parabacteroides	Parabacteroides sp. 20_3	2	10	0	15	80	13	46	2	11	10	5	18	23	3	0	49	70	144	541	18	747	227	253	10	10	32	3613	3	752	21	106	16
899	Bacteria	NA	Bacteroidetes	Bacteroidia	Bacteroidales	Bacteroidaceae	Bacteroides	Bacteroides sp. 3_1_19	3	1	0	1	0	0	0	3	1	1	3	0	0	0	0	0	0	5	155	0	12	0	8	2	0	159	27	0	1	2	8	11
900	Bacteria	NA	Proteobacteria	Gammaproteobacteria	Enterobacteriales	Enterobacteriaceae	Escherichia	Escherichia sp. 3_2_53FAA	0	1	0	0	2	0	3	0	0	0	1	1	0	0	1	0	0	0	0	3	0	0	0	0	0	0	0	0	0	0	0	1
901	Bacteria	NA	Fusobacteria	Fusobacteriia	Fusobacteriales	Fusobacteriaceae	Fusobacterium	Fusobacterium nucleatum	167	791	20	88	2920	2171	909	623	2053	826	383	178	1452	42	18	305	2949	11012	23323	3799	2509	3007	2319	2724	1410	11	5089	2246	12177	10642	4811	3822
902	Bacteria	NA	Proteobacteria	Gammaproteobacteria	Enterobacteriales	Enterobacteriaceae	Klebsiella	Klebsiella sp. 1_1_55	1	2	0	0	0	0	0	0	0	1	128	0	0	0	0	1	0	1	3	236	1	0	1	16	0	23	1	0	0	1	0	97
903	Bacteria	NA	Proteobacteria	Betaproteobacteria	Burkholderiales	NA	NA	Burkholderiales bacterium 1_1_47	0	0	0	0	0	0	1	0	1	0	0	2	1	0	0	0	1	0	2	0	2	2	1	0	0	1	3	0	1	0	1	0
904	Bacteria	NA	Fusobacteria	Fusobacteriia	Fusobacteriales	Fusobacteriaceae	Fusobacterium	Fusobacterium periodonticum	3	542	747	394	2366	921	240	110	1462	467	4	441	446	1086	579	4286	409114	463400	10974	645	136137	308521	65507	206	2067	30	440740	3784	367314	133326	51876	92731
905	Bacteria	NA	Firmicutes	Bacilli	Bacillales	Bacillaceae	Geobacillus	Geobacillus sp. WCH70	0	0	0	1	3	0	6	17	0	0	0	8	0	0	0	0	0	2	2	8	13	9	11	6	3	0	35	0	5	4	6	5
906	Bacteria	NA	Actinobacteria	Actinobacteria	Actinomycetales	Thermomonosporaceae	Thermomonospora	Thermomonospora curvata	0	41	3	4	13	58	417	58	60	1	12	45	1	3	0	0	6	29	30	19	21	48	41	1	75	5	9	2	9	14	20	3
907	Bacteria	NA	Actinobacteria	Actinobacteria	Actinomycetales	Beutenbergiaceae	Beutenbergia	Beutenbergia cavernae	0	47	3	23	20	125	564	101	96	3	16	43	6	12	0	7	35	88	94	22	88	110	182	30	107	17	30	2	12	85	37	0
908	Bacteria	NA	Bacteroidetes	Cytophagia	Cytophagales	Cytophagaceae	Dyadobacter	Dyadobacter fermentans	0	0	0	0	0	1	3	0	0	0	0	1	1	0	0	0	2	10	39	1	22	2	8	0	1	4	12	1	7	7	9	1
909	Bacteria	NA	Actinobacteria	Actinobacteria	Coriobacteriales	Coriobacteriaceae	Slackia	Slackia heliotrinireducens	15	1	0	3	3	26	27	10	3	0	0	4	1	1	0	2	3	7	38	2	48	12	21	9	11	3	8	0	11	18	18	2
910	Bacteria	NA	Actinobacteria	Actinobacteria	Actinomycetales	Jonesiaceae	Jonesia	Jonesia denitrificans	0	7	1	5	2	3	32	11	9	0	0	1	0	3	0	1	6	29	35	9	15	34	121	0	50	1	5	1	5	21	9	1
911	Bacteria	NA	Actinobacteria	Actinobacteria	Actinomycetales	Pseudonocardiaceae	Saccharomonospora	Saccharomonospora viridis	2	6	0	2	0	8	41	5	5	0	1	6	0	0	0	0	6	5	6	2	5	23	17	4	16	3	0	1	5	3	3	0
912	Bacteria	NA	Bacteroidetes	Bacteroidia	Bacteroidales	Bacteroidaceae	Bacteroides	Bacteroides intestinalis	4	4	1	4	12	3	9	7	3	0	0	43	0	2	2	7	29	171	305	61	254	84	68	0	16	10	76	6	90	254	62	22
913	Bacteria	NA	Proteobacteria	Gammaproteobacteria	Chromatiales	Chromatiaceae	Nitrosococcus	Nitrosococcus halophilus	0	0	0	0	0	1	0	0	0	0	0	1	0	0	0	0	0	5	1	0	1	0	0	0	0	0	1	0	0	2	1	1
914	Bacteria	NA	Actinobacteria	Actinobacteria	Bifidobacteriales	Bifidobacteriaceae	Bifidobacterium	Bifidobacterium dentium	0	2	0	2	0	14	198	39	280	62	8	138	23	8	0	0	3	34	44	10	8	19	7	25	0	1	3	0	4	0	16	0
915	Viruses	NA	NA	NA	Caudovirales	Siphoviridae	NA	Lactococcus phage 1706	0	0	0	0	0	0	0	0	0	0	0	0	0	0	0	0	0	0	0	0	0	0	0	0	0	0	0	0	0	2	0	0
916	Bacteria	NA	Firmicutes	Clostridia	Clostridiales	Peptococcaceae	Candidatus Desulforudis	Candidatus Desulforudis audaxviator	0	0	0	1	0	1	3	0	1	0	0	0	0	0	0	0	0	3	5	1	1	4	4	0	1	0	2	0	1	1	3	0
917	Archaea	NA	Euryarchaeota	Halobacteria	Halobacteriales	Halobacteriaceae	Halobacterium	Halobacterium salinarum	0	0	0	0	0	0	0	0	1	0	0	0	0	0	0	0	1	2	2	0	0	1	0	0	1	0	0	0	0	1	0	0
918	Bacteria	NA	Actinobacteria	Actinobacteria	Actinomycetales	Mycobacteriaceae	Mycobacterium	Mycobacterium tuberculosis	0	0	0	0	0	0	20	0	0	0	0	0	0	3	0	0	0	2	0	0	0	0	0	1	0	1	0	0	1	0	0	0
919	Eukaryota	NA	NA	NA	Peronosporales	NA	Phytophthora	Phytophthora infestans	0	0	0	0	0	0	0	0	0	0	0	0	0	0	0	0	0	0	0	0	0	0	0	0	1	0	0	0	0	0	0	0
920	Bacteria	NA	Firmicutes	Clostridia	Clostridiales	Lachnospiraceae	Marvinbryantia	Marvinbryantia formatexigens	1	3	0	8	1	7	8	17	5	0	2	136	0	10	0	3	84	769	489	10	125	158	163	19	23	3	61	0	60	116	34	6
921	Bacteria	NA	Actinobacteria	Actinobacteria	Actinomycetales	Dermacoccaceae	Kytococcus	Kytococcus sedentarius	1	191	6	45	26	158	872	93	105	3	58	49	6	12	5	5	52	245	85	92	115	114	97	38	405	95	25	3	38	40	42	2
922	Bacteria	NA	Actinobacteria	Actinobacteria	Actinomycetales	Nakamurellaceae	Nakamurella	Nakamurella multipartita	4	31	2	19	21	44	201	18	34	1	5	31	0	15	1	0	75	47	48	5	37	38	47	12	92	4	6	4	14	13	13	1
923	Bacteria	NA	Actinobacteria	Actinobacteria	Actinomycetales	Streptosporangiaceae	Streptosporangium	Streptosporangium roseum	6	28	1	15	10	41	478	30	51	2	11	17	1	9	0	3	29	35	41	9	39	48	67	6	45	9	29	2	13	21	28	1
924	Bacteria	NA	Actinobacteria	Actinobacteria	Actinomycetales	Catenulisporaceae	Catenulispora	Catenulispora acidiphila	1	46	0	15	12	58	413	62	83	0	8	122	1	10	0	2	57	51	104	13	48	113	83	14	108	5	18	1	9	61	20	1
925	Bacteria	NA	Chloroflexi	Thermomicrobia	Sphaerobacterales	Sphaerobacteraceae	Sphaerobacter	Sphaerobacter thermophilus	0	1	1	1	0	1	12	1	2	0	0	1	0	1	0	0	0	3	3	2	1	2	3	0	2	0	4	0	1	3	0	0
926	Bacteria	NA	Actinobacteria	Actinobacteria	Actinomycetales	Nocardioidaceae	Kribbella	Kribbella flavida	0	21	1	13	1	44	134	11	16	1	5	40	1	4	0	0	12	46	27	14	29	31	37	2	45	9	13	1	5	17	7	2
927	Bacteria	NA	Firmicutes	Negativicutes	Selenomonadales	Veillonellaceae	Veillonella	Veillonella parvula	1469	11098	14657	54564	24071	262995	280087	310270	76834	2597	5595	1094195	1849	5694	3636	3816	201945	589991	520518	40245	365544	984915	792095	104486	315863	225063	618877	2375	458243	297128	422940	21540
928	Bacteria	NA	Actinobacteria	Actinobacteria	Coriobacteriales	Coriobacteriaceae	Eggerthella	Eggerthella lenta	3	44	0	6	7	15	108	14	15	3	3	16	11	0	1	2	15	15	344	3	60	40	266	13	22	2	9	1	74	60	44	1
929	Bacteria	NA	Proteobacteria	Gammaproteobacteria	Pseudomonadales	Moraxellaceae	Acinetobacter	Acinetobacter baumannii	3	13	22	18	0	0	0	58	0	2	397	95	6	29	0	0	0	22	125	1043	27	0	8	33	4	119	82	0	113	5	21	31
930	Bacteria	NA	Chloroflexi	Chloroflexi	Chloroflexales	Chloroflexaceae	Chloroflexus	Chloroflexus sp. Y-400-fl	0	0	0	0	0	0	0	1	0	0	0	0	0	0	0	0	0	0	1	0	7	2	0	0	0	0	5	0	5	0	0	0
931	Bacteria	NA	Verrucomicrobia	NA	Methylacidiphilales	Methylacidiphilaceae	Methylacidiphilum	Methylacidiphilum infernorum	0	0	0	0	0	0	0	0	0	0	0	0	0	0	0	0	0	0	0	0	2	2	0	0	0	0	0	0	0	0	0	1
932	Bacteria	NA	Firmicutes	Bacilli	Bacillales	Paenibacillaceae	Paenibacillus	Paenibacillus sp. Y412MC10	1	2	0	5	0	2	2	0	0	1	2	0	1	0	0	2	2	20	9	0	13	9	11	1	6	1	5	1	3	9	7	1
933	Bacteria	NA	Proteobacteria	Betaproteobacteria	Burkholderiales	Burkholderiaceae	Burkholderia	Burkholderia lata	3	1	1	1	1	1	6	2	1	1	8	2	0	3	0	0	6	9	2	5	2	4	1	0	3	1	4	1	1	3	2	0
934	Bacteria	NA	Thermotogae	Thermotogae	Thermotogales	Thermotogaceae	Thermosipho	Thermosipho africanus	0	0	0	0	0	0	0	0	0	0	0	0	0	0	0	0	1	1	1	0	0	0	0	1	0	0	0	0	0	0	0	0
935	Eukaryota	NA	NA	NA	NA	Histionidae	Reclinomonas	Reclinomonas americana	0	0	0	0	0	0	0	0	0	0	0	0	0	0	0	0	0	0	0	0	1	0	0	0	0	0	0	0	0	0	0	0
936	Eukaryota	NA	Apicomplexa	Aconoidasida	NA	Babesiidae	Babesia	Babesia bovis	16	10	5	16	10	4	12	8	3	5	3	12	5	18	15	3	1	0	0	6	2	3	0	7	4	2	3	3	1	4	1	0
937	Bacteria	NA	Chloroflexi	Ktedonobacteria	Ktedonobacterales	Ktedonobacteraceae	Ktedonobacter	Ktedonobacter racemifer	0	0	0	1	0	0	2	1	0	0	0	0	0	0	0	1	2	2	15	0	41	7	0	0	5	1	17	0	1	24	3	0
938	Archaea	NA	Euryarchaeota	Halobacteria	Halobacteriales	Halobacteriaceae	Halomicrobium	Halomicrobium mukohataei	0	0	0	0	0	0	3	0	0	0	0	2	0	0	0	0	0	4	2	3	2	0	1	0	0	0	4	0	8	1	0	0
939	Bacteria	NA	Proteobacteria	Deltaproteobacteria	Desulfovibrionales	Desulfohalobiaceae	Desulfohalobium	Desulfohalobium retbaense	0	0	0	0	0	0	1	0	0	0	0	0	0	0	0	0	0	0	4	0	2	0	1	0	0	0	0	0	0	1	0	0
940	Bacteria	NA	Firmicutes	Clostridia	Clostridiales	Peptococcaceae	Desulfotomaculum	Desulfotomaculum acetoxidans	0	0	0	0	0	1	1	1	0	0	0	7	0	0	0	0	3	4	15	1	9	3	3	1	0	0	4	0	0	3	3	2
941	Bacteria	NA	Bacteroidetes	Sphingobacteriia	Sphingobacteriales	Sphingobacteriaceae	Pedobacter	Pedobacter heparinus	0	0	1	0	2	0	1	1	1	0	0	1	1	0	0	0	8	17	5	0	1	1	0	0	0	0	1	0	1	4	0	8
942	Bacteria	NA	Bacteroidetes	Sphingobacteriia	Sphingobacteriales	NA	Chitinophaga	Chitinophaga pinensis	0	0	1	0	0	0	0	1	1	0	0	1	0	2	0	1	2	7	6	2	11	6	3	0	0	0	15	0	2	0	2	1
943	Bacteria	NA	Firmicutes	Bacilli	Lactobacillales	Streptococcaceae	Streptococcus	Streptococcus dysgalactiae	4	9	12	33	16	31	108	184	0	194	12	753	0	2	30	146	233	452	211	93	506	371	260	38	235	89	596	2	452	134	176	47
944	Bacteria	NA	Actinobacteria	Actinobacteria	Actinomycetales	Mycobacteriaceae	Mycobacterium	Mycobacterium intracellulare	0	2	1	1	2	8	40	5	8	0	1	3	1	0	1	2	4	19	12	1	5	40	21	2	13	1	5	1	5	7	5	2
945	Bacteria	NA	Bacteroidetes	Flavobacteriia	NA	NA	NA	Flavobacteria bacterium MS024-2A	0	0	0	0	2	2	1	0	0	0	0	0	1	1	0	0	4	0	0	1	4	2	1	0	0	3	5	4	1	1	0	0
946	Bacteria	NA	Bacteroidetes	Flavobacteriia	NA	NA	NA	Flavobacteria bacterium MS024-3C	0	0	0	0	0	0	0	0	0	0	0	3	0	0	0	0	0	2	3	0	2	0	1	0	0	0	6	0	6	0	0	0
947	Bacteria	NA	Firmicutes	Clostridia	Clostridiales	Clostridiaceae	Clostridium	Clostridium perfringens	0	0	0	1	0	0	0	2	0	0	0	0	0	0	0	1	1	1	3	0	7	0	0	0	0	0	4	0	0	6	0	0
948	Bacteria	NA	Proteobacteria	Alphaproteobacteria	NA	NA	Candidatus Puniceispirillum	Candidatus Puniceispirillum marinum	0	0	0	0	0	0	2	0	0	0	1	0	0	0	0	0	2	1	5	0	6	1	0	0	0	0	3	0	0	2	0	0
949	Bacteria	NA	Firmicutes	Bacilli	Lactobacillales	Lactobacillaceae	Lactobacillus	Lactobacillus crispatus	360	0	0	0	0	0	4	8	1	0	1	14	0	0	0	0	0	0	0	0	0	0	0	19	0	0	3	0	0	2	0	0
950	Bacteria	NA	Firmicutes	Bacilli	Bacillales	Bacillaceae	Anoxybacillus	Anoxybacillus flavithermus	14	3	7	5	0	4	48	26	0	0	1	37	0	2	3	0	17	34	25	10	36	21	11	6	5	0	102	0	30	11	15	1
951	Bacteria	NA	Proteobacteria	Alphaproteobacteria	Rhizobiales	Rhizobiaceae	Rhizobium	Rhizobium etli	2	1	5	3	0	2	12	1	1	0	8	1	0	5	1	0	2	9	12	8	11	1	2	1	3	1	16	3	3	3	2	2
952	Eukaryota	Fungi	Ascomycota	Saccharomycetes	Saccharomycetales	Debaryomycetaceae	Millerozyma	Millerozyma farinosa	0	0	0	0	0	0	0	0	0	1	0	0	0	0	0	0	0	1	0	0	0	0	0	0	0	0	0	0	0	0	0	0
953	Bacteria	NA	Firmicutes	Clostridia	Clostridiales	Clostridiaceae	Clostridium	Clostridium thermocellum	0	0	0	2	3	2	4	3	1	0	0	17	0	1	0	0	10	6	45	0	46	10	16	6	4	4	7	0	2	20	12	0
954	Viruses	NA	NA	NA	Caudovirales	Siphoviridae	NA	Lactococcus phage 936 sensu lato	0	0	0	1	0	0	0	0	0	0	1	0	0	0	0	0	0	1	1	1	0	1	0	0	0	0	0	0	0	0	0	0
955	Bacteria	NA	Firmicutes	Bacilli	Bacillales	Bacillaceae	Geobacillus	Geobacillus sp. G11MC16	68	9	129	23	13	30	655	20	7	7	77	15	4	9	7	9	1	99	23	308	8	231	64	11	62	5	188	6	4	161	5	6
956	Bacteria	NA	Proteobacteria	Gammaproteobacteria	Enterobacteriales	Enterobacteriaceae	Salmonella	Salmonella enterica	1	6	3	1	0	0	1	0	0	0	4	0	2	1	4	3	1	3	1	7	0	0	0	1	3	1	7	3	1	0	0	0
957	Viruses	NA	NA	NA	Caudovirales	Siphoviridae	NA	Lactobacillus phage Lrm1	3	0	0	0	0	0	0	0	0	0	0	0	0	0	0	0	0	0	0	0	0	0	0	0	1	0	0	0	0	0	0	0
958	Bacteria	NA	Verrucomicrobia	Spartobacteria	NA	NA	Chthoniobacter	Chthoniobacter flavus	0	0	1	0	1	0	4	1	0	0	0	1	0	0	0	0	1	7	1	5	1	0	0	0	0	2	1	0	2	3	0	0
959	Bacteria	NA	Proteobacteria	Gammaproteobacteria	Pseudomonadales	Pseudomonadaceae	Cellvibrio	Cellvibrio japonicus	0	0	1	0	0	0	0	4	0	0	2	28	0	0	0	0	9	6	5	1	20	12	6	1	1	0	7	0	3	2	1	1
960	Bacteria	NA	Firmicutes	Clostridia	Clostridiales	Clostridiaceae	Clostridium	Clostridium botulinum	0	1	1	0	0	9	0	4	0	1	1	6	0	0	1	0	4	23	1	2	50	3	7	4	2	8	9	2	14	3	0	6
961	Bacteria	NA	Firmicutes	Bacilli	Lactobacillales	Lactobacillaceae	Lactobacillus	Lactobacillus casei	11	0	69	1	0	18	0	0	0	1	0	6	0	0	0	0	1	2	81	0	17	0	0	0	2	0	0	1	0	14	0	0
962	Bacteria	NA	Proteobacteria	Gammaproteobacteria	Enterobacteriales	Enterobacteriaceae	Edwardsiella	Edwardsiella tarda	0	0	0	0	0	0	0	0	0	0	0	0	0	0	0	1	0	0	15	0	0	0	0	0	2	0	2	3	0	2	0	2
963	Bacteria	NA	Spirochaetes	Spirochaetia	Spirochaetales	Spirochaetaceae	Borrelia	Borrelia burgdorferi	0	0	0	0	0	0	0	0	0	0	0	0	0	0	0	0	0	0	0	0	0	0	0	1	0	0	0	0	0	0	0	0
964	Bacteria	NA	Firmicutes	Clostridia	Clostridiales	Heliobacteriaceae	Heliobacterium	Heliobacterium modesticaldum	4	0	0	0	0	1	6	0	1	0	2	0	0	1	0	1	1	7	31	2	31	12	50	1	2	0	10	0	2	27	8	0
965	Bacteria	NA	Deinococcus-Thermus	Deinococci	Thermales	Thermaceae	Thermus	Thermus aquaticus	0	0	0	1	1	0	5	0	0	0	0	1	0	0	0	0	0	0	3	4	4	2	2	0	1	0	1	0	0	2	1	1
966	Bacteria	NA	Firmicutes	Clostridia	Clostridiales	Peptostreptococcaceae	Peptoclostridium	Peptoclostridium difficile	0	0	0	0	0	0	0	0	0	0	0	0	0	0	0	0	3	2	0	1	0	0	0	0	0	1	1	0	1	0	1	1
967	Bacteria	NA	Proteobacteria	Gammaproteobacteria	Enterobacteriales	Enterobacteriaceae	Edwardsiella	Edwardsiella tarda	0	0	0	0	0	1	1	0	1	0	7	2	0	0	0	0	2	0	1	14	8	2	2	2	0	2	1	1	3	1	0	0
968	Bacteria	NA	Proteobacteria	Gammaproteobacteria	Enterobacteriales	Enterobacteriaceae	Citrobacter	Citrobacter youngae	3	0	14	8	2	0	2	0	0	0	192	3	0	2	0	0	7	10	15	281	4	4	14	24	1	26	174	8	13	7	3	4
969	Eukaryota	Fungi	Ascomycota	Saccharomycetes	Saccharomycetales	Saccharomycetaceae	Dekkera	Dekkera bruxellensis	0	0	0	0	0	0	0	0	0	0	0	0	0	0	0	0	0	0	0	1	0	0	0	0	0	0	0	0	0	0	0	0
970	Bacteria	NA	Proteobacteria	Alphaproteobacteria	Rhodobacterales	Rhodobacteraceae	Citreicella	Citreicella sp. SE45	2	14	5	22	2	3	17	3	5	7	22	3	1	6	0	4	7	23	11	20	16	5	1	0	5	7	16	0	5	0	2	1
971	Bacteria	NA	Bacteroidetes	Cytophagia	Cytophagales	Cytophagaceae	Spirosoma	Spirosoma linguale	1	1	0	0	0	0	1	3	0	0	1	10	0	1	0	0	3	11	26	5	31	10	12	0	4	2	14	0	1	16	2	0
972	Bacteria	NA	Actinobacteria	Actinobacteria	Actinomycetales	Corynebacteriaceae	Corynebacterium	Corynebacterium urealyticum	5	144	6	826	9	104	630	60	93	26	30	648	3	12	47	5	51	3666	43	43	22	2539	3893	30	339	193	134	11	34	2094	5	8
973	Bacteria	NA	Deinococcus-Thermus	Deinococci	Thermales	Thermaceae	Meiothermus	Meiothermus ruber	1	2	2	2	1	6	19	1	1	0	5	2	0	0	0	1	2	3	8	1	1	2	3	2	3	1	2	1	1	1	0	0
974	Bacteria	NA	Proteobacteria	Alphaproteobacteria	Rhizobiales	Bradyrhizobiaceae	Oligotropha	Oligotropha carboxidovorans	0	2	1	5	0	3	1	0	0	0	6	0	4	1	2	0	0	3	9	5	4	7	8	1	2	0	13	4	5	7	1	0
975	Viruses	NA	NA	NA	Caudovirales	Siphoviridae	Lambdalikevirus	Pseudomonas phage MP38	0	0	0	0	0	0	0	0	0	0	0	0	0	0	0	0	0	0	0	0	0	0	0	1	0	0	0	0	0	0	0	0
976	Eukaryota	Fungi	Ascomycota	Eurotiomycetes	Eurotiales	Aspergillaceae	Aspergillus	Aspergillus oryzae	0	0	0	0	0	0	0	0	0	0	2	0	0	0	0	0	0	0	0	0	0	0	0	0	0	0	2	0	0	0	0	0
977	Eukaryota	Fungi	Ascomycota	Eurotiomycetes	Eurotiales	Aspergillaceae	Aspergillus	Aspergillus tubingensis	0	0	0	0	1	0	0	0	0	0	0	0	0	0	0	0	0	0	0	0	0	0	0	0	0	0	0	0	0	0	0	0
978	Bacteria	NA	Firmicutes	Clostridia	Clostridiales	Clostridiaceae	Clostridium	Clostridium botulinum	0	1	0	0	0	1	0	1	0	0	1	8	0	0	0	0	18	16	4	1	44	1	0	0	5	4	4	0	19	0	6	0
979	Bacteria	NA	Firmicutes	Clostridia	Clostridiales	Clostridiaceae	Clostridium	Clostridium botulinum	1	0	0	0	0	0	3	0	1	0	0	2	0	0	0	0	0	0	1	2	1	17	14	0	0	0	26	0	1	0	0	0
980	Bacteria	NA	Proteobacteria	Gammaproteobacteria	Pseudomonadales	Moraxellaceae	Acinetobacter	Acinetobacter baumannii	0	1	0	0	0	1	9	6	0	1	9	13	0	2	0	0	0	2	9	62	3	6	1	1	0	4	1	4	1	4	0	0
981	Bacteria	NA	Proteobacteria	Gammaproteobacteria	Pseudomonadales	Moraxellaceae	Acinetobacter	Acinetobacter baumannii	1	0	0	1	6	0	0	2	6	1	30	2	7	5	2	7	81	2	0	71	0	1	1	3	1	26	2	73	0	5	1	6
982	Bacteria	NA	Proteobacteria	Alphaproteobacteria	Caulobacterales	Caulobacteraceae	Caulobacter	Caulobacter segnis	0	2	5	9	0	1	16	7	6	1	33	1	0	13	0	1	5	5	3	13	1	41	6	3	4	2	5	5	6	12	4	0
983	Bacteria	NA	Firmicutes	Bacilli	Lactobacillales	Streptococcaceae	Streptococcus	Streptococcus mutans	42	45	68	213	322	470	8963	2517	195	270	58	4067	55	21	97	78	267	1203	436	237	923	1012	522	345	536	392	1461	22	860	274	516	35
984	Viruses	NA	NA	NA	NA	Microviridae	Microvirus	Enterobacteria phage ID2 Moscow/ID/2001	0	0	0	0	0	0	0	0	0	0	0	0	0	0	0	0	0	0	0	0	0	0	0	0	0	0	1	0	0	0	0	0
985	Bacteria	NA	Bacteroidetes	Bacteroidia	Bacteroidales	NA	Candidatus Azobacteroides	Candidatus Azobacteroides pseudotrichonymphae	0	0	1	0	1	1	4	0	0	0	0	1	1	0	0	2	6	26	14	0	11	2	3	0	0	3	30	0	10	10	5	3
986	Bacteria	NA	Tenericutes	Mollicutes	Mycoplasmatales	Mycoplasmataceae	Mycoplasma	Mycoplasma crocodyli	0	0	0	1	2	0	0	0	0	0	0	0	0	0	0	0	0	0	0	1	1	0	1	1	0	0	0	0	1	1	0	0
987	Viruses	NA	NA	NA	NA	Lipothrixviridae	Betalipothrixvirus	Acidianus filamentous virus 9	0	0	0	0	0	0	0	0	0	0	0	0	1	0	0	0	0	0	0	0	0	0	0	0	0	0	0	0	0	0	0	0
988	Bacteria	NA	Cyanobacteria	NA	Oscillatoriales	NA	Arthrospira	Arthrospira maxima	0	1	0	0	0	0	0	0	0	0	9	1	0	0	1	0	0	0	0	0	0	0	0	1	0	0	5	0	1	0	0	0
989	Eukaryota	Viridiplantae	Chlorophyta	NA	NA	NA	Oltmannsiellopsis	Oltmannsiellopsis viridis	0	0	1	0	0	0	2	0	0	0	0	2	0	0	0	1	1	2	0	0	2	0	1	0	0	0	2	0	2	0	0	0
990	Eukaryota	Viridiplantae	Chlorophyta	Chlorophyceae	Chaetopeltidales	Chaetopeltidaceae	Floydiella	Floydiella terrestris	0	0	0	0	0	0	0	0	0	0	0	0	0	0	0	0	0	0	0	0	0	0	0	0	0	0	1	0	0	0	0	0
991	Eukaryota	Fungi	Ascomycota	Sordariomycetes	Hypocreales	Hypocreaceae	Trichoderma	Trichoderma reesei	0	0	0	0	0	0	0	0	0	0	0	0	0	0	0	0	0	1	0	0	0	0	0	0	0	0	0	0	0	0	0	0
992	Bacteria	NA	Proteobacteria	Gammaproteobacteria	Enterobacteriales	Enterobacteriaceae	Candidatus Riesia	Candidatus Riesia pediculicola	0	0	0	0	0	0	0	0	0	0	0	0	0	0	0	0	0	0	0	0	1	1	0	0	0	0	3	0	1	0	0	0
993	Bacteria	NA	Firmicutes	Clostridia	Clostridiales	Eubacteriaceae	Eubacterium	Eubacterium rectale	2	12	15	55	46	50	235	229	98	13	12	1277	5	2	22	37	1460	1726	3456	95	2174	4963	2874	72	425	151	1590	4	1291	1957	589	88
994	Bacteria	NA	Firmicutes	Clostridia	Clostridiales	Eubacteriaceae	Eubacterium	Eubacterium eligens	1	3	1	5	13	11	16	37	9	0	1	1028	7	23	1	9	501	673	311	27	644	353	1090	35	27	15	328	4	454	312	91	134
995	Bacteria	NA	Firmicutes	Clostridia	Clostridiales	Clostridiaceae	Clostridium	Clostridium botulinum	0	0	0	0	2	0	1	1	0	0	0	1	0	0	0	0	3	2	0	0	0	1	5	0	0	0	1	1	2	4	0	0
996	Bacteria	NA	Dictyoglomi	Dictyoglomia	Dictyoglomales	Dictyoglomaceae	Dictyoglomus	Dictyoglomus turgidum	0	0	1	0	0	0	0	0	0	1	0	1	0	0	0	0	0	0	0	0	1	1	0	0	1	0	0	0	0	0	0	0
997	Bacteria	NA	Proteobacteria	Betaproteobacteria	Burkholderiales	Burkholderiaceae	Burkholderia	Burkholderia sp. H160	1	0	34	319	0	2	5	1	1	0	2	3	0	310	0	0	137	64	8	321	3	47	7	600	1	0	6	1	239	4	141	97
998	Bacteria	NA	Chlorobi	Chlorobia	Chlorobiales	Chlorobiaceae	Chlorobaculum	Chlorobaculum parvum	1	0	0	1	0	1	4	0	1	0	1	1	0	0	0	0	0	2	5	1	9	1	3	0	4	0	5	0	2	4	3	0
999	Bacteria	NA	Chlorobi	Chlorobia	Chlorobiales	Chlorobiaceae	Chloroherpeton	Chloroherpeton thalassium	0	0	0	0	0	2	0	2	0	0	0	0	0	0	0	0	1	1	2	0	1	0	0	0	0	0	1	1	0	2	0	0
1000	Bacteria	NA	Actinobacteria	Actinobacteria	Bifidobacteriales	Bifidobacteriaceae	Bifidobacterium	Bifidobacterium breve	7	4	4	18	1	21	81	203	29	4	2	18	0	3	1	1	4	64	67	22	1394	48	98	24	109	8	18	1	4	35	24	0
1001	Bacteria	NA	Bacteroidetes	NA	Bacteroidetes Order II. Incertae sedis	Rhodothermaceae	Rhodothermus	Rhodothermus marinus	0	1	2	1	1	1	5	5	0	0	1	2	2	0	0	1	1	9	7	1	9	4	8	0	2	1	7	2	5	7	6	1
1002	Bacteria	NA	Fusobacteria	Fusobacteriia	Fusobacteriales	Leptotrichiaceae	Streptobacillus	Streptobacillus moniliformis	3	1	5	13	103	38	23	20	16	10	2	311	10	1	1	29	196	136	790	34	723	339	204	20	27	94	359	87	185	362	226	147
1003	Archaea	NA	Euryarchaeota	Halobacteria	Halobacteriales	Halobacteriaceae	Halorhabdus	Halorhabdus utahensis	0	0	0	0	0	0	4	0	0	0	0	0	0	0	0	0	0	0	0	0	2	2	1	0	0	0	0	0	0	0	0	0
1004	Bacteria	NA	Tenericutes	Mollicutes	Mycoplasmatales	Mycoplasmataceae	Ureaplasma	Ureaplasma parvum	0	0	0	0	2	0	1	0	0	0	0	0	0	0	0	0	0	0	0	0	2	1	0	0	0	0	7	0	0	0	0	0
1005	Bacteria	NA	Proteobacteria	Alphaproteobacteria	Rhizobiales	Brucellaceae	Brucella	Brucella abortus	0	0	0	0	0	0	0	0	0	0	0	0	0	0	0	0	0	0	0	0	0	0	0	0	1	0	0	0	0	0	0	0
1006	Bacteria	NA	Proteobacteria	Alphaproteobacteria	Rhizobiales	Brucellaceae	Brucella	Brucella melitensis	0	0	0	0	0	0	0	0	0	0	1	0	0	0	0	0	0	0	0	0	0	0	0	0	0	0	0	0	0	0	0	0
1007	Eukaryota	Fungi	Ascomycota	Saccharomycetes	Saccharomycetales	Saccharomycetaceae	Saccharomyces	Saccharomyces pastorianus	0	0	0	0	0	0	0	0	0	0	0	0	0	0	0	0	0	0	0	0	0	1	0	0	0	0	0	0	0	0	0	0
1008	Bacteria	NA	Proteobacteria	Gammaproteobacteria	Enterobacteriales	Enterobacteriaceae	Providencia	Providencia alcalifaciens	1	1	9	0	5	7	11	1	0	0	0	14	4	1	11	13	93	31	7	3	68	1	3	0	0	0	221	10	209	18	21	29
1009	Bacteria	NA	Proteobacteria	Gammaproteobacteria	Enterobacteriales	Enterobacteriaceae	Providencia	Providencia rettgeri	0	0	6	7	4	1	4	1	5	0	0	10	7	1	5	11	64	61	18	1	31	7	6	1	0	0	113	5	116	17	27	19
1010	Bacteria	NA	Proteobacteria	Gammaproteobacteria	Pasteurellales	Pasteurellaceae	Haemophilus	Haemophilus influenzae	0	163	2798	1177	5116	4672	8421	24	1101	2147	32	5423	1365	349	4224	9925	28265	21303	23833	930	30103	2144	5057	1737	410	331	65224	6354	83474	7883	9519	6079
1011	Bacteria	NA	Proteobacteria	Betaproteobacteria	Neisseriales	Neisseriaceae	Neisseria	Neisseria gonorrhoeae	0	9	849	4	197	285	1816	27	17	20	2	62	597	185	187	2558	24955	724	1105	32	18348	20	64	3	0	2	31844	437	5259	74	11	313
1012	Archaea	NA	Euryarchaeota	Methanomicrobia	Methanomicrobiales	Methanoregulaceae	Methanosphaerula	Methanosphaerula palustris	0	0	0	0	0	0	0	0	0	0	0	0	0	0	0	0	0	0	1	0	0	0	0	0	0	0	0	0	0	0	1	0
1013	Bacteria	NA	Thermotogae	Thermotogae	Thermotogales	Thermotogaceae	Kosmotoga	Kosmotoga olearia	0	0	0	0	0	1	0	0	0	0	0	0	0	0	0	0	0	0	2	0	0	0	0	0	0	0	1	0	1	0	0	1
1014	Bacteria	NA	Actinobacteria	Actinobacteria	Coriobacteriales	Coriobacteriaceae	Atopobium	Atopobium parvulum	1426	720	14	14494	626	27985	32690	5334	1226	227	297	15255	419	4742	378	185	15073	124149	301273	8345	149116	208654	130483	8082	82824	59172	26388	443	8411	101551	68515	525
1015	Bacteria	NA	Actinobacteria	Actinobacteria	Actinomycetales	Tsukamurellaceae	Tsukamurella	Tsukamurella paurometabola	1	17	0	12	6	28	79	22	26	0	5	15	1	4	3	0	14	35	21	10	49	42	46	4	48	6	22	1	8	19	2	1
1016	Bacteria	NA	Bacteroidetes	Flavobacteriia	Flavobacteriales	Flavobacteriaceae	Capnocytophaga	Capnocytophaga ochracea	26	3131	6	449	998	4786	7046	748	901	109	196	521	322	18	85	626	26420	1791	2596	393	7103	756	1261	167	420	3	9875	618	4515	933	1495	1986
1017	Bacteria	NA	Firmicutes	Clostridia	Thermoanaerobacterales	Thermoanaerobacterales Family III. Incertae Sedis	Caldicellulosiruptor	Caldicellulosiruptor bescii	1	0	0	0	0	0	0	0	0	0	0	0	0	0	0	0	0	1	1	1	1	1	0	0	0	0	1	0	2	3	0	1
1018	Bacteria	NA	Planctomycetes	Planctomycetia	Planctomycetales	Planctomycetaceae	Planctomyces	Planctomyces limnophilus	0	0	0	0	1	1	0	0	0	0	0	0	0	0	0	0	0	0	0	0	2	0	1	0	0	0	0	1	0	0	0	0
1019	Bacteria	NA	Proteobacteria	Betaproteobacteria	NA	NA	Candidatus Accumulibacter	Candidatus Accumulibacter phosphatis	0	0	1	1	1	0	6	3	0	0	2	3	2	0	0	0	4	3	8	5	6	3	5	0	5	1	4	1	0	2	3	3
1020	Bacteria	NA	Proteobacteria	Gammaproteobacteria	Xanthomonadales	Xanthomonadaceae	Stenotrophomonas	Stenotrophomonas maltophilia	50	166	132	174	45	41	78	154	31	30	188	71	50	120	102	20	431	1167	110	173	34	54	53	23	50	21	448	139	122	471	508	259
1021	Eukaryota	Fungi	Ascomycota	Saccharomycetes	Saccharomycetales	NA	Candida	Candida sojae	1	0	0	0	0	0	0	6	0	0	0	1	0	0	0	0	0	0	0	0	0	0	0	0	0	0	0	0	0	0	0	0
1022	Bacteria	NA	Deferribacteres	Deferribacteres	Deferribacterales	Deferribacteraceae	Denitrovibrio	Denitrovibrio acetiphilus	0	0	0	0	0	0	0	0	0	0	0	0	0	0	0	0	1	0	0	0	0	1	1	0	0	0	2	0	0	0	1	0
1023	Bacteria	NA	Proteobacteria	Gammaproteobacteria	Oceanospirillales	Alcanivoracaceae	Kangiella	Kangiella koreensis	0	0	1	2	0	0	2	1	0	0	0	6	1	0	0	1	6	7	1	1	9	0	0	0	1	1	16	1	17	3	5	2
1024	Bacteria	NA	Fusobacteria	Fusobacteriia	Fusobacteriales	Leptotrichiaceae	Leptotrichia	Leptotrichia buccalis	3	579	82	446	2324	8457	3596	2288	4384	255	30	109	55	107	55	103	20589	13759	146476	1361	97983	6718	15382	1148	593	39	9929	571	6371	260397	3228	2226
1025	Viruses	NA	NA	NA	NA	Hytrosaviridae	Muscavirus	Musca hytrovirus	0	0	0	0	0	0	0	0	0	0	0	0	0	0	0	0	1	0	0	0	0	0	0	0	0	0	0	0	0	0	0	0
1026	Bacteria	NA	Proteobacteria	Deltaproteobacteria	Desulfovibrionales	Desulfovibrionaceae	Desulfovibrio	Desulfovibrio desulfuricans	0	0	0	0	0	0	2	0	1	0	1	5	0	0	0	0	0	0	9	1	1	0	0	0	1	0	0	0	1	0	0	0
1027	Bacteria	NA	Bacteroidetes	Flavobacteriia	Flavobacteriales	Flavobacteriaceae	Chryseobacterium	Chryseobacterium gleum	3	10	11	22	8	21	59	13	6	2	10	15	24	7	22	63	550	61	153	14	884	36	17	18	31	5	273	33	334	227	15	37
1028	Bacteria	NA	Firmicutes	Clostridia	Clostridiales	Peptostreptococcaceae	Peptoclostridium	Peptoclostridium difficile	0	0	21	0	0	0	0	0	0	1	0	0	0	0	10	52	0	0	0	0	0	0	0	0	0	1	0	0	0	0	0	0
1029	Bacteria	NA	Firmicutes	Clostridia	Clostridiales	Peptostreptococcaceae	Peptoclostridium	Peptoclostridium difficile	0	2	0	1	1	1	80	6	4	2	3	0	1	5	1	0	38	143	37	6	63	71	23	0	2	0	13	2	37	12	0	4
1030	Bacteria	NA	Actinobacteria	Actinobacteria	Actinomycetales	Corynebacteriaceae	Corynebacterium	Corynebacterium jeikeium	0	66	1	19	3	10	190	22	39	0	12	12	6	0	0	0	15	59	37	42	23	150	228	6	59	205	13	8	35	18	11	3
1031	Bacteria	NA	Firmicutes	Bacilli	Lactobacillales	Enterococcaceae	Enterococcus	Enterococcus faecalis	1	1	10	10	0	2	26	92	12	13	1	712	2	0	5	8	83	199	45	34	139	161	32	33	131	11	126	3	185	25	61	9
1032	Bacteria	NA	Firmicutes	Clostridia	Clostridiales	Clostridiales Family XI. Incertae Sedis	Finegoldia	Finegoldia magna	0	1	24	22	5	68	17	16	0	0	2	18	1	6	9	20	369	845	193	13	226	1563	56	49	28	36	299	19	310	57	171	40
1033	Bacteria	NA	Fusobacteria	Fusobacteriia	Fusobacteriales	Fusobacteriaceae	Fusobacterium	Fusobacterium nucleatum	7	72	4	12	267	157	268	30	125	29	7	152	41	7	6	58	4668	2880	1348	127	1589	4671	417	273	66	31	2088	105	1944	2892	586	1095
1034	Bacteria	NA	Firmicutes	Bacilli	Lactobacillales	Lactobacillaceae	Lactobacillus	Lactobacillus acidophilus	88	0	0	0	0	0	12	20	3	0	0	85	0	1	1	0	1	5	4	0	14	11	1	241	3	11	10	2	11	4	7	1
1035	Bacteria	NA	Firmicutes	Bacilli	Lactobacillales	Lactobacillaceae	Lactobacillus	Lactobacillus brevis	246	0	4	1	0	0	4	9	0	0	1	20	0	0	1	0	0	5	2	5	2	15	1	3	15	7	6	0	4	4	1	2
1036	Bacteria	NA	Firmicutes	Bacilli	Lactobacillales	Lactobacillaceae	Lactobacillus	Lactobacillus fermentum	151	0	1	0	0	0	2	28	0	0	0	1	0	0	0	0	0	0	0	1	0	0	0	14	5	0	0	0	0	4	0	0
1037	Bacteria	NA	Firmicutes	Bacilli	Lactobacillales	Lactobacillaceae	Lactobacillus	Lactobacillus gasseri	8386	0	1	10	0	0	36	329	8	0	5	363	0	0	5	0	3	23	3	2	5	30	2	1519	229	4138	8	2	5	5	228	4
1038	Bacteria	NA	Firmicutes	Bacilli	Lactobacillales	Lactobacillaceae	Lactobacillus	Lactobacillus jensenii	188	0	0	4	2	0	2	5	0	2	8	7	0	0	1	0	1	3	19	12	10	8	4	4	3	8	10	0	2	0	0	0
1039	Bacteria	NA	Firmicutes	Bacilli	Lactobacillales	Lactobacillaceae	Lactobacillus	Lactobacillus johnsonii	8	0	0	0	0	0	0	4	0	0	0	2	0	0	0	0	1	1	0	0	0	0	0	3	0	2	0	0	0	0	5	0
1040	Bacteria	NA	Firmicutes	Bacilli	Lactobacillales	Lactobacillaceae	Lactobacillus	Lactobacillus paracasei	33	0	27	0	0	1	1	0	1	0	0	1	0	0	0	0	0	3	8	1	1	1	3	0	1	0	2	0	0	2	0	0
1041	Bacteria	NA	Firmicutes	Bacilli	Lactobacillales	Lactobacillaceae	Lactobacillus	Lactobacillus plantarum	5	2	365	0	0	0	24	23	0	2	2	27	0	0	3	4	10	17	31	37	30	16	7	0	13	0	35	0	14	7	9	0
1042	Bacteria	NA	Firmicutes	Bacilli	Lactobacillales	Lactobacillaceae	Lactobacillus	Lactobacillus reuteri	275	0	0	1	0	0	1	22	0	0	0	15	0	0	0	0	0	1	1	0	2	31	0	7	1	11	2	0	0	1	2	0
1043	Bacteria	NA	Firmicutes	Bacilli	Lactobacillales	Lactobacillaceae	Lactobacillus	Lactobacillus salivarius	5	0	0	2	1	0	1	21	0	0	0	35	0	0	0	0	0	2	0	0	3	1	0	6	15	23	9	2	1	0	0	0
1044	Bacteria	NA	Actinobacteria	Actinobacteria	Actinomycetales	Mycobacteriaceae	Mycobacterium	Mycobacterium parascrofulaceum	0	9	1	0	4	4	56	5	8	1	2	4	0	4	0	0	4	32	14	5	11	14	34	0	26	4	6	1	2	8	4	0
1045	Bacteria	NA	Proteobacteria	Gammaproteobacteria	Enterobacteriales	Enterobacteriaceae	Proteus	Proteus mirabilis	0	1	7	1	5	0	16	2	1	1	0	17	6	1	4	10	106	55	15	7	62	8	10	0	4	1	261	2	259	23	30	14
1046	Bacteria	NA	Proteobacteria	Alphaproteobacteria	Rhodospirillales	Acetobacteraceae	Roseomonas	Roseomonas cervicalis	2	8	26	18	0	1	17	6	9	3	75	2	4	45	4	0	8	36	5	80	8	2	8	9	18	9	5	25	6	5	1	1
1047	Bacteria	NA	Bacteroidetes	Sphingobacteriia	Sphingobacteriales	Sphingobacteriaceae	Sphingobacterium	Sphingobacterium spiritivorum	0	0	2	2	1	2	2	1	0	0	0	1	0	0	0	0	64	227	16	2	49	1	0	2	1	0	7	1	2	53	71	73
1048	Bacteria	NA	Firmicutes	Bacilli	Bacillales	Staphylococcaceae	Staphylococcus	Staphylococcus epidermidis	0	0	1	2	0	2	0	14	0	4	3	1	0	2	1	0	0	2	1	0	5	3	1	1	6	0	2	7	1	4	1	0
1049	Bacteria	NA	Firmicutes	Bacilli	Bacillales	Staphylococcaceae	Staphylococcus	Staphylococcus epidermidis	0	2	10	0	0	9	1	30	0	0	2	1	5	4	0	0	0	4	1	4	0	1	15	2	1	3	1	8	1	1	3	0
1050	Bacteria	NA	Firmicutes	Bacilli	Bacillales	Staphylococcaceae	Staphylococcus	Staphylococcus epidermidis	0	0	2	4	0	17	2	8	0	0	1	0	2	4	0	1	2	8	0	2	2	2	3	0	12	2	5	11	6	1	0	1
1051	Bacteria	NA	Firmicutes	Bacilli	Bacillales	Staphylococcaceae	Staphylococcus	Staphylococcus caprae	0	0	2	0	2	0	9	17	0	2	1	18	1	1	2	0	6	29	8	8	24	9	10	4	12	2	39	0	21	4	8	1
1052	Bacteria	NA	Firmicutes	Bacilli	Lactobacillales	Streptococcaceae	Streptococcus	Streptococcus pneumoniae	2	8418	70438	108940	147546	147298	882757	98840	83526	684288	27128	127897	10934	3358	52673	74687	204897	267936	85050	26374	286838	192719	162151	16284	54744	855	429501	5613	330478	110327	43825	22969
1053	Bacteria	NA	Proteobacteria	Deltaproteobacteria	Desulfovibrionales	Desulfomicrobiaceae	Desulfomicrobium	Desulfomicrobium baculatum	0	0	1	0	0	0	2	0	0	0	0	1	1	0	0	2	1	11	17	0	0	2	1	1	0	0	0	0	1	4	0	1
1054	Bacteria	NA	Proteobacteria	Epsilonproteobacteria	Campylobacterales	Campylobacteraceae	Sulfurospirillum	Sulfurospirillum deleyianum	0	0	1	0	0	0	2	0	0	1	0	1	0	0	0	0	0	1	2	1	2	0	0	0	0	0	3	0	0	1	2	0
1055	Bacteria	NA	Synergistetes	Synergistia	Synergistales	Synergistaceae	Thermanaerovibrio	Thermanaerovibrio acidaminovorans	3	0	1	1	9	2	4	1	2	2	0	1	0	0	0	5	1	4	2	2	3	0	5	2	0	1	0	0	0	2	1	0
1056	Bacteria	NA	NA	NA	NA	NA	Thermobaculum	Thermobaculum terrenum	0	0	0	0	0	0	0	0	0	0	0	0	0	0	0	0	0	0	0	0	0	0	0	1	0	0	0	0	1	0	0	0
1057	Bacteria	NA	Actinobacteria	Actinobacteria	Acidimicrobiales	Acidimicrobiaceae	Acidimicrobium	Acidimicrobium ferrooxidans	0	0	0	2	0	0	8	0	1	0	0	1	0	0	0	1	0	4	3	0	4	2	0	0	0	1	2	0	2	1	0	0
1058	Bacteria	NA	Firmicutes	Clostridia	Clostridiales	Clostridiales Family XI. Incertae Sedis	Anaerococcus	Anaerococcus prevotii	0	0	10	11	6	12	17	10	13	1	4	7	6	1	0	1	83	64	102	5	17	128	185	37	30	257	51	11	106	56	57	31
1059	Bacteria	NA	Fusobacteria	Fusobacteriia	Fusobacteriales	Leptotrichiaceae	Sebaldella	Sebaldella termitidis	0	2	1	3	17	21	7	4	8	1	0	3	0	1	0	1	78	263	60	1	61	160	275	0	4	1	89	4	48	87	31	40
1060	Bacteria	NA	Proteobacteria	Deltaproteobacteria	Desulfovibrionales	Desulfovibrionaceae	Desulfovibrio	Desulfovibrio salexigens	0	0	0	0	0	2	0	0	0	0	0	0	0	1	0	0	0	2	7	1	4	0	2	0	0	1	2	0	1	1	1	0
1061	Bacteria	NA	Spirochaetes	Spirochaetia	Spirochaetales	Brachyspiraceae	Brachyspira	Brachyspira murdochii	0	1	0	1	0	0	0	0	0	0	0	1	0	1	0	0	0	1	3	1	3	1	2	1	0	0	2	1	2	0	0	0
1062	Bacteria	NA	Actinobacteria	Actinobacteria	Actinomycetales	Geodermatophilaceae	Geodermatophilus	Geodermatophilus obscurus	3	42	3	14	4	31	157	35	29	4	2	40	3	16	2	0	23	46	38	13	21	57	42	6	55	13	22	2	34	31	24	3
1063	Bacteria	NA	Actinobacteria	Actinobacteria	Actinomycetales	Gordoniaceae	Gordonia	Gordonia bronchialis	2	10	0	25	22	3	43	26	13	0	2	8	2	1	2	0	11	14	12	3	15	15	16	4	14	6	3	3	23	6	6	0
1064	Bacteria	NA	Deinococcus-Thermus	Deinococci	Thermales	Thermaceae	Meiothermus	Meiothermus silvanus	0	0	1	0	0	0	5	2	0	0	0	1	0	1	0	0	1	0	0	2	0	3	1	2	1	0	0	1	0	5	0	0
1065	Eukaryota	Fungi	Basidiomycota	Ustilaginomycetes	Ustilaginales	Ustilaginaceae	Ustilago	Ustilago maydis	0	0	0	0	0	0	0	0	0	0	0	0	0	0	0	0	0	0	0	0	0	0	0	0	0	0	0	0	1	0	0	0
1066	Bacteria	NA	Proteobacteria	Gammaproteobacteria	Enterobacteriales	Enterobacteriaceae	Yersinia	Yersinia aldovae	0	0	0	1	2	0	6	0	0	0	1	2	0	0	0	1	6	0	2	6	15	2	1	0	0	0	20	2	23	2	2	2
1067	Bacteria	NA	Proteobacteria	Gammaproteobacteria	Enterobacteriales	Enterobacteriaceae	Yersinia	Yersinia rohdei	0	0	1	1	0	1	2	0	0	0	2	5	1	1	0	2	15	8	3	5	10	0	6	0	3	0	39	2	46	8	12	2
1068	Bacteria	NA	Proteobacteria	Gammaproteobacteria	Enterobacteriales	Enterobacteriaceae	Yersinia	Yersinia ruckeri	0	1	0	1	1	1	3	0	1	0	2	4	1	1	0	2	16	8	4	8	16	2	1	0	4	0	58	2	69	1	3	9
1069	Bacteria	NA	Proteobacteria	Gammaproteobacteria	Enterobacteriales	Enterobacteriaceae	Yersinia	Yersinia kristensenii	0	0	0	0	1	0	5	0	0	0	1	1	1	0	1	2	12	10	0	3	5	0	0	0	0	1	44	4	82	1	3	2
1070	Bacteria	NA	Firmicutes	Bacilli	Bacillales	Bacillaceae	Bacillus	Bacillus thuringiensis	0	0	0	0	0	0	0	3	1	0	0	2	0	0	0	0	1	1	2	1	1	3	0	1	3	0	4	0	3	0	0	0
1071	Bacteria	NA	Firmicutes	Bacilli	Bacillales	Bacillaceae	Bacillus	Bacillus thuringiensis	0	1	0	0	0	0	3	2	0	0	0	4	0	0	0	0	0	4	1	0	8	1	2	0	1	0	2	0	3	1	2	0
1072	Bacteria	NA	Firmicutes	Bacilli	Bacillales	Bacillaceae	Bacillus	Bacillus thuringiensis	0	0	0	0	0	0	3	18	0	0	0	10	0	0	0	0	0	3	1	3	3	0	0	0	3	0	10	0	3	2	13	0
1073	Bacteria	NA	Firmicutes	Bacilli	Bacillales	Bacillaceae	Bacillus	Bacillus thuringiensis	0	0	0	0	0	0	0	0	0	0	0	1	0	0	0	0	0	0	1	0	0	2	0	0	0	0	1	0	2	0	0	0
1074	Bacteria	NA	Firmicutes	Bacilli	Bacillales	Bacillaceae	Bacillus	Bacillus thuringiensis	1259	1267	1181	1321	851	497	757	1157	540	711	296	816	212	286	470	147	401	397	455	1302	503	304	413	433	491	349	388	278	641	713	375	685
1075	Bacteria	NA	Firmicutes	Bacilli	Bacillales	Bacillaceae	Bacillus	Bacillus thuringiensis	1171	1247	894	1118	724	515	621	837	470	621	286	547	210	241	433	194	415	226	305	1018	333	229	259	392	351	275	213	212	473	528	349	526
1076	Bacteria	NA	Firmicutes	Bacilli	Bacillales	Bacillaceae	Bacillus	Bacillus thuringiensis	0	0	0	0	0	0	4	6	2	0	0	4	0	0	0	0	3	0	2	1	0	2	1	1	0	0	3	0	4	3	0	0
1077	Bacteria	NA	Firmicutes	Bacilli	Bacillales	Bacillaceae	Bacillus	Bacillus thuringiensis	0	0	0	0	0	0	0	0	0	1	0	5	0	0	0	2	0	0	0	0	5	0	0	7	0	0	0	0	0	0	0	0
1078	Bacteria	NA	Proteobacteria	Betaproteobacteria	Neisseriales	Neisseriaceae	Neisseria	Neisseria gonorrhoeae	0	1	1	0	0	1	217	6	4	3	0	1	472	43	7	298	2558	82	7	0	3772	20	2	0	0	0	2157	26	1919	3	2	76
1079	Eukaryota	NA	NA	Cryptophyta	Pyrenomonadales	Pyrenomonadaceae	Rhodomonas	Rhodomonas salina	0	0	0	0	0	0	0	0	0	0	0	1	0	0	0	0	0	0	3	0	0	0	0	0	0	0	2	0	0	0	0	0
1080	Bacteria	NA	Firmicutes	Bacilli	Lactobacillales	Enterococcaceae	Enterococcus	Enterococcus faecium	0	1	71	1	0	2	13	15	0	1	3	55	0	1	0	0	152	40	7	16	37	26	5	2	12	1	43	0	29	4	20	0
1081	Bacteria	NA	Planctomycetes	Planctomycetia	Planctomycetales	Planctomycetaceae	Pirellula	Pirellula staleyi	0	0	0	0	0	0	2	0	0	0	0	1	0	0	0	1	0	0	0	0	1	1	3	0	3	0	0	0	1	1	0	0
1082	Bacteria	NA	Bacteroidetes	Flavobacteriia	Flavobacteriales	Flavobacteriaceae	NA	Flavobacteriaceae bacterium 3519-10	0	0	0	0	1	4	6	0	2	3	2	13	2	0	6	2	90	62	11	2	206	7	12	0	1	0	187	3	64	26	25	5
1083	Bacteria	NA	Cyanobacteria	NA	Nostocales	Nostocaceae	Raphidiopsis	Raphidiopsis brookii	0	0	0	0	0	0	0	0	0	0	0	1	1	0	0	1	0	0	1	0	0	0	0	0	0	0	0	0	0	0	0	0
1084	Bacteria	NA	Firmicutes	Bacilli	Bacillales	Bacillaceae	Bacillus	Bacillus subtilis	0	4	0	0	0	0	3	0	0	0	0	54	1	1	1	1	4	13	15	6	6	12	0	0	4	2	7	0	8	0	4	0
1085	Bacteria	NA	Firmicutes	Bacilli	Lactobacillales	Enterococcaceae	Enterococcus	Enterococcus faecium	0	0	22	2	0	1	6	1	3	0	0	9	0	0	1	0	11	30	4	1	0	4	3	4	2	0	26	0	4	2	8	0
1086	Bacteria	NA	Firmicutes	Bacilli	Lactobacillales	Enterococcaceae	Enterococcus	Enterococcus faecium	0	0	11	0	0	0	2	0	0	0	0	0	0	0	0	0	1	2	0	0	3	0	0	0	1	0	1	0	1	0	0	0
1087	Bacteria	NA	Proteobacteria	Betaproteobacteria	Burkholderiales	Comamonadaceae	Acidovorax	Acidovorax ebreus	69	94	86	100	39	28	58	181	73	17	129	63	37	128	73	31	36	158	19	150	30	50	50	26	71	11	358	302	64	172	46	29
1088	Bacteria	NA	Firmicutes	Clostridia	Clostridiales	Clostridiaceae	Clostridium	Clostridium carboxidivorans	0	0	0	0	2	2	1	1	2	2	0	18	0	0	0	0	27	19	16	0	29	3	1	1	0	5	13	0	9	0	2	8
1089	Bacteria	NA	Firmicutes	Clostridia	Clostridiales	Clostridiaceae	Clostridium	Clostridium botulinum	0	0	0	1	2	0	3	0	2	0	0	0	3	0	0	7	3	1	63	3	4	15	1	0	0	0	2	0	1	0	0	1
1090	Bacteria	NA	Firmicutes	Clostridia	Clostridiales	Clostridiaceae	Clostridium	Clostridium botulinum	0	1	1	0	1	1	1	5	0	0	0	0	0	0	0	0	1	4	54	1	11	0	0	0	1	0	1	0	7	23	2	8
1091	Bacteria	NA	Proteobacteria	Gammaproteobacteria	Pasteurellales	Pasteurellaceae	Actinobacillus	Actinobacillus pleuropneumoniae	0	4	498	182	142	69	407	31	109	34	2	402	609	683	534	5539	11502	2620	391	67	9144	330	469	10	57	6	13246	4138	11783	789	469	709
1092	Viruses	NA	NA	NA	Caudovirales	Siphoviridae	NA	Streptococcus phage PH15	0	2	3	5	439	167	1328	12	16	8	8	207	1	0	11	1	47	84	17	6	10	30	66	0	0	5	34	3	30	11	16	6
1093	Bacteria	NA	Actinobacteria	Actinobacteria	Bifidobacteriales	Bifidobacteriaceae	Bifidobacterium	Bifidobacterium longum	27	0	3	93	0	2	25	50	5	8	0	2	1	0	0	0	18	2	6	39	8575	8	4	0	7	2	2	7	1	16	7	0
1094	Bacteria	NA	Proteobacteria	Epsilonproteobacteria	Campylobacterales	Helicobacteraceae	Helicobacter	Helicobacter canadensis	0	0	0	0	0	0	0	0	0	0	0	1	0	0	0	0	0	0	0	0	1	0	0	0	0	1	3	0	2	4	0	0
1095	Bacteria	NA	Proteobacteria	Epsilonproteobacteria	Campylobacterales	Helicobacteraceae	Helicobacter	Helicobacter pullorum	0	0	0	0	1	0	0	0	0	0	0	0	0	0	0	0	0	1	1	0	3	1	0	0	1	0	0	0	0	0	0	1
1096	Viruses	NA	NA	NA	Caudovirales	Siphoviridae	NA	Mycobacterium phage Lockley	0	0	0	0	0	0	0	0	0	0	0	0	0	0	0	0	0	0	0	0	0	1	0	0	0	0	0	0	0	0	0	0
1097	Archaea	NA	Euryarchaeota	Halobacteria	Halobacteriales	Halobacteriaceae	Haloterrigena	Haloterrigena turkmenica	0	3	0	0	2	0	5	1	1	0	0	0	0	0	0	0	0	2	2	1	1	3	0	0	0	0	1	0	0	3	1	0
1098	Bacteria	NA	Firmicutes	Bacilli	Lactobacillales	Lactobacillaceae	Lactobacillus	Lactobacillus casei	520	4	1011	0	0	0	85	19	2	0	0	0	0	0	1	0	4	2	2	0	0	30	0	9	20	0	8	0	10	2	1	1
1099	Bacteria	NA	Firmicutes	Bacilli	Bacillales	Bacillaceae	Geobacillus	Geobacillus sp. Y412MC61	0	0	1	3	0	0	0	0	0	0	0	0	0	0	0	0	0	1	3	1	0	2	0	0	0	0	1	0	0	0	4	0
1100	Bacteria	NA	Firmicutes	Bacilli	Lactobacillales	Enterococcaceae	Enterococcus	Enterococcus faecium	3	1	10	1	0	2	10	135	1	35	0	1488	0	0	0	0	1	3	33	5	9	21	0	3	2	0	5	0	16	0	54	0
1101	Bacteria	NA	Proteobacteria	Gammaproteobacteria	Enterobacteriales	Enterobacteriaceae	Yersinia	Yersinia pestis	0	0	0	0	0	0	0	0	0	0	1	0	0	0	0	0	0	0	0	0	0	0	0	0	0	0	1	0	0	0	0	0
1102	Bacteria	NA	Firmicutes	Bacilli	Bacillales	Bacillaceae	Bacillus	Bacillus megaterium	0	0	1	4	2	1	7	1	1	0	0	16	0	0	3	2	5	82	5	6	41	0	4	4	7	0	2	2	5	9	1	0
1103	Bacteria	NA	Firmicutes	Bacilli	Lactobacillales	Streptococcaceae	Streptococcus	Streptococcus gallolyticus	1	4	5	2	12	8	15	48	3	9	5	127	1	0	3	1	15	33	114	9	29	86	544	4	14	8	75	0	38	7	20	1
1104	Viruses	NA	NA	NA	Caudovirales	Siphoviridae	NA	Mycobacterium phage Phaedrus	0	0	0	0	0	0	0	0	0	0	0	0	0	0	0	0	0	0	0	0	0	1	0	0	0	0	0	0	0	0	0	0
125	Bacteria	NA	Proteobacteria	Gammaproteobacteria	Pseudomonadales	Pseudomonadaceae	Pseudomonas	Pseudomonas syringae	2	2	3	8	1	2	3	1	3	0	126	0	0	4	0	0	0	1	6	100	2	3	2	4	1	0	7	1	2	1	0	0
1106	Bacteria	NA	Proteobacteria	Betaproteobacteria	Neisseriales	Neisseriaceae	Neisseria	Neisseria cinerea	0	15	316	23	96	77	1700	39	26	7	1	41	730	143	407	2424	6487	565	6298	11	17073	34	63	18	6	9	8629	330	7835	631	44	475
1107	Bacteria	NA	Proteobacteria	Betaproteobacteria	Neisseriales	Neisseriaceae	Neisseria	Neisseria elongata	1	1742	81	19	844	163	15919	39	141	28	9	387	2359	136	133	4420	4882	827	495	63	22278	41	36	219	193	12	12130	3528	6880	220	20	441
1108	Bacteria	NA	Proteobacteria	Betaproteobacteria	Neisseriales	Neisseriaceae	Neisseria	Neisseria flavescens	0	33	1831	35	111	101	3638	277	55	232	4	860	6103	539	1889	22687	68619	4905	605	67	117166	500	655	31	70	20	85374	214	52490	624	78	4222
1109	Bacteria	NA	Proteobacteria	Betaproteobacteria	Neisseriales	Neisseriaceae	Neisseria	Neisseria lactamica	1	20	190	4	45	58	294	90	27	6	1	726	410	27	49	3744	3426	980	157	23	7792	521	95	12	14	6	8926	207	9196	328	149	413
1110	Bacteria	NA	Proteobacteria	Betaproteobacteria	Neisseriales	Neisseriaceae	Neisseria	Neisseria mucosa	8	61	699	128	55	126	542921	68	1601	25	9	110	4153	711	1751	12410	8907	23072	3737	38	44650	333	1000	58	13	5	25658	4998	33406	318	69	942
1111	Bacteria	NA	Proteobacteria	Betaproteobacteria	Neisseriales	Neisseriaceae	Neisseria	Neisseria polysaccharea	1	3	64	13	12	16	429	23	6	19	1	23	834	24	89	1783	6032	893	296	0	16549	13	12	7	0	3	4624	218	4956	84	166	293
1112	Bacteria	NA	Proteobacteria	Betaproteobacteria	Neisseriales	Neisseriaceae	Neisseria	Neisseria subflava	2	436	63818	909	2851	285	9247	4749	178	4608	31	3186	182895	76237	65568	948401	2651072	98717	6046	83	2948305	32488	12247	280	29	69	1903988	13634	2707065	28969	377	82758
1113	Bacteria	NA	Firmicutes	Bacilli	Bacillales	NA	Gemella	Gemella haemolysans	9	1876	7955	1836	9203	10634	87202	14269	23601	1231	928	307	5211	731	3966	2596	7400	26523	20383	995	51489	4229	9710	755	3008	583	20028	3547	29407	3709	2594	2706
1114	Bacteria	NA	Proteobacteria	Alphaproteobacteria	Rhizobiales	Brucellaceae	Brucella	Brucella melitensis	0	5	0	0	0	0	2	1	0	0	1	1	0	1	0	0	0	0	0	2	0	0	3	2	0	1	0	0	1	7	0	0
1115	Bacteria	NA	Firmicutes	Bacilli	Lactobacillales	Enterococcaceae	Enterococcus	Enterococcus faecium	0	0	3	0	0	0	5	20	0	2	0	84	0	0	3	0	4	7	0	0	5	27	2	1	13	0	32	0	4	0	8	0
1116	Bacteria	NA	Deinococcus-Thermus	Deinococci	Deinococcales	Deinococcaceae	Deinococcus	Deinococcus deserti	2	1	9	1	1	1	8	1	0	0	1	0	0	0	0	3	6	13	3	1	8	4	4	0	3	0	4	0	1	2	2	1
1117	Bacteria	NA	Actinobacteria	Actinobacteria	Bifidobacteriales	Bifidobacteriaceae	Bifidobacterium	Bifidobacterium pseudocatenulatum	52	425	62	100	8	52	33	6	23	149	1	243	0	1	0	1	26	49	66	84	43	401	158	0	484	416	3	0	3	18	5	1
1118	Bacteria	NA	Proteobacteria	Betaproteobacteria	Neisseriales	Neisseriaceae	Neisseria	Neisseria sicca	13	122	653	2223	372	249	36737	151	181	77	18	151	7198	2589	3498	31041	43974	34115	39599	60	109256	2837	437	303	21	5	38875	28232	27265	130	39	1144
1119	Bacteria	NA	Firmicutes	Bacilli	Lactobacillales	Enterococcaceae	Enterococcus	Enterococcus faecium	0	0	5	0	0	0	1	8	0	0	0	3	0	0	0	0	8	1	0	0	38	1	1	1	2	0	7	0	1	0	0	0
1120	Archaea	NA	Euryarchaeota	Methanomicrobia	Methanosarcinales	Methanosarcinaceae	Methanohalophilus	Methanohalophilus mahii	0	0	0	0	0	0	0	0	0	0	0	0	0	0	0	0	0	0	0	0	0	1	0	0	0	0	0	0	0	0	0	0
1121	Archaea	NA	Euryarchaeota	Halobacteria	Halobacteriales	Halobacteriaceae	Natrialba	Natrialba magadii	2	0	0	2	0	0	1	1	0	0	0	0	1	0	0	0	0	3	0	0	1	1	0	0	0	0	0	0	0	0	0	0
1122	Eukaryota	Fungi	Ascomycota	Saccharomycetes	Saccharomycetales	NA	Candida	Candida parapsilosis	0	0	0	0	0	0	1	0	0	0	0	1	0	0	0	0	0	0	0	0	0	0	0	0	0	0	0	0	0	0	0	0
1123	Bacteria	NA	Firmicutes	Bacilli	Bacillales	Staphylococcaceae	Staphylococcus	Staphylococcus aureus	0	0	0	15	3	0	3	4	0	0	0	13	0	0	0	0	3	4	2	2	10	1	4	0	1	0	35	2	108	0	1	0
1124	Bacteria	NA	Firmicutes	Bacilli	Bacillales	Staphylococcaceae	Staphylococcus	Staphylococcus aureus	0	0	0	1	0	0	0	0	0	0	1	0	0	1	0	0	0	1	0	0	0	0	0	0	0	2	0	0	0	0	0	0
1125	Bacteria	NA	Actinobacteria	Actinobacteria	Actinomycetales	Corynebacteriaceae	Corynebacterium	Corynebacterium glucuronolyticum	0	53	2	15	2	20	80	46	15	0	4	32	10	4	0	5	19	90	179	20	56	203	65	2	1069	365	24	1	9	44	14	0
1126	Bacteria	NA	Actinobacteria	Actinobacteria	Actinomycetales	Actinomycetaceae	Mobiluncus	Mobiluncus curtisii	0	7	0	3	5	4	9	1	10	0	0	13	1	0	1	2	75	7	404	0	193	909	12	0	14	0	27	1	5	50	51	15
1127	Bacteria	NA	Actinobacteria	Actinobacteria	Bifidobacteriales	Bifidobacteriaceae	Bifidobacterium	Bifidobacterium longum	2	22	3	67	2	99	75	15	24	44	0	116	0	0	0	1	62	102	645	29	5910	1077	409	3	39	49	149	1	47	448	54	46
1128	Eukaryota	Fungi	Ascomycota	Saccharomycetes	Saccharomycetales	NA	Candida	Candida viswanathii	3	0	1	0	0	0	1	1	0	0	0	3	0	0	0	0	0	0	0	0	0	0	0	0	1	0	0	0	0	0	0	0
1129	Bacteria	NA	Proteobacteria	Gammaproteobacteria	Enterobacteriales	Enterobacteriaceae	Salmonella	Salmonella enterica	0	0	0	0	0	0	0	0	0	0	35	0	0	0	0	0	0	0	0	1	0	0	0	1	0	2	0	0	0	0	0	0
1130	Bacteria	NA	Proteobacteria	Gammaproteobacteria	Enterobacteriales	Enterobacteriaceae	Salmonella	Salmonella enterica	0	0	0	0	0	0	0	0	0	0	1	0	0	0	0	0	0	0	0	0	0	0	0	0	0	0	0	0	0	0	0	0
1131	Bacteria	NA	Proteobacteria	Gammaproteobacteria	Enterobacteriales	Enterobacteriaceae	Escherichia	Escherichia coli	1	0	0	0	0	0	0	0	1	0	0	2	1	3	3	0	1	0	0	2	0	4	0	0	0	0	2	0	0	0	0	0
1132	Bacteria	NA	Proteobacteria	Gammaproteobacteria	Enterobacteriales	Enterobacteriaceae	Escherichia	Escherichia coli	6	0	0	1	0	0	2	1	0	1	10	1	2	2	2	0	0	2	0	55	0	0	2	5	0	7	3	0	0	2	0	4
1133	Bacteria	NA	Proteobacteria	Gammaproteobacteria	Enterobacteriales	Enterobacteriaceae	Escherichia	Escherichia coli	0	0	0	0	0	0	1	0	0	1	4	0	0	0	2	0	0	1	1	4	0	0	0	0	0	1	3	0	6	2	0	0
1134	Bacteria	NA	Tenericutes	Mollicutes	Mycoplasmatales	Mycoplasmataceae	Ureaplasma	Ureaplasma urealyticum	0	0	0	0	0	3	0	2	0	1	0	0	2	0	0	1	0	0	3	0	3	0	5	0	0	32	26	0	0	0	4	0
1135	Bacteria	NA	Cyanobacteria	NA	Nostocales	Nostocaceae	Trichormus	Trichormus azollae	0	0	0	0	0	0	3	0	0	0	0	1	0	0	0	0	20	2	6	0	2	3	6	0	0	0	0	0	0	1	2	0
1136	Bacteria	NA	Firmicutes	Bacilli	Bacillales	Listeriaceae	Listeria	Listeria monocytogenes	0	0	1	0	0	0	4	21	0	0	1	10	1	0	1	2	13	40	1	0	18	4	2	0	10	1	23	0	10	2	6	0
1137	Bacteria	NA	Chloroflexi	Dehalococcoidia	NA	NA	Dehalogenimonas	Dehalogenimonas lykanthroporepellens	0	0	0	0	0	2	1	0	0	0	0	0	0	0	0	0	1	3	3	0	4	0	1	0	0	0	2	0	0	0	0	0
1138	Eukaryota	Fungi	Ascomycota	Sordariomycetes	Hypocreales	Clavicipitaceae	Metarhizium	Metarhizium anisopliae	0	0	0	0	0	0	0	0	0	0	0	0	0	0	0	0	0	0	0	0	0	1	0	0	0	0	0	0	0	0	0	0
1139	Bacteria	NA	Bacteroidetes	Bacteroidia	Bacteroidales	Prevotellaceae	Prevotella	Prevotella bivia	177	153	24	1495	468	527	1183	3936	277	212	70	18935	123	341	115	108	5594	12778	93159	362	43720	33704	29674	1906	3082	4483	15529	258	11776	48390	10024	1237
1140	Bacteria	NA	Bacteroidetes	Bacteroidia	Bacteroidales	Prevotellaceae	Prevotella	Prevotella melaninogenica	886	7910	506	76903	29811	31961	35404	64661	13184	1485	1605	236729	4860	28042	35034	6957	155288	1251628	2179321	34484	2185628	1691157	2304020	142181	143811	86791	1728729	12140	1238384	734370	988133	36171
1141	Bacteria	NA	Bacteroidetes	Bacteroidia	Bacteroidales	Porphyromonadaceae	Porphyromonas	Porphyromonas endodontalis	2128	1643	0	1422	28990	580	10835	674	88	3608	18	58	9079	258	932	2546	582	897	20194	3946	20804	1180	728	3038	401	5190	2700	670	3691	33774	8049	19223
1142	Bacteria	NA	Bacteroidetes	Flavobacteriia	Flavobacteriales	Flavobacteriaceae	Capnocytophaga	Capnocytophaga sputigena	2	1753	7	121	315	1442	992	70	421	166	33	190	434	10	78	1634	65794	1159	3435	112	22624	722	1493	132	51	5	37689	690	23843	705	1211	1997
1143	Bacteria	NA	Bacteroidetes	Flavobacteriia	Flavobacteriales	Flavobacteriaceae	Capnocytophaga	Capnocytophaga gingivalis	3	2759	427	275	653	3058	7214	50	3797	111	361	210	366	13	403	1965	29686	3831	1741	343	10556	358	465	90	179	23	146309	1284	44662	399	579	20270
1144	Bacteria	NA	Actinobacteria	Actinobacteria	Coriobacteriales	Coriobacteriaceae	Atopobium	Atopobium rimae	2236	836	10	1671	484	6409	13269	389	982	411	311	2521	542	3000	37	379	121	1301	6570	634	2309	2452	3096	2044	2467	5537	798	21	83	3771	3526	988
1145	Bacteria	NA	Actinobacteria	Actinobacteria	Bifidobacteriales	Bifidobacteriaceae	Gardnerella	Gardnerella vaginalis	2	11	5	33	6	10	21	68	7	13	4	18	1	2	2	12	60	70	378	14	203	841	64	2	33	34	42	5	117	372	107	23
1146	Bacteria	NA	Actinobacteria	Actinobacteria	Actinomycetales	Propionibacteriaceae	Propionibacterium	Propionibacterium acnes	238	800	511	1395	208	622	766	2538	575	142	691	281	474	2171	392	133	393	696	164	633	154	1565	376	251	484	69	1348	5551	905	517	1088	229
1147	Bacteria	NA	Actinobacteria	Actinobacteria	Actinomycetales	Micrococcaceae	Rothia	Rothia mucilaginosa	49	6139	8329	7319	6871	3339	159622	88853	5127	7378	5013	211990	21995	9485	11650	56275	8025	352735	12570	42270	463363	57293	5147	7999	112369	9845	516204	3692	640267	15070	6673	7196
1148	Bacteria	NA	Actinobacteria	Actinobacteria	Actinomycetales	Corynebacteriaceae	Corynebacterium	Corynebacterium amycolatum	3	10	44	239	4	18	60	32	11	2	377	4	11	4	9	1	8	40	21	358	10	28	61	183	37	297	7	3	10	6	5	6
1149	Bacteria	NA	Actinobacteria	Actinobacteria	Actinomycetales	Corynebacteriaceae	Corynebacterium	Corynebacterium tuberculostearicum	24	52	58	57	10	44	173	603	24	10	31	66	15	34	7	4	27	63	37	47	29	32	57	14	62	13	36	46	30	44	17	10
1150	Bacteria	NA	Firmicutes	Bacilli	Bacillales	Staphylococcaceae	Staphylococcus	Staphylococcus capitis	2	25	7	11	3	4	14	53	4	2	11	22	8	19	0	3	13	21	12	25	16	88	5	25	12	5	72	49	35	8	2	5
1151	Bacteria	NA	Proteobacteria	Gammaproteobacteria	Pseudomonadales	Moraxellaceae	Enhydrobacter	Enhydrobacter aerosaccus	1	14	6	37	6	11	8	51	8	16	20	6	6	17	6	5	25	44	16	34	4	14	10	2	12	8	33	163	48	63	25	47
1152	Bacteria	NA	Proteobacteria	Epsilonproteobacteria	Campylobacterales	Campylobacteraceae	Campylobacter	Campylobacter rectus	4270	132	6	25	2860	193	7190	1946	1997	194	61	152	1725	159	112	1920	1124	11469	5216	522	4725	304	561	1676	769	98	1909	98	441	11909	872	4713
1153	Bacteria	NA	Proteobacteria	Epsilonproteobacteria	Campylobacterales	Campylobacteraceae	Campylobacter	Campylobacter showae	140	760	0	75	632	1075	820	59	114	29	31	330	77	20	351	298	6547	94847	656	127	3058	467	4966	166	192	28	3998	131	570	84122	397	6958
1154	Bacteria	NA	Proteobacteria	Epsilonproteobacteria	Campylobacterales	Campylobacteraceae	Campylobacter	Campylobacter gracilis	342	799	0	214	490	2426	11731	1562	2976	32	812	351	175	51	7	103	174	1324	680	868	365	302	350	347	611	3368	572	47	108	27796	653	196
1155	Bacteria	NA	Firmicutes	Bacilli	Lactobacillales	Streptococcaceae	Streptococcus	Streptococcus equi	0	13	0	11	80	20	177	35	19	14	3	198	3	6	8	27	213	1366	73	451	292	339	249	31	57	129	569	31	1319	414	73	230
1156	Bacteria	NA	Firmicutes	Bacilli	Bacillales	Staphylococcaceae	Staphylococcus	Staphylococcus aureus	0	0	0	0	0	0	0	0	0	0	0	0	0	0	0	0	0	0	0	0	0	0	0	0	0	1	0	0	0	0	0	0
1157	Bacteria	NA	Firmicutes	Bacilli	Bacillales	Staphylococcaceae	Staphylococcus	Staphylococcus aureus	0	0	0	0	0	0	0	0	0	0	0	0	0	0	0	0	0	1	0	0	0	0	0	0	0	0	0	0	0	0	0	0
1158	Bacteria	NA	Firmicutes	Bacilli	Bacillales	Staphylococcaceae	Staphylococcus	Staphylococcus aureus	0	0	0	0	0	0	0	0	0	0	0	0	0	0	0	0	0	1	0	0	0	0	0	0	0	0	0	0	0	0	0	0
1159	Bacteria	NA	Firmicutes	Bacilli	Bacillales	Staphylococcaceae	Staphylococcus	Staphylococcus aureus	0	0	0	0	0	0	0	0	0	0	0	0	0	0	0	0	0	0	0	0	0	0	0	0	0	0	0	0	1	0	0	0
1160	Bacteria	NA	Firmicutes	Bacilli	Bacillales	Staphylococcaceae	Staphylococcus	Staphylococcus aureus	0	0	1	0	0	0	0	0	0	0	0	0	0	0	0	0	0	0	0	0	0	0	1	0	0	0	1	1	0	0	0	0
1161	Bacteria	NA	Firmicutes	Clostridia	Thermoanaerobacterales	Thermoanaerobacterales Family III. Incertae Sedis	Thermosediminibacter	Thermosediminibacter oceani	0	0	0	0	0	0	0	0	0	0	0	0	0	1	0	1	2	19	10	0	21	7	24	1	1	0	2	0	5	1	11	2
1162	Bacteria	NA	Firmicutes	Clostridia	Clostridiales	Syntrophomonadaceae	Dethiobacter	Dethiobacter alkaliphilus	0	0	0	2	1	1	0	2	0	0	0	3	0	0	0	0	2	5	12	1	8	9	13	0	3	0	3	1	0	4	3	0
1163	Bacteria	NA	Proteobacteria	Alphaproteobacteria	Sphingomonadales	Sphingomonadaceae	Zymomonas	Zymomonas mobilis	0	0	0	0	0	0	0	0	0	0	0	0	0	0	0	0	0	0	0	0	0	0	0	0	0	0	0	0	1	0	0	0
1164	Eukaryota	NA	NA	Cryptophyta	Pyrenomonadales	Geminigeraceae	Guillardia	Guillardia theta	54	600	396	678	774	459	615	363	273	291	180	120	435	435	339	468	84	72	105	642	141	132	123	50	204	162	16	249	166	234	240	282
1165	Bacteria	NA	Proteobacteria	Gammaproteobacteria	Chromatiales	Halothiobacillaceae	Halothiobacillus	Halothiobacillus neapolitanus	0	0	0	1	0	0	1	1	1	0	6	0	0	3	0	0	3	3	0	3	2	3	3	1	2	2	4	1	0	0	1	0
1166	Bacteria	NA	Proteobacteria	Deltaproteobacteria	Desulfovibrionales	Desulfohalobiaceae	Desulfonatronospira	Desulfonatronospira thiodismutans	0	0	0	0	0	0	2	0	0	0	0	0	0	1	0	0	0	0	1	0	1	0	0	0	0	0	0	0	0	0	0	0
1167	Bacteria	NA	Proteobacteria	Epsilonproteobacteria	Campylobacterales	Helicobacteraceae	Helicobacter	Helicobacter winghamensis	0	0	0	0	0	0	0	0	0	0	0	0	0	0	0	0	4	0	0	0	11	0	0	0	0	0	1	3	0	0	0	0
1168	Bacteria	NA	Proteobacteria	Betaproteobacteria	Burkholderiales	Oxalobacteraceae	Oxalobacter	Oxalobacter formigenes	0	0	0	0	0	0	2	0	0	0	0	1	0	0	0	1	0	1	0	0	4	1	0	0	0	0	1	0	0	0	1	0
1169	Eukaryota	NA	Bacillariophyta	Bacillariophyceae	Naviculales	Phaeodactylaceae	Phaeodactylum	Phaeodactylum tricornutum	287	261	160	192	337	301	315	224	178	107	52	92	187	86	118	195	28	21	37	167	70	34	33	98	92	106	46	60	35	131	70	68
1170	Bacteria	NA	Firmicutes	Bacilli	Lactobacillales	Lactobacillaceae	Lactobacillus	Lactobacillus reuteri	928	0	0	12	1	1	26	7	5	1	0	63	0	0	1	1	0	6	8	1	11	9056	6	28	1	1	4	0	3	3	0	2
1171	Bacteria	NA	Proteobacteria	Betaproteobacteria	Neisseriales	Neisseriaceae	Laribacter	Laribacter hongkongensis	0	2	0	1	0	0	21	2	2	0	3	3	0	0	1	3	5	12	12	5	14	2	2	0	3	2	9	2	2	0	0	1
1172	Bacteria	NA	Proteobacteria	Gammaproteobacteria	Pseudomonadales	Moraxellaceae	Acinetobacter	Acinetobacter baumannii	0	0	0	0	0	0	0	0	0	0	5	0	0	0	0	0	0	0	0	2	0	0	0	0	0	0	0	0	0	0	0	0
1409	Bacteria	NA	Proteobacteria	Gammaproteobacteria	Pseudomonadales	Pseudomonadaceae	Pseudomonas	Pseudomonas syringae	0	0	0	2	0	0	2	0	0	0	30	0	0	1	0	0	0	0	0	44	0	3	0	3	1	6	0	1	0	2	0	0
1174	Bacteria	NA	Proteobacteria	Gammaproteobacteria	Enterobacteriales	Enterobacteriaceae	Pectobacterium	Pectobacterium carotovorum	0	8	7	1	2	2	4	8	2	2	18	3	3	5	3	1	8	5	3	18	14	2	1	7	3	12	11	11	5	5	3	4
1175	Eukaryota	Fungi	Ascomycota	Saccharomycetes	Saccharomycetales	Saccharomycetaceae	Saccharomyces	Saccharomyces cerevisiae	1	0	1	0	1	0	0	1	0	0	0	0	0	0	0	0	0	0	0	0	0	1	0	4	0	0	0	0	0	0	0	0
1176	Eukaryota	Fungi	Ascomycota	Saccharomycetes	Saccharomycetales	Saccharomycetaceae	Lachancea	Lachancea thermotolerans	0	0	1	0	2	0	0	0	2	0	0	0	2	0	0	0	0	0	0	0	1	1	0	0	0	0	1	0	0	1	0	0
1177	Eukaryota	Fungi	Ascomycota	Saccharomycetes	Saccharomycetales	Saccharomycetaceae	Zygosaccharomyces	Zygosaccharomyces rouxii	1	3	0	2	1	0	1	9	0	36	0	0	0	0	0	1	0	2	0	1	6	1	0	1	0	0	4	9	3	3	0	1
1178	Eukaryota	Viridiplantae	Chlorophyta	Chlorophyceae	Oedogoniales	NA	Oedogonium	Oedogonium cardiacum	0	0	0	0	0	0	0	0	0	0	0	0	0	0	0	0	0	0	0	1	1	0	0	0	0	0	0	0	0	0	0	0
1179	Bacteria	NA	Firmicutes	Clostridia	Clostridiales	Clostridiales Family XI. Incertae Sedis	Anaerococcus	Anaerococcus hydrogenalis	1	2	4	4	0	5	4	10	2	2	2	14	0	1	0	13	71	127	34	8	78	125	18	4	9	23	59	5	156	55	23	21
1180	Bacteria	NA	Actinobacteria	Actinobacteria	Bifidobacteriales	Bifidobacteriaceae	Bifidobacterium	Bifidobacterium gallicum	1	4	1	3	1	2	21	5	3	1	1	1	0	1	0	0	0	7	26	0	16	14	11	0	9	0	2	0	3	4	2	0
1181	Bacteria	NA	Proteobacteria	Gammaproteobacteria	Enterobacteriales	Enterobacteriaceae	Dickeya	Dickeya zeae	0	0	1	1	0	0	2	0	0	0	36	1	2	1	0	0	3	3	2	54	6	3	2	5	3	3	6	0	0	0	0	1
1182	Bacteria	NA	Proteobacteria	Gammaproteobacteria	Enterobacteriales	Enterobacteriaceae	Pectobacterium	Pectobacterium carotovorum	2	0	4	1	2	1	5	0	0	3	8	0	1	0	0	0	21	11	6	18	31	5	1	0	0	2	36	1	51	7	2	0
1183	Bacteria	NA	Proteobacteria	Gammaproteobacteria	Enterobacteriales	Enterobacteriaceae	Pectobacterium	Pectobacterium wasabiae	0	1	1	0	4	1	2	0	0	0	6	3	0	1	0	0	5	4	2	11	2	3	2	1	2	3	15	1	12	3	11	2
1184	Eukaryota	Fungi	Basidiomycota	Agaricomycetes	Agaricales	Agaricaceae	Coprinus	Coprinus comatus	0	0	0	0	0	0	0	0	0	0	0	0	57	1	0	0	0	0	1	0	0	0	0	0	0	0	0	151	0	0	0	0
1185	Viruses	NA	NA	NA	Caudovirales	Siphoviridae	NA	Mycobacterium phage Brujita	0	0	0	0	0	0	1	0	0	0	0	0	0	0	0	0	0	0	0	0	0	0	0	0	0	0	0	0	0	0	0	0
1186	Bacteria	NA	Proteobacteria	Alphaproteobacteria	Rickettsiales	Rickettsiaceae	Rickettsia	Rickettsia peacockii	0	0	0	0	0	0	0	1	0	0	0	0	0	1	0	0	0	0	0	0	1	0	0	0	0	0	0	0	0	1	0	0
1187	Bacteria	NA	Firmicutes	Bacilli	Bacillales	Alicyclobacillaceae	Kyrpidia	Kyrpidia tusciae	1	0	0	0	0	0	1	0	2	0	0	3	0	0	0	0	1	1	5	1	1	0	2	0	1	0	1	0	1	2	1	0
1188	Bacteria	NA	Bacteroidetes	Bacteroidia	Bacteroidales	Prevotellaceae	Prevotella	Prevotella oris	16917	5229	9	4726	1964	21309	28612	22758	2774	559	10306	17675	1814	772	1029	1090	13575	13624	167478	4052	121325	46878	60607	13872	7364	25197	26169	515	5284	94591	32441	5981
1189	Bacteria	NA	Actinobacteria	Actinobacteria	Actinomycetales	Micrococcaceae	Rothia	Rothia dentocariosa	251	411294	873	15028	82475	135412	894293	9851	23265	1491	35430	4253	3024	1295	744	6155	1173	17543	5787	25841	5554	2381	1393	15864	10863	42491	1759	862	9730	37073	22010	1091
1190	Bacteria	NA	Firmicutes	Bacilli	Lactobacillales	Streptococcaceae	Streptococcus	Streptococcus sp. M143	6	4876	5742	9166	38029	36003	195639	19740	10775	29575	2120	14843	1948	755	5326	4070	14491	64219	14364	4035	52981	20655	26599	2766	13358	1056	88199	874	69497	8476	20001	3313
1191	Bacteria	NA	Proteobacteria	Betaproteobacteria	Burkholderiales	Comamonadaceae	Comamonas	Comamonas testosteroni	2	5	3	7	4	3	9	10	0	0	10	2	4	8	2	0	3	5	3	6	7	8	5	2	3	1	20	6	1	3	0	3
1192	Viruses	NA	NA	NA	Caudovirales	Siphoviridae	NA	Mycobacterium phage Fruitloop	0	0	0	0	0	0	0	0	0	0	0	0	0	0	0	0	0	1	0	0	0	0	0	0	0	0	0	0	0	0	0	0
1193	Viruses	NA	NA	NA	Caudovirales	Siphoviridae	NA	Mycobacterium phage Pacc40	0	0	0	0	0	0	0	0	0	0	0	0	0	0	0	0	1	0	0	0	0	0	0	0	0	0	0	0	0	0	0	0
1194	Bacteria	NA	Firmicutes	Negativicutes	Selenomonadales	Acidaminococcaceae	Acidaminococcus	Acidaminococcus sp. D21	33	0	0	1	4	1	2	12	1	1	0	8	0	0	0	0	1	5	132	4	22	15	37	0	11	0	5	0	3	36	2	0
1195	Bacteria	NA	Bacteroidetes	Bacteroidia	Bacteroidales	Porphyromonadaceae	Parabacteroides	Parabacteroides sp. D13	6	38	0	81	62	92	195	3938	129	8	110	8	8	21	3	102	100	8	584	8	2468	25	2544	54	7	357	530	29	143	736	19	92
1196	Bacteria	NA	Firmicutes	Bacilli	Lactobacillales	Lactobacillaceae	Pediococcus	Pediococcus acidilactici	0	0	2	0	0	0	0	0	0	0	0	0	0	0	0	0	0	0	0	0	6	0	2	0	0	0	0	0	0	0	0	0
1197	Bacteria	NA	Spirochaetes	Spirochaetia	Spirochaetales	Brachyspiraceae	Brachyspira	Brachyspira hyodysenteriae	0	0	0	0	0	0	0	0	0	0	0	3	0	0	0	0	0	0	1	0	3	1	4	0	0	1	3	0	0	2	1	0
1198	Bacteria	NA	Proteobacteria	Gammaproteobacteria	NA	NA	Luminiphilus	Luminiphilus syltensis	0	0	0	0	1	0	1	1	0	0	0	0	0	0	0	0	0	1	1	0	2	2	0	0	0	0	0	0	0	0	0	0
1199	Bacteria	NA	Proteobacteria	Alphaproteobacteria	Caulobacterales	Caulobacteraceae	Caulobacter	Caulobacter vibrioides	1	0	0	2	0	0	11	2	2	1	2	0	2	9	0	0	3	4	3	20	9	15	3	0	4	2	0	0	9	1	2	7
1200	Bacteria	NA	Firmicutes	Bacilli	Lactobacillales	Enterococcaceae	Enterococcus	Enterococcus faecalis	0	1	0	0	1	3	5	33	2	0	4	73	2	0	137	2	12	39	5	7	719	33	11	3	19	0	50	1	31	280	15	1
1201	Bacteria	NA	Firmicutes	Bacilli	Lactobacillales	Enterococcaceae	Enterococcus	Enterococcus gallinarum	0	0	11	3	2	1	36	82	2	4	4	107	0	1	6	4	10	42	14	17	69	41	9	8	27	1	61	1	68	12	35	1
1202	Bacteria	NA	Firmicutes	Bacilli	Lactobacillales	Enterococcaceae	Enterococcus	Enterococcus casseliflavus	0	0	8	4	4	5	57	80	10	4	2	131	3	0	4	1	51	102	23	31	128	46	19	9	40	2	324	1	84	13	45	1
1203	Bacteria	NA	Firmicutes	Bacilli	Lactobacillales	Enterococcaceae	Enterococcus	Enterococcus faecium	0	1	1	4	2	2	797	33	1	0	3	219	2	0	2	3	12	73	23	19	117	38	62	0	33	2	85	2	88	23	21	2
1204	Bacteria	NA	Proteobacteria	Gammaproteobacteria	NA	NA	NA	gamma proteobacterium NOR5-3	0	0	0	0	0	0	0	0	0	0	0	0	0	0	0	0	0	0	1	0	2	2	2	0	0	0	1	0	1	0	2	0
1205	Bacteria	NA	Actinobacteria	Actinobacteria	Bifidobacteriales	Bifidobacteriaceae	Bifidobacterium	Bifidobacterium catenulatum	36	0	0	0	0	5	15	2	0	3	0	26	1	2	0	1	0	6	20	2	39	5	39	3	16	1	2	0	0	4	2	0
1206	Bacteria	NA	Proteobacteria	Deltaproteobacteria	Syntrophobacterales	Syntrophaceae	Syntrophus	Syntrophus aciditrophicus	1	0	0	0	0	1	2	1	0	0	0	0	0	0	0	1	0	1	4	1	1	0	1	0	0	0	0	0	0	0	2	1
1207	Bacteria	NA	Firmicutes	Bacilli	Lactobacillales	Lactobacillaceae	Lactobacillus	Lactobacillus rhamnosus	3741	0	8	4	3	3	9	64	0	0	2	222	0	0	0	0	6	2	3	1	2	0	1	20	93	2	3	0	3	16	10	0
1208	Bacteria	NA	Firmicutes	Bacilli	Lactobacillales	Streptococcaceae	Streptococcus	Streptococcus suis	9	26	61	135	119	140	672	650	106	3377	23	4821	36	27	95	99	635	1668	604	362	1085	1144	771	384	967	186	2125	18	1365	163	476	88
1209	Bacteria	NA	Tenericutes	Mollicutes	Mycoplasmatales	Mycoplasmataceae	Mycoplasma	Mycoplasma conjunctivae	0	0	0	0	1	0	0	1	0	0	0	0	0	0	0	0	1	0	0	0	1	1	0	0	0	0	1	0	0	0	1	0
1210	Bacteria	NA	Firmicutes	Bacilli	Bacillales	Bacillaceae	Bacillus	Bacillus cereus	0	0	0	0	0	1	5	0	0	0	0	0	0	0	0	0	0	0	0	0	0	0	0	0	0	0	0	0	0	0	0	0
1211	Bacteria	NA	Proteobacteria	Gammaproteobacteria	Enterobacteriales	Enterobacteriaceae	Candidatus Hamiltonella	Candidatus Hamiltonella defensa	0	0	0	3	0	1	3	0	1	0	1	6	2	0	2	2	8	3	1	0	3	0	5	0	0	0	21	0	39	1	7	0
1212	Bacteria	NA	Proteobacteria	Gammaproteobacteria	Chromatiales	Chromatiaceae	Allochromatium	Allochromatium vinosum	0	1	0	1	1	0	3	2	0	0	1	0	0	1	0	1	5	11	4	3	12	9	8	0	6	1	5	2	2	5	0	0
1213	Bacteria	NA	Proteobacteria	Epsilonproteobacteria	Campylobacterales	Campylobacteraceae	Arcobacter	Arcobacter nitrofigilis	0	0	0	0	0	0	2	0	0	1	0	2	0	0	0	0	2	5	2	0	1	1	0	0	0	1	1	0	0	0	0	1
1214	Bacteria	NA	Firmicutes	Clostridia	Clostridiales	Clostridiaceae	Clostridium	Clostridium thermocellum	0	0	0	0	0	2	0	0	1	0	0	0	0	0	0	0	2	1	0	0	1	0	0	1	1	1	1	0	7	0	0	0
1215	Bacteria	NA	Synergistetes	Synergistia	Synergistales	Synergistaceae	Aminobacterium	Aminobacterium colombiense	0	0	0	0	5	2	3	2	0	0	0	0	0	0	0	0	0	0	3	0	13	0	0	0	0	0	0	0	1	1	0	1
1216	Bacteria	NA	Proteobacteria	Betaproteobacteria	Burkholderiales	Comamonadaceae	Acidovorax	Acidovorax delafieldii	200	325	373	334	82	116	213	578	79	99	426	413	136	407	222	94	173	361	113	248	48	178	155	76	168	29	1317	596	254	230	101	126
1217	Archaea	NA	Euryarchaeota	Methanococci	Methanococcales	Methanocaldococcaceae	Methanocaldococcus	Methanocaldococcus infernus	0	0	0	0	0	0	0	0	0	0	0	1	0	0	0	0	0	0	0	0	0	0	0	0	0	0	0	0	0	0	0	0
1218	Archaea	NA	Euryarchaeota	Methanococci	Methanococcales	Methanocaldococcaceae	Methanocaldococcus	Methanocaldococcus fervens	0	0	1	0	0	0	0	0	0	0	0	0	0	0	0	0	0	0	0	0	0	0	0	0	0	0	0	0	0	0	0	0
1219	Bacteria	NA	Proteobacteria	Alphaproteobacteria	Rhizobiales	NA	Candidatus Hodgkinia	Candidatus Hodgkinia cicadicola	0	0	0	0	0	0	0	0	0	0	0	0	0	0	0	0	0	0	0	0	0	0	0	0	0	0	1	0	0	0	0	0
1220	Bacteria	NA	Proteobacteria	Gammaproteobacteria	Enterobacteriales	Enterobacteriaceae	Escherichia	Escherichia coli	0	4532	5	3689	1	12	13	17	827	1	7	0	8	12	3	1747	19	28	710	25	568	34	13	1261	0	21	68	2	7	5	1	3
1221	Bacteria	NA	Actinobacteria	Actinobacteria	Bifidobacteriales	Bifidobacteriaceae	Bifidobacterium	Bifidobacterium animalis	0	4	1	2	2	0	24	2	3	3	1	6	2	0	0	3	18	23	30	10	7	25	13	4	10	8	10	0	2	3	2	0
1222	Bacteria	NA	Proteobacteria	Deltaproteobacteria	Desulfovibrionales	Desulfovibrionaceae	Desulfovibrio	Desulfovibrio magneticus	0	1	0	0	0	2	10	1	2	0	3	1	1	0	0	1	8	4	8	1	10	11	7	0	1	0	1	0	1	11	7	0
1223	Bacteria	NA	Proteobacteria	Gammaproteobacteria	Enterobacteriales	Enterobacteriaceae	Salmonella	Salmonella enterica	0	0	0	0	0	0	1	0	0	0	4	0	0	0	0	0	0	0	1	51	3	0	0	3	0	1	1	0	6	0	0	0
1224	Bacteria	NA	Spirochaetes	Spirochaetia	Spirochaetales	Spirochaetaceae	Spirochaeta	Spirochaeta smaragdinae	0	0	0	0	0	0	1	0	0	0	0	0	0	0	0	0	1	1	1	0	2	0	0	0	0	0	0	0	1	1	0	0
1225	Eukaryota	Fungi	Ascomycota	Saccharomycetes	Saccharomycetales	NA	Candida	Candida dubliniensis	414	0	895	1	1	3	1448	3301	1	0	1	1754	0	1	1	0	0	0	15	1	2	12	1	0	486	369	27	3	0	3	0	0
1226	Bacteria	NA	Firmicutes	Clostridia	Halanaerobiales	Halobacteroidaceae	Acetohalobium	Acetohalobium arabaticum	0	0	0	0	0	0	0	0	0	0	0	2	0	0	0	0	1	4	4	0	5	2	1	0	0	0	7	0	0	2	1	0
1227	Bacteria	NA	Firmicutes	Bacilli	Lactobacillales	Streptococcaceae	Streptococcus	Streptococcus pneumoniae	23	223	2175	4247	4454	5256	29349	2027	2317	23450	743	1439	349	68	1691	1818	7962	4394	3387	1262	10937	2480	6335	247	1007	12536	8755	186	6705	2408	2428	652
1228	Bacteria	NA	Proteobacteria	Gammaproteobacteria	Pseudomonadales	Moraxellaceae	Acinetobacter	Acinetobacter pittii	7	12	0	25	3	3	4	21	20	11	2871	5	0	4	3	4	15	16	0	7577	3	2	2	339	3	1241	40	15	15	5	3	10
1229	Bacteria	NA	Proteobacteria	Gammaproteobacteria	Pseudomonadales	Moraxellaceae	Acinetobacter	Acinetobacter baumannii	0	2	0	1	0	0	0	0	1	0	19	1	0	1	0	1	1	2	0	28	2	1	0	3	0	10	0	1	6	1	0	1
1230	Bacteria	NA	Proteobacteria	Gammaproteobacteria	Pseudomonadales	Moraxellaceae	Acinetobacter	Acinetobacter calcoaceticus	0	1	0	0	0	0	0	1	0	0	16	1	0	1	0	1	2	4	1	48	1	1	0	4	0	4	4	0	23	0	1	0
1231	Bacteria	NA	Proteobacteria	Gammaproteobacteria	Pseudomonadales	Moraxellaceae	Acinetobacter	Acinetobacter johnsonii	5	103	21	94	21	74	11	94	166	68	1443	21	10	118	25	14	254	648	32	5395	30	25	12	234	118	662	129	206	163	245	268	328
1232	Bacteria	NA	Proteobacteria	Gammaproteobacteria	Pseudomonadales	Moraxellaceae	Acinetobacter	Acinetobacter junii	0	36	16	34	8	2	7	39	14	17	69	11	8	9	9	6	24	51	13	169	25	17	10	18	15	24	51	35	36	53	9	24
1233	Bacteria	NA	Proteobacteria	Gammaproteobacteria	Pseudomonadales	Moraxellaceae	Acinetobacter	Acinetobacter lwoffii	9	59	5	84	7	37	14	68	32	48	215	28	6	6	27	9	24	35	5	610	12	11	7	20	7	53	70	29	37	26	18	114
1234	Bacteria	NA	Proteobacteria	Gammaproteobacteria	Pseudomonadales	Moraxellaceae	Acinetobacter	Acinetobacter radioresistens	2	18	6	13	2	2	15	24	5	2	42	9	33	72	17	14	22	24	3	122	7	16	14	10	12	13	60	56	26	29	36	17
1235	Bacteria	NA	Bacteroidetes	NA	NA	NA	NA	Bacteroidetes oral taxon 274	4024	6047	2	2283	1535	6374	2225	2619	7524	257	3568	51	477	133	26	149	725	1398	15943	1032	5348	1046	2560	972	3255	1740	4888	144	783	3030	1658	266
1236	Bacteria	NA	Firmicutes	Bacilli	Lactobacillales	Lactobacillaceae	Lactobacillus	Lactobacillus coleohominis	303	1	0	1	0	0	6	5	3	0	0	11	0	0	0	1	2	2	0	2	1	3	0	5	7	35	2	0	2	1	1	0
1237	Bacteria	NA	Firmicutes	Bacilli	Lactobacillales	Lactobacillaceae	Lactobacillus	Lactobacillus crispatus	3530	0	0	1	0	0	13	35	2	0	3	132	0	0	0	0	0	3	0	0	11	4	2	100	0	37	5	3	0	1	0	0
1238	Bacteria	NA	Firmicutes	Bacilli	Lactobacillales	Lactobacillaceae	Lactobacillus	Lactobacillus crispatus	331	0	0	0	0	0	0	3	1	0	1	2	0	1	0	0	0	0	0	0	0	0	0	13	0	2	2	0	0	0	0	0
1239	Bacteria	NA	Firmicutes	Bacilli	Lactobacillales	Lactobacillaceae	Lactobacillus	Lactobacillus fermentum	261	0	1	0	0	0	14	24	0	0	0	5	0	0	0	0	0	0	4	7	0	2	1	11	2	1	2	0	4	1	0	0
1240	Bacteria	NA	Firmicutes	Bacilli	Lactobacillales	Lactobacillaceae	Lactobacillus	Lactobacillus jensenii	0	0	0	0	0	0	0	0	0	0	0	0	0	0	0	0	0	1	0	0	0	0	0	0	0	0	0	0	0	0	0	0
1241	Bacteria	NA	Firmicutes	Bacilli	Lactobacillales	Lactobacillaceae	Lactobacillus	Lactobacillus jensenii	115	0	0	1	0	0	2	1	0	0	0	1	0	0	0	0	0	1	8	1	0	0	1	0	1	0	1	0	1	0	0	1
1242	Bacteria	NA	Firmicutes	Clostridia	Clostridiales	Clostridiales Family XI. Incertae Sedis	Peptoniphilus	Peptoniphilus sp. oral taxon 386	14	72	5	89	354	587	212	249	201	76	49	1116	44	6	33	139	1399	2365	2525	587	3160	8485	9499	546	496	860	2552	75	4189	1816	2945	1329
1243	Bacteria	NA	Bacteroidetes	Bacteroidia	Bacteroidales	Prevotellaceae	Prevotella	Prevotella buccae	1618	886	2	2262	1749	4294	2874	3365	1012	583	296	23444	180	283	416	363	7332	14420	114134	1463	76500	27593	27058	3029	1461	6265	16566	255	8197	41121	8149	4354
1244	Bacteria	NA	Bacteroidetes	Bacteroidia	Bacteroidales	Prevotellaceae	Prevotella	Prevotella melaninogenica	461	1943	40	15177	5672	3575	8687	24970	3044	294	408	74293	882	3650	3784	1268	37897	175893	632062	4749	334307	284224	287779	18860	22814	41272	222033	2409	147571	233166	130602	12768
1245	Bacteria	NA	Bacteroidetes	Bacteroidia	Bacteroidales	Prevotellaceae	Prevotella	Prevotella sp. oral taxon 317	2421	3643	2	1331	7413	14151	4509	1207	3018	190	222	7124	3281	216	286	835	20840	6655	59130	1545	25381	9266	15620	1491	1759	7875	51492	436	10863	16876	11151	6006
1246	Bacteria	NA	Proteobacteria	Gammaproteobacteria	Vibrionales	Vibrionaceae	Vibrio	Vibrio splendidus	0	0	1	0	0	0	1	1	0	0	0	23	1	0	0	0	40	1	3	1	7	0	0	0	0	0	16	0	67	6	6	3
1247	Eukaryota	NA	NA	Heterolobosea	Schizopyrenida	Vahlkampfiidae	Naegleria	Naegleria gruberi	0	1	0	0	0	0	1	0	1	0	0	0	0	0	0	0	0	0	0	0	0	0	0	0	0	0	0	0	0	0	0	0
1248	Archaea	NA	Euryarchaeota	Methanococci	Methanococcales	Methanocaldococcaceae	Methanocaldococcus	Methanocaldococcus vulcanius	0	0	0	0	0	0	0	0	0	0	0	0	0	0	0	0	0	1	0	0	0	0	0	1	0	0	1	0	0	0	0	0
1249	Bacteria	NA	Actinobacteria	Actinobacteria	Bifidobacteriales	Bifidobacteriaceae	Bifidobacterium	Bifidobacterium animalis	3	0	0	0	0	11	0	0	0	0	0	0	0	0	0	0	0	0	0	0	0	0	0	0	0	0	0	0	0	0	0	0
1250	Bacteria	NA	Firmicutes	Clostridia	Thermoanaerobacterales	Thermoanaerobacteraceae	Thermoanaerobacter	Thermoanaerobacter italicus	0	0	0	0	0	0	1	0	0	0	0	1	0	0	0	0	0	0	0	0	0	1	2	0	0	0	5	0	0	3	1	0
1251	Bacteria	NA	Proteobacteria	Betaproteobacteria	Gallionellales	Gallionellaceae	Sideroxydans	Sideroxydans lithotrophicus	1	0	0	0	0	1	3	2	0	0	2	0	0	4	0	0	1	0	2	1	6	1	1	0	1	0	2	0	1	0	2	1
1252	Bacteria	NA	Proteobacteria	Gammaproteobacteria	Alteromonadales	Moritellaceae	Moritella	Moritella sp. PE36	0	0	1	1	1	1	6	0	1	0	0	3	0	0	0	0	23	8	6	1	15	1	2	0	1	0	26	0	50	5	3	2
1253	Bacteria	NA	Proteobacteria	Alphaproteobacteria	Rhodobacterales	Hyphomonadaceae	Hirschia	Hirschia baltica	0	0	0	0	0	0	0	0	0	0	0	1	0	0	0	0	0	0	0	0	1	0	0	0	0	0	2	0	1	0	0	0
1254	Bacteria	NA	Proteobacteria	Betaproteobacteria	Methylophilales	Methylophilaceae	Methylovorus	Methylovorus glucosotrophus	0	0	1	0	0	0	1	0	0	0	0	1	0	0	0	0	2	0	4	1	3	1	0	0	1	0	8	0	1	0	0	0
1255	Bacteria	NA	Proteobacteria	Alphaproteobacteria	Rhizobiales	Hyphomicrobiaceae	Hyphomicrobium	Hyphomicrobium denitrificans	0	0	0	1	0	2	2	0	1	0	1	3	0	1	0	0	2	2	7	2	4	1	1	0	0	3	5	3	1	3	1	1
1256	Bacteria	NA	Proteobacteria	Betaproteobacteria	Methylophilales	Methylophilaceae	Methylotenera	Methylotenera mobilis	0	0	0	0	0	1	2	0	0	0	0	1	0	0	0	0	11	0	1	0	8	2	0	0	0	0	0	0	4	2	0	0
1257	Bacteria	NA	Verrucomicrobia	Opitutae	Puniceicoccales	Puniceicoccaceae	Coraliomargarita	Coraliomargarita akajimensis	0	1	0	0	0	1	1	0	0	0	0	2	0	1	1	0	3	21	2	0	15	0	3	0	5	0	37	1	19	1	3	5
1258	Bacteria	NA	Firmicutes	Clostridia	Thermoanaerobacterales	Thermoanaerobacteraceae	Thermoanaerobacter	Thermoanaerobacter mathranii	0	0	0	0	0	0	0	0	0	0	0	0	0	0	0	0	0	1	2	1	0	3	0	0	0	0	1	0	0	0	0	0
1259	Bacteria	NA	Proteobacteria	Gammaproteobacteria	Enterobacteriales	Enterobacteriaceae	Escherichia	Escherichia fergusonii	27	2	27	1	15	4	4	10	10	4	82	8	1	1	25	64	286	17	4	179	985	0	40	3	2	13	79	8	39	0	570	330
1260	Eukaryota	NA	Apicomplexa	Aconoidasida	Haemosporida	NA	Plasmodium	Plasmodium knowlesi	0	5	2	6	2	1	2	1	0	1	0	2	0	1	0	0	0	0	0	0	2	0	0	0	0	0	1	0	0	0	0	0
1261	Bacteria	NA	Firmicutes	Bacilli	Bacillales	Staphylococcaceae	Staphylococcus	Staphylococcus aureus	0	0	0	0	0	0	0	1	0	0	0	0	0	0	0	0	0	0	0	0	0	0	0	0	0	0	0	0	0	0	0	0
1262	Bacteria	NA	Firmicutes	Bacilli	Bacillales	Staphylococcaceae	Staphylococcus	Staphylococcus aureus	0	0	0	0	0	0	0	0	0	0	0	0	5	1	0	0	1	1	0	0	4	0	0	0	0	0	2	0	5	0	0	0
1263	Bacteria	NA	Firmicutes	Bacilli	Bacillales	Staphylococcaceae	Staphylococcus	Staphylococcus aureus	0	0	0	0	0	0	0	0	0	0	1	0	0	0	0	0	0	0	0	0	0	0	0	0	0	0	0	0	0	0	0	0
1264	Bacteria	NA	Actinobacteria	Actinobacteria	Actinomycetales	Actinomycetaceae	Mobiluncus	Mobiluncus curtisii	1	33	3	20	42	38	230	59	43	4	6	1	0	21	6	0	34	256	205	16	722	229	645	10	334	170	0	4	153	1	49	2
1265	Bacteria	NA	Firmicutes	Bacilli	Lactobacillales	Lactobacillaceae	Lactobacillus	Lactobacillus helveticus	3107	0	6	3	1	3	35	76	6	1	2	185	0	0	0	0	60	10	80	3	12	96	5	229	19	37	17	6	7	21	2	2
1266	Bacteria	NA	Firmicutes	Bacilli	Lactobacillales	Lactobacillaceae	Lactobacillus	Lactobacillus amylolyticus	216	0	0	0	0	1	4	15	2	0	0	21	0	0	0	0	2	5	8	1	6	41	0	30	1	5	8	1	5	4	3	0
1267	Bacteria	NA	Actinobacteria	Actinobacteria	Actinomycetales	Brevibacteriaceae	Brevibacterium	Brevibacterium mcbrellneri	1	3	0	1	1	6	34	2	77	1	0	4	1	3	0	1	6	39	85	8	22	26	55	2	36	1	7	0	0	16	14	0
1268	Bacteria	NA	Bacteroidetes	Bacteroidia	Bacteroidales	Bacteroidaceae	Bacteroides	Bacteroides sp. D20	1	3	0	3	25	5	10	3	1	2	0	6	3	118	2	7	38	111	303	3	294	100	127	11	1	29	205	2	129	19	62	20
1269	Bacteria	NA	Bacteroidetes	Bacteroidia	Bacteroidales	Bacteroidaceae	Bacteroides	Bacteroides sp. D22	0	4	0	9	7	44	14	160	1	0	1	1	3	14	1	9	27	853	2904	3	117	37	190	45	5	7	604	1	42	2620	65	38
1270	Bacteria	NA	Firmicutes	Bacilli	Lactobacillales	Leuconostocaceae	Leuconostoc	Leuconostoc mesenteroides	2	0	2	1	1	1	3	106	0	0	8	5	0	2	0	0	0	2	7	18	7	11	6	2	4	1	25	0	2	9	1	0
1271	Bacteria	NA	Firmicutes	Clostridia	Thermoanaerobacterales	Thermoanaerobacteraceae	Thermoanaerobacter	Thermoanaerobacter sp. X561	0	0	0	0	0	0	0	0	0	0	0	0	0	0	0	0	0	0	0	2	0	0	0	0	0	0	0	0	0	0	0	0
1272	Bacteria	NA	Firmicutes	Clostridia	Thermoanaerobacterales	Thermoanaerobacteraceae	Thermoanaerobacter	Thermoanaerobacter ethanolicus	0	0	0	0	0	0	0	1	0	0	0	0	0	0	0	0	0	0	1	0	0	0	0	0	0	0	0	0	0	0	0	0
1273	Bacteria	NA	Proteobacteria	Deltaproteobacteria	Desulfobacterales	Desulfobulbaceae	Desulfurivibrio	Desulfurivibrio alkaliphilus	6	0	1	0	1	1	0	1	1	0	0	0	0	0	0	1	1	0	0	0	3	0	2	0	1	0	0	0	0	0	0	0
1274	Archaea	NA	Euryarchaeota	Archaeoglobi	Archaeoglobales	Archaeoglobaceae	Ferroglobus	Ferroglobus placidus	0	0	0	0	0	0	0	0	0	0	0	0	0	0	0	0	0	1	1	0	0	1	1	0	0	0	1	1	0	0	0	0
1275	Bacteria	NA	Proteobacteria	Gammaproteobacteria	Enterobacteriales	Enterobacteriaceae	Dickeya	Dickeya dadantii	0	0	1	0	1	0	0	2	0	0	7	1	1	0	0	1	7	2	4	22	4	0	0	1	0	0	7	2	20	5	3	0
1276	Bacteria	NA	Firmicutes	Negativicutes	Selenomonadales	Acidaminococcaceae	Acidaminococcus	Acidaminococcus fermentans	7	1	0	4	1	6	20	13	2	0	0	30	1	0	0	0	1	32	1484	0	149	55	109	6	11	0	3	0	9	38	27	2
1277	Archaea	NA	Crenarchaeota	Thermoprotei	Desulfurococcales	Desulfurococcaceae	Staphylothermus	Staphylothermus hellenicus	0	0	0	0	0	1	0	0	0	0	0	0	0	0	0	0	0	0	0	0	0	0	0	0	0	0	0	0	0	0	0	0
1278	Bacteria	NA	Proteobacteria	Gammaproteobacteria	Enterobacteriales	Enterobacteriaceae	Shigella	Shigella flexneri	19	91	47	47	14	13	41	64	41	28	38	8	10	28	17	4	56	65	28	82	4	7	23	5	33	32	214	46	17	51	33	32
1279	Viruses	NA	NA	NA	Caudovirales	Siphoviridae	NA	Mycobacterium phage Phlyer	0	0	0	0	0	0	0	0	0	0	0	0	0	0	0	0	0	0	0	0	0	1	0	0	0	0	0	0	0	0	0	0
1280	Bacteria	NA	Proteobacteria	Gammaproteobacteria	Legionellales	Coxiellaceae	Rickettsiella	Rickettsiella grylli	0	0	1	1	0	0	1	1	0	0	0	0	0	0	0	0	0	1	0	0	2	0	1	1	0	0	2	0	2	0	0	0
1281	Bacteria	NA	Synergistetes	Synergistia	Synergistales	Synergistaceae	Anaerobaculum	Anaerobaculum hydrogeniformans	0	0	0	0	0	2	0	0	0	0	0	0	0	2	1	0	1	0	10	0	4	3	0	0	0	0	0	0	0	1	0	1
1282	Bacteria	NA	Firmicutes	Bacilli	Bacillales	Bacillaceae	Bacillus	Bacillus megaterium	4	0	0	0	0	0	54	15	0	0	1	36	0	0	0	0	25	1	0	0	1	24	2	0	1	0	19	0	73	0	8	1
1283	Bacteria	NA	Firmicutes	Clostridia	Clostridiales	Clostridiaceae	Clostridium	Clostridium botulinum	0	0	0	0	0	0	3	5	0	1	0	4	0	0	0	1	10	5	36	1	27	6	3	1	1	1	6	0	11	3	3	2
1284	Bacteria	NA	Proteobacteria	Gammaproteobacteria	Enterobacteriales	Enterobacteriaceae	Buchnera	Buchnera aphidicola	0	0	0	0	0	0	0	0	0	0	0	0	0	0	0	0	0	0	1	0	3	0	0	0	0	0	0	0	3	0	0	0
1285	Bacteria	NA	Proteobacteria	Gammaproteobacteria	Vibrionales	Vibrionaceae	Vibrio	Vibrio cholerae	0	0	8	0	0	0	3	0	2	0	2	10	0	0	1	4	0	44	2	2	44	1	4	0	3	0	0	0	5	2	0	7
1286	Bacteria	NA	Fibrobacteres	Fibrobacteria	Fibrobacterales	Fibrobacteraceae	Fibrobacter	Fibrobacter succinogenes	0	0	0	0	0	0	2	1	0	0	0	0	0	0	1	2	1	20	28	0	31	2	10	1	2	2	21	1	20	3	2	3
1287	Viruses	NA	NA	NA	Caudovirales	Siphoviridae	NA	Staphylococcus phage 53 sensu lato	0	0	0	0	0	0	0	0	0	0	0	0	0	0	0	0	0	0	0	0	0	0	0	4	0	0	0	0	0	0	0	0
1288	Bacteria	NA	Proteobacteria	Gammaproteobacteria	Aeromonadales	Aeromonadaceae	Tolumonas	Tolumonas auensis	1	0	1	2	1	2	0	4	0	2	16	10	0	0	2	2	6	17	16	34	26	9	1	0	0	2	53	0	40	8	11	6
1289	Bacteria	NA	Proteobacteria	Alphaproteobacteria	Rhizobiales	Brucellaceae	Brucella	Brucella ceti	0	1	1	0	0	0	0	2	0	0	1	0	0	0	0	0	1	0	0	2	0	0	8	0	0	0	0	0	0	0	0	0
1290	Bacteria	NA	Bacteroidetes	Flavobacteriia	Flavobacteriales	NA	Candidatus Sulcia	Candidatus Sulcia muelleri	0	0	0	0	0	0	0	0	0	0	0	0	0	0	0	0	0	0	0	0	1	0	4	0	0	0	0	0	0	0	0	0
1291	Bacteria	NA	Actinobacteria	Actinobacteria	Actinomycetales	Micrococcaceae	Micrococcus	Micrococcus luteus	4	22	6	19	4	22	144	49	19	6	32	106	0	12	3	0	14	34	20	35	15	50	33	12	83	19	11	4	7	18	8	4
1292	Bacteria	NA	Firmicutes	Bacilli	Bacillales	Staphylococcaceae	Staphylococcus	Staphylococcus epidermidis	3	5	3	4	0	2	0	10	0	0	5	5	7	15	2	3	0	6	0	8	1	3	3	1	2	3	17	8	6	2	3	1
1293	Bacteria	NA	Proteobacteria	Gammaproteobacteria	Pseudomonadales	Moraxellaceae	Acinetobacter	Acinetobacter radioresistens	0	0	1	3	1	0	1	2	0	0	5	0	3	4	1	1	0	1	1	30	0	0	1	2	1	0	1	2	2	1	5	5
1294	Bacteria	NA	Firmicutes	Bacilli	Bacillales	Staphylococcaceae	Staphylococcus	Staphylococcus warneri	2	4	10	4	4	35	3	38	3	2	3	44	2	13	0	2	10	51	8	6	56	50	25	9	23	0	31	71	38	6	14	6
1295	Bacteria	NA	Proteobacteria	Betaproteobacteria	Neisseriales	Neisseriaceae	Neisseria	Neisseria flavescens	1	140	11628	85	516	95	26452	1384	65	1071	17	1146	41476	2400	11054	106719	573812	25503	10745	7	874351	1047	2045	741	1	40	543645	938	203657	990	48	31509
1296	Bacteria	NA	Firmicutes	Bacilli	Lactobacillales	Streptococcaceae	Streptococcus	Streptococcus salivarius	1476	1193	26262	17925	9163	48298	29269	255409	10555	26662	2758	2047830	1381	641	3600	1203	135311	75765	89866	22644	76138	362708	66054	154647	186886	42716	345662	679	114468	52230	36612	2043
1297	Bacteria	NA	Fusobacteria	Fusobacteriia	Fusobacteriales	Leptotrichiaceae	Leptotrichia	Leptotrichia goodfellowii	1	69	66	11	74	372	51	275	190	4	286	39	9	9	6	63	1868	7765	1627	107	1113	5894	4112	29	45	1	3606	77	1204	2327	1664	980
1298	Bacteria	NA	Spirochaetes	Spirochaetia	Spirochaetales	Spirochaetaceae	Treponema	Treponema vincentii	1268	993	1	202	1838	564	3396	197	525	190	3	2229	692	103	57	692	30	12	3903	155	4477	20	134	1204	165	40	1243	44	2900	1701	503	2346
1299	Bacteria	NA	Firmicutes	Bacilli	Lactobacillales	Lactobacillaceae	Lactobacillus	Lactobacillus jensenii	1203	1	0	1	0	0	5	10	1	1	1	21	0	0	0	0	3	9	9	2	12	7	11	20	4	11	11	0	6	3	3	1
1300	Bacteria	NA	Bacteroidetes	Bacteroidia	Bacteroidales	Porphyromonadaceae	Porphyromonas	Porphyromonas uenonis	8	7	16	13	74	30	77	27	444	27	4	42	112	4	69	95	745	2206	830	9	669	303	285	262	7	8663	5051	11	2470	365	71	144
1301	Bacteria	NA	Actinobacteria	Actinobacteria	Actinomycetales	Actinomycetaceae	Mobiluncus	Mobiluncus mulieris	0	1	0	0	0	4	3	2	2	0	0	0	0	1	0	0	0	13	8	2	8	9	50	0	10	0	0	0	0	2	3	2
1302	Bacteria	NA	Firmicutes	Clostridia	Clostridiales	Peptostreptococcaceae	Peptostreptococcus	Peptostreptococcus anaerobius	0	19	3	66	203	379	144	115	64	123	7	451	19	16	14	103	2302	1805	2843	97	1687	8521	3308	251	293	476	2445	72	2037	511	1423	563
1303	Bacteria	NA	Firmicutes	Clostridia	Clostridiales	Clostridiales Family XI. Incertae Sedis	Peptoniphilus	Peptoniphilus lacrimalis	3	3	12	10	17	32	47	88	25	2	1	1502	3	0	0	7	144	118	400	176	797	693	273	349	111	7104	320	13	987	310	149	108
1304	Bacteria	NA	Tenericutes	Mollicutes	Acholeplasmatales	Acholeplasmataceae	Candidatus Phytoplasma	Candidatus Phytoplasma australiense	0	0	0	0	0	0	0	0	0	0	0	0	0	0	0	0	0	0	0	0	0	0	0	0	0	0	1	0	1	0	0	0
1305	Bacteria	NA	Proteobacteria	Epsilonproteobacteria	Nautiliales	Nautiliaceae	Nautilia	Nautilia profundicola	0	0	0	0	0	0	1	0	0	0	0	2	0	0	0	0	3	2	4	0	4	0	0	0	0	0	1	0	0	2	0	0
1306	Bacteria	NA	Cyanobacteria	NA	Prochlorales	Prochlorococcaceae	Prochlorococcus	Prochlorococcus marinus	0	0	0	0	0	0	0	0	0	0	0	2	0	0	1	0	0	0	0	0	1	0	2	0	0	0	0	0	0	0	0	0
1307	Bacteria	NA	Cyanobacteria	NA	Prochlorales	Prochlorococcaceae	Prochlorococcus	Prochlorococcus marinus	0	0	0	0	0	0	0	0	0	0	1	0	0	0	0	0	0	0	0	0	0	0	2	0	0	0	0	1	0	1	0	0
1308	Bacteria	NA	Bacteroidetes	Flavobacteriia	Flavobacteriales	Blattabacteriaceae	Blattabacterium	Blattabacterium sp. (Periplaneta americana)	0	0	0	0	0	0	0	0	0	1	0	0	0	0	0	0	1	0	1	0	1	1	0	0	0	2	0	0	1	0	2	0
1309	Bacteria	NA	Proteobacteria	Betaproteobacteria	Neisseriales	Neisseriaceae	Neisseria	Neisseria meningitidis	1	2	97	85	44	300	8993	215	12	2	11	13	9918	21	4119	16550	5464	332	195	4	9808	278	13	54	2	2	20176	2196	9945	155	46	329
1310	Bacteria	NA	Proteobacteria	Gammaproteobacteria	Alteromonadales	Shewanellaceae	Shewanella	Shewanella sp. MR-7	0	0	0	0	0	1	6	1	0	1	2	8	2	0	1	1	10	7	3	27	8	1	1	1	2	1	16	3	27	13	1	1
1311	Bacteria	NA	Firmicutes	Clostridia	Clostridiales	Lachnospiraceae	Oribacterium	Oribacterium sp. oral taxon 078	647	1070	49	271	500	3871	7951	3957	1306	46	1498	5051	188	129	114	277	2923	2377	6205	363	3912	6108	2652	477	1485	1905	4600	36	2320	3761	2422	309
1312	Bacteria	NA	Aquificae	Aquificae	Aquificales	Aquificaceae	Hydrogenobacter	Hydrogenobacter thermophilus	0	0	0	0	0	0	0	0	0	0	0	0	0	0	0	0	0	0	0	0	0	1	0	0	0	0	0	0	0	0	0	0
1313	Bacteria	NA	Firmicutes	Clostridia	Clostridiales	Clostridiaceae	Clostridium	Clostridium saccharolyticum	6	26	1	40	20	105	127	174	54	0	46	4675	19	190	9	4	634	610	4021	13	1562	2420	4817	106	193	114	199	6	2442	682	470	403
1314	Bacteria	NA	Firmicutes	Bacilli	Bacillales	Paenibacillaceae	Paenibacillus	Paenibacillus sp. oral taxon 786	3	0	2	0	0	1	3	0	0	0	2	4	0	0	0	1	2	3	4	2	2	3	4	1	1	0	4	0	1	8	2	3
1315	Bacteria	NA	Firmicutes	Clostridia	Clostridiales	Lachnospiraceae	Roseburia	Roseburia inulinivorans	14	33	9	35	8	71	56	80	40	7	9	151	11	41	11	10	313	183	682	30	403	1231	1214	35	132	35	258	5	296	306	76	25
1316	Bacteria	NA	Proteobacteria	Alphaproteobacteria	Sphingomonadales	Sphingomonadaceae	Zymomonas	Zymomonas mobilis	2	14	6	10	0	0	1	61	4	3	37	3	0	4	1	0	0	17	0	55	0	1	2	10	2	3	1	4	0	1	3	2
1317	Bacteria	NA	Proteobacteria	Betaproteobacteria	Rhodocyclales	Rhodocyclaceae	Azoarcus	Azoarcus sp. BH72	2	3	4	2	1	0	22	2	1	0	7	0	1	7	0	0	3	9	2	5	9	11	6	4	2	2	3	1	4	0	3	0
1318	Bacteria	NA	Firmicutes	Bacilli	Bacillales	Staphylococcaceae	Staphylococcus	Staphylococcus hominis	2	1	10	5	1	3	7	24	5	1	2	34	13	8	2	0	11	89	17	12	25	21	13	25	15	12	28	20	27	26	15	12
1319	Bacteria	NA	Proteobacteria	Gammaproteobacteria	Pseudomonadales	Moraxellaceae	Acinetobacter	Acinetobacter sp. ADP1	0	0	0	0	1	1	2	1	1	0	4	0	0	0	0	2	15	7	4	15	19	6	1	9	1	4	9	1	24	0	0	5
1320	Bacteria	NA	Firmicutes	Bacilli	Lactobacillales	Lactobacillaceae	Lactobacillus	Lactobacillus gasseri	169	0	0	3	0	1	5	10	0	0	1	14	0	0	0	0	1	3	0	0	0	2	0	53	3	50	0	1	0	5	2	0
1321	Viruses	NA	NA	NA	Caudovirales	Siphoviridae	NA	Lactococcus phage 936 sensu lato	0	0	0	0	0	0	0	0	0	0	0	0	0	0	0	0	1	0	0	0	0	4	0	0	0	0	1	0	1	0	0	0
1322	Bacteria	NA	Firmicutes	Clostridia	Clostridiales	Clostridiaceae	Clostridium	Clostridium butyricum	0	0	1	0	1	1	2	1	0	0	0	6	0	0	1	0	24	23	18	1	16	5	5	1	1	0	18	0	13	15	5	1
1323	Bacteria	NA	Actinobacteria	Actinobacteria	Actinomycetales	Nocardiaceae	Rhodococcus	Rhodococcus opacus	3	14	1	5	2	16	139	6	17	0	2	9	1	3	0	1	20	16	19	3	11	21	17	5	16	2	22	3	0	35	4	0
1324	Bacteria	NA	Proteobacteria	Alphaproteobacteria	Rhodobacterales	Rhodobacteraceae	Thalassobium	Thalassobium sp. R2A62	0	0	1	0	0	0	1	1	0	0	1	0	0	0	0	0	0	0	1	0	2	0	0	0	0	0	3	0	0	0	0	0
1325	Viruses	NA	NA	NA	Caudovirales	Siphoviridae	NA	Streptococcus phage Abc2	4	0	8	11	16	4	4	0	7	0	0	41	1	1	0	0	1	0	1	4	15	38	5	40	74	0	512	0	0	5	1	1
1326	Bacteria	NA	Chloroflexi	Dehalococcoidia	Dehalococcoidales	Dehalococcoidaceae	Dehalococcoides	Dehalococcoides mccartyi	0	0	0	0	1	0	0	0	0	0	0	0	0	0	0	0	0	0	0	0	0	0	0	0	0	0	0	0	0	0	0	0
1327	Bacteria	NA	Actinobacteria	Actinobacteria	Coriobacteriales	Coriobacteriaceae	Olsenella	Olsenella uli	1032	35	0	57	105	934	623	85	80	20	0	33	11	12	2	44	47	55	1084	140	939	1282	330	692	222	134	54	18	12	754	572	77
1328	Bacteria	NA	Proteobacteria	Alphaproteobacteria	Caulobacterales	Caulobacteraceae	Brevundimonas	Brevundimonas subvibrioides	0	3	7	2	0	3	10	0	3	0	12	2	0	8	2	0	1	1	10	8	4	2	3	5	9	2	3	2	7	2	2	0
1329	Bacteria	NA	Firmicutes	Bacilli	Lactobacillales	Lactobacillaceae	Lactobacillus	Lactobacillus johnsonii	171	1	1	4	0	0	9	6	2	2	0	11	0	0	0	1	1	10	5	2	6	6	18	7	11	17	51	4	12	3	3	0
1330	Bacteria	NA	Proteobacteria	Gammaproteobacteria	Pasteurellales	Pasteurellaceae	Aggregatibacter	Aggregatibacter aphrophilus	0	239	2350	1462	12211	1468	13347	88	903	120	62	6048	2812	409	2084	6575	65794	18341	18076	1085	97885	2322	4513	115	565	150	64422	19541	83711	5693	10730	6511
1331	Bacteria	NA	Proteobacteria	Alphaproteobacteria	Rhodospirillales	Acetobacteraceae	Acetobacter	Acetobacter pasteurianus	6	8	89	17	1	3	3	13	4	6	153	16	12	66	10	0	15	59	4	326	1	5	13	16	38	20	49	37	6	13	7	4
1332	Archaea	NA	Euryarchaeota	Methanobacteria	Methanobacteriales	Methanobacteriaceae	Methanobrevibacter	Methanobrevibacter ruminantium	0	0	0	0	0	0	0	1	0	0	0	0	0	0	0	0	0	0	0	0	0	0	0	0	0	0	0	0	0	0	0	0
1333	Bacteria	NA	Proteobacteria	Gammaproteobacteria	Enterobacteriales	Enterobacteriaceae	Erwinia	Erwinia pyrifoliae	0	0	0	1	0	1	2	2	1	0	10	6	0	0	0	0	2	0	4	15	21	2	0	4	0	1	3	1	3	1	0	0
1334	Bacteria	NA	Proteobacteria	Gammaproteobacteria	Enterobacteriales	Enterobacteriaceae	Erwinia	Erwinia billingiae	1	1	2	2	1	0	3	0	0	0	34	2	0	0	0	0	4	5	3	108	5	0	2	2	6	3	3	3	6	4	4	2
1335	Bacteria	NA	Proteobacteria	Alphaproteobacteria	Rhizobiales	Bartonellaceae	Bartonella	Bartonella grahamii	0	0	0	0	0	0	0	0	0	0	0	0	0	0	0	0	1	1	0	0	2	0	0	0	0	0	0	0	0	0	0	0
1336	Bacteria	NA	Firmicutes	Clostridia	Clostridiales	Peptococcaceae	Thermincola	Thermincola potens	0	0	0	0	1	2	0	2	1	0	0	23	0	1	0	0	3	0	11	1	7	8	16	0	0	1	6	0	4	6	2	0
1337	Bacteria	NA	Cyanobacteria	NA	Nostocales	Nostocaceae	Nostoc	Nostoc punctiforme	0	3	2	0	0	0	0	0	1	0	0	0	0	0	0	0	0	1	1	0	0	3	1	0	0	2	0	0	1	1	0	0
1338	Bacteria	NA	Firmicutes	Bacilli	Bacillales	Bacillaceae	Bacillus	Bacillus cereus	0	0	0	0	0	0	0	0	0	0	0	0	0	0	1	0	0	0	0	0	0	0	1	0	0	0	0	0	0	0	0	0
1339	Bacteria	NA	Firmicutes	Bacilli	Bacillales	Listeriaceae	Listeria	Listeria monocytogenes	0	0	0	0	2	0	0	40	5	0	1	25	0	0	0	0	1	7	43	0	0	11	0	2	45	0	0	0	0	0	47	0
1340	Bacteria	NA	Proteobacteria	Gammaproteobacteria	Enterobacteriales	Enterobacteriaceae	Yersinia	Yersinia pestis	0	0	0	0	0	1	0	0	0	0	5	0	0	0	0	0	0	0	0	0	0	0	1	0	0	1	0	0	0	0	0	0
1341	Bacteria	NA	Proteobacteria	Gammaproteobacteria	Acidithiobacillales	Acidithiobacillaceae	Acidithiobacillus	Acidithiobacillus caldus	1	3	2	0	0	0	2	3	1	0	1	0	2	1	1	3	5	8	9	1	10	3	3	0	0	0	19	2	14	2	5	2
1342	Bacteria	NA	Proteobacteria	Gammaproteobacteria	Thiotrichales	Piscirickettsiaceae	Methylophaga	Methylophaga thiooxydans	0	0	0	0	0	0	0	1	0	0	0	1	0	0	0	0	1	2	2	0	1	0	0	0	0	0	11	0	14	0	0	2
1343	Bacteria	NA	Proteobacteria	Gammaproteobacteria	Alteromonadales	Shewanellaceae	Shewanella	Shewanella violacea	0	0	0	0	0	1	0	0	0	0	0	1	0	0	0	0	1	2	14	0	3	0	1	0	0	0	5	2	5	0	0	1
1344	Bacteria	NA	Firmicutes	Bacilli	Lactobacillales	Streptococcaceae	Streptococcus	Streptococcus gallolyticus	13	29	69	50	244	363	877	796	51	696	41	1042	72	6	88	73	522	877	295	400	444	1094	35	55	872	437	1073	5	1074	146	379	51
1345	Bacteria	NA	Proteobacteria	Gammaproteobacteria	Enterobacteriales	Enterobacteriaceae	Citrobacter	Citrobacter rodentium	1	3	1	1	1	1	3	5	1	1	355	2	3	4	6	5	3	10	2	659	5	1	3	46	0	37	7	10	4	5	4	4
1346	Bacteria	NA	Proteobacteria	Gammaproteobacteria	Pasteurellales	Pasteurellaceae	Actinobacillus	Actinobacillus minor	0	3	148	59	77	73	253	10	37	5	2	257	142	209	107	967	3016	874	181	56	5443	93	133	2	25	7	7214	2977	5339	282	472	253
1347	Bacteria	NA	Proteobacteria	Epsilonproteobacteria	Campylobacterales	Helicobacteraceae	Helicobacter	Helicobacter pylori	0	0	0	0	0	0	0	0	0	0	0	0	0	0	0	0	0	0	0	0	0	0	0	1	0	0	0	0	0	0	0	0
1348	Bacteria	NA	Firmicutes	Bacilli	Lactobacillales	Streptococcaceae	Streptococcus	Streptococcus pneumoniae	0	1	9	8	24	17	86	7	9	76	6	11	3	0	2	5	23	22	14	2	46	16	22	1	3	2	21	0	13	10	6	2
1349	Bacteria	NA	Firmicutes	Bacilli	Lactobacillales	Streptococcaceae	Streptococcus	Streptococcus pneumoniae	0	2	89	406	288	106	1040	515	63	4678	59	353	38	1	120	201	199	1514	182	89	934	221	870	26	51	58	899	22	1067	199	149	72
1350	Bacteria	NA	Proteobacteria	Gammaproteobacteria	Legionellales	Legionellaceae	Legionella	Legionella longbeachae	0	0	0	0	0	0	0	1	0	0	0	0	0	0	0	0	0	0	0	0	0	0	0	0	0	0	0	0	0	0	0	0
1351	Bacteria	NA	Deferribacteres	Deferribacteres	Deferribacterales	Deferribacteraceae	Deferribacter	Deferribacter desulfuricans	0	0	0	1	0	0	0	1	0	0	0	0	0	0	0	0	0	1	0	0	0	0	1	1	0	0	0	0	0	0	0	1
1352	Bacteria	NA	Proteobacteria	Alphaproteobacteria	Rhizobiales	Xanthobacteraceae	Starkeya	Starkeya novella	1	1	6	1	0	1	12	2	1	0	15	1	1	4	0	0	3	19	5	7	22	19	11	2	1	2	4	4	11	10	1	3
1353	Bacteria	NA	Proteobacteria	Gammaproteobacteria	Enterobacteriales	Enterobacteriaceae	Klebsiella	Klebsiella variicola	6	11	11	18	2	4	57	16	2	6	2667	5	1	5	5	5	23	22	35	4835	20	8	10	452	5	440	56	12	21	18	8	2424
1354	Bacteria	NA	Actinobacteria	Actinobacteria	Actinomycetales	Segniliparaceae	Segniliparus	Segniliparus rotundus	0	4	1	2	2	4	20	5	4	0	1	2	0	0	0	1	1	5	10	3	5	15	13	1	7	0	1	0	2	3	3	2
1355	Bacteria	NA	Proteobacteria	Betaproteobacteria	Burkholderiales	Burkholderiaceae	Burkholderia	Burkholderia sp. CCGE1002	1	1	1	2	0	0	7	0	1	1	4	3	0	3	1	0	1	1	2	6	2	7	1	0	5	1	3	0	5	7	0	0
1356	Archaea	NA	Euryarchaeota	Halobacteria	Halobacteriales	Halobacteriaceae	Halobacterium	Halobacterium salinarum	0	0	0	0	0	0	8	0	1	0	0	0	0	0	0	0	0	2	0	0	2	1	0	0	1	0	0	0	0	1	0	0
1357	Bacteria	NA	Firmicutes	Clostridia	Clostridiales	Ruminococcaceae	Ruminococcus	Ruminococcus flavefaciens	1	0	0	2	3	0	1	4	1	0	0	23	3	2	0	0	14	29	60	2	33	30	43	2	1	5	32	0	23	26	16	3
1358	Bacteria	NA	Proteobacteria	Alphaproteobacteria	Rhizobiales	Brucellaceae	Ochrobactrum	Ochrobactrum intermedium	0	1	9	1	1	3	1	1	2	0	6	1	1	3	0	1	8	24	35	7	19	1	12	1	0	0	8	3	11	13	6	3
1359	Bacteria	NA	Actinobacteria	Actinobacteria	Bifidobacteriales	Bifidobacteriaceae	Parascardovia	Parascardovia denticolens	479	11	0	13	5	251	14876	1197	93	4	5	74	1	13	0	0	25	40	109	6	225	67	97	4	37	22	8	1	37	68	157	4
1360	Bacteria	NA	Actinobacteria	Actinobacteria	Bifidobacteriales	Bifidobacteriaceae	Scardovia	Scardovia inopinata	262	3	0	33	1	520	76	51	25	2	2	117	2	2	2	0	1	48	228	34	58	0	147	17	44	63	77	2	5	29	23	1
1361	Bacteria	NA	Proteobacteria	Betaproteobacteria	Neisseriales	Neisseriaceae	Neisseria	Neisseria sp. oral taxon 014	6	255	1359	274	81	96	29338	43	260	70	16	85	1848	1697	1399	7738	26353	6811	10566	19	43620	313	117	107	37	9	16502	3899	11973	234	138	731
1362	Viruses	NA	NA	NA	Caudovirales	Siphoviridae	NA	Streptococcus phage Sfi21	1	0	2	1	13	23	3	0	9	0	0	41	1	0	0	0	2	0	1	0	4	13	0	25	0	0	609	1	0	1	1	1
1363	Bacteria	NA	Bacteroidetes	Flavobacteriia	Flavobacteriales	NA	Candidatus Sulcia	Candidatus Sulcia muelleri	0	0	0	0	0	0	0	0	0	0	0	1	0	0	0	0	0	0	0	0	1	0	0	0	0	0	1	0	0	0	1	0
1364	Viruses	NA	NA	NA	NA	Flaviviridae	Flavivirus	Bagaza virus	0	0	0	1	0	0	0	0	0	0	0	0	0	0	0	0	0	0	0	0	0	0	0	0	0	0	0	0	0	0	0	0
1365	Bacteria	NA	Firmicutes	Clostridia	Clostridiales	Syntrophomonadaceae	Syntrophothermus	Syntrophothermus lipocalidus	0	0	0	1	1	0	1	0	0	0	0	0	0	0	0	0	1	1	4	0	6	3	0	0	0	0	10	0	2	9	1	0
1366	Viruses	NA	NA	NA	Caudovirales	Siphoviridae	NA	Streptococcus phage PH10	0	2	11	721	829	1609	1298	1173	449	388	26	10	4	34	197	95	695	747	337	153	978	1444	496	26	42	11	360	8	432	1111	725	171
1367	Bacteria	NA	Proteobacteria	Alphaproteobacteria	Rhodobacterales	Rhodobacteraceae	Ruegeria	Ruegeria lacuscaerulensis	3	6	3	12	2	4	1	2	0	3	13	3	1	1	0	0	1	1	1	17	2	0	0	2	2	0	2	1	0	3	1	1
1368	Eukaryota	Fungi	Ascomycota	Saccharomycetes	Saccharomycetales	Saccharomycetaceae	Komagataella	Komagataella pastoris	0	0	0	0	0	1	0	0	0	0	0	0	0	0	0	0	0	0	1	0	1	0	0	0	0	0	0	0	0	0	0	0
1369	Archaea	NA	Euryarchaeota	Methanococci	Methanococcales	Methanocaldococcaceae	Methanocaldococcus	Methanocaldococcus sp. FS406-22	0	0	0	0	0	0	0	0	0	0	0	0	0	0	0	0	0	0	0	0	0	0	0	0	1	0	0	0	0	0	0	0
1370	Bacteria	NA	Proteobacteria	Deltaproteobacteria	Desulfarculales	Desulfarculaceae	Desulfarculus	Desulfarculus baarsii	2	0	1	3	0	5	11	3	0	0	4	2	0	0	0	0	4	6	6	1	10	3	1	1	1	0	9	0	6	3	3	0
1371	Bacteria	NA	Actinobacteria	Actinobacteria	Actinomycetales	Actinomycetaceae	Arcanobacterium	Arcanobacterium haemolyticum	0	48	0	13	4	13	57	228	26	1	8	19	2	8	0	0	44	628	338	43	92	131	192	13	599	14	11	0	9	17	42	1
1372	Archaea	NA	Euryarchaeota	Methanomicrobia	Methanosarcinales	Methanosarcinaceae	Methanohalobium	Methanohalobium evestigatum	0	0	0	0	0	0	0	1	0	0	1	0	0	0	0	0	0	0	0	0	0	0	0	0	0	0	0	0	0	0	0	0
1373	Bacteria	NA	Cyanobacteria	NA	Chroococcales	NA	Synechococcus	Synechococcus sp. CC9311	0	0	0	0	0	0	0	0	0	0	0	0	0	0	0	0	2	1	0	0	0	1	1	0	0	0	0	0	0	0	1	0
1374	Bacteria	NA	Actinobacteria	Actinobacteria	Actinomycetales	Corynebacteriaceae	Corynebacterium	Corynebacterium kroppenstedtii	8	12	7	13	7	10	103	118	13	0	5	12	9	11	2	4	13	26	24	21	15	27	46	5	98	1	18	15	20	25	9	2
1375	Bacteria	NA	Firmicutes	Clostridia	Clostridiales	Peptostreptococcaceae	Peptoclostridium	Peptoclostridium difficile	1	20	0	57	114	100	39	94	52	25	0	3782	13	7	7	52	610	881	2271	150	5735	5057	1664	228	229	817	1256	25	1555	597	832	443
1376	Bacteria	NA	Actinobacteria	Actinobacteria	Actinomycetales	Streptomycetaceae	Streptomyces	Streptomyces sp. e14	0	36	3	15	24	58	507	52	51	4	16	17	0	2	2	2	22	25	33	20	21	35	111	6	56	7	16	2	15	29	28	7
1377	Bacteria	NA	Firmicutes	Bacilli	Lactobacillales	Enterococcaceae	Enterococcus	Enterococcus faecium	0	0	29	0	0	0	0	13	1	0	0	3	0	0	1	0	3	0	4	0	8	0	1	0	0	0	8	0	0	1	0	0
1378	Viruses	NA	NA	NA	Caudovirales	Siphoviridae	NA	Streptococcus phage 5093	2	0	2	67	8	24	37	14	3	19	1	5980	0	0	0	0	3	0	1	11	34	66	51	225	235	2	15	2	4	2	5	0
1379	Bacteria	NA	Deinococcus-Thermus	Deinococci	Deinococcales	Trueperaceae	Truepera	Truepera radiovictrix	0	1	0	1	0	0	5	1	0	0	0	1	0	0	0	0	1	3	5	2	2	2	0	0	1	1	2	0	2	2	0	0
1380	Bacteria	NA	Actinobacteria	Actinobacteria	Actinomycetales	Actinomycetaceae	Actinomyces	Actinomyces odontolyticus	91	22624	7520	85394	19847	5067	79882	67826	11946	1516	7751	49776	4943	41968	1616	5446	236254	296522	506345	58702	511621	557684	321429	29276	197778	112954	132510	713	84092	96306	109040	8736
1381	Bacteria	NA	Actinobacteria	Actinobacteria	Actinomycetales	Corynebacteriaceae	Corynebacterium	Corynebacterium ammoniagenes	1	13	0	2	5	1	16	1	17	1	1	2	0	2	0	0	4	9	5	2	5	1	4	0	8	0	0	0	3	4	1	0
1382	Eukaryota	NA	NA	NA	Pythiales	Pythiaceae	Pythium	Pythium ultimum	0	0	0	0	0	0	0	0	0	0	0	0	0	0	0	0	0	0	0	0	0	0	0	0	0	0	0	0	0	0	1	0
1383	Bacteria	NA	Cyanobacteria	NA	Chroococcales	NA	Cyanothece	Cyanothece sp. PCC 7424	0	1	0	1	0	0	0	1	0	0	0	3	0	0	0	0	1	2	0	0	0	0	0	0	0	0	0	0	1	2	0	0
1384	Bacteria	NA	Firmicutes	Bacilli	Bacillales	Listeriaceae	Listeria	Listeria monocytogenes	0	0	0	2	0	1	13	0	0	0	0	0	0	0	1	0	0	0	0	6	15	0	34	0	0	1	46	0	29	0	0	1
1385	Bacteria	NA	Firmicutes	Bacilli	Lactobacillales	Leuconostocaceae	Oenococcus	Oenococcus oeni	344	1	2	1	1	0	4	5	0	0	1	11	0	0	0	0	0	3	7	0	2	4	5	4	1	4	1	0	2	0	1	0
1386	Bacteria	NA	Firmicutes	Bacilli	Lactobacillales	Aerococcaceae	Aerococcus	Aerococcus viridans	0	37	5	27	60	47	601	764	55	35	20	1580	30	17	70	76	304	886	158	156	1102	437	181	55	324	1	1312	7	896	61	442	15
1387	Bacteria	NA	Firmicutes	Bacilli	Lactobacillales	Streptococcaceae	Streptococcus	Streptococcus oralis	52	19886	10966	11980	83021	202083	562624	81578	34811	15412	12018	16960	3299	941	7475	8477	11842	48518	45684	7594	83735	37138	26294	4670	19065	2316	70786	1517	45947	11548	48304	2585
1388	Bacteria	NA	Bacteroidetes	Flavobacteriia	Flavobacteriales	Flavobacteriaceae	Zunongwangia	Zunongwangia profunda	0	3	2	0	3	0	0	0	0	0	0	1	0	0	0	1	7	2	35	1	11	36	47	1	1	1	12	0	38	14	42	3
1389	Bacteria	NA	Proteobacteria	Gammaproteobacteria	Enterobacteriales	Enterobacteriaceae	Escherichia	Escherichia coli	5	13	26	21	2	0	13	14	1	2	14	9	5	11	7	4	2	18	1	25	2	5	3	4	7	1	26	62	25	9	3	3
1390	Bacteria	NA	Proteobacteria	Gammaproteobacteria	Enterobacteriales	Enterobacteriaceae	Escherichia	Escherichia coli	19	24	0	0	10	1	0	39	4	5	40	23	9	34	29	10	38	1	5	74	0	16	29	7	21	0	127	1	1	26	7	16
1391	Bacteria	NA	Chlamydiae	Chlamydiia	Chlamydiales	Chlamydiaceae	Chlamydia	Chlamydia trachomatis	0	0	0	0	0	0	1	0	0	0	0	2	0	1	0	1	0	1	1	0	0	1	0	0	0	0	0	12	1	0	1	0
1392	Bacteria	NA	Proteobacteria	Gammaproteobacteria	Legionellales	Legionellaceae	Legionella	Legionella longbeachae	0	0	0	0	0	0	2	1	0	0	0	1	0	0	0	0	0	2	0	0	2	0	0	0	0	0	2	0	6	1	0	0
1393	Bacteria	NA	Proteobacteria	Alphaproteobacteria	Rhizobiales	Methylobacteriaceae	Methylobacterium	Methylobacterium extorquens	0	4	5	1	0	0	9	2	0	1	24	0	0	9	0	0	1	38	0	27	0	14	1	0	6	1	5	2	17	2	6	0
1394	Bacteria	NA	Proteobacteria	Gammaproteobacteria	Vibrionales	Vibrionaceae	Vibrio	Vibrio cholerae	0	0	0	0	0	0	0	0	0	0	0	0	0	1	0	0	1	0	0	0	0	0	0	0	0	0	0	1	0	0	0	0
1395	Bacteria	NA	Actinobacteria	Actinobacteria	Actinomycetales	Corynebacteriaceae	Corynebacterium	Corynebacterium resistens	0	0	0	0	0	0	0	0	0	0	0	0	0	1	0	0	0	1	108	0	4	4	0	0	0	1	0	0	0	0	1	0
1396	Viruses	NA	NA	NA	Caudovirales	Siphoviridae	NA	Enterococcus phage phiEf11	0	0	0	0	0	0	0	0	0	0	0	1	0	0	0	0	0	0	0	0	0	0	0	0	0	0	0	0	0	0	0	0
1397	Bacteria	NA	Actinobacteria	Actinobacteria	Actinomycetales	Mycobacteriaceae	Mycobacterium	Mycobacterium tuberculosis	0	0	0	0	0	0	0	1	0	0	0	0	0	0	0	0	2	0	11	0	0	7	12	0	0	0	0	0	0	5	0	0
1398	Bacteria	NA	Proteobacteria	Gammaproteobacteria	Enterobacteriales	Enterobacteriaceae	Erwinia	Erwinia amylovora	0	0	0	0	0	0	3	0	0	0	11	0	0	0	0	0	0	0	0	0	0	0	0	0	0	4	0	0	0	0	0	0
1399	Archaea	NA	Crenarchaeota	Thermoprotei	Acidilobales	Acidilobaceae	Acidilobus	Acidilobus saccharovorans	0	0	0	0	0	0	0	0	0	0	0	0	0	0	0	0	0	0	0	0	0	0	0	0	0	0	1	0	0	0	0	0
1400	Bacteria	NA	Proteobacteria	Betaproteobacteria	Methylophilales	Methylophilaceae	Methylotenera	Methylotenera versatilis	0	0	1	1	0	0	8	0	0	0	0	3	0	0	0	0	5	0	2	0	8	1	0	0	0	0	8	0	44	1	1	1
1401	Bacteria	NA	Proteobacteria	Alphaproteobacteria	Rhizobiales	Bradyrhizobiaceae	Afipia	Afipia sp. 1NLS2	1	1	2	1	1	0	0	10	1	0	4	1	0	1	1	0	1	5	5	2	2	0	2	0	2	0	1	3	0	2	0	2
1402	Bacteria	NA	Firmicutes	Bacilli	Bacillales	Bacillaceae	Bacillus	Bacillus clausii	1	1	3	0	0	0	1	1	0	0	0	1	0	0	0	0	0	2	1	20	2	1	3	1	0	0	12	0	0	1	3	1
1403	Bacteria	NA	Proteobacteria	Gammaproteobacteria	Enterobacteriales	Enterobacteriaceae	Serratia	Serratia odorifera	2	1	0	1	0	0	1	0	0	0	45	7	0	0	0	1	1	2	1	65	5	7	2	10	3	5	3	1	2	26	4	1
1404	Bacteria	NA	Proteobacteria	Gammaproteobacteria	Pasteurellales	Pasteurellaceae	Aggregatibacter	Aggregatibacter actinomycetemcomitans	0	48	165	62	1270	4859	756	17	55	9	2	278	99	24	129	297	4817	890	1795	50	7397	183	330	14	26	2	4275	2158	4371	342	686	315
1405	Bacteria	NA	Proteobacteria	Gammaproteobacteria	Pasteurellales	Pasteurellaceae	Mannheimia	Mannheimia haemolytica	0	1	100	41	94	22	151	2	16	5	1	139	96	42	88	617	2118	645	168	28	2029	61	109	4	18	3	3305	639	3593	218	338	287
1406	Bacteria	NA	Proteobacteria	Gammaproteobacteria	Vibrionales	Vibrionaceae	Vibrio	Vibrio mimicus	0	0	2	2	2	1	6	0	1	0	0	1	0	1	0	2	18	9	1	0	29	2	3	1	1	1	44	4	47	3	5	2
159	Bacteria	NA	Proteobacteria	Gammaproteobacteria	Pseudomonadales	Pseudomonadaceae	Pseudomonas	Pseudomonas syringae group genomosp. 3	0	1	6	2	0	0	3	3	1	0	54	4	0	1	0	0	6	1	2	67	2	2	0	6	2	1	2	0	2	7	0	0
1105	Bacteria	NA	Proteobacteria	Gammaproteobacteria	Pseudomonadales	Pseudomonadaceae	Pseudomonas	Pseudomonas syringae group genomosp. 3	0	0	0	1	0	0	1	0	0	0	5	0	0	0	0	0	0	1	0	5	0	0	1	0	0	0	0	1	0	0	0	0
1407	Bacteria	NA	Proteobacteria	Gammaproteobacteria	Pseudomonadales	Pseudomonadaceae	Pseudomonas	Pseudomonas syringae group genomosp. 3	0	0	0	0	0	0	0	0	0	0	4	0	0	0	0	0	0	0	0	5	1	0	1	1	0	0	0	0	0	1	0	0
1410	Bacteria	NA	Proteobacteria	Gammaproteobacteria	Vibrionales	Vibrionaceae	Vibrio	Vibrio harveyi	0	0	0	0	0	0	2	0	0	0	0	2	1	0	1	0	7	11	1	0	8	0	2	0	0	0	18	0	16	3	3	0
1411	Bacteria	NA	Proteobacteria	Gammaproteobacteria	Vibrionales	Vibrionaceae	Vibrio	Vibrio alginolyticus	0	0	0	0	2	1	0	0	0	0	0	3	0	0	0	0	12	11	2	0	7	1	1	0	0	0	24	2	20	1	6	0
1412	Bacteria	NA	Proteobacteria	Gammaproteobacteria	Vibrionales	Vibrionaceae	Vibrio	Vibrio cholerae	0	2	0	0	0	0	1	0	0	0	0	0	0	0	0	0	0	0	0	0	2	0	0	0	0	0	1	0	2	0	0	0
1413	Bacteria	NA	Proteobacteria	Gammaproteobacteria	Vibrionales	Vibrionaceae	Vibrio	Vibrio sp. RC341	0	0	1	1	1	0	5	0	1	0	0	3	1	0	3	1	30	4	6	1	14	2	3	0	3	0	16	2	36	1	4	1
1414	Bacteria	NA	Proteobacteria	Gammaproteobacteria	Vibrionales	Vibrionaceae	Vibrio	Vibrio furnissii	0	0	2	2	0	1	1	1	1	1	10	2	1	0	3	2	18	5	7	27	19	3	3	2	5	2	59	2	31	6	4	3
1415	Bacteria	NA	Proteobacteria	Gammaproteobacteria	Vibrionales	Vibrionaceae	Grimontia	Grimontia hollisae	0	0	0	1	0	0	0	0	0	0	1	2	0	0	0	0	9	4	6	1	7	2	3	0	0	0	15	0	10	0	2	0
1416	Bacteria	NA	Proteobacteria	Gammaproteobacteria	Vibrionales	Vibrionaceae	Vibrio	Vibrio metschnikovii	0	0	2	0	0	0	0	0	1	0	0	3	1	0	1	2	24	10	9	1	28	2	1	0	3	1	62	5	75	7	5	3
1417	Bacteria	NA	Proteobacteria	Gammaproteobacteria	Vibrionales	Vibrionaceae	Vibrio	Vibrio coralliilyticus	0	0	0	1	0	0	0	0	0	0	0	2	1	0	0	0	3	3	2	0	3	0	2	0	0	0	17	3	12	1	2	2
1418	Bacteria	NA	Proteobacteria	Gammaproteobacteria	Vibrionales	Vibrionaceae	Vibrio	Vibrio sp. RC586	0	0	1	0	2	0	2	0	0	0	0	4	0	0	4	2	9	4	2	1	19	0	0	0	1	0	22	0	40	0	0	5
1419	Bacteria	NA	Proteobacteria	Gammaproteobacteria	Vibrionales	Vibrionaceae	Vibrio	Vibrio orientalis	0	0	2	1	1	1	0	0	0	0	0	1	0	0	1	3	14	6	2	0	25	3	8	0	0	0	24	2	35	6	5	3
1420	Bacteria	NA	Proteobacteria	Gammaproteobacteria	Vibrionales	Vibrionaceae	Photobacterium	Photobacterium damselae	0	1	7	1	1	9	14	3	0	0	18	23	2	2	4	8	37	50	23	23	45	7	21	1	3	1	97	8	98	21	26	3
1421	Bacteria	NA	Firmicutes	Bacilli	Lactobacillales	Lactobacillaceae	Lactobacillus	Lactobacillus crispatus	101	0	0	0	0	0	0	2	1	0	0	6	0	0	0	0	0	0	0	0	0	0	0	11	0	0	1	0	0	2	0	0
1422	Bacteria	NA	Bacteroidetes	Bacteroidia	Bacteroidales	Prevotellaceae	Prevotella	Prevotella timonensis	108	51	5	610	349	279	562	2317	133	112	48	13274	28	141	149	97	4215	5161	36202	261	36768	10421	9261	696	1071	1595	12315	101	1305	17159	6268	891
1423	Bacteria	NA	Bacteroidetes	Bacteroidia	Bacteroidales	Prevotellaceae	Prevotella	Prevotella buccalis	79	85	1	438	248	394	486	826	125	33	28	5942	32	110	54	80	3410	4648	40443	163	28247	9873	8775	804	821	1319	4525	66	2328	19204	2159	558
1424	Bacteria	NA	Firmicutes	Erysipelotrichia	Erysipelotrichales	Erysipelotrichaceae	Bulleidia	Bulleidia extructa	19	213	8	725	514	6079	458	722	287	1370	14	2116	31	22	55	153	1218	1119	8974	364	20100	3581	6581	3893	419	1387	3349	55	1722	1877	1266	1379
1425	Bacteria	NA	Actinobacteria	Actinobacteria	Actinomycetales	Propionibacteriaceae	Propionibacterium	Propionibacterium acnes	26	102	80	214	40	41	54	443	70	13	33	35	94	412	32	11	115	149	22	47	38	417	98	53	135	3	146	2787	209	53	41	43
1426	Bacteria	NA	Actinobacteria	Actinobacteria	Actinomycetales	Propionibacteriaceae	Propionibacterium	Propionibacterium acnes	3	5	0	5	0	3	1	5	4	0	3	1	4	6	1	0	3	7	0	5	0	3	1	0	3	3	5	11	0	1	9	1
1427	Bacteria	NA	Firmicutes	Bacilli	Lactobacillales	Lactobacillaceae	Lactobacillus	Lactobacillus gasseri	1285	6	1	2	1	20	39	57	0	1	4	26	2	2	0	0	12	16	5	0	12	4	14	456	5	94	29	1	5	49	9	1
1428	Bacteria	NA	Proteobacteria	Gammaproteobacteria	Enterobacteriales	Enterobacteriaceae	Escherichia	Escherichia coli	0	0	1	2	1	1	2	0	3	0	21	4	0	2	1	0	0	2	0	28	0	0	0	0	0	0	2	2	0	0	1	6
1429	Bacteria	NA	Proteobacteria	Gammaproteobacteria	Enterobacteriales	Enterobacteriaceae	Escherichia	Escherichia coli	0	1	1	0	0	0	0	1	0	0	7	2	0	0	2	0	0	3	0	5	1	0	0	0	0	3	0	3	0	1	0	0
1430	Bacteria	NA	Proteobacteria	Gammaproteobacteria	Enterobacteriales	Enterobacteriaceae	Escherichia	Escherichia coli	0	7	43	17	2	4	8	31	2	10	55	10	23	35	11	0	8	12	3	33	0	5	13	2	13	3	32	29	7	5	4	16
1431	Eukaryota	NA	NA	NA	Kinetoplastida	Trypanosomatidae	Trypanosoma	Trypanosoma brucei	0	0	0	0	0	0	1	0	0	0	0	0	0	0	0	1	0	0	0	0	0	0	0	0	0	0	0	0	0	0	0	0
1432	Bacteria	NA	Proteobacteria	Epsilonproteobacteria	Campylobacterales	Helicobacteraceae	Helicobacter	Helicobacter mustelae	0	0	0	0	0	0	0	1	0	0	0	0	0	0	0	0	0	0	0	0	0	0	0	0	2	0	1	0	0	0	0	0
1433	Archaea	NA	Euryarchaeota	Methanomicrobia	Methanomicrobiales	Methanomicrobiaceae	Methanoplanus	Methanoplanus petrolearius	0	1	0	0	0	0	0	0	0	0	0	0	0	0	0	0	0	0	0	0	0	0	0	0	0	0	1	0	0	0	0	0
1434	Bacteria	NA	Actinobacteria	Actinobacteria	Actinomycetales	Streptomycetaceae	Streptomyces	Streptomyces scabiei	0	16	2	4	44	27	145	13	24	0	4	23	0	13	0	4	7	65	39	12	26	31	15	35	56	8	8	0	6	14	10	1
1435	Bacteria	NA	Actinobacteria	Actinobacteria	Actinomycetales	Micrococcaceae	Rothia	Rothia mucilaginosa	389	40933	40559	56558	53345	23825	1244094	685810	44941	57173	37010	1613357	98645	51876	70674	282669	54837	1667791	41868	333136	1182113	334528	39997	67848	646219	59676	1122977	16316	1432151	84785	44012	23253
1436	Bacteria	NA	Firmicutes	Bacilli	Bacillales	Staphylococcaceae	Staphylococcus	Staphylococcus aureus	0	0	0	0	0	0	0	2	0	0	0	0	0	0	0	0	0	0	0	0	0	0	1	0	0	0	0	0	0	0	0	0
1437	Bacteria	NA	Firmicutes	Bacilli	Bacillales	Staphylococcaceae	Staphylococcus	Staphylococcus aureus	0	4	1	0	0	0	23	1	0	3	4	1	1	17	0	0	4	2	5	5	14	1	51	0	1	0	1	0	2	10	2	0
1438	Bacteria	NA	Actinobacteria	Actinobacteria	Bifidobacteriales	Bifidobacteriaceae	Gardnerella	Gardnerella vaginalis	0	0	3	0	0	1	0	1	0	1	0	0	0	0	0	0	0	1	55	2	6	7	1	1	5	4	1	1	4	0	22	0
1439	Bacteria	NA	Actinobacteria	Actinobacteria	Bifidobacteriales	Bifidobacteriaceae	Gardnerella	Gardnerella vaginalis	2	1	1	5	1	3	2	2	6	3	6	1134	2	7	0	1	20	17	31	3	36	24	58	8	9	847	19	5	38	20	32	6
1440	Viruses	NA	NA	NA	Caudovirales	Siphoviridae	NA	Streptococcus phage ALQ13.2	0	0	0	3	0	1	2	0	0	0	1	540	0	0	0	0	1	33	4	2	3	3	6	61	48	0	0	0	0	1	3	0
1441	Bacteria	NA	Proteobacteria	Epsilonproteobacteria	Campylobacterales	Campylobacteraceae	Campylobacter	Campylobacter jejuni	0	0	0	0	0	0	0	0	0	0	0	0	0	0	0	1	0	0	0	0	2	0	0	0	0	0	2	0	0	0	0	0
1442	Bacteria	NA	Proteobacteria	Epsilonproteobacteria	Campylobacterales	Campylobacteraceae	Campylobacter	Campylobacter jejuni	0	1	0	0	3	0	0	0	1	0	0	0	0	0	0	1	3	0	1	0	3	0	0	0	1	0	0	0	0	1	0	0
1443	Viruses	NA	NA	NA	Caudovirales	Myoviridae	NA	Aggregatibacter phage S1249	0	0	0	0	1	0	5	0	0	0	0	0	0	0	0	0	22	0	7	0	9	1	0	1	0	0	169	4	58	0	0	20
1444	Bacteria	NA	Firmicutes	Bacilli	Bacillales	Listeriaceae	Listeria	Listeria seeligeri	0	4	3	0	0	0	4	82	1	0	1	148	3	0	2	7	7	103	4	5	30	74	8	7	4	0	125	0	17	17	8	0
1445	Bacteria	NA	Firmicutes	Bacilli	Lactobacillales	Streptococcaceae	Lactococcus	Lactococcus lactis	1	7	7	5	5	0	3	95	0	6	1	1213	0	0	6	6	102	53	20	2	7	42	43	5	7	0	13	2	4	30	2	0
1446	Bacteria	NA	Proteobacteria	Epsilonproteobacteria	Campylobacterales	Helicobacteraceae	Helicobacter	Helicobacter pylori	0	0	0	0	0	0	0	0	0	0	0	0	0	0	0	0	0	0	0	0	1	0	0	0	0	0	1	0	0	0	0	0
1447	Bacteria	NA	Proteobacteria	Alphaproteobacteria	Sphingomonadales	Sphingomonadaceae	Citromicrobium	Citromicrobium bathyomarinum	2	3	2	4	0	0	5	25	3	1	8	1	0	5	0	0	2	2	0	1	4	1	0	1	0	1	2	2	3	3	0	0
1448	Bacteria	NA	Actinobacteria	Actinobacteria	Actinomycetales	Propionibacteriaceae	Propionibacterium	Propionibacterium acnes	3	6	7	10	1	2	7	17	2	1	5	2	2	16	0	0	0	1	3	1	4	5	4	2	0	0	10	49	12	1	5	0
1449	Bacteria	NA	Firmicutes	Negativicutes	Selenomonadales	Veillonellaceae	Veillonella	Veillonella parvula	137	845	1045	3880	2281	36729	26651	26724	4539	219	537	68962	350	625	357	1886	22874	70421	41601	2714	39027	60321	82706	7522	27098	15308	109621	258	57843	18721	39581	2505
1450	Viruses	NA	NA	NA	NA	Anelloviridae	Alphatorquevirus	Torque teno virus 1	0	0	0	0	0	0	0	0	0	0	0	0	0	0	0	0	0	0	0	0	5	0	0	0	0	0	0	0	0	0	0	0
1451	Viruses	NA	NA	NA	NA	Anelloviridae	Alphatorquevirus	Torque teno virus 7	0	0	0	0	0	0	0	0	0	0	0	0	0	0	0	0	0	0	0	0	2	0	0	0	0	0	0	0	0	0	0	0
1452	Viruses	NA	NA	NA	NA	Anelloviridae	Alphatorquevirus	Torque teno virus 8	0	0	0	0	0	0	0	0	0	0	0	0	0	0	0	0	0	0	0	0	0	0	0	0	1	0	0	0	0	0	0	0
1453	Viruses	NA	NA	NA	NA	Anelloviridae	Alphatorquevirus	Torque teno virus 10	0	0	0	0	0	0	0	0	0	0	0	0	0	0	0	0	0	0	0	0	2	0	0	0	0	0	0	0	0	0	0	0
1454	Bacteria	NA	Proteobacteria	Gammaproteobacteria	Enterobacteriales	Enterobacteriaceae	Yersinia	Yersinia pestis	0	0	0	0	0	0	0	0	0	0	0	0	0	0	0	0	1	0	0	0	0	0	0	2	0	0	2	0	0	0	0	0
1455	Eukaryota	Fungi	Ascomycota	Dothideomycetes	Pleosporales	Lentitheciaceae	Lentithecium	Lentithecium aquaticum	0	0	0	0	0	0	1	0	0	0	0	0	0	0	0	0	0	0	0	0	0	0	0	0	0	0	0	0	0	0	0	0
1456	Bacteria	NA	Firmicutes	Bacilli	Bacillales	Bacillaceae	Geobacillus	Geobacillus sp. C56-T3	0	1	0	0	0	0	15	1	0	0	0	3	0	0	0	0	1	2	26	19	9	0	5	0	0	0	0	0	1	0	0	0
1457	Bacteria	NA	Proteobacteria	Gammaproteobacteria	Enterobacteriales	Enterobacteriaceae	Cronobacter	Cronobacter turicensis	0	0	0	0	0	0	0	0	0	0	29	0	0	0	0	0	0	0	0	146	0	0	0	3	0	5	0	0	0	0	0	0
1458	Viruses	NA	NA	NA	NA	Fuselloviridae	Alphafusellovirus	Sulfolobus spindle-shaped virus 7	0	0	0	0	0	0	0	0	0	0	0	0	0	0	0	0	0	0	0	0	2	0	0	0	0	0	0	0	0	0	0	0
1459	Bacteria	NA	Firmicutes	Bacilli	Bacillales	Staphylococcaceae	Staphylococcus	Staphylococcus lugdunensis	0	1	1	1	0	0	6	11	1	0	1	43	0	1	0	0	12	22	4	4	14	16	7	5	9	0	21	3	13	2	3	0
1460	Bacteria	NA	Firmicutes	Clostridia	Clostridiales	Peptostreptococcaceae	Peptoclostridium	Peptoclostridium difficile	0	0	5	1	1	1	816	2	1	0	0	18	0	0	0	1	7	48	34	2	21	93	43	7	7	12	19	3	44	20	24	6
1461	Bacteria	NA	Firmicutes	Clostridia	Clostridiales	Peptostreptococcaceae	Peptoclostridium	Peptoclostridium difficile	0	0	0	1	4	2	1	1	1	0	13	766	0	0	1	1	4	2	17	0	66	3	382	5	1	13	21	2	4	118	154	14
1462	Bacteria	NA	Firmicutes	Clostridia	Clostridiales	Peptostreptococcaceae	Peptoclostridium	Peptoclostridium difficile	8	2	1	3	5	4	2710	4	11	1	1	18	0	4	0	2	161	31	73	3	188	376	30	8	8	3	455	0	44	53	62	13
1463	Bacteria	NA	Firmicutes	Bacilli	Bacillales	Bacillaceae	Bacillus	Bacillus cereus	0	0	0	0	0	0	0	1	0	0	0	1	0	0	0	0	0	0	0	0	1	0	1	0	0	0	1	0	3	0	1	1
1464	Bacteria	NA	Firmicutes	Bacilli	Lactobacillales	Enterococcaceae	Enterococcus	Enterococcus faecalis	0	0	1	2	0	0	6	3	0	1	0	3	0	0	5	0	3	1	0	0	1	3	0	0	0	0	5	0	2	118	1	0
1465	Bacteria	NA	Firmicutes	Bacilli	Lactobacillales	Enterococcaceae	Enterococcus	Enterococcus faecalis	0	0	1	4	5	0	17	14	7	1	10	3248	1	0	4	7	6	3	14	0	57	22	375	4	11	2	23	0	3	6	121	18
1466	Bacteria	NA	Firmicutes	Negativicutes	Selenomonadales	Veillonellaceae	Megasphaera	Megasphaera genomosp. type_1	17	44	14	182	74	66	206	452	85	4	55	6495	24	73	35	37	978	2597	10317	134	5286	2346	5687	203	644	902	915	12	2660	3065	1415	291
1467	Bacteria	NA	Firmicutes	Clostridia	Clostridiales	NA	NA	Clostridiales genomosp. BVAB3	0	5	1	68	53	122	80	99	101	6	11	1591	3	52	1	2	1090	1085	2330	119	2700	5510	1559	129	152	190	2004	8	582	1204	398	166
1468	Bacteria	NA	Proteobacteria	Gammaproteobacteria	Enterobacteriales	Enterobacteriaceae	Escherichia	Escherichia coli	155	200	104	191	67	5	111	362	0	16	317	157	34	366	294	90	125	246	14	179	23	139	95	48	86	12	830	265	142	146	77	93
1469	Bacteria	NA	Bacteroidetes	Bacteroidia	Bacteroidales	Bacteroidaceae	Bacteroides	Bacteroides ovatus	0	1	0	4	10	8	3	4	2	1	2	2	1	2	0	1	42	39	340	8	239	7	2	2	2	41	30	0	4	23	56	5
1470	Bacteria	NA	Bacteroidetes	Bacteroidia	Bacteroidales	Bacteroidaceae	Bacteroides	Bacteroides xylanisolvens	0	3	0	4	7	0	9	1	0	1	1	0	1	0	0	1	2	1	15	0	22	0	5	2	0	14	3	0	4	1	40	0
1471	Bacteria	NA	Bacteroidetes	Bacteroidia	Bacteroidales	Bacteroidaceae	Bacteroides	Bacteroides vulgatus	3	1	1	12	3	13	16	25	2	0	0	1393	5	12	0	1	293	918	2545	2	2165	476	898	29	32	18	40	13	42	370	211	13
1472	Bacteria	NA	Bacteroidetes	Bacteroidia	Bacteroidales	Bacteroidaceae	Bacteroides	Bacteroides xylanisolvens	0	2	0	4	7	0	10	0	0	1	0	1	1	0	0	1	1	2	13	0	4	0	3	2	0	14	2	0	2	1	39	0
1473	Bacteria	NA	Firmicutes	Erysipelotrichia	Erysipelotrichales	Erysipelotrichaceae	Turicibacter	Turicibacter sanguinis	0	1	0	0	0	2	13	34	2	1	2	51	1	1	0	0	14	33	25	8	72	26	14	2	14	0	75	1	70	6	26	1
1474	Bacteria	NA	Firmicutes	Bacilli	Bacillales	Bacillaceae	Bacillus	Bacillus subtilis	0	0	0	0	0	8	1	12	2	0	1	5	0	0	0	7	0	6	1	4	7	1	7	0	2	0	2	0	0	1	1	0
1475	Eukaryota	Viridiplantae	Chlorophyta	Mamiellophyceae	Mamiellales	NA	Ostreococcus	Ostreococcus tauri	0	0	0	0	0	0	0	0	0	0	0	0	0	0	0	0	0	0	0	0	0	0	0	0	0	0	0	1	0	0	0	0
1476	Bacteria	NA	Chlamydiae	Chlamydiia	Chlamydiales	Chlamydiaceae	Chlamydia	Chlamydia trachomatis	0	0	0	0	0	0	0	0	0	0	0	0	0	0	0	0	0	0	0	0	0	0	0	0	0	0	0	186	0	0	0	0
1477	Bacteria	NA	Proteobacteria	Gammaproteobacteria	Pseudomonadales	Moraxellaceae	Acinetobacter	Acinetobacter haemolyticus	54	96	75	73	28	21	58	183	26	20	190	62	33	154	70	33	102	140	35	397	27	58	41	46	55	50	429	160	155	77	38	52
1478	Viruses	NA	NA	NA	Caudovirales	Myoviridae	T4likevirus	Klebsiella phage KP15	0	0	0	0	0	0	0	0	0	1	0	0	0	0	0	0	0	0	0	0	0	0	0	0	0	0	0	0	0	0	0	0
1479	Bacteria	NA	Proteobacteria	Gammaproteobacteria	Pseudomonadales	Moraxellaceae	Acinetobacter	Acinetobacter baumannii	0	1	0	0	0	0	0	1	1	0	11	0	0	0	0	0	0	0	0	35	0	0	0	4	1	7	0	2	0	0	0	0
1480	Bacteria	NA	Proteobacteria	Gammaproteobacteria	Pseudomonadales	Moraxellaceae	Acinetobacter	Acinetobacter baumannii	0	0	0	0	0	0	0	1	0	0	0	0	0	0	0	0	0	0	0	1	0	0	0	0	0	0	0	0	0	0	0	0
1481	Bacteria	NA	Tenericutes	Mollicutes	Mycoplasmatales	Mycoplasmataceae	Mycoplasma	Mycoplasma gallisepticum	0	0	0	0	0	0	0	0	0	0	0	0	0	0	0	0	0	0	0	0	5	1	0	0	0	0	0	0	0	0	1	0
1482	Bacteria	NA	Firmicutes	Bacilli	Lactobacillales	Lactobacillaceae	Lactobacillus	Lactobacillus fermentum	19	0	1	27	0	5	280	1009	0	0	0	0	0	0	0	0	56	232	0	0	0	0	0	0	290	0	0	1	36	156	93	0
1483	Bacteria	NA	Firmicutes	Bacilli	Lactobacillales	Lactobacillaceae	Lactobacillus	Lactobacillus salivarius	2787	57	17	164	143	301	1234	1660	89	45	24	3612	16	5	24	21	245	669	360	387	926	303	377	285	739	979	1187	4	747	151	150	19
1484	Bacteria	NA	Firmicutes	Bacilli	Lactobacillales	Lactobacillaceae	Lactobacillus	Lactobacillus iners	60	6	0	6	44	62	54	25	5	3	6	39	16	6	0	2	72	150	227	18	413	165	145	11	18	23	222	17	37	38	88	12
1485	Bacteria	NA	Cyanobacteria	NA	Chroococcales	NA	Candidatus Atelocyanobacterium	Candidatus Atelocyanobacterium thalassa	0	0	0	0	0	1	1	0	0	0	0	0	0	0	0	0	0	0	0	0	0	0	0	0	0	0	1	0	0	0	0	0
1486	Bacteria	NA	Firmicutes	Bacilli	Bacillales	Bacillaceae	Bacillus	Bacillus thuringiensis	0	0	0	0	0	0	0	1	0	0	0	0	0	0	0	0	0	0	0	0	0	0	9	0	0	0	0	0	0	0	0	0
1487	Bacteria	NA	Firmicutes	Bacilli	Bacillales	Bacillaceae	Lysinibacillus	Lysinibacillus fusiformis	0	1	1	2	0	2	12	48	5	0	0	126	0	0	1	2	22	63	43	10	57	43	34	5	41	0	59	0	41	21	36	0
1488	Bacteria	NA	Proteobacteria	Gammaproteobacteria	Enterobacteriales	Enterobacteriaceae	Escherichia	Escherichia coli	2	3	2	0	0	0	1	9	19	0	4	28	3	1	8	23	39	5	6	6	7	3	3	4	13	0	8	6	5	0	2	167
1489	Bacteria	NA	Proteobacteria	Alphaproteobacteria	Rhodospirillales	Acetobacteraceae	Komagataeibacter	Komagataeibacter hansenii	12	48	416	93	7	30	13	57	15	31	967	39	59	320	61	9	97	290	9	914	1	26	49	104	181	75	13	236	31	108	32	22
1490	Bacteria	NA	Proteobacteria	Gammaproteobacteria	Enterobacteriales	Enterobacteriaceae	Erwinia	Erwinia amylovora	0	0	0	0	0	0	0	0	0	0	0	0	1	0	1	2	4	0	0	17	9	2	1	3	1	0	4	0	8	2	1	0
1491	Bacteria	NA	Proteobacteria	Gammaproteobacteria	Enterobacteriales	Enterobacteriaceae	Enterobacter	Enterobacter cloacae	37	58	195	36	2	23	7	56	8	4	3961	48	48	199	10	0	80	273	7	9008	11	16	40	688	81	778	31	109	27	64	81	76
1492	Bacteria	NA	Chlamydiae	Chlamydiia	Chlamydiales	Waddliaceae	Waddlia	Waddlia chondrophila	0	0	0	0	0	0	0	0	0	0	0	0	0	0	0	0	1	0	1	0	0	0	0	0	0	0	0	0	1	0	0	0
1493	Bacteria	NA	Proteobacteria	Gammaproteobacteria	Enterobacteriales	Enterobacteriaceae	Edwardsiella	Edwardsiella tarda	13	12	11	16	4	5	16	35	0	1	76	8	8	32	17	10	14	36	0	40	17	16	23	5	9	3	72	16	18	31	13	19
1494	Bacteria	NA	Tenericutes	Mollicutes	Mycoplasmatales	Mycoplasmataceae	Mycoplasma	Mycoplasma pneumoniae	0	0	0	2	0	0	0	0	0	0	0	6	0	0	0	0	0	0	0	0	0	0	11	0	1	0	0	0	0	0	0	0
1495	Viruses	NA	NA	NA	Caudovirales	Siphoviridae	NA	Streptococcus phage Sfi19	0	3	2	0	8	27	0	0	38	0	0	327	0	0	0	0	0	0	0	0	28	3	0	1	0	0	443	0	0	13	0	5
1496	Bacteria	NA	Proteobacteria	Betaproteobacteria	Burkholderiales	Alcaligenaceae	Achromobacter	Achromobacter piechaudii	6	10	14	3	2	2	15	12	2	2	21	5	5	13	4	4	11	15	9	33	19	12	9	4	9	3	29	18	8	11	7	5
1497	Bacteria	NA	Cyanobacteria	NA	Prochlorales	Prochlorococcaceae	Prochlorococcus	Prochlorococcus marinus	0	0	0	0	1	0	0	0	0	0	0	1	0	0	0	0	1	0	0	0	1	4	1	0	0	0	0	0	0	2	0	0
1498	Bacteria	NA	Cyanobacteria	NA	Prochlorales	Prochlorococcaceae	Prochlorococcus	Prochlorococcus marinus	1	0	0	0	0	0	0	0	0	0	0	0	0	0	0	0	1	0	0	0	3	3	0	0	1	0	2	0	0	0	0	0
1499	Bacteria	NA	Tenericutes	Mollicutes	Mycoplasmatales	Mycoplasmataceae	Mycoplasma	Mycoplasma alligatoris	0	0	0	0	1	0	0	0	0	0	0	0	0	0	0	0	0	1	0	1	0	0	0	0	0	0	0	0	0	0	0	0
1500	Bacteria	NA	Firmicutes	Bacilli	Lactobacillales	Lactobacillaceae	Lactobacillus	Lactobacillus crispatus	29017	2	0	0	2	1	89	390	6	0	18	760	1	2	6	0	9	5	4	5	2	10	2	684	4	19	12	2	12	23	4	1
1501	Bacteria	NA	Firmicutes	Clostridia	Clostridiales	Clostridiaceae	Clostridium	Clostridium ljungdahlii	1	2	0	1	0	2	0	1	0	0	0	3	0	0	0	0	4	6	13	0	3	5	9	7	1	0	3	0	5	3	4	0
1502	Bacteria	NA	Proteobacteria	Gammaproteobacteria	Pseudomonadales	Moraxellaceae	Moraxella	Moraxella catarrhalis	0	6	6	4	0	0	1	7	1	3	5	11	19	1	1	108	602	6	32	4	4	5	2	1	1	0	17	4	5	43	4	1
1503	Bacteria	NA	Firmicutes	Bacilli	Lactobacillales	Enterococcaceae	Enterococcus	Enterococcus faecalis	0	0	0	0	0	0	2	0	0	0	0	0	0	0	0	0	2	0	1	1	2	1	0	0	1	0	1	0	1	0	1	0
1504	Bacteria	NA	Firmicutes	Bacilli	Lactobacillales	Enterococcaceae	Enterococcus	Enterococcus faecalis	0	5	0	17	68	4	18	83	8	0	1	4	0	0	0	0	5	7	5	0	10	7	2	0	16	0	5	0	11	2	3	0
1505	Bacteria	NA	Firmicutes	Bacilli	Lactobacillales	Enterococcaceae	Enterococcus	Enterococcus faecalis	0	0	0	0	1	0	0	0	0	8	0	1	0	0	0	0	0	1	0	0	0	0	0	0	1	0	6	0	3	1	0	0
1506	Bacteria	NA	Firmicutes	Bacilli	Lactobacillales	Enterococcaceae	Enterococcus	Enterococcus faecalis	0	0	0	0	0	0	1	7	0	0	0	16	0	0	0	0	3	4	2	0	5	1	0	0	3	0	4	0	10	0	5	0
1507	Bacteria	NA	Firmicutes	Bacilli	Lactobacillales	Enterococcaceae	Enterococcus	Enterococcus faecalis	0	0	0	0	0	0	0	0	0	0	0	0	0	0	0	0	1	1	2	0	0	4	0	1	1	0	0	0	1	1	1	0
1508	Bacteria	NA	Firmicutes	Bacilli	Lactobacillales	Enterococcaceae	Enterococcus	Enterococcus faecalis	0	0	0	2	0	2	4	1	0	0	0	9	0	0	1	0	2	7	0	0	9	4	2	0	0	0	27	0	6	1	1	0
1509	Bacteria	NA	Proteobacteria	Gammaproteobacteria	Enterobacteriales	Enterobacteriaceae	Escherichia	Escherichia coli	0	1	0	0	0	1	0	1	0	0	5	0	0	0	0	0	4	1	0	9	1	1	1	1	0	1	1	1	0	0	0	0
1510	Bacteria	NA	Proteobacteria	Gammaproteobacteria	Enterobacteriales	Enterobacteriaceae	Escherichia	Escherichia coli	28	8	10	22	3	4	11	21	2	3	5	6	4	12	23	2	4	1	1	21	1	2	3	5	2	0	18	17	4	4	2	2
1511	Bacteria	NA	Proteobacteria	Gammaproteobacteria	Enterobacteriales	Enterobacteriaceae	Escherichia	Escherichia coli	0	1	1	0	0	0	0	3	0	3	5	3	0	3	0	1	5	3	0	5	1	1	6	0	0	1	4	1	2	1	0	3
1512	Bacteria	NA	Proteobacteria	Gammaproteobacteria	Enterobacteriales	Enterobacteriaceae	Escherichia	Escherichia coli	1	3	0	0	0	0	0	7	0	2	8	8	0	1	0	0	2	3	0	7	0	2	2	0	0	0	12	5	4	0	1	0
1513	Bacteria	NA	Proteobacteria	Gammaproteobacteria	Enterobacteriales	Enterobacteriaceae	Escherichia	Escherichia coli	6	12	18	11	5	3	0	14	2	1	19	17	4	23	11	3	7	20	5	12	1	5	3	5	5	2	57	12	12	11	3	15
1514	Bacteria	NA	Proteobacteria	Gammaproteobacteria	Enterobacteriales	Enterobacteriaceae	Escherichia	Escherichia coli	7	10	5	2	1	1	7	2	1	0	107	6	7	3	1	0	5	9	2	224	0	9	1	13	3	27	6	5	2	8	3	17
1515	Bacteria	NA	Proteobacteria	Gammaproteobacteria	Enterobacteriales	Enterobacteriaceae	Escherichia	Escherichia coli	1	9	7	37	1	2	14	19	0	2	26	15	9	14	4	7	9	0	1	46	2	8	10	7	7	2	43	29	11	5	0	11
1516	Bacteria	NA	Proteobacteria	Gammaproteobacteria	Enterobacteriales	Enterobacteriaceae	Escherichia	Escherichia coli	14	10	6	3	9	5	4	11	3	6	24	25	10	20	11	11	9	9	4	71	1	1	3	8	2	8	33	32	11	1	1	10
1517	Bacteria	NA	Proteobacteria	Gammaproteobacteria	Enterobacteriales	Enterobacteriaceae	Escherichia	Escherichia coli	0	1	1	0	0	0	0	0	0	0	0	0	1	0	0	0	0	1	0	4	0	0	1	1	0	0	0	0	1	0	0	0
1518	Bacteria	NA	Proteobacteria	Gammaproteobacteria	Enterobacteriales	Enterobacteriaceae	Escherichia	Escherichia coli	2	0	23	8	0	1	0	2	1	0	54	1	2	13	5	1	10	31	1	76	0	2	6	8	18	6	1	30	9	8	0	2
1519	Bacteria	NA	Proteobacteria	Gammaproteobacteria	Enterobacteriales	Enterobacteriaceae	Escherichia	Escherichia coli	0	0	0	0	0	0	1	0	0	0	3	0	0	0	0	0	0	1	0	2	0	1	0	0	0	0	0	1	0	2	0	0
1520	Bacteria	NA	Proteobacteria	Gammaproteobacteria	Enterobacteriales	Enterobacteriaceae	Escherichia	Escherichia coli	34	82	66	82	19	17	55	192	25	29	100	87	36	201	102	42	49	96	17	114	5	53	53	23	38	9	396	136	88	76	17	62
1521	Bacteria	NA	Proteobacteria	Gammaproteobacteria	Enterobacteriales	Enterobacteriaceae	Escherichia	Escherichia coli	2	14	8	10	4	0	4	17	0	0	16	6	4	10	3	6	2	9	2	8	0	0	0	0	4	1	24	2	6	0	1	1
1522	Bacteria	NA	Proteobacteria	Gammaproteobacteria	Enterobacteriales	Enterobacteriaceae	Escherichia	Escherichia coli	0	0	0	0	1	0	0	0	0	0	1	0	0	0	0	0	0	0	0	1	0	0	1	0	0	0	0	0	0	0	0	0
1523	Bacteria	NA	Proteobacteria	Gammaproteobacteria	Enterobacteriales	Enterobacteriaceae	Escherichia	Escherichia coli	0	0	0	0	0	0	0	0	0	0	3	1	0	0	0	0	0	0	0	7	1	0	1	1	0	0	0	0	0	0	0	0
1524	Bacteria	NA	Actinobacteria	Actinobacteria	Actinomycetales	Pseudonocardiaceae	Amycolatopsis	Amycolatopsis mediterranei	0	10	1	8	5	15	163	23	35	0	11	70	0	2	0	7	31	26	27	17	29	82	35	7	108	23	15	2	6	30	7	2
1525	Bacteria	NA	Bacteroidetes	Bacteroidia	Bacteroidales	Prevotellaceae	Prevotella	Prevotella bryantii	55	21	1	149	165	59	490	1425	30	9	19	4421	11	45	2	33	549	941	13064	223	4783	4639	4115	335	320	155	1846	15	777	3577	1462	242
1526	Bacteria	NA	Proteobacteria	Betaproteobacteria	Burkholderiales	NA	Thiomonas	Thiomonas intermedia	2	1	2	2	0	3	7	3	0	0	4	1	1	4	0	0	2	3	9	3	5	5	2	1	1	3	7	2	3	2	1	0
1527	Bacteria	NA	Actinobacteria	Actinobacteria	Actinomycetales	Propionibacteriaceae	Propionibacterium	Propionibacterium freudenreichii	1	54	132	37	16	118	1285	105	87	0	12	20	5	4	0	3	49	90	118	27	69	95	191	19	189	26	18	5	8	40	30	1
1528	Bacteria	NA	Proteobacteria	Betaproteobacteria	Burkholderiales	Oxalobacteraceae	Herbaspirillum	Herbaspirillum seropedicae	4	3	5	1	4	0	45	92	2	0	7	7	2	4	2	3	5	13	5	17	14	20	5	2	9	1	16	4	5	8	1	0
1529	Bacteria	NA	Actinobacteria	Actinobacteria	Bifidobacteriales	Bifidobacteriaceae	Bifidobacterium	Bifidobacterium longum	8	8	47	508	7	19	206	193	119	135	4	28	2	4	0	0	31	106	578	211	42140	160	164	2	47	17	11	14	19	142	81	0
1530	Bacteria	NA	Chlamydiae	Chlamydiia	Chlamydiales	Chlamydiaceae	Chlamydia	Chlamydia trachomatis	0	0	0	0	0	0	0	0	0	0	0	0	0	0	0	0	0	0	0	0	0	0	0	0	0	0	0	5	0	0	0	0
1531	Bacteria	NA	Chlamydiae	Chlamydiia	Chlamydiales	Chlamydiaceae	Chlamydia	Chlamydia trachomatis	0	0	0	0	0	0	0	0	0	0	0	0	0	0	0	0	0	0	0	0	0	0	0	0	0	0	0	5	0	0	0	0
1532	Bacteria	NA	Spirochaetes	Spirochaetia	Spirochaetales	Brachyspiraceae	Brachyspira	Brachyspira pilosicoli	0	0	0	0	0	0	0	4	0	0	0	16	0	0	0	0	3	2	3	1	7	4	1	1	1	0	2	0	3	4	1	0
1533	Bacteria	NA	Proteobacteria	Betaproteobacteria	Rhodocyclales	Rhodocyclaceae	Aromatoleum	Aromatoleum aromaticum	2	1	2	1	0	0	4	1	0	0	5	2	0	5	4	2	13	10	18	8	14	5	1	2	3	1	1	1	0	6	1	0
1534	Bacteria	NA	Bacteroidetes	NA	Bacteroidetes Order II. Incertae sedis	Rhodothermaceae	Salinibacter	Salinibacter ruber	0	0	0	1	1	2	2	2	0	0	0	1	3	0	0	0	1	2	0	0	0	0	1	0	0	0	0	0	1	4	0	0
1535	Bacteria	NA	Firmicutes	Bacilli	Lactobacillales	Leuconostocaceae	Leuconostoc	Leuconostoc kimchii	17	0	0	1	0	0	5	25	2	0	21	43	0	0	0	0	1	6	43	29	39	15	29	1	4	4	26	0	30	12	6	1
1536	Bacteria	NA	Firmicutes	Bacilli	Lactobacillales	Leuconostocaceae	Leuconostoc	Leuconostoc gasicomitatum	0	0	0	0	3	0	6	7	0	0	1	26	0	0	1	0	10	15	3	1	33	13	5	0	3	0	2	1	2	0	0	0
1537	Bacteria	NA	Firmicutes	Bacilli	Bacillales	Staphylococcaceae	Staphylococcus	Staphylococcus aureus	0	0	0	0	0	0	0	0	0	0	0	1	0	0	0	0	0	0	0	0	1	0	0	0	0	0	0	3	0	0	0	0
1538	Bacteria	NA	Actinobacteria	Actinobacteria	Actinomycetales	Corynebacteriaceae	Corynebacterium	Corynebacterium pseudotuberculosis	0	10	0	1	3	10	131	15	29	0	0	1	0	1	0	1	1	6	16	0	154	6	14	2	15	0	4	1	5	2	1	2
1408	Bacteria	NA	Proteobacteria	Gammaproteobacteria	Pseudomonadales	Pseudomonadaceae	Pseudomonas	Pseudomonas syringae group genomosp. 3	0	0	0	0	0	0	0	0	0	0	4	0	0	0	0	0	0	0	0	0	0	0	0	0	0	0	0	0	0	0	0	0
1540	Bacteria	NA	Firmicutes	Clostridia	Clostridiales	Clostridiales Family XI. Incertae Sedis	Finegoldia	Finegoldia magna	0	3	2	27	20	6	41	42	4	1	2	1038	4	0	0	3	155	405	973	80	743	1834	1047	22	29	127	468	30	389	413	55	190
1541	Bacteria	NA	Firmicutes	Clostridia	Clostridiales	Clostridiales Family XI. Incertae Sedis	Peptoniphilus	Peptoniphilus sp. oral taxon 836	5	15	5	37	78	154	68	97	33	12	5	988	4	3	18	8	362	1574	1138	311	1861	10998	343	1009	260	12434	1162	21	1266	479	1420	242
1542	Bacteria	NA	Firmicutes	Bacilli	Lactobacillales	Lactobacillaceae	Lactobacillus	Lactobacillus salivarius	75	25	15	85	218	321	3711	88	356	84	34	132	33	4	19	32	31	102	183	61	403	111	66	25	138	164	44	9	78	35	38	15
1543	Bacteria	NA	Proteobacteria	Alphaproteobacteria	Rhizobiales	Xanthobacteraceae	Xanthobacter	Xanthobacter autotrophicus	20	79	247	103	19	33	91	95	33	27	774	28	34	311	45	5	174	549	43	799	12	52	73	89	214	82	36	284	53	158	67	38
1544	Bacteria	NA	Firmicutes	Bacilli	Lactobacillales	Lactobacillaceae	Lactobacillus	Lactobacillus delbrueckii	0	0	0	0	1	3	1	6	0	1	0	16	0	0	0	0	5	11	5	0	6	5	1	3	0	0	7	0	5	1	3	0
1545	Viruses	NA	NA	NA	Caudovirales	Siphoviridae	NA	Streptococcus phage Sfi11	0	0	0	13	0	0	1	0	0	0	0	734	0	0	0	0	0	0	0	0	1	0	0	0	4	0	0	0	0	0	0	0
1546	Bacteria	NA	Firmicutes	Bacilli	Lactobacillales	Enterococcaceae	Enterococcus	Enterococcus faecium	3	1	61	2	2	4	16	24	4	1	0	50	0	1	2	1	9	28	17	6	25	22	5	2	9	1	46	0	24	4	14	2
1547	Bacteria	NA	Firmicutes	Bacilli	Lactobacillales	Enterococcaceae	Enterococcus	Enterococcus faecalis	0	0	0	0	0	0	2	0	0	0	0	0	0	0	0	0	0	1	0	1	2	1	0	0	1	0	1	0	0	0	0	0
1548	Archaea	NA	Euryarchaeota	Halobacteria	Halobacteriales	Halobacteriaceae	Halalkalicoccus	Halalkalicoccus jeotgali	0	0	0	0	1	1	2	1	0	0	0	0	0	0	0	0	1	3	1	0	2	0	0	0	0	0	1	0	0	0	0	0
1549	Viruses	NA	NA	NA	Caudovirales	Siphoviridae	NA	Lactococcus phage 936 sensu lato	0	0	0	0	0	0	0	1	0	0	0	0	0	0	0	0	0	0	0	0	0	0	0	0	0	0	0	0	0	0	0	0
1550	Bacteria	NA	Cyanobacteria	NA	Chroococcales	NA	Synechococcus	Synechococcus sp. WH 8102	0	2	0	0	0	0	1	0	0	0	0	0	0	0	0	0	0	0	0	0	0	0	0	0	0	0	2	0	0	0	0	0
1551	Viruses	NA	NA	NA	Caudovirales	Siphoviridae	NA	Streptococcus phage O1205	0	0	3	0	1	0	0	0	0	0	0	161	0	1	0	0	6	0	1	0	2	18	7	8	12	0	560	3	0	0	0	0
1552	Bacteria	NA	Proteobacteria	Betaproteobacteria	Rhodocyclales	Rhodocyclaceae	Thauera	Thauera sp. MZ1T	4	9	106	63	7	13	35	10	3	4	373	26	6	65	13	1	52	107	47	399	24	64	35	21	25	17	41	53	27	49	30	15
1553	Bacteria	NA	Proteobacteria	Betaproteobacteria	Burkholderiales	Burkholderiaceae	Ralstonia	Ralstonia solanacearum	0	2	6	0	0	0	12	7	0	0	13	1	6	18	0	3	4	11	10	7	8	3	4	2	1	1	4	3	3	4	1	1
1554	Bacteria	NA	Proteobacteria	Betaproteobacteria	Burkholderiales	Burkholderiaceae	Ralstonia	Ralstonia solanacearum	0	4	1	3	3	0	9	4	0	0	8	0	1	5	0	0	0	6	4	3	5	13	13	0	2	1	1	2	2	3	0	0
1555	Bacteria	NA	Actinobacteria	Actinobacteria	Actinomycetales	Corynebacteriaceae	Corynebacterium	Corynebacterium accolens	3	39	6	23	7	71	120	153	39	5	8	4	5	85	6	127	24	86	66	11	35	65	80	10	42	6	48	10	8	59	21	9
1556	Bacteria	NA	Proteobacteria	Betaproteobacteria	Neisseriales	Neisseriaceae	Neisseria	Neisseria meningitidis	0	21	460	3	6	4	913	4	92	52	2	23	5125	31	490	222	80612	72	44	0	2040	8	336	16	9	0	3503	24	2388	62	2	36
1557	Bacteria	NA	Firmicutes	Bacilli	Lactobacillales	Lactobacillaceae	Pediococcus	Pediococcus acidilactici	2	0	8	0	3	0	1	5	0	0	0	22	0	1	1	5	3	6	3	0	1	2	2	3	2	1	5	0	2	0	5	0
1558	Bacteria	NA	Bacteroidetes	Bacteroidia	Bacteroidales	Prevotellaceae	Prevotella	Prevotella marshii	1294	1023	7	2584	1486	4099	4473	3104	1013	699	274	37349	349	650	313	866	17406	32778	142835	1207	114508	63612	98745	3655	4150	10713	35201	366	10019	107399	12634	8665
1559	Bacteria	NA	Firmicutes	Bacilli	Bacillales	Staphylococcaceae	Staphylococcus	Staphylococcus aureus	0	0	0	0	0	0	0	0	0	0	0	134	0	0	4	1	31	70	21	18	109	93	0	8	0	4	100	0	0	0	0	7
1560	Bacteria	NA	Firmicutes	Clostridia	Clostridiales	Clostridiales Family XI. Incertae Sedis	Peptoniphilus	Peptoniphilus duerdenii	1	18	18	124	106	72	256	237	41	61	45	149	120	11	11	75	1354	2965	3096	179	4777	2812	6778	323	283	2978	1820	56	1237	2110	1368	509
1561	Bacteria	NA	Bacteroidetes	Bacteroidia	Bacteroidales	Bacteroidaceae	Bacteroides	Bacteroides fragilis	35	17	0	20	131	153	135	18	10	54	21	6	1	2	1	23	9	6	440	12	703	57	62	27	8	218	71	4	25	249	58	252
1562	Bacteria	NA	Firmicutes	Negativicutes	Selenomonadales	Veillonellaceae	Selenomonas	Selenomonas sp. oral taxon 149	1224	703	10	1758	188	721	4404	1038	632	112	370	2601	157	3419	57	35	35000	11209	182734	555	180803	48669	23963	755	2171	457	8379	118	8776	167102	3244	1525
1563	Bacteria	NA	Firmicutes	Clostridia	Clostridiales	Peptostreptococcaceae	NA	[Eubacterium] yurii	1	16	2	6	93	83	130	93	65	8	3	861	11	9	5	102	541	1018	1866	77	1714	1966	656	1278	205	59	5542	126	2078	606	666	364
1564	Bacteria	NA	Proteobacteria	Epsilonproteobacteria	Campylobacterales	Campylobacteraceae	Campylobacter	Campylobacter coli	0	0	0	0	0	0	0	0	0	0	0	0	0	0	0	0	0	1	0	0	0	0	0	0	0	0	0	0	1	3	0	0
1565	Bacteria	NA	Firmicutes	Bacilli	Lactobacillales	Streptococcaceae	Streptococcus	Streptococcus mitis	23	6281	6984	10107	46141	58213	389921	31649	14556	36537	6879	10376	2295	988	11936	8234	14708	51983	23684	3771	145991	26306	38898	2210	11384	1689	113653	2722	89559	7399	40412	3912
1566	Bacteria	NA	Firmicutes	Bacilli	Lactobacillales	Streptococcaceae	Streptococcus	Streptococcus pyogenes	8	1	4	25	39	75	212	391	33	53	1	115	0	1	5	13	138	60	103	25	237	40	36	17	46	9	583	3	46	11	126	38
1567	Bacteria	NA	Firmicutes	Bacilli	Lactobacillales	Streptococcaceae	Streptococcus	Streptococcus equinus	1	4	26	115	91	52	387	232	43	68	13	2583	10	0	19	13	130	1065	242	144	654	342	208	192	287	46	350	2	402	83	127	7
1568	Bacteria	NA	Firmicutes	Bacilli	Lactobacillales	Streptococcaceae	Streptococcus	Streptococcus sp. oral taxon 071	74	23035	6086	12532	115017	101136	763832	124314	51672	82173	5171	44038	2346	1088	7124	13305	30732	106123	89268	13618	150259	62313	72631	8097	65361	8386	194661	1639	76774	14318	67021	4995
1569	Bacteria	NA	Actinobacteria	Actinobacteria	Bifidobacteriales	Bifidobacteriaceae	Bifidobacterium	Bifidobacterium dentium	6976	34	0	2	5	223	1356	1	10	8	0	1641	0	62	0	0	2	3	12	0	44	2	202	184	1272	0	0	0	25	21	1	0
1570	Bacteria	NA	Actinobacteria	Actinobacteria	Actinomycetales	Actinomycetaceae	Mobiluncus	Mobiluncus mulieris	0	2	0	3	0	2	28	4	7	0	0	3	1	3	0	0	3	28	74	2	23	15	186	0	33	2	5	1	3	200	7	0
1571	Bacteria	NA	Proteobacteria	Gammaproteobacteria	Alteromonadales	Pseudoalteromonadaceae	Pseudoalteromonas	Pseudoalteromonas tunicata	0	1	1	1	3	0	6	0	0	0	0	5	4	2	0	3	13	11	5	3	17	3	22	0	5	1	31	4	103	3	9	2
1572	Bacteria	NA	Proteobacteria	Deltaproteobacteria	Desulfovibrionales	Desulfovibrionaceae	Desulfovibrio	Desulfovibrio vulgaris	0	0	0	0	1	0	3	1	0	0	0	1	1	0	0	1	3	8	0	1	0	0	2	0	0	0	6	0	0	3	0	2
1573	Bacteria	NA	Proteobacteria	Deltaproteobacteria	NA	NA	NA	delta proteobacterium NaphS2	0	1	0	0	0	0	1	0	0	0	0	0	0	0	0	0	0	3	2	1	0	0	2	0	0	0	0	0	0	0	0	0
1574	Bacteria	NA	Proteobacteria	Gammaproteobacteria	Enterobacteriales	Enterobacteriaceae	Salmonella	Salmonella enterica	1	1	0	0	0	0	0	0	0	0	44	0	0	1	0	0	0	0	4	137	4	1	0	22	0	10	7	0	15	3	2	4
1575	Bacteria	NA	Proteobacteria	Deltaproteobacteria	Desulfovibrionales	Desulfovibrionaceae	Desulfovibrio	Desulfovibrio vulgaris	1	0	0	1	1	1	4	3	0	0	2	3	0	2	0	1	3	8	6	2	10	4	1	0	3	1	5	0	1	1	2	0
1576	Viruses	NA	NA	NA	Caudovirales	Siphoviridae	NA	Streptococcus phage DT1	0	0	0	0	0	38	0	0	17	0	0	2	0	3	0	0	0	1	0	0	2	9	0	1	0	0	33	1	0	3	0	2
1577	Bacteria	NA	Cyanobacteria	NA	Chroococcales	NA	Synechococcus	Synechococcus sp. PCC 7335	0	0	0	0	0	0	0	0	0	0	0	0	0	0	0	0	1	1	1	0	5	0	0	0	0	0	0	0	0	1	0	1
1578	Bacteria	NA	Proteobacteria	Epsilonproteobacteria	Campylobacterales	Helicobacteraceae	Sulfurimonas	Sulfurimonas gotlandica	0	0	0	0	0	0	0	0	0	0	0	6	0	0	0	0	4	3	2	1	4	3	0	0	2	0	0	0	3	2	0	0
1579	Bacteria	NA	Cyanobacteria	NA	Prochlorales	Prochlorococcaceae	Prochlorococcus	Prochlorococcus marinus	0	0	1	0	0	0	1	0	0	0	0	0	0	0	0	0	0	0	1	0	0	1	4	0	0	0	3	1	0	0	0	0
1580	Bacteria	NA	Cyanobacteria	NA	Prochlorales	Prochlorococcaceae	Prochlorococcus	Prochlorococcus marinus	0	0	0	0	0	0	0	0	0	0	0	0	0	0	0	0	0	0	0	0	1	0	0	0	0	0	0	0	4	1	0	0
1581	Eukaryota	Fungi	Ascomycota	Dothideomycetes	Capnodiales	Capnodiaceae	Capnodium	Capnodium salicinum	0	0	0	0	0	0	0	0	0	0	6	0	0	0	0	0	0	0	0	0	0	0	0	0	0	0	0	0	0	0	0	0
1582	Bacteria	NA	Proteobacteria	Gammaproteobacteria	Alteromonadales	Shewanellaceae	Shewanella	Shewanella sp. ANA-3	0	1	10	10	4	4	1	2	8	0	20	8	3	9	4	1	26	23	17	28	4	5	3	5	1	8	67	5	12	7	2	4
1583	Bacteria	NA	Proteobacteria	Deltaproteobacteria	Desulfobacterales	Desulfobacteraceae	Desulfococcus	Desulfococcus oleovorans	0	1	0	0	2	1	6	0	0	0	0	0	0	2	0	0	0	2	0	0	0	2	0	0	0	0	1	1	0	1	0	0
1584	Bacteria	NA	Proteobacteria	Gammaproteobacteria	Enterobacteriales	Enterobacteriaceae	Salmonella	Salmonella enterica	0	0	1	0	0	1	0	0	0	0	2	0	0	0	0	1	0	0	0	7	3	0	0	3	0	0	1	0	0	0	0	6
1585	Eukaryota	NA	NA	NA	Kinetoplastida	Trypanosomatidae	Trypanosoma	Trypanosoma brucei	4	0	1	4	5	13	1	2	0	2	0	0	0	1	1	2	1	1	0	5	2	0	1	5	1	3	1	1	1	1	0	0
