# Supplementary material for: Composition, taxonomy and functional diversity of the oropharynx microbiome in individuals with schizophrenia and controls
Source: PeerJ. 2015 Aug 25;3:e1140. doi: 10.7717/peerj.1140 (PMC4556144; doi:10.7717/peerj.1140)
Supplement: File S3 — Spreadsheet with results from Phyloseq/DESeq2, STAMP, and MaAsLin analyses. [file peerj-03-1140-s005.xlsx]

## Sheet: PhyloSeq_DESeq2
baseMean	log2FoldChange	lfcSE	stat	pvalue	padj	Superkingdom	Kingdom	Phylum	Class	Order	Family	Genus	Species
2110.74	8.37332	1.17162	7.14678	8.8835e-13	2.55352e-10	Bacteria	NA	Firmicutes	Bacilli	Lactobacillales	Lactobacillaceae	Lactobacillus	Lactobacillus gasseri
609.716	6.80548	0.98986	6.87519	6.19063e-12	9.61095e-10	Bacteria	NA	Firmicutes	Erysipelotrichia	Erysipelotrichales	Erysipelotrichaceae	Catenibacterium	Catenibacterium mitsuokai
274.439	5.71272	1.28713	4.43835	9.06504e-06	0.000312744	Eukaryota	Fungi	Ascomycota	Saccharomycetes	Saccharomycetales	NA	Candida	Candida dubliniensis
230.986	4.82281	0.986532	4.88864	1.01533e-06	3.94073e-05	Bacteria	NA	Firmicutes	Clostridia	Clostridiales	Eubacteriaceae	Eubacterium	Eubacterium hallii
103.173	3.79319	1.05578	3.59279	0.000327156	0.00630046	Bacteria	NA	Actinobacteria	Actinobacteria	Bifidobacteriales	Bifidobacteriaceae	Bifidobacterium	Bifidobacterium pseudocatenulatum
994.76	2.9824	0.800541	3.72548	0.00019494	0.00417441	Bacteria	NA	Firmicutes	Bacilli	Lactobacillales	Lactobacillaceae	Lactobacillus	Lactobacillus salivarius
134.007	-3.29745	0.898813	-3.66867	0.000243816	0.00504699	Bacteria	NA	Proteobacteria	Gammaproteobacteria	Pasteurellales	Pasteurellaceae	Basfia	Mannheimia succiniciproducens
766.873	-3.50498	1.01767	-3.44412	0.000572932	0.00961868	Bacteria	NA	Proteobacteria	Gammaproteobacteria	Pasteurellales	Pasteurellaceae	Aggregatibacter	Aggregatibacter actinomycetemcomitans
7921.7	-3.57101	0.925852	-3.85699	0.00011479	0.00264017	Bacteria	NA	Proteobacteria	Gammaproteobacteria	Pasteurellales	Pasteurellaceae	Aggregatibacter	Aggregatibacter aphrophilus
2420.17	-3.57401	1.01282	-3.52878	0.000417488	0.00740742	Bacteria	NA	Bacteroidetes	Flavobacteriia	Flavobacteriales	Flavobacteriaceae	Capnocytophaga	Capnocytophaga sputigena
586.585	-3.88967	0.942825	-4.12555	3.69857e-05	0.00104401	Bacteria	NA	Proteobacteria	Gammaproteobacteria	Pasteurellales	Pasteurellaceae	Pasteurella	Pasteurella multocida
274.321	-4.1825	0.894436	-4.67612	2.92347e-06	0.000106793	Bacteria	NA	Proteobacteria	Gammaproteobacteria	Pasteurellales	Pasteurellaceae	Mannheimia	Mannheimia haemolytica
1660.38	-4.21454	1.06371	-3.96211	7.42898e-05	0.00177438	Bacteria	NA	Proteobacteria	Betaproteobacteria	Neisseriales	Neisseriaceae	Neisseria	Neisseria elongata
3826.07	-4.35436	1.00521	-4.33177	1.47917e-05	0.000447489	Bacteria	NA	Bacteroidetes	Flavobacteriia	Flavobacteriales	Flavobacteriaceae	Capnocytophaga	Capnocytophaga gingivalis
549.513	-4.69991	0.901066	-5.21595	1.82881e-07	8.11207e-06	Bacteria	NA	Proteobacteria	Gammaproteobacteria	Pasteurellales	Pasteurellaceae	Actinobacillus	Actinobacillus minor
3451.51	-4.92951	1.0052	-4.904	9.39063e-07	3.88772e-05	Bacteria	NA	Proteobacteria	Betaproteobacteria	Neisseriales	Neisseriaceae	Neisseria	Neisseria mucosa
749.792	-5.48719	0.968639	-5.66484	1.47162e-08	7.02982e-07	Bacteria	NA	Proteobacteria	Betaproteobacteria	Neisseriales	Neisseriaceae	Neisseria	Neisseria lactamica
932.423	-6.32706	0.976499	-6.47933	9.21311e-11	9.53557e-09	Bacteria	NA	Proteobacteria	Betaproteobacteria	Neisseriales	Neisseriaceae	Neisseria	Neisseria cinerea
3174.81	-6.34111	1.00556	-6.30606	2.86227e-10	2.22184e-08	Bacteria	NA	Proteobacteria	Betaproteobacteria	Neisseriales	Neisseriaceae	Neisseria	Neisseria sp. oral taxon 014
1471.65	-6.42164	1.0981	-5.84797	4.97614e-09	2.65045e-07	Bacteria	NA	Proteobacteria	Betaproteobacteria	Neisseriales	Neisseriaceae	Neisseria	Neisseria gonorrhoeae
46255.6	-6.50981	1.11409	-5.84317	5.12165e-09	2.65045e-07	Bacteria	NA	Proteobacteria	Betaproteobacteria	Neisseriales	Neisseriaceae	Neisseria	Neisseria flavescens
9257.95	-6.59475	1.03798	-6.35343	2.10566e-10	1.86802e-08	Bacteria	NA	Proteobacteria	Betaproteobacteria	Neisseriales	Neisseriaceae	Neisseria	Neisseria sicca
231197	-6.83841	1.15192	-5.93655	2.91077e-09	2.00843e-07	Bacteria	NA	Proteobacteria	Betaproteobacteria	Neisseriales	Neisseriaceae	Neisseria	Neisseria subflava
8112.2	-7.0137	1.0319	-6.79687	1.06919e-11	1.32794e-09	Bacteria	NA	Proteobacteria	Betaproteobacteria	Neisseriales	Neisseriaceae	Neisseria	Neisseria meningitidis
624.889	-7.93864	1.01297	-7.83701	4.61416e-15	2.86539e-12	Bacteria	NA	Proteobacteria	Betaproteobacteria	Neisseriales	Neisseriaceae	Neisseria	Neisseria polysaccharea

## Sheet: STAMP
Species	Control: mean rel. freq. (%)	Control: std. dev. (%)	Schizophrenia: mean rel. freq. (%)	Schizophrenia: std. dev. (%)	p-values (corrected)	Difference between means	95.0% lower CI	95.0% upper CI
Aggregatibacter_aphrophilus	0.537949	0.542423	0.11857	0.205038	0.0197053	0.41938	0.148486	0.728444
Fusobacterium_periodonticum	2.8328	3.4117	0.117541	0.266401	0.0197053	2.71526	1.19801	4.58904
Haemophilus_influenzae	0.668387	0.469061	0.186663	0.169069	0.0197053	0.481724	0.252792	0.731684
Neisseria_flavescens	3.01132	3.41675	0.139331	0.365229	0.0197053	2.87199	1.22143	4.65656
Neisseria_meningitidis	0.584383	0.646281	0.0256457	0.0532047	0.0197053	0.558737	0.25107	0.889739
Neisseria_sicca	0.643063	0.79901	0.0480836	0.096647	0.0197053	0.59498	0.249224	1.02704
Neisseria_sp._oral_taxon_014	0.186072	0.1516	0.0357746	0.0784577	0.0410527	0.150297	0.0671251	0.232343
Neisseria_subflava	13.9598	15.6259	0.523199	1.734	0.0197053	13.4366	5.65278	21.8765
Streptococcus_gordonii	0.267941	0.262083	1.80064	2.53633	0.0358216	-1.5327	-2.87411	-0.47599
Streptococcus_sp._oral_taxon_071	0.894668	0.567355	2.88197	2.56245	0.0281504	-1.9873	-3.39885	-0.737501
Streptococcus_thermophilus	0.188445	0.177833	1.51638	1.63478	0.0197053	-1.32794	-2.18339	-0.563104

## Sheet: MaAsLin
Variable	Feature	Value	Coefficient	N	N.not.0	P.value	Q.value
age	Neisseria_subflava	age	0.0171041	32	32	0.000754049	0.072921
age	Neisseria_flavescens	age	0.00686811	32	32	0.00247518	0.136391
age	Neisseria_polysaccharea	age	0.000719208	32	30	0.00248889	0.136391
age	Escherichia_fergusonii	age	0.00020565	32	30	0.00298728	0.158422
age	Pseudomonas_protegens	age	-4.65804e-05	32	27	0.00245288	0.136391
cohort	Streptococcus_sp._oral_taxon_071	cohortSchizophrenia	0.0664451	32	32	0.00208183	0.131636
cohort	Micrococcus_luteus	cohortSchizophrenia	0.00624066	32	32	0.000373074	0.0487643
cohort	Bifidobacterium_pseudocatenulatum	cohortSchizophrenia	0.00431788	32	28	0.000385606	0.0487643
cohort	Propionibacterium_freudenreichii	cohortSchizophrenia	0.00355686	32	30	0.000812852	0.0742404
cohort	Kytococcus_sedentarius	cohortSchizophrenia	0.00352306	32	32	0.00354204	0.176458
cohort	Scardovia_inopinata	cohortSchizophrenia	0.00202356	32	29	0.00145932	0.102119
cohort	Bifidobacterium_breve	cohortSchizophrenia	0.00174806	32	30	0.00178318	0.117262
cohort	Streptococcus_phage_5093	cohortSchizophrenia	0.00153543	32	25	0.00347323	0.176458
cohort	Actinobacillus_succinogenes	cohortSchizophrenia	-0.0041851	32	30	0.000999902	0.082192
cohort	Mannheimia_succiniciproducens	cohortSchizophrenia	-0.00453328	32	30	0.00149078	0.102119
cohort	Haemophilus_ducreyi	cohortSchizophrenia	-0.0045533	32	27	7.67253e-06	0.00305382
cohort	Aggregatibacter_actinomycetemcomitans	cohortSchizophrenia	-0.00751073	32	31	0.00475392	0.211228
cohort	Pasteurella_multocida	cohortSchizophrenia	-0.00769505	32	31	0.000975161	0.082192
cohort	Mannheimia_haemolytica	cohortSchizophrenia	-0.00911159	32	31	4.82687e-05	0.00878436
cohort	Actinobacillus_minor	cohortSchizophrenia	-0.0103202	32	31	9.28779e-06	0.00305382
cohort	Neisseria_lactamica	cohortSchizophrenia	-0.0103605	32	32	0.000447054	0.0524969
cohort	Neisseria_polysaccharea	cohortSchizophrenia	-0.0150984	32	30	4.51617e-06	0.00305382
cohort	Neisseria_gonorrhoeae	cohortSchizophrenia	-0.0155131	32	30	0.00143372	0.102119
cohort	Neisseria_cinerea	cohortSchizophrenia	-0.017163	32	31	4.87767e-06	0.00305382
cohort	Neisseria_sp._oral_taxon_014	cohortSchizophrenia	-0.0275679	32	32	0.000119928	0.0179237
cohort	Aggregatibacter_aphrophilus	cohortSchizophrenia	-0.0341156	32	31	0.000484235	0.0530722
cohort	Neisseria_mucosa	cohortSchizophrenia	-0.0356011	32	32	0.00371489	0.179626
cohort	Haemophilus_influenzae	cohortSchizophrenia	-0.0367474	32	31	0.00106357	0.0832626
cohort	Neisseria_sicca	cohortSchizophrenia	-0.0453891	32	32	3.69352e-05	0.00867448
cohort	Neisseria_meningitidis	cohortSchizophrenia	-0.0545806	32	32	4.91931e-05	0.00878436
cohort	Neisseria_flavescens	cohortSchizophrenia	-0.12502	32	32	2.66862e-05	0.00731202
cohort	Neisseria_subflava	cohortSchizophrenia	-0.306674	32	32	7.09995e-06	0.00305382
race_white	Klebsiella_variicola	race_whiteYes	0.000851946	32	32	0.00434798	0.198558
race_white	Actinomyces_phage_Av-1	race_whiteYes	-0.000964395	32	13	0.00238194	0.136391
race_white	Streptococcus_sp._oral_taxon_071	race_whiteYes	-0.0642146	32	32	0.0041219	0.193612
smoke	Streptococcus_mitis	smokesmkr	0.237168	32	32	5.34329e-05	0.00878436
smoke	Streptococcus_pneumoniae	smokesmkr	0.130065	32	32	0.000520755	0.0535075
