# Supplementary material for: Composition, taxonomy and functional diversity of the oropharynx microbiome in individuals with schizophrenia and controls
Source: PubMed Central journal article supplement (PMC4556144; doi:10.7717/peerj.1140), 2015-08-25

**A****Alpha Diversity Measure**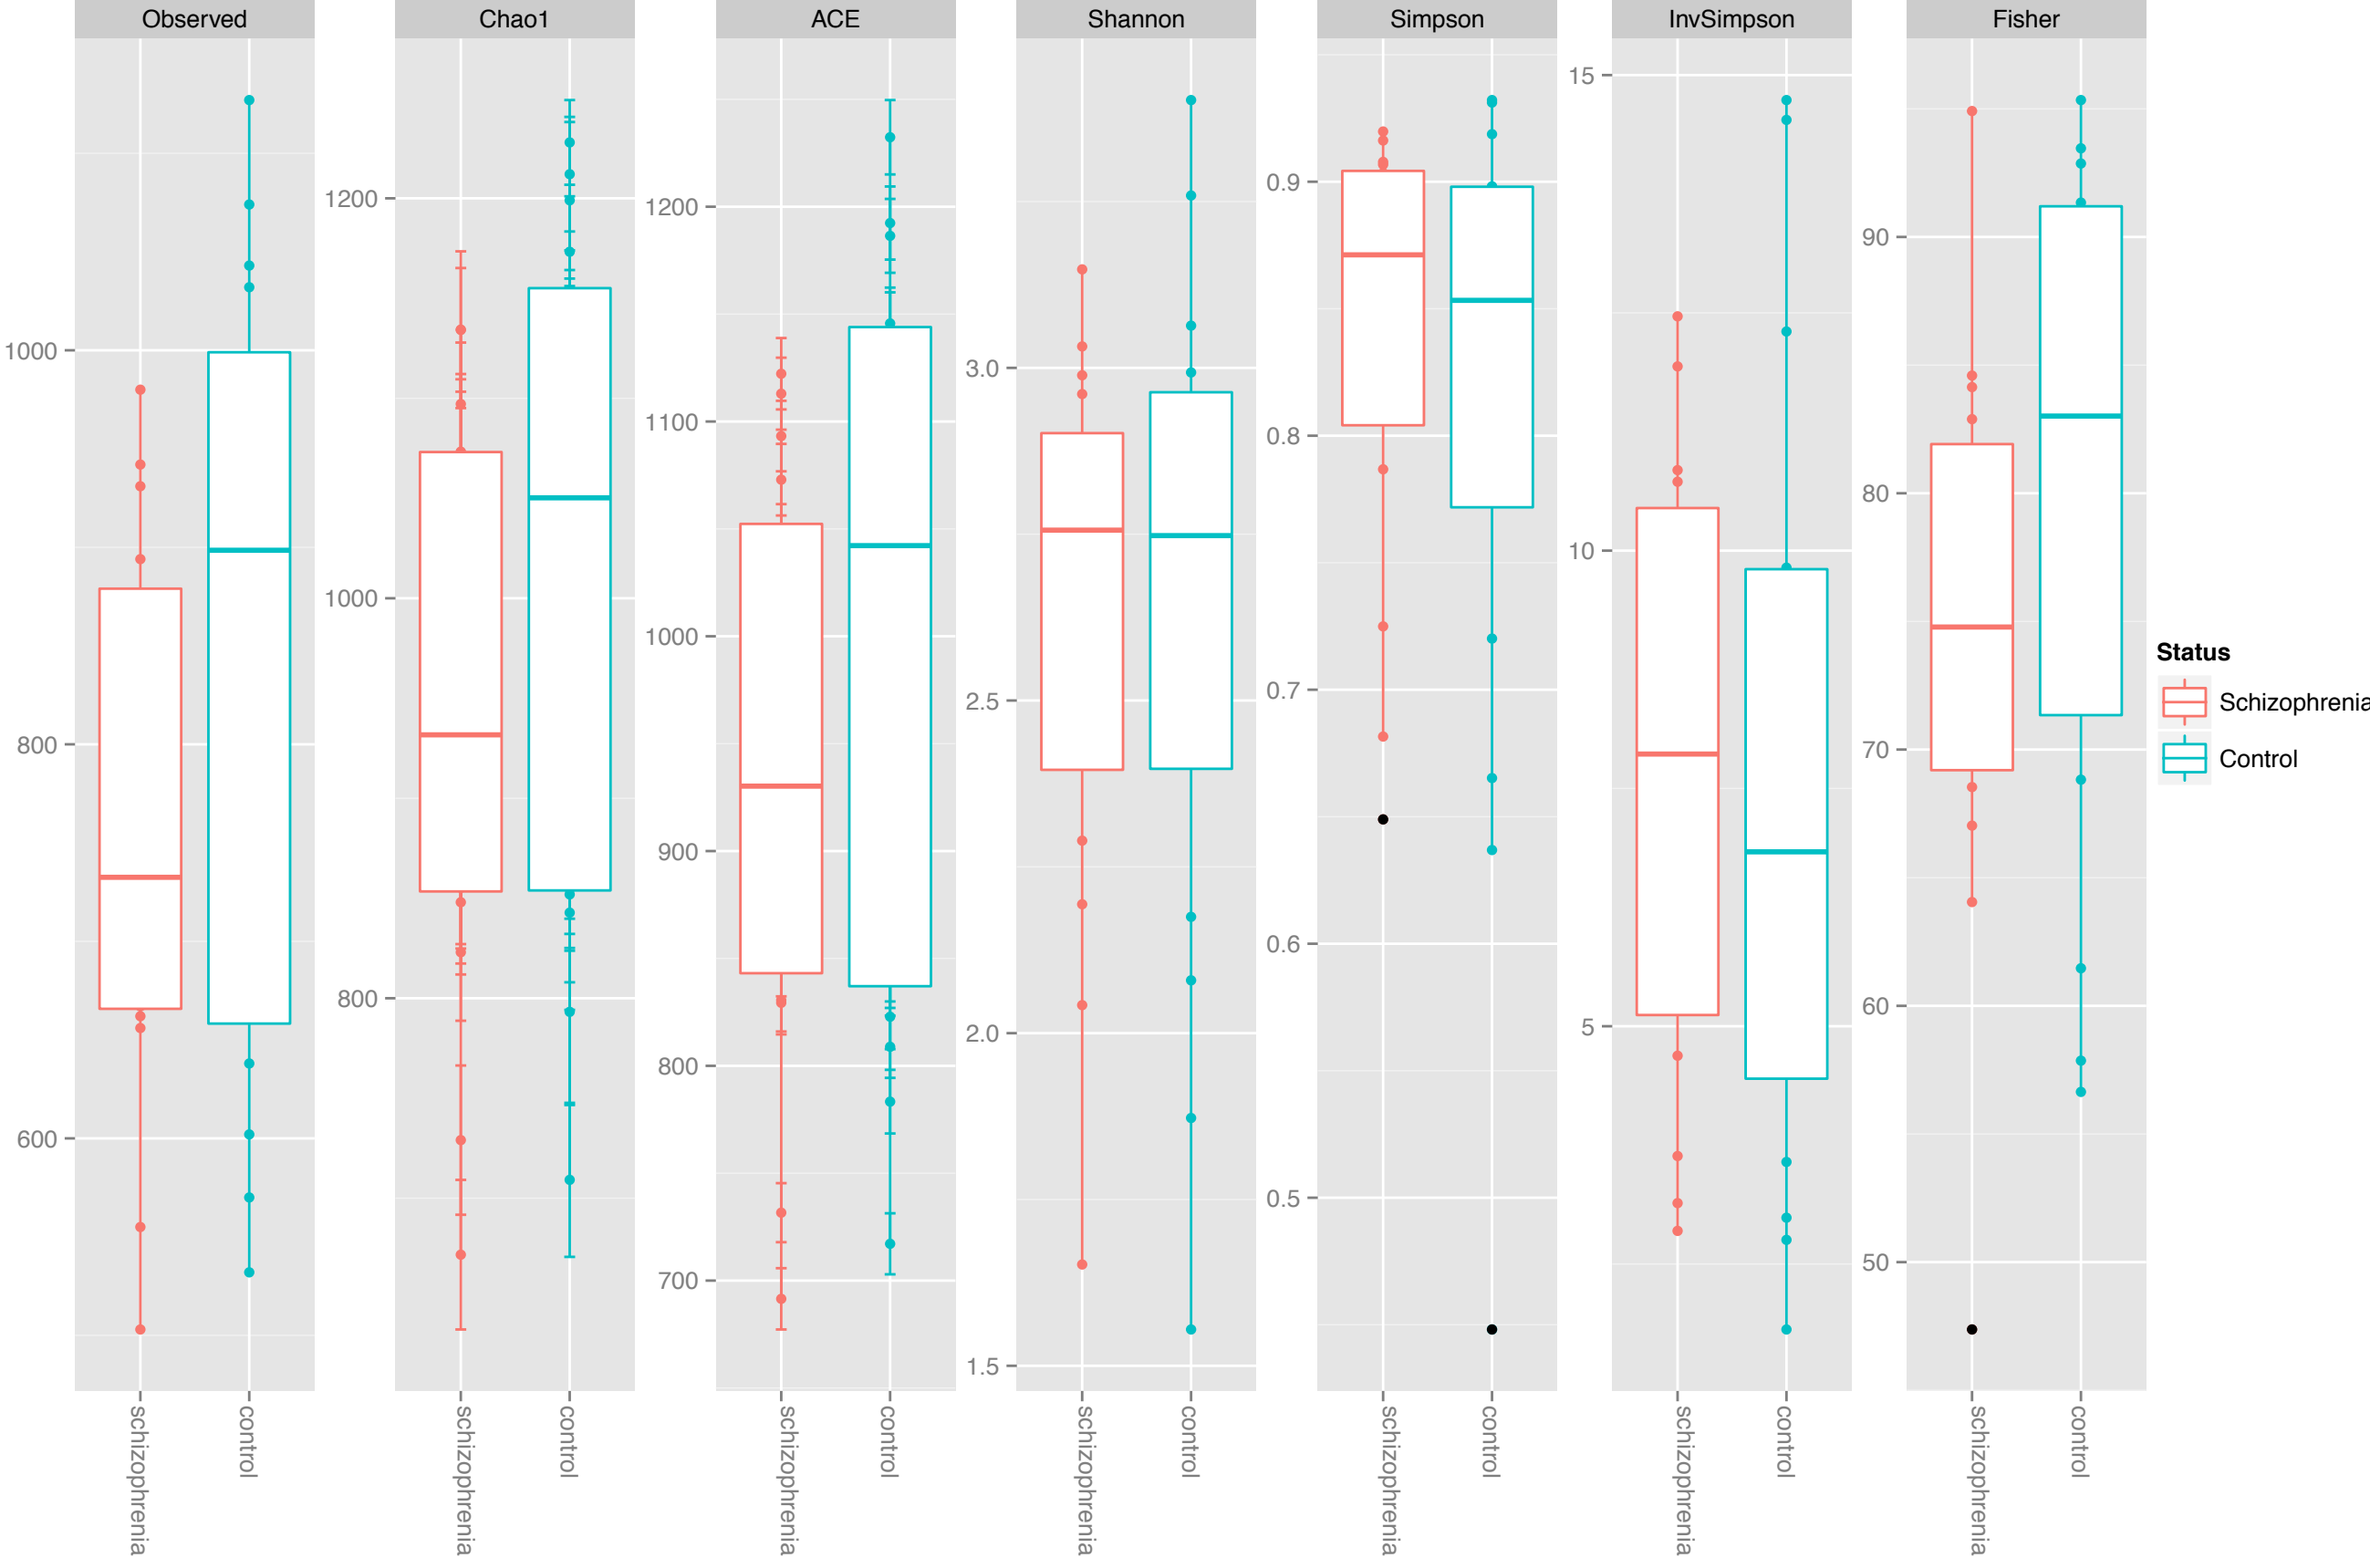**B****Phylum**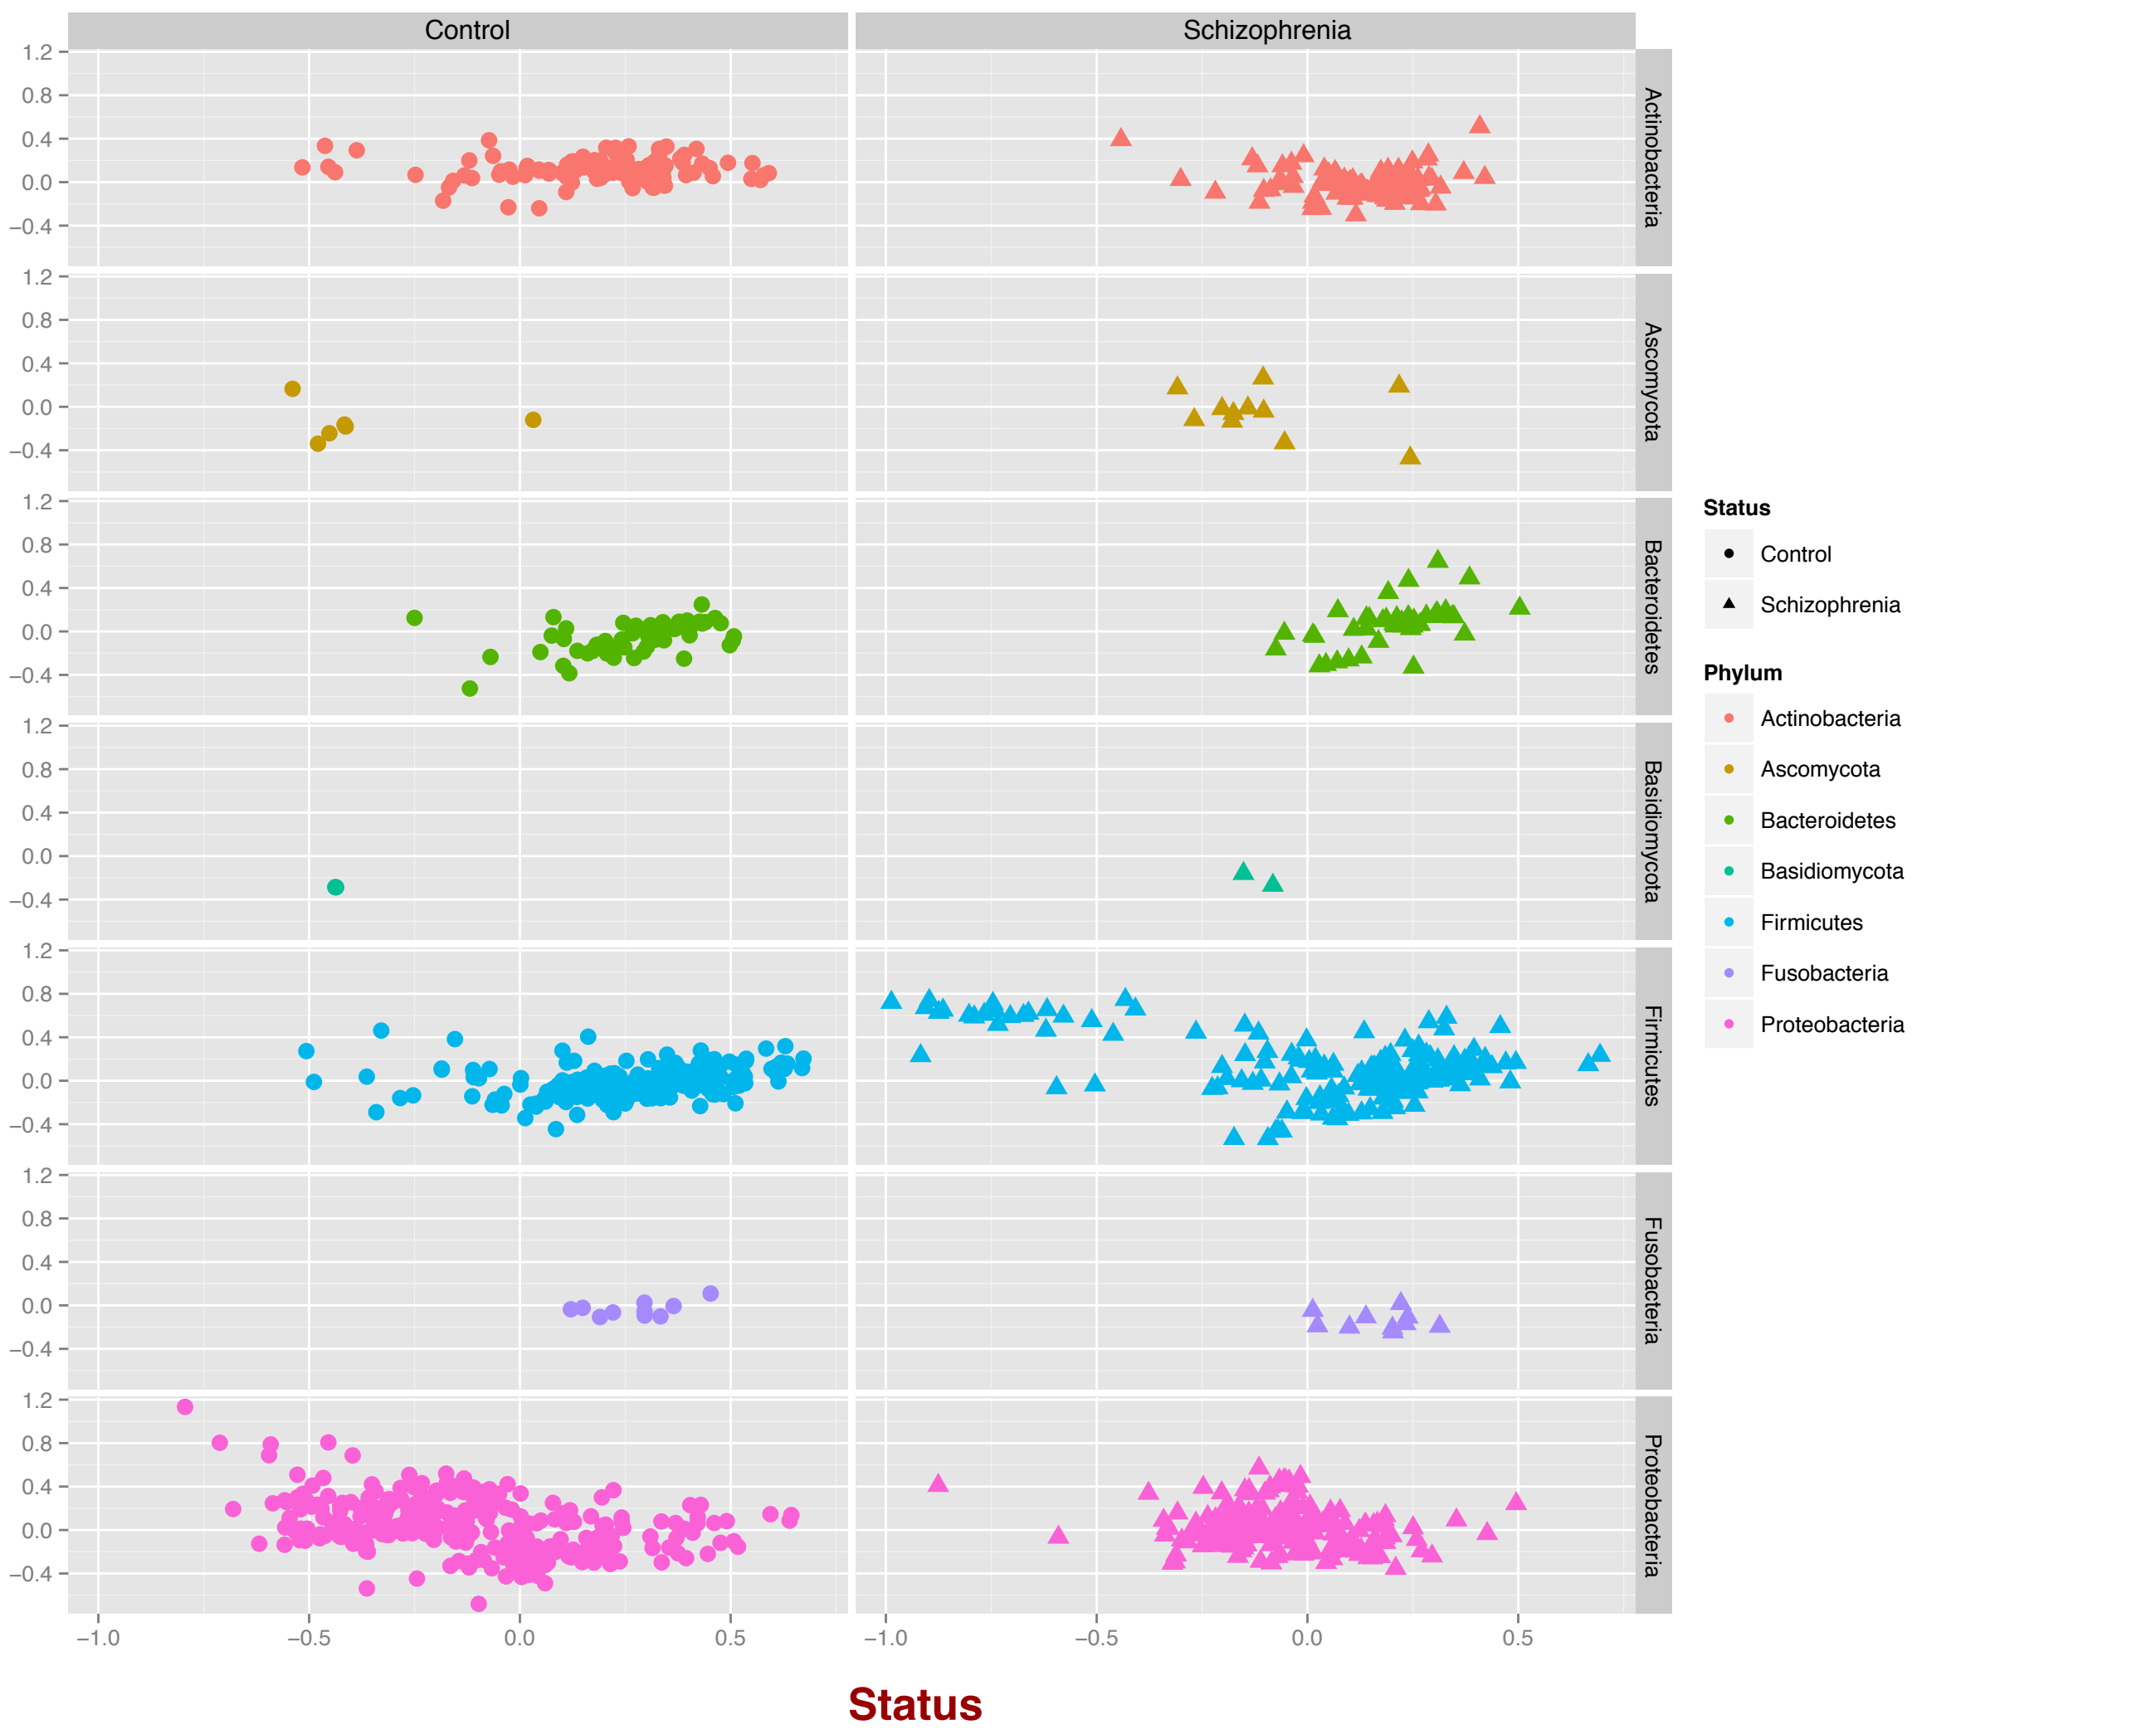

Supplement: peerj-03-1140-s001.pdf [file peerj-03-1140-s001.pdf]
