# Supplementary material for: Composition, taxonomy and functional diversity of the oropharynx microbiome in individuals with schizophrenia and controls
Source: PubMed Central journal article supplement (PMC4556144; doi:10.7717/peerj.1140), 2015-08-25
Supplement: peerj-03-1140-s002.pdf [file peerj-03-1140-s002.pdf]

**Effect Size (Log2 Fold Change)**

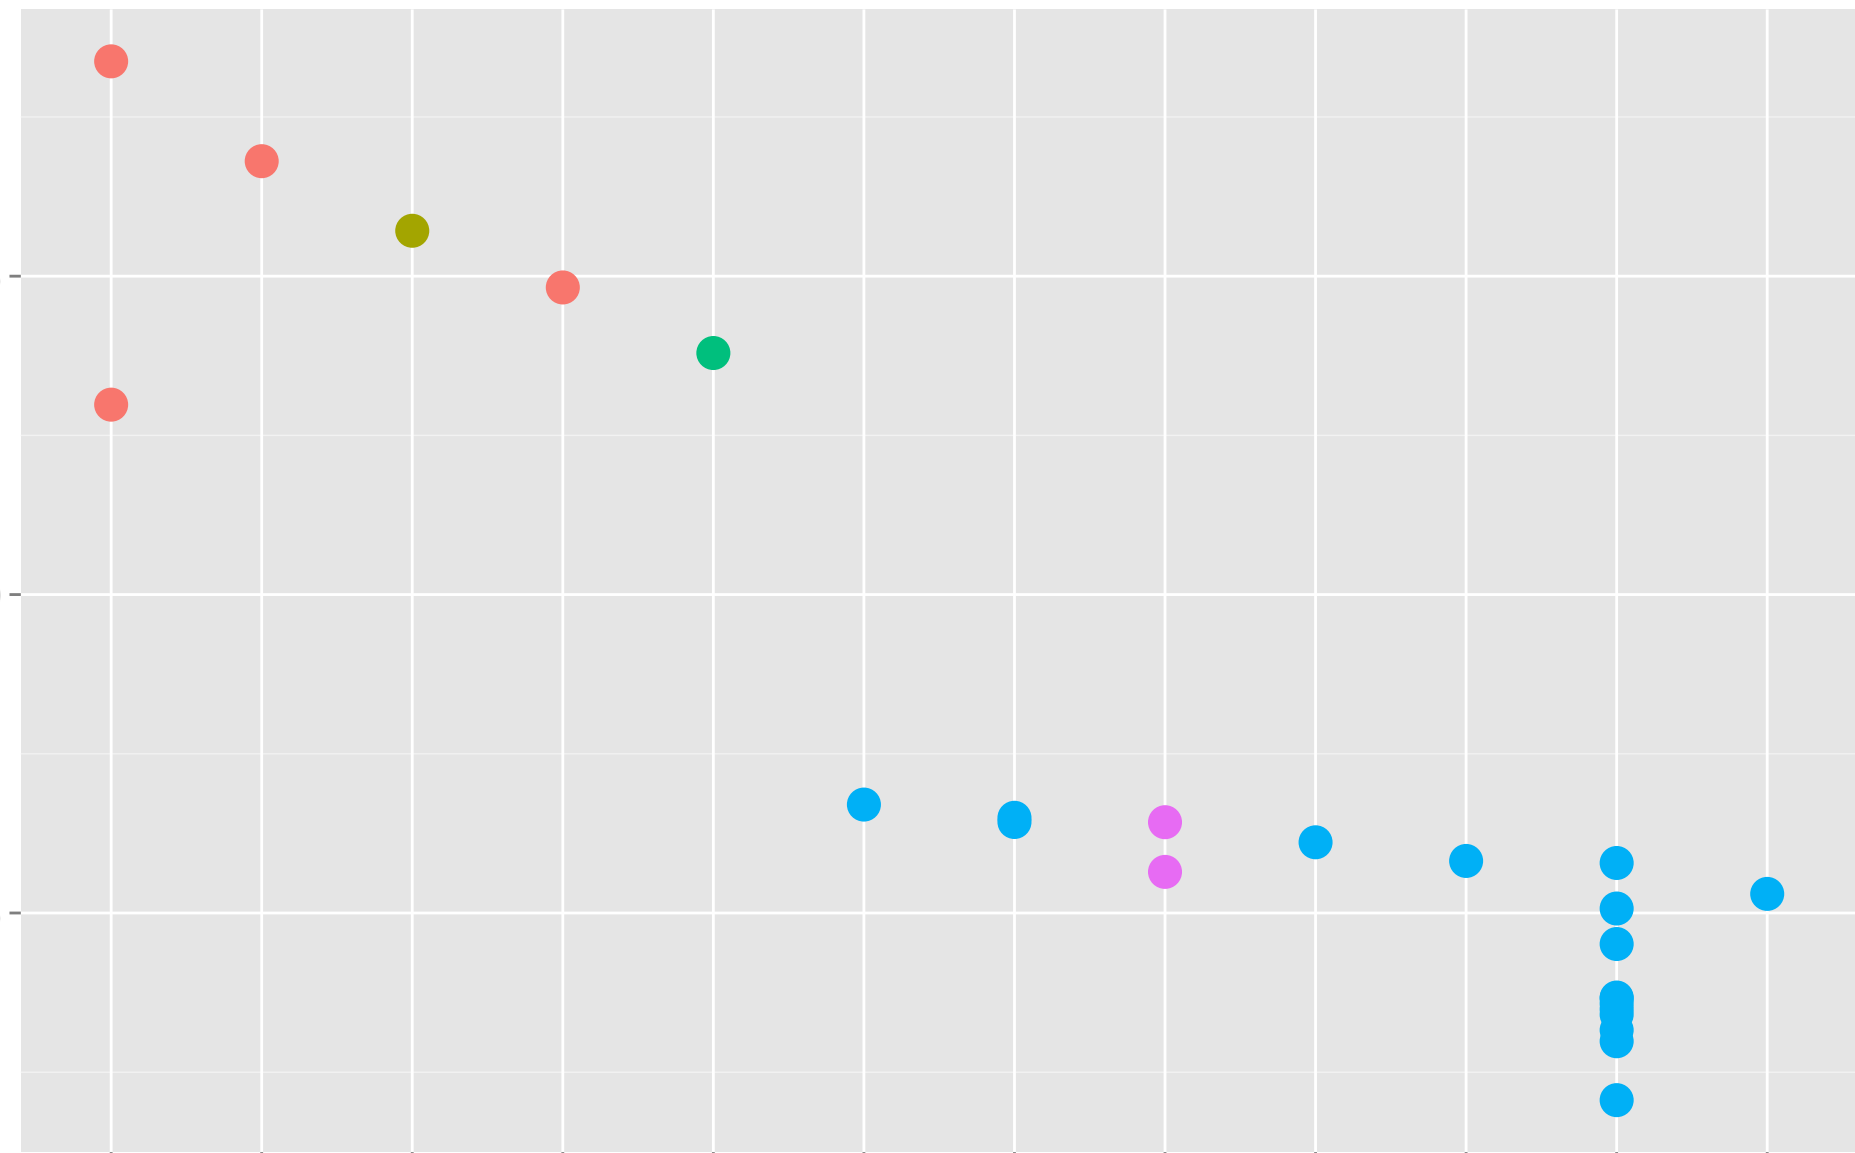

- Phylum**
- Firmicutes
  - Ascomycota
  - Actinobacteria
  - Proteobacteria
  - Bacteroidetes

**Genus**
